# Supplementary material for: The association between cardiometabolic index and rheumatoid arthritis in American adults: the potential mediating role of hypertension, diabetes, and inflammatory markers
Source: Research Square preprint supplement (doi:10.21203/rs.3.rs-7835440/v1), 2025-10-31
Supplement: Supplementary file 1 [file c288800a2297d7b216e5c3a3.xlsx]

## Sheet: Sheet 1
SEQN	Sex	Age	Race	Educational	Marital	PIR	PIR_group	SDMVPSU	SDMVSTRA	BMXWAIST	BMXHT	Drink	Glucocorticoid	Zhongxingli	Linba	Danhe	Plt	SII	SIRI	NLR	WHtR	Smoke	PA	PA_group	Hypertension	Diabetes	qz1	CMI	RA
93711	Male	56	Other Race	College diploma	Married/living with partner	5	high	2	134	86.6	170.6	yes	No	2.7	1.8	0.5	264	396	0.75	1.5	0.50762	Never	3600	active	No	No	2065.15	0.147919	0
93717	Male	22	Non-Hispanic White	High school diploma	Living alone	1.49	medium	1	145	86.2	174.1	yes	No	2.8	1.7	0.6	238	392	0.988235	1.64706	0.495118	Current	840	active	No	No	10019.7	0.416333	0
93718	Male	45	Non-Hispanic Non-Hispanic White	High school diploma	Living alone	1.18	low	1	144	77.5	157.3	yes	No	2.9	2.7	0.4	272	292.148	0.42963	1.07407	0.492689	Never	2400	active	Yes	No	3274.54	0.156875	0
93721	Female	60	Mexican American	<High school diploma	Married/living with partner	3.04	medium	2	136	113.2	154	yes	No	2.5	2.9	0.4	239	206.034	0.344828	0.862069	0.735065	Never	0	inactive	No	No	1431.51	0.56524	0
93722	Female	60	Non-Hispanic White	College diploma	Living alone	2.07	medium	1	139	89.7	154.6	yes	No	2.5	1.8	0.3	211	293.056	0.416667	1.38889	0.580207	Never	0	inactive	No	No	21051.6	0.175211	0
93731	Male	20	Mexican American	College diploma	Living alone	5	high	2	141	101.7	179.9	yes	No	5.4	2.2	0.8	261	640.636	1.96364	2.45455	0.565314	Never	8640	active	No	No	4680.19	0.483536	0
93738	Male	26	Other Hispanic	College diploma	Living alone	5	high	1	134	102.7	170.2	yes	No	3.9	2.5	0.4	259	404.04	0.624	1.56	0.603408	Former	29520	active	No	No	9849.02	0.507773	0
93742	Male	72	Non-Hispanic Non-Hispanic White	College diploma	Living alone	3.62	high	2	146	115	178.3	yes	No	1.4	1.1	0.3	250	318.182	0.381818	1.27273	0.64498	Former	3840	active	Yes	Yes	2347.34	0.616372	1
93752	Female	73	Non-Hispanic White	College diploma	Living alone	3.98	high	1	147	88.6	153.6	yes	No	3.4	2.8	0.7	323	392.214	0.85	1.21429	0.576823	Current	4960	active	No	No	9101.87	0.772943	0
93755	Female	26	Non-Hispanic Non-Hispanic White	College diploma	Living alone	2.07	medium	1	139	94.2	178.5	yes	No	4.2	3.3	0.7	315	400.909	0.890909	1.27273	0.527731	Former	2400	active	No	No	5544.99	0.302594	0
93758	Female	55	Non-Hispanic White	<High school diploma	Married/living with partner	0.75	low	2	139	101.8	156.9	yes	No	4.6	0.4	0.3	212	2438	3.45	11.5	0.648821	Current	0	inactive	Yes	Yes	3989.75	1.22867	1
93763	Male	40	Non-Hispanic White	High school diploma	Married/living with partner	3.25	medium	1	141	94.1	181.5	yes	No	4	2	0.5	156	312	1	2	0.518457	Former	11040	active	Yes	No	16814.6	2.10006	1
93766	Female	36	Other Hispanic	<High school diploma	Living alone	0.52	low	2	142	87	156.6	yes	No	2.4	2.1	0.3	235	268.571	0.342857	1.14286	0.555556	Never	3120	active	Yes	Yes	3070.03	1.01637	0
93772	Female	55	Non-Hispanic Non-Hispanic White	High school diploma	Living alone	0.7	low	1	141	110.4	161.9	yes	No	2.6	0.9	0.4	178	514.222	1.15556	2.88889	0.681902	Never	0	inactive	Yes	No	3366.77	0.704418	1
93773	Male	69	Non-Hispanic White	College diploma	Living alone	0.39	low	2	141	92.2	176	yes	No	3.8	2.4	0.4	242	383.167	0.633333	1.58333	0.523864	Former	0	inactive	No	No	3791.51	0.719029	0
93775	Female	47	Other Race	College diploma	Married/living with partner	3.73	high	1	137	87.5	150.4	yes	No	6.2	2.3	0.7	271	730.522	1.88696	2.69565	0.581782	Former	24480	active	No	No	2222.02	0.228534	0
93776	Female	32	Non-Hispanic Non-Hispanic White	High school diploma	Living alone	1.18	low	1	144	75.6	157.8	no	No	4.1	1.7	0.6	254	612.588	1.44706	2.41176	0.479087	Never	4620	active	Yes	No	3623.26	0.0587403	0
93780	Female	46	Other Race	High school diploma	Married/living with partner	1.22	low	1	141	104.4	161.7	yes	No	4.6	2.3	0.8	351	702	1.6	2	0.64564	Former	0	inactive	Yes	No	7183.76	1.49474	1
93782	Female	25	Non-Hispanic Non-Hispanic White	College diploma	Living alone	4.65	high	1	143	76.4	164.7	yes	No	2.5	1.6	0.4	271	423.438	0.625	1.5625	0.463874	Never	3600	active	No	No	6005.43	0.180234	0
93783	Female	21	Other Hispanic	High school diploma	Living alone	0.41	low	2	141	82	156.9	no	No	4.4	2.4	0.9	247	452.833	1.65	1.83333	0.522626	Never	20160	active	No	No	9861.05	0.231822	0
93789	Female	34	Non-Hispanic White	College diploma	Living alone	5	high	2	145	79.9	173.4	yes	No	3.5	2.1	0.4	219	365	0.666667	1.66667	0.460784	Never	4560	active	No	No	44934.9	0.10069	0
93795	Male	64	Non-Hispanic Non-Hispanic White	<High school diploma	Married/living with partner	2.43	medium	1	147	65.9	168.6	yes	No	2.6	3.3	0.5	157	123.697	0.393939	0.787879	0.390866	Current	1200	active	Yes	No	763.264	0.203844	0
93800	Female	80	Non-Hispanic White	College diploma	Living alone	2.8	medium	1	134	87.8	162.8	yes	No	5.1	1.1	0.4	208	964.364	1.85455	4.63636	0.539312	Former	0	inactive	Yes	No	5009.2	0.144715	0
93801	Male	59	Other Hispanic	College diploma	Married/living with partner	5	high	1	134	97.3	179	yes	No	3	3.4	0.8	259	228.529	0.705882	0.882353	0.543575	Never	0	inactive	Yes	Yes	6877.82	0.91691	0
93811	Male	24	Other Race	College diploma	Living alone	2.94	medium	1	136	90.9	164.2	yes	No	6.6	2.5	0.8	310	818.4	2.112	2.64	0.553593	Current	4320	active	No	No	4162.96	0.568555	0
93812	Male	67	Non-Hispanic White	College diploma	Married/living with partner	5	high	2	147	113.1	174.8	yes	No	4.6	1.5	0.6	191	585.733	1.84	3.06667	0.647025	Former	5840	active	Yes	Yes	46082.7	2.22059	0
93814	Female	41	Non-Hispanic Non-Hispanic White	College diploma	Married/living with partner	5	high	2	134	90.7	168.9	yes	No	4.4	1.9	0.5	241	558.105	1.15789	2.31579	0.537004	Never	1440	active	No	No	4626.06	0.230204	0
93815	Female	32	Other Race	College diploma	Living alone	1.12	low	2	145	93	161.5	yes	No	5.4	2.2	0.5	264	648	1.22727	2.45455	0.575851	Never	1680	active	No	No	1824.7	2.15424	0
93834	Female	48	Non-Hispanic White	<High school diploma	Married/living with partner	0.28	low	1	145	125.7	161.7	yes	No	5	3.6	0.6	273	379.167	0.833333	1.38889	0.777365	Former	560	inactive	Yes	Yes	4097.68	4.7944	1
93840	Male	47	Other Race	College diploma	Married/living with partner	5	high	1	137	86.2	180.7	yes	No	2.9	1.6	0.5	216	391.5	0.90625	1.8125	0.477034	Current	3320	active	No	No	2247.12	0.208969	0
93843	Female	42	Other Hispanic	College diploma	Married/living with partner	5	high	1	134	75	163.8	yes	No	3.5	0.8	0.4	199	870.625	1.75	4.375	0.457875	Never	9480	active	No	No	12139.3	0.12692	0
93847	Female	43	Mexican American	<High school diploma	Married/living with partner	0.1	low	1	148	111.1	156.6	yes	No	2.9	3	0.6	291	281.3	0.58	0.966667	0.709451	Never	7200	active	No	No	4213.33	0.280233	0
93869	Male	80	Non-Hispanic White	College diploma	Living alone	1.49	medium	1	134	93.6	176.7	yes	No	4.9	1	0.6	247	1210.3	2.94	4.9	0.529711	Former	0	inactive	No	Yes	3414.42	0.361827	0
93870	Female	20	Non-Hispanic White	College diploma	Living alone	3.79	high	1	138	72	158.1	no	No	2.2	1.7	0.5	161	208.353	0.647059	1.29412	0.455408	Never	9600	active	No	No	11827.3	0.11556	0
93875	Male	37	Non-Hispanic Non-Hispanic White	<High school diploma	Living alone	0.58	low	2	135	87.3	174.4	yes	No	3.3	1.7	0.5	257	498.882	0.970588	1.94118	0.500573	Never	25920	active	Yes	No	3749.8	0.251165	0
93878	Female	59	Non-Hispanic Non-Hispanic White	High school diploma	Living alone	0.79	low	2	145	90.5	162.5	yes	No	1.6	1.3	0.3	251	308.923	0.369231	1.23077	0.556923	Former	0	inactive	No	No	1690.49	0.268804	1
93887	Male	63	Non-Hispanic White	College diploma	Living alone	1.4	medium	2	146	100	174.2	yes	No	2.6	1.2	0.3	173	374.833	0.65	2.16667	0.574053	Former	0	inactive	Yes	Yes	2964.01	0.580095	0
93888	Female	37	Non-Hispanic White	College diploma	Married/living with partner	3.21	medium	2	140	80.6	167.6	no	No	3.8	1.3	0.5	190	555.385	1.46154	2.92308	0.480907	Never	1920	active	No	No	1929.07	0.178423	0
93890	Male	27	Other Race	College diploma	Living alone	3.4	medium	2	135	83	177.5	yes	No	2.3	3.2	0.4	207	148.781	0.2875	0.71875	0.467606	Never	3480	active	No	No	2472.37	0.204108	0
93900	Male	48	Mexican American	<High school diploma	Married/living with partner	1.29	low	2	144	105.5	163.1	yes	No	4.1	0.9	0.5	243	1107	2.27778	4.55556	0.646842	Former	960	active	No	Yes	9634.32	0.73008	0
93918	Male	36	Non-Hispanic White	High school diploma	Married/living with partner	1.63	medium	1	142	118	192.9	yes	No	3	2.5	0.5	254	304.8	0.6	1.2	0.611716	Former	160	inactive	No	No	6357.21	0.508815	0
93920	Female	61	Other Race	College diploma	Married/living with partner	5	high	1	148	76.7	154.2	yes	No	1.5	1.5	0.4	215	215	0.4	1	0.497406	Never	720	active	No	No	2095.44	0.269404	0
93926	Male	31	Other Race	High school diploma	Living alone	2.03	medium	1	145	130.2	172.1	yes	No	4.6	2.3	0.6	273	546	1.2	2	0.756537	Never	1680	active	No	No	20966.8	1.13623	0
93929	Female	35	Non-Hispanic White	College diploma	Married/living with partner	5	high	2	140	102.6	171.5	yes	No	5.8	1.8	0.5	274	882.889	1.61111	3.22222	0.598251	Never	2160	active	No	No	20738.2	0.478351	1
93932	Female	54	Other Race	College diploma	Married/living with partner	5	high	1	137	106.5	158.6	yes	No	2.1	3	0.3	384	268.8	0.21	0.7	0.671501	Never	1920	active	Yes	No	2398.26	0.951864	0
93942	Female	52	Non-Hispanic White	College diploma	Married/living with partner	5	high	2	134	110.5	169.4	yes	No	2.9	2	0.6	312	452.4	0.87	1.45	0.652302	Never	240	inactive	No	No	43245.8	0.641969	0
93945	Male	66	Non-Hispanic Non-Hispanic White	<High school diploma	Living alone	1.4	medium	2	146	78.4	162.6	yes	No	2.3	1	0.4	249	572.7	0.92	2.3	0.482165	Never	1200	active	No	No	1337.35	0.158457	0
93950	Male	30	Other Hispanic	High school diploma	Married/living with partner	3.32	medium	2	148	101.9	159.5	yes	No	5.7	2.2	0.5	154	399	1.29545	2.59091	0.638871	Current	15360	active	No	No	10696.3	0.519731	0
93957	Female	41	Non-Hispanic White	College diploma	Married/living with partner	1.99	medium	2	139	97.5	166.5	yes	No	2	2.7	0.4	291	215.556	0.296296	0.740741	0.585586	Never	10080	active	Yes	Yes	5997.95	1.13024	1
93960	Male	60	Non-Hispanic Non-Hispanic White	College diploma	Married/living with partner	0.85	low	2	145	132.6	175.2	yes	No	4.5	2.3	0.5	197	385.435	0.978261	1.95652	0.756849	Never	1080	active	Yes	Yes	1434.65	0.800487	0
93964	Male	52	Other Race	College diploma	Married/living with partner	4.81	high	2	138	100.4	172	yes	No	4.3	3.2	0.6	276	370.875	0.80625	1.34375	0.583721	Former	1040	active	Yes	No	2124.37	0.65923	0
93965	Female	30	Other Hispanic	College diploma	Married/living with partner	4.25	high	2	148	78	159.5	yes	No	3.2	2.1	0.6	237	361.143	0.914286	1.52381	0.489028	Never	6160	active	No	No	11163.2	0.154333	0
93968	Male	57	Non-Hispanic Non-Hispanic White	<High school diploma	Married/living with partner	2.99	medium	1	145	98.9	171.8	yes	No	4	2.8	0.8	222	317.143	1.14286	1.42857	0.575669	Current	0	inactive	Yes	No	2399.58	0.513011	0
93972	Male	35	Non-Hispanic White	College diploma	Married/living with partner	3.92	high	1	143	107.7	186.3	yes	No	5.7	3.4	0.7	244	409.059	1.17353	1.67647	0.5781	Current	34800	active	No	No	25719.4	0.235716	0
93974	Male	59	Non-Hispanic White	College diploma	Living alone	1.66	medium	1	148	110.7	181.8	yes	No	4.3	1.7	0.8	192	485.647	2.02353	2.52941	0.608911	Never	2880	active	No	No	10609.2	1.1708	0
93975	Female	54	Non-Hispanic White	High school diploma	Living alone	1.68	medium	2	148	97.5	161.4	yes	No	4.2	1.5	0.4	241	674.8	1.12	2.8	0.604089	Never	3360	active	No	No	12913.2	0.122459	0
93980	Female	29	Non-Hispanic White	College diploma	Living alone	5	high	1	139	76.7	173.8	yes	No	2.5	3.7	0.6	317	214.189	0.405405	0.675676	0.441312	Never	1920	active	No	No	26594	0.348636	0
93984	Female	32	Non-Hispanic White	College diploma	Married/living with partner	2.79	medium	2	135	103	160.7	yes	No	5	1.2	0.5	163	679.167	2.08333	4.16667	0.640946	Never	42960	active	No	No	6666.6	0.401067	1
93988	Female	32	Non-Hispanic White	High school diploma	Married/living with partner	0.65	low	2	135	72.5	163.6	yes	No	3.1	1.8	0.5	165	284.167	0.861111	1.72222	0.443154	Never	3600	active	No	No	17406.2	0.156706	0
93998	Female	24	Non-Hispanic White	High school diploma	Living alone	1.83	medium	1	142	78.6	159.1	yes	No	3.4	2.3	0.5	232	342.957	0.73913	1.47826	0.494029	Never	9360	active	No	No	14801.3	0.276886	0
93999	Female	23	Non-Hispanic Non-Hispanic White	College diploma	Living alone	4.98	high	2	144	81.5	166.7	yes	No	3	1.1	0.4	205	559.091	1.09091	2.72727	0.488902	Never	1440	active	No	No	5754.82	0.100976	0
94007	Male	79	Non-Hispanic Non-Hispanic White	High school diploma	Living alone	3.73	high	1	134	84.7	162.3	yes	No	3.5	1.6	0.3	208	455	0.65625	2.1875	0.521873	Never	4480	active	Yes	Yes	1984.14	0.329561	0
94012	Female	25	Other Race	College diploma	Married/living with partner	2.15	medium	1	135	92.5	164.8	yes	No	6.9	2.9	0.8	349	830.379	1.90345	2.37931	0.561286	Current	9600	active	No	No	20888.6	0.555141	0
94013	Male	56	Non-Hispanic White	College diploma	Living alone	3.85	high	2	140	88	174.5	yes	No	3.5	1.5	0.6	217	506.333	1.4	2.33333	0.504298	Former	21760	active	No	No	5352.82	0.407119	0
94015	Female	30	Non-Hispanic White	<High school diploma	Living alone	1.18	low	1	135	91.6	159.8	yes	No	2.5	2.4	0.5	190	197.917	0.520833	1.04167	0.573217	Never	0	inactive	No	No	8592.12	0.28066	0
94029	Female	46	Non-Hispanic White	College diploma	Married/living with partner	4.15	high	1	147	85.8	166.2	yes	No	2.7	1	0.4	228	615.6	1.08	2.7	0.516245	Former	21600	active	No	No	14017.5	0.132455	1
94030	Male	45	Non-Hispanic White	<High school diploma	Married/living with partner	3.98	high	2	136	107.2	193.9	yes	No	2.6	2.4	0.5	250	270.833	0.541667	1.08333	0.552862	Former	5760	active	No	No	20433.7	0.216632	0
94034	Female	54	Other Hispanic	<High school diploma	Married/living with partner	0.41	low	2	141	102.3	144.5	yes	No	4.4	2.7	0.5	203	330.815	0.814815	1.62963	0.707958	Never	0	inactive	No	Yes	3414.32	0.72673	0
94038	Female	59	Mexican American	College diploma	Living alone	0.91	low	2	140	103.1	162.5	yes	No	4.5	3.1	0.4	269	390.484	0.580645	1.45161	0.634462	Current	0	inactive	No	Yes	7987.73	1.00639	0
94042	Male	26	Other Race	High school diploma	Living alone	1.18	low	2	144	84.3	178.7	yes	No	3	1.1	0.3	186	507.273	0.818182	2.72727	0.47174	Never	6240	active	No	No	13664.3	0.469758	0
94043	Male	64	Other Race	College diploma	Married/living with partner	5	high	2	138	92.8	167.5	yes	No	4	2	0.6	266	532	1.2	2	0.55403	Current	0	inactive	No	Yes	1806.17	0.330327	0
94044	Female	34	Other Hispanic	<High school diploma	Married/living with partner	5	high	1	134	73.3	157.5	yes	No	2.3	2	0.6	194	223.1	0.69	1.15	0.465397	Former	21600	active	No	No	8268.42	0.0788266	0
94047	Female	45	Mexican American	High school diploma	Married/living with partner	2.72	medium	2	138	109.2	162.3	yes	No	3.1	1.8	0.6	185	318.611	1.03333	1.72222	0.672828	Current	0	inactive	No	Yes	6519.85	1.70883	0
94049	Female	66	Non-Hispanic Non-Hispanic White	College diploma	Living alone	1.02	low	1	139	125.2	143.7	yes	No	1.4	2.5	0.4	222	124.32	0.224	0.56	0.87126	Never	1020	active	Yes	No	1664.07	0.890468	0
94050	Female	55	Non-Hispanic White	High school diploma	Living alone	1.01	low	2	146	97.5	171.2	yes	No	4.3	1.8	0.6	301	719.056	1.43333	2.38889	0.569509	Never	17040	active	Yes	No	14421	1.18602	1
94057	Female	62	Non-Hispanic White	<High school diploma	Living alone	3.15	medium	1	135	106	161.5	yes	No	5.8	1.3	0.6	247	1102	2.67692	4.46154	0.656347	Current	240	inactive	Yes	No	5846.23	0.726442	1
94067	Male	44	Mexican American	<High school diploma	Married/living with partner	1.22	low	2	140	112.8	166	yes	No	3.5	1.5	0.5	281	655.667	1.16667	2.33333	0.679518	Former	6000	active	No	No	3413.41	0.680614	0
94068	Male	69	Non-Hispanic White	College diploma	Married/living with partner	4.93	high	1	143	104.4	181.8	yes	No	4.7	2.3	0.5	147	300.391	1.02174	2.04348	0.574257	Former	480	inactive	Yes	No	26510.2	0.323968	0
94069	Male	61	Non-Hispanic White	High school diploma	Married/living with partner	2.65	medium	2	147	115.3	183.5	no	No	5.2	1.7	0.6	209	639.294	1.83529	3.05882	0.628338	Never	0	inactive	Yes	Yes	36172.7	1.03735	0
94073	Male	69	Other Hispanic	<High school diploma	Living alone	3.78	high	1	145	120	166.8	yes	No	4.2	1.6	0.7	163	427.875	1.8375	2.625	0.719424	Former	5800	active	Yes	Yes	1248.03	0.868271	1
94074	Male	29	Non-Hispanic White	College diploma	Living alone	5	high	2	142	78.5	173.2	yes	No	2.2	1.2	0.4	219	401.5	0.733333	1.83333	0.453233	Never	0	inactive	No	No	28325.2	0.430796	0
94093	Male	36	Non-Hispanic White	High school diploma	Married/living with partner	5	high	2	140	116.6	189.1	yes	No	3.8	1.9	0.7	258	516	1.4	2	0.616605	Former	1680	active	No	Yes	27870.1	0.882383	0
94095	Female	78	Non-Hispanic Non-Hispanic White	College diploma	Living alone	1.69	medium	2	147	103.9	151.7	yes	No	4.5	3.4	0.7	231	305.735	0.926471	1.32353	0.684904	Never	0	inactive	Yes	No	2387.15	0.497045	1
94098	Female	23	Non-Hispanic Non-Hispanic White	College diploma	Living alone	1.54	medium	1	144	96.8	163.2	yes	No	4.6	2.3	0.5	310	620	1	2	0.593137	Never	800	active	No	No	4373.64	0.360376	0
94101	Female	64	Other Race	College diploma	Married/living with partner	5	high	2	138	89.5	158	yes	No	4.1	2.3	0.6	194	345.826	1.06957	1.78261	0.566456	Never	6480	active	Yes	No	3882.38	0.789466	0
94105	Female	46	Mexican American	College diploma	Married/living with partner	5	high	2	141	97.1	162.7	yes	No	7.6	3.5	1	294	638.4	2.17143	2.17143	0.596804	Current	3600	active	No	No	4564.94	0.328953	0
94108	Male	64	Mexican American	<High school diploma	Married/living with partner	1.72	medium	1	148	94.3	165	yes	No	3	2.4	0.6	202	252.5	0.75	1.25	0.571515	Former	1440	active	Yes	No	1721.27	0.843126	0
94112	Male	28	Mexican American	College diploma	Living alone	1.82	medium	2	136	84.5	162.5	yes	No	2.5	1.3	0.4	245	471.154	0.769231	1.92308	0.52	Former	8880	active	No	No	9021.79	0.187264	0
94113	Female	60	Non-Hispanic White	High school diploma	Living alone	2.02	medium	1	141	81.3	159	yes	No	2.7	1.9	0.3	323	459	0.426316	1.42105	0.511321	Never	0	inactive	No	Yes	12129.6	0.746163	0
94126	Female	62	Non-Hispanic Non-Hispanic White	<High school diploma	Living alone	1.54	medium	1	147	108.7	155	no	No	2.5	2.3	0.5	257	279.348	0.543478	1.08696	0.70129	Never	4800	active	Yes	Yes	1377.5	0.220349	0
94138	Female	72	Other Race	College diploma	Married/living with partner	5	high	1	145	88.8	152.9	yes	No	3.6	1.9	0.4	235	445.263	0.757895	1.89474	0.580772	Never	6720	active	Yes	Yes	1806.51	0.523862	1
94139	Female	49	Other Hispanic	College diploma	Married/living with partner	1.15	low	2	138	113.2	163.3	yes	No	6.8	2	0.6	257	873.8	2.04	3.4	0.693203	Current	400	inactive	No	No	3376.15	0.292314	1
94141	Male	71	Non-Hispanic Non-Hispanic White	College diploma	Married/living with partner	5	high	1	141	91.1	178.2	no	No	3.1	1.2	0.4	179	462.417	1.03333	2.58333	0.511223	Never	600	active	Yes	No	3108.21	0.170408	0
94154	Female	80	Non-Hispanic White	College diploma	Married/living with partner	5	high	2	143	93	145.7	yes	No	4.1	2.1	0.7	200	390.476	1.36667	1.95238	0.638298	Never	720	active	No	No	8978.05	0.820893	0
94166	Male	28	Non-Hispanic White	College diploma	Married/living with partner	0.99	low	2	136	102.5	174.5	yes	No	4	1.3	0.5	250	769.231	1.53846	3.07692	0.587393	Never	1040	active	No	No	21073.1	0.449071	0
94177	Female	59	Mexican American	College diploma	Living alone	1.64	medium	2	140	85.7	145.7	no	No	3.5	2.5	0.6	253	354.2	0.84	1.4	0.588195	Never	0	inactive	No	No	3720.55	0.256376	0
94187	Female	54	Other Race	College diploma	Married/living with partner	5	high	2	138	84.8	144.7	yes	No	2.7	1.6	0.4	213	359.438	0.675	1.6875	0.58604	Never	0	inactive	Yes	No	4408.56	0.203137	0
94189	Female	21	Mexican American	High school diploma	Married/living with partner	1.49	medium	2	136	113	158.3	yes	No	4.8	2.9	0.6	206	340.966	0.993103	1.65517	0.713834	Never	0	inactive	No	No	7867.83	0.181913	0
94190	Male	43	Other Race	College diploma	Living alone	4.07	high	1	148	92.7	175.3	yes	No	3.8	2.2	0.4	210	362.727	0.690909	1.72727	0.528808	Current	1500	active	No	No	4673.81	0.290089	0
94193	Female	58	Non-Hispanic Non-Hispanic White	College diploma	Living alone	1.68	medium	2	137	128.5	168.8	yes	No	2.8	2.3	0.3	264	321.391	0.365217	1.21739	0.761256	Never	720	active	Yes	No	4406.81	0.454834	1
94207	Male	62	Non-Hispanic Non-Hispanic White	<High school diploma	Married/living with partner	0.76	low	2	137	106.1	166.7	yes	No	4	2.8	0.8	97	138.571	1.14286	1.42857	0.636473	Current	1440	active	No	No	2397.6	0.278836	1
94223	Female	43	Other Hispanic	College diploma	Married/living with partner	0.94	low	2	139	92.8	167	yes	No	8.7	2.8	0.7	319	991.179	2.175	3.10714	0.555689	Former	200	inactive	No	No	3780.08	1.79225	0
94242	Male	60	Non-Hispanic Non-Hispanic White	High school diploma	Married/living with partner	0.07	low	1	139	94.6	174.6	yes	No	1.5	2	0.5	184	138	0.375	0.75	0.54181	Current	840	active	Yes	Yes	1335.14	0.209758	1
94243	Male	80	Other Race	High school diploma	Married/living with partner	1.48	medium	1	135	105.5	170	yes	No	2.6	1.5	0.5	133	230.533	0.866667	1.73333	0.620588	Former	0	inactive	Yes	Yes	2365.8	0.384364	1
94247	Male	27	Non-Hispanic White	High school diploma	Married/living with partner	2.13	medium	2	143	127.4	172.1	yes	No	3.9	2.7	0.6	193	278.778	0.866667	1.44444	0.740267	Former	1800	active	Yes	No	10086.7	0.911098	0
94250	Female	23	Non-Hispanic White	College diploma	Married/living with partner	3.37	medium	2	139	118.3	166.7	yes	No	5.7	1.9	0.7	322	966	2.1	3	0.709658	Former	4080	active	No	No	7088.83	0.304853	0
94251	Female	22	Non-Hispanic White	High school diploma	Married/living with partner	2.79	medium	1	145	81.9	162	yes	No	4.9	3.6	0.5	239	325.306	0.680556	1.36111	0.505556	Current	4320	active	No	No	14351.9	0.580166	0
94259	Female	50	Other Race	High school diploma	Married/living with partner	2.09	medium	1	138	83.9	166.6	yes	No	3.4	1.6	0.3	145	308.125	0.6375	2.125	0.503601	Never	2520	active	No	No	3698.8	0.0812762	0
94262	Male	22	Mexican American	High school diploma	Living alone	1.37	medium	1	135	76.2	183.3	yes	No	4.4	2.2	0.8	155	310	1.6	2	0.415712	Never	29760	active	No	No	13463.6	0.065251	0
94275	Male	54	Mexican American	College diploma	Married/living with partner	3.85	high	2	140	115.9	180.6	yes	No	3.5	1.9	0.6	153	281.842	1.10526	1.84211	0.64175	Never	0	inactive	Yes	No	3192.31	0.26451	0
94276	Male	80	Other Race	High school diploma	Married/living with partner	2.59	medium	1	135	88.5	153.7	yes	No	5	3.4	0.8	205	301.471	1.17647	1.47059	0.575797	Never	480	inactive	Yes	No	2353.34	2.5599	0
94277	Female	41	Other Hispanic	<High school diploma	Married/living with partner	0.62	low	2	148	103.2	151.2	no	No	5.4	1.7	0.4	286	908.471	1.27059	3.17647	0.68254	Never	600	active	No	No	1614.7	0.83319	0
94286	Female	75	Non-Hispanic Non-Hispanic White	College diploma	Living alone	5	high	1	143	87.2	165	yes	No	3.4	1.6	0.4	293	622.625	0.85	2.125	0.528485	Never	1920	active	Yes	No	3772.65	0.121912	0
94290	Female	35	Other Race	College diploma	Living alone	3.03	medium	1	144	89.9	154.5	yes	No	3.6	1.6	0.4	316	711	0.9	2.25	0.581877	Never	960	active	No	No	3399.95	0.249943	0
94300	Female	69	Non-Hispanic White	College diploma	Living alone	3.87	high	2	142	113	166.2	yes	No	3.3	2.1	0.6	325	510.714	0.942857	1.57143	0.679904	Never	0	inactive	Yes	No	24106.1	0.942919	0
94301	Female	64	Other Race	College diploma	Married/living with partner	1.79	medium	2	135	85.1	151.7	yes	No	2.1	1.2	0.3	208	364	0.525	1.75	0.560976	Never	0	inactive	Yes	No	928.868	0.150276	0
94314	Male	48	Other Race	<High school diploma	Married/living with partner	1.79	medium	1	137	88.6	171.8	yes	No	3	1.9	0.3	171	270	0.473684	1.57895	0.515716	Current	0	inactive	No	No	4580.63	0.505322	0
94319	Male	44	Non-Hispanic White	College diploma	Married/living with partner	5	high	1	148	96.3	172.4	yes	No	2.3	1.3	0.3	229	405.154	0.530769	1.76923	0.558585	Former	5160	active	No	No	37505.8	0.950845	0
94320	Male	33	Non-Hispanic Non-Hispanic White	High school diploma	Living alone	1.18	low	2	146	69.5	179.3	yes	No	3.5	2.4	0.6	240	350	0.875	1.45833	0.387619	Current	37200	active	Yes	No	5200.65	0.0688132	0
94323	Male	60	Other Race	College diploma	Married/living with partner	5	high	1	137	111	160.7	yes	No	4.9	2.9	0.8	303	511.966	1.35172	1.68966	0.690728	Never	0	inactive	Yes	No	1641.8	0.773131	0
94324	Female	50	Non-Hispanic White	<High school diploma	Living alone	5	high	1	141	102.5	159	yes	No	3.2	1.6	0.4	184	368	0.8	2	0.644654	Former	4760	active	Yes	No	20770.4	0.854655	1
94330	Female	57	Non-Hispanic White	High school diploma	Married/living with partner	2.65	medium	2	147	121.8	154.5	no	No	4.7	2.8	0.5	216	362.571	0.839286	1.67857	0.78835	Never	1920	active	Yes	Yes	56174	0.619806	0
94335	Male	69	Other Race	<High school diploma	Married/living with partner	2.24	medium	1	138	101.2	160.9	yes	No	3.1	2.1	0.6	215	317.381	0.885714	1.47619	0.628962	Former	840	active	Yes	No	2456.27	1.26412	0
94336	Male	74	Other Hispanic	College diploma	Married/living with partner	1.73	medium	2	138	103.8	166.6	yes	No	4	2	0.4	236	472	0.8	2	0.623049	Never	0	inactive	Yes	Yes	3562.21	0.468977	0
94341	Male	24	Mexican American	High school diploma	Living alone	1.7	medium	2	136	103.2	178.7	yes	No	4.4	1.9	0.7	182	421.474	1.62105	2.31579	0.577504	Never	9120	active	No	No	6945.73	0.465539	0
94345	Male	65	Non-Hispanic White	High school diploma	Married/living with partner	1.69	medium	1	145	137	174.9	yes	No	6	1.7	0.8	205	723.529	2.82353	3.52941	0.783305	Former	4800	active	Yes	Yes	5106.07	1.50178	1
94362	Male	79	Non-Hispanic White	College diploma	Married/living with partner	2.79	medium	1	141	99.9	157.9	yes	No	4.1	2.7	0.5	213	323.444	0.759259	1.51852	0.632679	Former	11280	active	Yes	Yes	4719.54	14.6729	0
94366	Male	25	Other Race	College diploma	Married/living with partner	1.32	medium	2	138	87.5	176.6	yes	No	1.8	1.9	0.5	247	234	0.473684	0.947368	0.49547	Never	1600	active	No	No	3259.51	0.124353	0
94372	Male	68	Non-Hispanic Non-Hispanic White	College diploma	Married/living with partner	3.87	high	1	147	120.4	175.8	yes	No	3.9	2.2	0.6	200	354.545	1.06364	1.77273	0.684869	Never	3120	active	Yes	Yes	861.355	0.895755	0
94373	Female	80	Non-Hispanic White	<High school diploma	Living alone	1.54	medium	1	142	104	158.8	yes	No	4.6	1.8	0.7	173	442.111	1.78889	2.55556	0.654912	Never	240	inactive	No	No	4159.05	0.255071	0
94375	Female	30	Other Race	College diploma	Married/living with partner	3.18	medium	1	137	77.5	159.7	yes	No	4.3	3.1	0.7	338	468.839	0.970968	1.3871	0.485285	Never	21600	active	Yes	No	3936.99	0.181718	0
94376	Male	66	Non-Hispanic Non-Hispanic White	College diploma	Living alone	2.9	medium	1	140	111.8	170.9	yes	No	4.5	2.4	0.7	200	375	1.3125	1.875	0.654184	Current	0	inactive	No	No	1167.24	0.371594	0
94379	Female	24	Non-Hispanic White	High school diploma	Married/living with partner	2.55	medium	2	139	101.5	157.9	yes	No	4.7	2.9	0.6	255	413.276	0.972414	1.62069	0.642812	Former	9360	active	No	No	1994.41	0.739234	1
94388	Female	33	Non-Hispanic Non-Hispanic White	College diploma	Married/living with partner	0.8	low	1	139	91.7	165.4	yes	No	1.5	1.8	0.5	202	168.333	0.416667	0.833333	0.554414	Never	4800	active	No	No	2662.44	0.108068	0
94390	Female	72	Other Race	College diploma	Married/living with partner	1.15	low	2	138	116.3	155	yes	No	1.5	2.1	0.4	138	98.5714	0.285714	0.714286	0.750323	Never	0	inactive	Yes	Yes	1509.22	0.896745	0
94392	Male	25	Non-Hispanic Non-Hispanic White	College diploma	Living alone	3.23	medium	1	143	85.4	182	yes	No	3	1.7	0.3	189	333.529	0.529412	1.76471	0.469231	Never	12000	active	No	No	6653.32	0.200254	0
94408	Male	72	Non-Hispanic White	College diploma	Married/living with partner	2.59	medium	1	146	78.8	173.4	yes	No	5.3	2.4	0.8	281	620.542	1.76667	2.20833	0.454441	Current	4800	active	No	No	6354.37	0.187415	0
94428	Male	60	Other Hispanic	College diploma	Living alone	2.07	medium	2	146	135	164.2	yes	No	6.4	3.9	0.7	215	352.821	1.14872	1.64103	0.822168	Never	0	inactive	Yes	Yes	2091.97	1.35232	0
94438	Male	80	Other Hispanic	College diploma	Living alone	2.88	medium	2	134	96.3	175.6	yes	No	3.4	1.6	0.6	186	395.25	1.275	2.125	0.548405	Former	0	inactive	No	No	6434.33	0.272312	0
94443	Male	32	Mexican American	<High school diploma	Married/living with partner	2.39	medium	2	141	94.6	157.5	yes	No	3.9	1.7	0.6	229	525.353	1.37647	2.29412	0.600635	Current	34560	active	No	No	7780.71	0.186112	0
94446	Female	28	Other Hispanic	<High school diploma	Married/living with partner	0.73	low	1	137	115	165.7	yes	No	4.4	2.2	0.3	248	496	0.6	2	0.694025	Never	0	inactive	No	No	4402.04	0.4569	0
94453	Female	20	Non-Hispanic White	College diploma	Living alone	1.77	medium	2	141	97.7	166.4	yes	No	4.6	3.1	0.6	219	324.968	0.890323	1.48387	0.587139	Current	5760	active	No	No	12769.9	0.639673	0
94469	Female	37	Other Race	College diploma	Married/living with partner	5	high	2	134	95.6	163.3	yes	No	3.2	2.2	0.6	256	372.364	0.872727	1.45455	0.585426	Never	4880	active	No	No	12299.1	0.228813	0
94474	Male	55	Non-Hispanic White	High school diploma	Married/living with partner	3.66	high	2	139	90.5	183.6	yes	No	6	2	0.7	148	444	2.1	3	0.492919	Never	8160	active	Yes	Yes	29138.3	1.2056	0
94478	Female	37	Non-Hispanic Non-Hispanic White	College diploma	Living alone	0.91	low	2	144	76.1	163.6	yes	No	2.4	2.1	0.3	238	272	0.342857	1.14286	0.465159	Never	720	active	No	No	4772.37	0.0716768	0
94499	Male	62	Non-Hispanic Non-Hispanic White	High school diploma	Married/living with partner	2.65	medium	1	138	82.3	160.6	yes	No	2.4	2.2	0.4	189	206.182	0.436364	1.09091	0.512453	Never	3600	active	Yes	No	2374.52	0.407889	0
94509	Female	53	Non-Hispanic White	College diploma	Living alone	4.78	high	2	145	102.2	168.2	yes	No	3.3	2.3	0.3	332	476.348	0.430435	1.43478	0.60761	Never	6240	active	No	No	2622.4	0.454403	0
94512	Female	43	Mexican American	<High school diploma	Married/living with partner	1.22	low	2	140	83.7	155.4	yes	No	7.6	2.1	0.8	439	1588.76	2.89524	3.61905	0.53861	Never	240	inactive	Yes	Yes	2178.98	0.627568	0
94523	Female	65	Non-Hispanic Non-Hispanic White	College diploma	Married/living with partner	2.46	medium	1	144	99.3	158.2	yes	No	3.3	1.7	0.4	289	561	0.776471	1.94118	0.627686	Never	1000	active	Yes	No	3796.45	0.337128	1
94528	Male	34	Other Race	High school diploma	Married/living with partner	1.02	low	1	137	152.2	162.3	yes	No	6.8	1.5	0.8	199	902.133	3.62667	4.53333	0.93777	Never	4800	active	Yes	No	4387.33	0.819221	0
94530	Male	22	Non-Hispanic Non-Hispanic White	College diploma	Living alone	3.4	medium	2	137	77.4	157.7	yes	No	3.4	1.8	0.4	230	434.444	0.755556	1.88889	0.490805	Never	1000	active	No	No	7514.68	0.244243	0
94531	Female	34	Mexican American	College diploma	Married/living with partner	1.52	medium	1	144	101.7	157.6	yes	No	3.3	2.4	0.4	283	389.125	0.55	1.375	0.645305	Never	1320	active	No	No	6857.07	0.394059	0
94547	Female	67	Non-Hispanic Non-Hispanic White	High school diploma	Living alone	1.81	medium	2	137	76.1	151.3	yes	No	3	1.5	0.3	128	256	0.6	2	0.502974	Current	0	inactive	No	No	3135.29	0.08179	0
94554	Male	69	Mexican American	<High school diploma	Married/living with partner	4.07	high	1	137	96.7	174.2	yes	No	3.5	2.4	0.5	174	253.75	0.729167	1.45833	0.555109	Former	2400	active	Yes	Yes	883.051	0.358045	0
94557	Female	35	Non-Hispanic Non-Hispanic White	College diploma	Living alone	1.71	medium	1	145	102.7	156.8	yes	No	3	3.3	0.4	230	209.091	0.363636	0.909091	0.654974	Never	31680	active	Yes	No	2646.3	0.202831	0
94560	Female	24	Non-Hispanic White	College diploma	Married/living with partner	2.13	medium	2	143	125.7	171.1	no	No	5.2	2.4	0.8	428	927.333	1.73333	2.16667	0.734658	Never	28800	active	No	No	10863.7	0.428156	0
94564	Female	80	Other Hispanic	<High school diploma	Living alone	2.07	medium	2	148	89	154.6	yes	No	6	1.7	0.7	269	949.412	2.47059	3.52941	0.575679	Never	640	active	Yes	No	2264.74	0.478331	0
94565	Female	45	Other Hispanic	High school diploma	Married/living with partner	0.1	low	2	145	111.1	168.4	yes	No	6.4	2.4	0.7	268	714.667	1.86667	2.66667	0.659739	Never	6480	active	Yes	No	8772.34	0.805964	0
94568	Female	60	Mexican American	<High school diploma	Married/living with partner	0.57	low	2	142	103	161.1	yes	No	3.8	1.9	0.5	310	620	1	2	0.639354	Never	8580	active	Yes	No	1395.39	0.92332	0
94569	Female	27	Non-Hispanic White	College diploma	Living alone	4.04	high	1	142	84	152.7	yes	No	5.4	1.6	0.3	251	847.125	1.0125	3.375	0.550098	Never	10560	active	No	No	10504.6	0.32968	0
94571	Female	80	Non-Hispanic White	College diploma	Married/living with partner	3.4	medium	2	141	97.1	167.4	yes	No	3.8	1.2	0.6	238	753.667	1.9	3.16667	0.580048	Former	4800	active	Yes	No	4519.18	0.434058	1
94576	Female	33	Mexican American	High school diploma	Living alone	0.58	low	2	144	115.6	159	yes	No	5.9	3	0.5	318	625.4	0.983333	1.96667	0.727044	Never	0	inactive	No	No	5542.97	0.330833	0
94577	Female	30	Non-Hispanic White	College diploma	Living alone	5	high	1	138	81.6	175.9	yes	No	4.9	1.5	0.6	237	774.2	1.96	3.26667	0.4639	Never	1720	active	No	No	18829.9	0.142388	0
94578	Male	71	Non-Hispanic White	College diploma	Married/living with partner	1.73	medium	2	142	94.3	168.1	yes	No	3	2	0.6	238	357	0.9	1.5	0.560976	Former	0	inactive	Yes	Yes	1952.81	0.597492	0
94579	Male	52	Non-Hispanic Non-Hispanic White	High school diploma	Living alone	0.62	low	1	139	101	171.7	yes	No	1.8	2.2	0.3	195	159.545	0.245455	0.818182	0.588235	Never	480	inactive	No	Yes	4980.91	0.476138	0
94583	Male	80	Non-Hispanic White	<High school diploma	Living alone	1.19	low	1	145	85.4	168.1	yes	No	12.3	1.4	1.2	370	3250.71	10.5429	8.78571	0.508031	Current	0	inactive	Yes	No	2522.51	0.257479	1
94589	Male	33	Non-Hispanic White	College diploma	Married/living with partner	2.85	medium	1	135	103.1	183.2	yes	No	3.7	2.3	0.5	295	474.565	0.804348	1.6087	0.562773	Never	1920	active	No	No	15677.8	2.53433	0
94596	Male	45	Non-Hispanic White	College diploma	Married/living with partner	3.1	medium	1	146	93.5	175.8	yes	No	3.1	1.8	0.6	250	430.556	1.03333	1.72222	0.531854	Never	2720	active	No	No	9809.67	0.319889	0
94606	Female	57	Non-Hispanic White	College diploma	Married/living with partner	5	high	2	139	99.7	176.4	yes	No	4.4	2.8	0.5	325	510.714	0.785714	1.57143	0.565193	Former	0	inactive	Yes	Yes	2120.16	0.46591	1
94609	Female	70	Other Race	College diploma	Married/living with partner	5	high	2	134	85.8	161.9	yes	No	2.7	1.7	0.4	251	398.647	0.635294	1.58824	0.529957	Never	0	inactive	Yes	Yes	2369.67	0.579191	0
94618	Male	49	Non-Hispanic White	College diploma	Living alone	4.94	high	2	136	119.2	176.5	yes	No	3.1	1.5	0.5	167	345.133	1.03333	2.06667	0.675354	Former	2320	active	Yes	No	32950.8	0.895309	0
94619	Male	61	Non-Hispanic Non-Hispanic White	College diploma	Married/living with partner	4.04	high	1	144	99.9	174.3	yes	No	1.8	2.3	0.5	211	165.13	0.391304	0.782609	0.57315	Never	0	inactive	Yes	No	1039.75	0.350372	0
94624	Male	38	Other Race	College diploma	Married/living with partner	4.62	high	2	140	87.1	159.4	yes	No	4.6	2.6	0.5	278	491.846	0.884615	1.76923	0.546424	Never	4080	active	No	No	3093.19	1.17183	0
94625	Male	22	Non-Hispanic Non-Hispanic White	<High school diploma	Living alone	1.2	low	1	146	71.6	173.4	yes	No	2	2.3	0.6	205	178.261	0.521739	0.869565	0.412918	Current	13920	active	No	No	5393.74	0.354986	0
94627	Male	59	Other Hispanic	College diploma	Married/living with partner	1.72	medium	2	134	119.4	157	yes	No	7.1	1.8	0.6	323	1274.06	2.36667	3.94444	0.76051	Never	0	inactive	Yes	Yes	8522.89	1.39331	1
94631	Female	21	Non-Hispanic Non-Hispanic White	High school diploma	Living alone	2.37	medium	2	142	79	163.8	yes	No	1.4	1.3	0.5	314	338.154	0.538462	1.07692	0.482295	Never	10800	active	No	No	11112	0.125451	0
94632	Female	70	Non-Hispanic White	College diploma	Living alone	2.06	medium	2	141	95.5	165.8	yes	No	5.6	3.5	0.6	302	483.2	0.96	1.6	0.575995	Never	80	inactive	Yes	No	9407.04	0.416582	0
94633	Female	68	Non-Hispanic White	College diploma	Living alone	5	high	2	140	87.8	153.8	yes	No	3	2	0.5	404	606	0.75	1.5	0.570871	Former	960	active	No	No	16724.8	0.203965	1
94640	Female	55	Other Race	College diploma	Married/living with partner	5	high	1	141	97	151.5	no	No	2.9	2.1	0.3	311	429.476	0.414286	1.38095	0.640264	Never	360	inactive	No	No	2095.18	1.73852	0
94644	Male	24	Non-Hispanic White	<High school diploma	Married/living with partner	1.2	low	1	140	68.5	176.4	yes	No	2.9	2.1	0.5	248	342.476	0.690476	1.38095	0.388322	Never	1500	active	No	No	9583.11	0.21723	0
94651	Female	57	Non-Hispanic White	High school diploma	Living alone	1.27	low	1	145	120.8	155.5	yes	No	4.8	1.6	0.5	154	462	1.5	3	0.776849	Former	7200	active	No	No	7988.62	1.21479	0
94652	Female	74	Non-Hispanic White	College diploma	Living alone	3.19	medium	2	138	86.4	142.9	yes	No	4	1.9	0.6	257	541.053	1.26316	2.10526	0.604619	Never	720	active	Yes	No	10581.1	0.200491	0
94654	Female	61	Non-Hispanic White	College diploma	Living alone	4.19	high	1	143	90.3	164	yes	No	2.4	2.4	0.8	217	217	0.8	1	0.55061	Never	7440	active	Yes	No	30184.1	0.405983	1
94663	Female	30	Other Race	College diploma	Married/living with partner	5	high	2	140	80.9	160.2	yes	No	4.1	1.8	0.6	269	612.722	1.36667	2.27778	0.504994	Never	5520	active	No	No	5485.61	0.209743	0
94664	Male	41	Other Race	College diploma	Married/living with partner	4.55	high	1	148	76.5	165.5	yes	No	2	2.4	0.3	310	258.333	0.25	0.833333	0.462236	Never	1920	active	No	No	1635.76	0.379735	0
94677	Female	25	Non-Hispanic White	High school diploma	Married/living with partner	1.91	medium	1	147	106.1	165.3	yes	No	4.1	2.4	0.5	254	433.917	0.854167	1.70833	0.641863	Never	19200	active	No	No	16214.8	0.422001	0
94686	Female	33	Non-Hispanic White	High school diploma	Married/living with partner	3.48	medium	1	137	97.7	172.5	yes	No	1.9	2	0.5	233	221.35	0.475	0.95	0.566377	Current	960	active	No	No	25241.3	0.620947	0
94688	Male	61	Non-Hispanic White	College diploma	Married/living with partner	5	high	2	143	110.6	168.9	yes	No	3.5	2.6	0.5	250	336.538	0.673077	1.34615	0.654825	Never	240	inactive	No	No	36690.6	0.500658	0
94695	Female	56	Non-Hispanic White	High school diploma	Married/living with partner	3.4	medium	2	142	74.4	165.4	yes	No	6.5	2.4	0.5	334	904.583	1.35417	2.70833	0.449819	Current	5040	active	No	No	35612.7	0.700666	0
94696	Female	43	Non-Hispanic White	College diploma	Married/living with partner	2.06	medium	2	142	79.2	158.4	yes	No	3.9	1.6	0.4	184	448.5	0.975	2.4375	0.5	Never	12000	active	Yes	No	5533.66	0.254839	0
94708	Male	41	Non-Hispanic White	College diploma	Married/living with partner	5	high	2	142	108.8	181.9	yes	No	3.3	1.7	0.4	258	500.824	0.776471	1.94118	0.598131	Never	6240	active	No	No	15307.6	0.351842	0
94711	Female	64	Non-Hispanic White	College diploma	Married/living with partner	2.17	medium	1	142	127.3	159.6	yes	No	4.9	1.6	0.7	162	496.125	2.14375	3.0625	0.797619	Former	10800	active	Yes	Yes	5782.35	1.69591	1
94726	Female	46	Non-Hispanic White	College diploma	Married/living with partner	5	high	2	141	101.7	169	yes	No	2.9	3.3	0.6	314	275.939	0.527273	0.878788	0.601775	Never	14400	active	Yes	Yes	20293.8	0.832779	0
94736	Male	51	Other Race	College diploma	Married/living with partner	3.88	high	2	138	75	167.4	no	No	4.5	1.1	0.6	270	1104.55	2.45455	4.09091	0.448029	Never	800	active	No	Yes	2265.99	0.601457	0
94748	Female	51	Non-Hispanic Non-Hispanic White	College diploma	Living alone	0	low	2	145	94.7	160.8	yes	No	4.6	1.1	0.5	288	1204.36	2.09091	4.18182	0.58893	Never	2160	active	Yes	No	2138.25	0.886601	0
94750	Male	80	Non-Hispanic White	<High school diploma	Married/living with partner	1.1	low	2	147	119.8	160.4	yes	No	5.1	1.6	0.7	152	484.5	2.23125	3.1875	0.746883	Former	0	inactive	Yes	Yes	2039.7	2.39404	0
94752	Male	73	Non-Hispanic White	High school diploma	Living alone	2.99	medium	1	134	104.2	173.4	yes	No	3.5	1.8	0.5	236	458.889	0.972222	1.94444	0.600923	Never	0	inactive	Yes	No	11831.4	0.200998	0
94754	Female	65	Non-Hispanic White	<High school diploma	Married/living with partner	5	high	2	139	112.5	155.6	no	No	6.2	2.4	0.7	252	651	1.80833	2.58333	0.723008	Never	0	inactive	Yes	Yes	12029.8	1.71873	0
94766	Male	42	Non-Hispanic Non-Hispanic White	College diploma	Married/living with partner	5	high	2	134	107.7	176.7	yes	No	1.1	1.7	0.3	254	164.353	0.194118	0.647059	0.609508	Never	3360	active	No	No	3541.42	0.261007	0
94773	Male	32	Mexican American	College diploma	Living alone	5	high	1	147	99.4	166.7	yes	No	3	2.3	0.6	203	264.783	0.782609	1.30435	0.596281	Never	2880	active	Yes	No	15093.8	0.800913	0
94775	Female	26	Non-Hispanic Non-Hispanic White	College diploma	Living alone	1.22	low	1	136	100.5	159.3	yes	No	3.6	1.9	0.4	250	473.684	0.757895	1.89474	0.630885	Never	960	active	No	No	5341.16	0.293056	0
94780	Male	74	Mexican American	College diploma	Married/living with partner	5	high	1	148	102.3	165.4	yes	No	3.1	2.4	1	129	166.625	1.29167	1.29167	0.618501	Former	0	inactive	Yes	No	5308.29	0.523851	0
94785	Male	55	Other Race	College diploma	Married/living with partner	3.08	medium	1	141	94.7	165	yes	No	2.9	1.3	0.5	149	332.385	1.11538	2.23077	0.573939	Never	4800	active	No	No	1582.37	0.250217	0
94786	Female	24	Non-Hispanic White	College diploma	Married/living with partner	2.79	medium	2	143	102.3	164.7	no	No	3.4	1.8	0.6	267	504.333	1.13333	1.88889	0.621129	Never	9840	active	No	No	13000.8	0.563251	0
94788	Female	53	Other Race	College diploma	Married/living with partner	5	high	2	146	76.4	158.2	yes	No	3.1	1.7	0.4	214	390.235	0.729412	1.82353	0.482933	Never	240	inactive	No	No	3505.42	0.181749	0
94812	Male	46	Other Race	College diploma	Married/living with partner	4.58	high	2	138	95.6	168	yes	No	2.8	2.8	0.5	234	234	0.5	1	0.569048	Current	1680	active	No	No	2491.54	1.3456	0
94819	Female	32	Mexican American	<High school diploma	Married/living with partner	1.14	low	1	148	84.3	153	yes	No	2.4	2.4	0.3	254	254	0.3	1	0.55098	Never	14000	active	No	No	2599.86	0.164175	0
94834	Female	62	Non-Hispanic White	College diploma	Married/living with partner	5	high	1	135	106.1	157.1	yes	No	3.9	3.6	0.6	256	277.333	0.65	1.08333	0.675366	Never	180	inactive	Yes	Yes	11084.6	0.557276	1
94861	Female	56	Non-Hispanic Non-Hispanic White	<High school diploma	Married/living with partner	1.79	medium	2	140	115.3	151.9	yes	No	4.5	3.6	0.6	234	292.5	0.75	1.25	0.759052	Current	4800	active	Yes	No	3023.31	0.710256	0
94879	Female	48	Other Race	College diploma	Married/living with partner	4.08	high	2	148	107.2	175.1	yes	No	2.2	2.7	0.4	255	207.778	0.325926	0.814815	0.612222	Former	440	inactive	No	No	1402.45	0.292704	0
94882	Female	55	Other Race	High school diploma	Living alone	1.1	low	1	138	82.7	158.3	yes	No	3.2	2	0.5	160	256	0.8	1.6	0.522426	Never	280	inactive	No	Yes	3698.8	0.0771825	0
94885	Male	64	Non-Hispanic Non-Hispanic White	College diploma	Married/living with partner	2.64	medium	1	144	130.3	182.2	yes	No	7	2.4	0.7	224	653.333	2.04167	2.91667	0.715148	Former	1440	active	Yes	Yes	1749.79	1.44925	1
94890	Male	57	Non-Hispanic White	<High school diploma	Married/living with partner	1.22	low	1	141	94.8	171.5	yes	No	2.7	1.7	0.6	228	362.118	0.952941	1.58824	0.55277	Former	0	inactive	No	No	40400.2	2.22869	0
94896	Female	50	Non-Hispanic Non-Hispanic White	<High school diploma	Married/living with partner	0.6	low	2	144	110.4	165.3	yes	No	3.3	2	0.5	308	508.2	0.825	1.65	0.667877	Never	11520	active	No	No	5684.39	0.579735	0
94899	Female	32	Non-Hispanic Non-Hispanic White	High school diploma	Married/living with partner	1.74	medium	1	147	97.3	161	yes	No	4.2	2.2	0.7	229	437.182	1.33636	1.90909	0.604348	Never	1440	active	No	No	4524.2	0.12087	0
94902	Female	67	Other Race	<High school diploma	Married/living with partner	4.07	high	2	137	85.4	152.1	no	No	3.8	2.1	0.4	282	510.286	0.72381	1.80952	0.561473	Never	120	inactive	No	Yes	1984.06	0.965321	0
94921	Female	61	Other Race	College diploma	Married/living with partner	4.72	high	2	138	97	151.1	yes	No	2.8	2.9	0.5	182	175.724	0.482759	0.965517	0.641959	Never	21360	active	Yes	No	1624.4	0.557163	0
94941	Male	28	Non-Hispanic Non-Hispanic White	College diploma	Living alone	2.83	medium	1	144	101.1	179.2	yes	No	2.5	1.4	0.5	185	330.357	0.892857	1.78571	0.564174	Never	4320	active	No	No	2936.32	0.23781	0
94945	Male	29	Mexican American	College diploma	Living alone	0.15	low	2	143	131.4	181.3	yes	No	4.1	1.4	0.6	369	1080.64	1.75714	2.92857	0.724766	Never	840	active	Yes	No	6032.62	0.851969	0
94946	Male	23	Non-Hispanic White	College diploma	Married/living with partner	1	low	2	141	132.5	188.5	yes	No	3.9	2.2	0.5	188	333.273	0.886364	1.77273	0.702918	Current	5040	active	No	Yes	9827.59	1.90449	0
94957	Male	43	Non-Hispanic White	College diploma	Living alone	2.99	medium	2	146	112.4	175.3	yes	No	4.8	2.8	0.8	242	414.857	1.37143	1.71429	0.641187	Former	1200	active	No	No	33101	0.819034	0
94966	Male	44	Other Race	<High school diploma	Married/living with partner	1.22	low	1	141	100.1	184.8	yes	No	4.2	2.2	0.7	253	483	1.33636	1.90909	0.541667	Former	800	active	Yes	Yes	4329.26	2.23383	0
94970	Male	55	Mexican American	<High school diploma	Living alone	1.98	medium	2	144	100.1	168.4	yes	No	3.9	1.8	0.4	183	396.5	0.866667	2.16667	0.594418	Current	0	inactive	Yes	No	3552.55	2.07279	0
94972	Female	39	Non-Hispanic White	High school diploma	Married/living with partner	1.5	medium	2	142	104.8	171.6	yes	No	4.7	2.3	1.1	339	692.739	2.24783	2.04348	0.610723	Current	8160	active	No	No	7331.87	0.93274	0
94986	Male	62	Non-Hispanic White	College diploma	Married/living with partner	5	high	1	142	111.5	158.7	yes	No	3.5	1.9	0.6	214	394.211	1.10526	1.84211	0.702583	Never	2400	active	Yes	No	21295.2	2.48423	1
94987	Female	63	Non-Hispanic White	High school diploma	Married/living with partner	2.19	medium	2	134	142.4	163.3	yes	No	9.8	2	0.5	341	1670.9	2.45	4.9	0.872015	Never	0	inactive	Yes	Yes	7016.07	2.31881	1
94993	Female	80	Non-Hispanic White	High school diploma	Married/living with partner	0.51	low	1	145	86.5	144.4	yes	No	5.3	1	0.5	204	1081.2	2.65	5.3	0.59903	Never	0	inactive	Yes	No	4166.42	0.239612	1
94998	Male	45	Non-Hispanic White	College diploma	Living alone	0.66	low	2	139	100.3	175.9	yes	No	4.3	2.2	1	267	521.864	1.95455	1.95455	0.57021	Never	0	inactive	No	No	5022.88	0.528251	0
95001	Female	80	Non-Hispanic White	College diploma	Living alone	1.4	medium	2	141	110.2	160.3	yes	No	4.1	1.9	0.8	221	476.895	1.72632	2.15789	0.687461	Former	0	inactive	Yes	Yes	3987.89	0.670766	0
95004	Male	80	Non-Hispanic White	High school diploma	Living alone	5	high	2	136	114.7	185.8	yes	No	3.3	1.2	0.6	177	486.75	1.65	2.75	0.61733	Former	0	inactive	Yes	No	6421.34	0.228678	1
95007	Male	79	Non-Hispanic White	<High school diploma	Married/living with partner	1.58	medium	2	143	90.3	162.1	yes	No	3.3	1.2	0.6	165	453.75	1.65	2.75	0.557064	Former	12960	active	No	No	2561.12	0.253699	0
95026	Male	20	Non-Hispanic Non-Hispanic White	College diploma	Living alone	0.25	low	1	146	77.5	185.1	no	No	4.1	2	0.5	204	418.2	1.025	2.05	0.418693	Never	9840	active	No	No	4323.47	0.16994	0
95029	Female	43	Non-Hispanic Non-Hispanic White	College diploma	Living alone	1.44	medium	2	140	106.3	165.5	yes	No	15.3	6	1.4	482	1229.1	3.57	2.55	0.642296	Never	880	active	Yes	No	3062.24	0.546431	0
95030	Male	63	Other Race	College diploma	Married/living with partner	1.3	medium	1	145	97.7	173.9	yes	No	2.6	3.1	0.7	259	217.226	0.587097	0.83871	0.561817	Former	480	inactive	Yes	No	1581.46	0.647236	0
95037	Female	20	Mexican American	High school diploma	Married/living with partner	1.11	low	2	141	107.4	163.9	yes	No	8.1	1.4	0.6	267	1544.79	3.47143	5.78571	0.655278	Never	1920	active	No	No	10368.5	1.02967	0
95044	Female	67	Non-Hispanic White	College diploma	Married/living with partner	4.56	high	2	139	122.3	158.9	yes	No	3.5	2.5	0.4	203	284.2	0.56	1.4	0.769666	Former	1080	active	Yes	No	1231.71	1.53267	1
95045	Female	69	Non-Hispanic White	College diploma	Married/living with partner	5	high	1	145	106	162.3	yes	No	5.6	2.6	0.8	259	557.846	1.72308	2.15385	0.653112	Never	2320	active	Yes	No	20129.7	0.537658	0
95048	Male	23	Non-Hispanic White	College diploma	Married/living with partner	4.62	high	1	143	87.8	176.8	yes	No	3	2.5	0.6	198	237.6	0.72	1.2	0.496606	Former	0	inactive	No	No	44805.9	1.00493	0
95051	Male	52	Non-Hispanic Non-Hispanic White	College diploma	Living alone	3.34	medium	2	143	145.4	184.1	yes	No	2.3	1.7	0.5	295	399.118	0.676471	1.35294	0.789788	Current	5760	active	Yes	Yes	3238.37	2.37814	0
95068	Female	80	Non-Hispanic White	<High school diploma	Living alone	2.9	medium	1	142	98.9	158.3	yes	No	9	2.2	0.9	275	1125	3.68182	4.09091	0.624763	Former	2400	active	Yes	Yes	5441.72	1.05038	0
95073	Female	71	Mexican American	High school diploma	Living alone	4.13	high	2	135	125	163.3	yes	No	4.9	1.2	0.5	183	747.25	2.04167	4.08333	0.765462	Former	2440	active	No	Yes	3698.57	1.30303	0
95083	Male	37	Non-Hispanic White	High school diploma	Married/living with partner	1.63	medium	1	145	140.2	171.3	yes	No	7.5	2.5	0.6	306	918	1.8	3	0.818447	Never	21600	active	Yes	No	13444.5	1.02531	0
95088	Female	50	Mexican American	College diploma	Married/living with partner	2.43	medium	1	135	100.6	148.9	no	No	2.5	2.1	0.5	213	253.571	0.595238	1.19048	0.675621	Never	5760	active	No	No	3500.5	1.84525	1
95091	Male	62	Non-Hispanic Non-Hispanic White	High school diploma	Living alone	0.95	low	1	146	94	167.5	yes	No	4.6	1.5	0.6	67	205.467	1.84	3.06667	0.561194	Current	400	inactive	Yes	No	2096.01	0.444004	0
95096	Male	21	Mexican American	College diploma	Living alone	2	medium	2	148	119.4	179.9	yes	No	3.2	3.6	0.6	255	226.667	0.533333	0.888889	0.663702	Never	4320	active	No	No	10690.5	0.423893	0
95097	Female	66	Non-Hispanic White	College diploma	Married/living with partner	5	high	2	147	100.6	161.4	no	No	2.3	1.5	0.3	228	349.6	0.46	1.53333	0.623296	Never	360	inactive	No	No	45416.5	0.337876	1
95099	Female	70	Other Race	High school diploma	Married/living with partner	3.86	high	1	148	74.6	150.6	yes	No	3.4	1.7	0.4	160	320	0.8	2	0.495352	Never	2400	active	No	No	3835.77	0.386055	1
95114	Male	34	Mexican American	College diploma	Married/living with partner	3.52	high	2	148	115.9	170.1	yes	No	4.1	1.7	0.6	191	460.647	1.44706	2.41176	0.681364	Never	480	inactive	No	No	7190.93	4.88824	0
95124	Male	58	Non-Hispanic Non-Hispanic White	<High school diploma	Living alone	2.14	medium	2	146	72	176.6	yes	No	2.1	1.5	0.6	196	274.4	0.84	1.4	0.407701	Current	3360	active	Yes	No	5932.36	0.962674	1
95131	Male	60	Non-Hispanic White	High school diploma	Married/living with partner	1.82	medium	2	139	102.4	178	no	No	2.3	2.3	0.6	212	212	0.6	1	0.575281	Never	0	inactive	No	No	4406.81	0.48203	0
95134	Male	37	Mexican American	High school diploma	Married/living with partner	0.33	low	2	137	101.1	172.3	yes	No	4.5	3.2	0.4	276	388.125	0.5625	1.40625	0.586767	Never	21520	active	No	No	9711.43	1.62073	0
95168	Female	59	Non-Hispanic Non-Hispanic White	College diploma	Married/living with partner	2.64	medium	1	144	90.5	172.8	yes	No	3.7	1.7	0.6	290	631.176	1.30588	2.17647	0.523727	Never	0	inactive	Yes	Yes	2282.47	0.706016	0
95189	Male	66	Non-Hispanic Non-Hispanic White	College diploma	Living alone	1.44	medium	2	143	111.6	169.4	yes	No	4.3	2.8	0.6	196	301	0.921429	1.53571	0.658796	Former	7680	active	Yes	No	1093.51	0.378519	0
95190	Female	28	Mexican American	College diploma	Living alone	1.66	medium	1	144	70.2	155.9	yes	Yes	2.6	1.7	0.5	212	324.235	0.764706	1.52941	0.450289	Former	9360	active	No	No	7801.18	0.0966652	0
95203	Male	54	Non-Hispanic Non-Hispanic White	College diploma	Living alone	1.59	medium	1	144	94.1	178.4	yes	No	6.3	1.2	0.7	229	1202.25	3.675	5.25	0.527466	Former	2400	active	Yes	No	2527.77	0.392027	0
95206	Male	47	Non-Hispanic Non-Hispanic White	College diploma	Married/living with partner	2.37	medium	2	134	76	165.8	yes	No	6	1.7	0.8	305	1076.47	2.82353	3.52941	0.458384	Never	0	inactive	No	No	3541.42	0.207676	0
95213	Male	25	Mexican American	<High school diploma	Living alone	5	high	1	148	80.4	170.8	yes	No	4.3	2.5	0.7	291	500.52	1.204	1.72	0.470726	Former	18480	active	No	No	7530.93	0.136216	0
95216	Male	50	Other Race	College diploma	Married/living with partner	4.93	high	2	134	90	172	yes	No	3.6	2	0.3	151	271.8	0.54	1.8	0.523256	Current	1960	active	Yes	No	3487.34	0.875219	0
95232	Female	23	Non-Hispanic Non-Hispanic White	<High school diploma	Married/living with partner	0.61	low	1	144	105	147.7	yes	No	2.4	1.9	0.4	256	323.368	0.505263	1.26316	0.7109	Never	13440	active	No	No	3841.18	0.220279	0
95233	Female	21	Mexican American	High school diploma	Living alone	1.22	low	2	140	108	157.5	yes	No	5.2	2.1	0.5	324	802.286	1.2381	2.47619	0.685714	Never	2400	active	No	No	4085.96	2.90011	0
95239	Female	23	Mexican American	High school diploma	Married/living with partner	0.48	low	2	136	102.8	155.9	no	No	3.7	2.4	0.7	252	388.5	1.07917	1.54167	0.659397	Never	3360	active	No	Yes	7340.37	1.22078	0
95247	Female	64	Other Race	College diploma	Married/living with partner	0.88	low	2	136	109.7	157.9	no	No	5.6	4.8	0.8	237	276.5	0.933333	1.16667	0.694744	Former	240	inactive	Yes	Yes	4001.22	1.0481	0
95257	Female	39	Non-Hispanic Non-Hispanic White	College diploma	Married/living with partner	3.47	medium	1	141	78.6	157.5	no	No	1.7	2.2	0.6	248	191.636	0.463636	0.772727	0.499048	Never	19200	active	No	No	3580.35	0.0938685	0
95262	Female	24	Other Race	High school diploma	Living alone	0.98	low	1	137	95.5	165.8	yes	No	4.1	2.2	0.5	229	426.773	0.931818	1.86364	0.575995	Never	0	inactive	No	No	7815.94	0.199655	0
95274	Female	48	Non-Hispanic White	<High school diploma	Married/living with partner	3.03	medium	2	142	128.2	162.9	yes	No	3.9	2	0.5	286	557.7	0.975	1.95	0.786986	Former	2400	active	Yes	Yes	31501.3	1.06438	0
95275	Female	41	Other Race	College diploma	Married/living with partner	5	high	2	147	80.7	160.9	yes	No	2.6	1.8	0.4	283	408.778	0.577778	1.44444	0.501554	Never	480	inactive	No	No	4628.7	0.425802	0
95276	Male	33	Non-Hispanic White	College diploma	Married/living with partner	5	high	2	147	110.5	180.1	yes	No	1.8	1.5	0.4	207	248.4	0.48	1.2	0.613548	Former	10560	active	No	No	36277.6	0.195298	0
95278	Female	43	Other Hispanic	<High school diploma	Married/living with partner	2.95	medium	2	146	105	168.1	yes	No	5.2	3	0.6	302	523.467	1.04	1.73333	0.624628	Never	0	inactive	No	Yes	3254.32	0.741268	0
95284	Female	41	Other Hispanic	College diploma	Married/living with partner	0.34	low	2	144	100.2	153.9	yes	No	4.9	2.6	0.5	278	523.923	0.942308	1.88462	0.651072	Never	0	inactive	No	No	1298.88	0.910306	0
95289	Female	56	Mexican American	College diploma	Living alone	3.95	high	2	143	102.1	147.6	yes	No	6.9	1.8	0.5	291	1115.5	1.91667	3.83333	0.691734	Never	10080	active	Yes	No	5849.04	0.347951	0
95296	Male	40	Other Race	College diploma	Married/living with partner	5	high	1	136	93.3	168.8	yes	No	3.2	2.6	0.6	207	254.769	0.738462	1.23077	0.552725	Never	3720	active	No	No	3983.67	0.927682	0
95302	Female	45	Mexican American	<High school diploma	Married/living with partner	2.79	medium	2	136	94.6	146.5	no	No	4.7	1.8	0.5	244	637.111	1.30556	2.61111	0.645734	Never	3600	active	Yes	No	2809.89	0.335351	0
95312	Male	25	Other Race	College diploma	Living alone	5	high	2	137	101.9	168.3	no	No	3.1	1.9	0.6	168	274.105	0.978947	1.63158	0.605466	Never	19200	active	No	No	4858.17	0.764926	0
95313	Female	54	Non-Hispanic White	College diploma	Married/living with partner	5	high	1	134	80.5	159.6	yes	No	3.8	1.2	0.4	255	807.5	1.26667	3.16667	0.504386	Never	2640	active	Yes	No	50163.5	0.0934048	0
95326	Male	72	Non-Hispanic White	College diploma	Married/living with partner	4.62	high	1	135	111	178	yes	No	5.2	3.2	0.7	257	417.625	1.1375	1.625	0.623596	Former	160	inactive	Yes	Yes	16087.8	4.78121	0
95342	Female	31	Non-Hispanic White	College diploma	Living alone	0.41	low	2	136	75	163.7	yes	No	3.2	1.6	0.6	216	432	1.2	2	0.458155	Never	8280	active	No	No	8463.98	0.124834	0
95353	Female	39	Mexican American	College diploma	Living alone	0.4	low	2	137	102.5	166.4	yes	No	4.2	2.8	0.5	234	351	0.75	1.5	0.615986	Current	360	inactive	No	No	4761.77	0.526877	0
95366	Female	44	Mexican American	College diploma	Married/living with partner	4.78	high	2	136	135.2	158.4	no	No	3.4	1.7	0.3	261	522	0.6	2	0.853535	Never	8640	active	No	No	1452.63	0.773779	0
95372	Male	80	Non-Hispanic White	<High school diploma	Married/living with partner	3.4	medium	2	141	114.6	179.5	yes	No	2.3	0.6	0.4	120	460	1.53333	3.83333	0.63844	Former	12480	active	Yes	Yes	3607.83	0.307893	0
95374	Male	27	Mexican American	<High school diploma	Married/living with partner	1.12	low	2	142	81.8	161.4	yes	No	3.7	3	0.6	145	178.833	0.74	1.23333	0.506815	Current	0	inactive	No	No	5644.61	0.329896	0
95382	Male	60	Non-Hispanic Non-Hispanic White	High school diploma	Married/living with partner	5	high	1	136	104.8	166.8	no	No	1.6	2.9	0.7	192	105.931	0.386207	0.551724	0.628297	Never	24480	active	Yes	No	2555.78	0.476888	0
95391	Female	44	Mexican American	<High school diploma	Living alone	0.01	low	2	136	89.5	145.5	yes	No	3.4	2.7	0.4	203	255.63	0.503704	1.25926	0.61512	Never	800	active	No	No	2271.03	0.373749	0
95393	Female	28	Other Race	College diploma	Married/living with partner	5	high	2	134	89.3	154.6	yes	No	6.3	2.8	0.6	321	722.25	1.35	2.25	0.57762	Never	1080	active	No	No	4239.61	0.656836	0
95394	Male	47	Mexican American	<High school diploma	Married/living with partner	1.96	medium	1	137	100.4	170.8	yes	No	5	1.6	0.8	183	571.875	2.5	3.125	0.587822	Current	0	inactive	No	No	7016.79	0.542341	0
95411	Male	71	Non-Hispanic Non-Hispanic White	College diploma	Married/living with partner	5	high	2	138	155.7	175.8	yes	No	5.6	1.5	0.5	232	866.133	1.86667	3.73333	0.885666	Former	0	inactive	Yes	Yes	1994.76	2.5514	1
95412	Male	60	Non-Hispanic Non-Hispanic White	High school diploma	Living alone	0.75	low	1	134	117	179.4	yes	No	4	3	0.8	245	326.667	1.06667	1.33333	0.652174	Current	0	inactive	Yes	No	1924.71	0.389081	1
95416	Female	36	Other Race	College diploma	Married/living with partner	5	high	1	148	67.5	162.3	yes	No	2.4	1.7	0.3	197	278.118	0.423529	1.41176	0.415896	Never	1640	active	No	No	3427.02	0.0992403	0
95418	Male	59	Non-Hispanic Non-Hispanic White	College diploma	Married/living with partner	2.37	medium	2	142	100	180.9	yes	No	5.2	1.2	0.6	349	1512.33	2.6	4.33333	0.552792	Never	0	inactive	Yes	No	6493.47	0.20663	1
95422	Female	39	Non-Hispanic White	College diploma	Married/living with partner	4.47	high	1	141	104.6	170.8	yes	No	4.6	1.9	0.5	274	663.368	1.21053	2.42105	0.612412	Former	1440	active	No	No	18941.5	0.191626	0
95431	Female	66	Non-Hispanic White	College diploma	Married/living with partner	1.62	medium	2	143	163.6	161.2	yes	No	4.9	1.4	0.6	170	595	2.1	3.5	1.01489	Former	8400	active	Yes	Yes	5384.14	2.23753	0
95436	Female	43	Mexican American	High school diploma	Married/living with partner	1.74	medium	1	137	80.7	156.5	yes	No	3.6	1.3	0.4	248	686.769	1.10769	2.76923	0.515655	Never	6000	active	No	No	3306.21	0.143978	0
95437	Male	23	Other Race	College diploma	Living alone	1.79	medium	2	135	96.8	168.6	no	No	2.4	1.5	0.3	216	345.6	0.48	1.6	0.57414	Never	0	inactive	No	No	2942.57	0.972246	0
95447	Female	70	Mexican American	High school diploma	Married/living with partner	1.7	medium	2	142	114.1	160.1	yes	No	3.3	2.1	0.3	120	188.571	0.471429	1.57143	0.71268	Never	0	inactive	Yes	Yes	2351.38	0.620649	0
95448	Male	80	Non-Hispanic White	High school diploma	Living alone	2.74	medium	1	140	120.1	165.4	yes	No	4.5	1.4	0.6	183	588.214	1.92857	3.21429	0.726119	Former	1920	active	Yes	Yes	9032.88	0.863062	1
95449	Male	55	Other Hispanic	<High school diploma	Married/living with partner	5	high	1	136	100	166.9	yes	No	4.4	2.6	0.6	188	318.154	1.01538	1.69231	0.599161	Never	960	active	Yes	No	5574.63	1.19992	0
95450	Male	38	Non-Hispanic Non-Hispanic White	High school diploma	Married/living with partner	0.6	low	2	144	77.6	176.4	yes	No	3.3	1.2	0.6	330	907.5	1.65	2.75	0.439909	Never	9600	active	Yes	No	5501.12	0.150048	0
95455	Male	47	Other Hispanic	<High school diploma	Living alone	1.24	low	2	141	108.6	162.7	yes	No	3.3	4.4	0.6	215	161.25	0.45	0.75	0.667486	Former	0	inactive	Yes	No	4569.84	0.943501	0
95459	Male	63	Mexican American	<High school diploma	Married/living with partner	1.94	medium	2	140	89.8	174.3	yes	No	4.2	2.3	0.7	207	378	1.27826	1.82609	0.515204	Never	13920	active	No	No	2271.33	0.556928	0
95465	Female	56	Mexican American	<High school diploma	Married/living with partner	1.45	medium	1	137	108	150	yes	No	3.8	2.3	0.5	216	356.87	0.826087	1.65217	0.72	Never	0	inactive	Yes	No	3582.56	0.589333	0
95467	Female	80	Non-Hispanic White	College diploma	Married/living with partner	1.48	medium	2	143	103.3	151.6	yes	No	7.2	1.1	0.8	242	1584	5.23636	6.54545	0.681398	Never	0	inactive	Yes	No	2507.28	0.615578	1
95468	Male	63	Non-Hispanic White	College diploma	Married/living with partner	5	high	1	142	95.9	181.9	yes	No	3.2	1	0.5	197	630.4	1.6	3.2	0.527213	Never	0	inactive	No	No	12776.7	0.529704	0
95469	Male	28	Non-Hispanic White	College diploma	Living alone	2.18	medium	2	147	77	177	yes	No	1.5	2.3	0.3	230	150	0.195652	0.652174	0.435028	Former	3120	active	No	No	69960.5	0.160782	0
95472	Male	34	Non-Hispanic White	College diploma	Living alone	5	high	1	144	92.4	172.6	yes	No	3.3	2.3	0.5	238	341.478	0.717391	1.43478	0.535342	Never	4320	active	Yes	No	32033.6	0.306958	0
95473	Male	36	Non-Hispanic White	<High school diploma	Married/living with partner	1.76	medium	2	141	83.5	184.1	yes	No	2.7	1.3	0.3	176	365.538	0.623077	2.07692	0.453558	Current	20880	active	No	No	20167	0.362229	0
95479	Female	57	Non-Hispanic White	College diploma	Married/living with partner	5	high	1	140	77.4	163.5	yes	No	3.1	1.4	0.4	199	440.643	0.885714	2.21429	0.473394	Former	12080	active	No	No	18435	0.140746	0
95486	Female	36	Non-Hispanic Non-Hispanic White	College diploma	Married/living with partner	4.08	high	2	145	92.1	167.9	yes	No	2.5	1.5	0.4	262	436.667	0.666667	1.66667	0.548541	Never	30240	active	Yes	No	8771.02	0.556838	0
95488	Female	21	Non-Hispanic White	<High school diploma	Married/living with partner	2.08	medium	1	146	126.8	163	yes	No	5.1	1.5	0.3	260	884	1.02	3.4	0.777914	Never	1680	active	No	Yes	15523	0.468657	0
95495	Male	75	Non-Hispanic White	College diploma	Living alone	1.49	medium	1	146	108.4	166.6	yes	No	4.9	2.2	0.6	276	614.727	1.33636	2.22727	0.65066	Former	0	inactive	No	No	1390.42	0.919634	0
95505	Male	29	Non-Hispanic White	College diploma	Married/living with partner	3.76	high	1	143	82.7	171	yes	No	5.3	1.1	0.9	179	862.455	4.33636	4.81818	0.483626	Current	7200	active	Yes	No	32013.6	0.213335	0
95506	Male	48	Other Race	College diploma	Married/living with partner	5	high	1	141	98.3	165.7	yes	No	7	3.3	0.6	295	625.758	1.27273	2.12121	0.593241	Current	4960	active	No	Yes	1976.28	0.47684	0
95508	Male	63	Non-Hispanic Non-Hispanic White	<High school diploma	Living alone	1.2	low	1	147	103.6	193.1	yes	No	3.1	1.8	0.7	234	403	1.20556	1.72222	0.53651	Former	960	active	Yes	No	1142.47	0.288328	0
95509	Female	51	Non-Hispanic White	College diploma	Married/living with partner	2.79	medium	2	135	95.5	165.2	yes	No	3.7	2	0.5	195	360.75	0.925	1.85	0.578087	Never	2400	active	Yes	No	12956.5	0.274845	0
95510	Female	51	Other Race	High school diploma	Married/living with partner	4.57	high	2	147	87	154.2	yes	No	3.2	1.4	0.5	134	306.286	1.14286	2.28571	0.564202	Never	0	inactive	Yes	No	2124.83	0.434982	0
95514	Male	35	Mexican American	High school diploma	Married/living with partner	2.52	medium	2	143	95.6	175.5	yes	No	2.9	1.6	0.4	183	331.688	0.725	1.8125	0.544729	Never	10560	active	No	No	11155.5	0.504645	0
95519	Female	53	Non-Hispanic White	College diploma	Living alone	1.41	medium	2	145	103.4	158.9	yes	No	5.5	1.3	0.6	322	1362.31	2.53846	4.23077	0.650724	Never	0	inactive	Yes	No	8409.14	0.476874	1
95531	Male	58	Non-Hispanic White	College diploma	Living alone	5	high	1	134	112.5	177.6	yes	No	3.3	1.9	0.6	192	333.474	1.04211	1.73684	0.633446	Former	3480	active	Yes	No	44345.9	0.273131	0
95547	Male	57	Other Race	High school diploma	Living alone	1.85	medium	1	137	91	172.1	yes	No	1.2	1.8	0.4	119	79.3333	0.266667	0.666667	0.528762	Current	3840	active	Yes	Yes	2742.72	0.329128	0
95550	Male	62	Non-Hispanic White	High school diploma	Married/living with partner	1.06	low	2	143	114.7	178.1	yes	No	5.9	2	0.5	311	917.45	1.475	2.95	0.64402	Former	600	active	Yes	Yes	9631.26	1.21444	0
95566	Female	78	Non-Hispanic White	<High school diploma	Living alone	1	low	1	139	125.8	166.8	no	No	7.3	2.5	0.6	320	934.4	1.752	2.92	0.754197	Never	1440	active	Yes	No	5178.67	0.801096	0
95575	Male	64	Non-Hispanic Non-Hispanic White	High school diploma	Living alone	3.29	medium	2	144	81.2	178.1	yes	No	5.4	1.8	0.5	190	570	1.5	3	0.455924	Former	0	inactive	Yes	No	2812.23	0.32302	0
95583	Female	69	Mexican American	High school diploma	Married/living with partner	2.46	medium	1	135	97.7	157.8	yes	No	4	2.7	0.6	254	376.296	0.888889	1.48148	0.619138	Former	0	inactive	No	No	3466.38	0.761448	1
95588	Male	72	Non-Hispanic Non-Hispanic White	<High school diploma	Living alone	1.82	medium	1	145	82.6	168.7	yes	No	3.2	2.5	0.9	262	335.36	1.152	1.28	0.489627	Never	0	inactive	Yes	No	1818.04	0.246149	0
95589	Female	63	Non-Hispanic Non-Hispanic White	High school diploma	Living alone	4.9	high	1	134	91.9	159.9	yes	No	2.8	2.5	0.3	194	217.28	0.336	1.12	0.574734	Never	9720	active	Yes	Yes	2550.09	0.33918	0
95590	Male	61	Other Hispanic	High school diploma	Married/living with partner	5	high	1	134	97.9	170.6	yes	No	6.5	1.6	0.7	204	828.75	2.84375	4.0625	0.573857	Former	11520	active	Yes	No	4675.96	0.975557	0
95591	Female	36	Other Race	College diploma	Married/living with partner	4.62	high	2	140	73.9	150.3	yes	No	3.2	2.2	0.3	236	343.273	0.436364	1.45455	0.491683	Never	4320	active	No	No	2949.41	0.109892	0
95599	Male	47	Non-Hispanic White	College diploma	Living alone	1.48	medium	2	142	112.2	186	yes	No	5.2	1.6	0.6	196	637	1.95	3.25	0.603226	Former	14160	active	No	No	29472.8	0.29039	0
95602	Male	21	Mexican American	High school diploma	Married/living with partner	1.11	low	2	136	105.4	168.1	yes	No	6.2	2.3	0.7	256	690.087	1.88696	2.69565	0.627008	Former	8640	active	No	No	7304.5	7.01245	0
95611	Male	53	Other Race	High school diploma	Living alone	0.25	low	1	135	76.1	177.2	yes	No	2.9	1.3	0.5	229	510.846	1.11538	2.23077	0.429458	Current	10200	active	No	No	9999.57	0.277942	0
95622	Female	42	Non-Hispanic White	<High school diploma	Married/living with partner	2.56	medium	1	138	81.8	167.4	yes	No	4.5	2.1	0.5	279	597.857	1.07143	2.14286	0.48865	Current	17840	active	No	No	20383	0.234844	0
95625	Male	43	Other Race	College diploma	Married/living with partner	4.08	high	2	148	82.6	177.2	yes	No	2.9	1.9	0.4	205	312.895	0.610526	1.52632	0.46614	Former	3840	active	No	No	1914.38	0.0796709	0
95626	Male	76	Mexican American	<High school diploma	Living alone	0.94	low	2	136	118.5	159	yes	No	5.1	2.1	0.6	227	551.286	1.45714	2.42857	0.745283	Former	0	inactive	Yes	Yes	1460.06	1.14036	0
95633	Female	64	Mexican American	College diploma	Living alone	2.63	medium	2	135	97.1	157.9	yes	No	3.4	1.6	0.4	178	378.25	0.85	2.125	0.614946	Never	10080	active	Yes	Yes	1883.69	0.852833	0
95655	Male	22	Non-Hispanic White	College diploma	Living alone	2.79	medium	2	135	113.6	183.6	yes	No	3.5	2.3	0.6	216	328.696	0.913043	1.52174	0.618736	Never	1200	active	No	No	20954.2	0.869733	0
95656	Male	78	Other Race	<High school diploma	Living alone	1.69	medium	2	135	118.5	167.2	yes	No	2.8	1.5	0.7	169	315.467	1.30667	1.86667	0.708732	Former	0	inactive	Yes	Yes	1578.64	0.596613	1
95658	Male	29	Non-Hispanic White	College diploma	Married/living with partner	5	high	2	142	94.4	188.4	yes	No	2.6	1.3	0.5	172	344	1	2	0.501062	Never	11760	active	No	No	13766.8	0.671423	0
95664	Male	47	Non-Hispanic White	College diploma	Married/living with partner	1.08	low	1	140	115.2	188	yes	No	2.4	3	0.8	245	196	0.64	0.8	0.612766	Current	16800	active	No	No	5040.84	1.05359	0
95665	Male	23	Non-Hispanic White	College diploma	Living alone	1.24	low	1	146	93.5	175.7	yes	No	3.9	2.2	0.6	268	475.091	1.06364	1.77273	0.532157	Never	11160	active	No	No	17264.1	0.499112	0
95668	Female	68	Mexican American	College diploma	Married/living with partner	0.69	low	2	137	107.2	165.6	yes	No	2.6	1.9	0.4	206	281.895	0.547368	1.36842	0.647343	Former	5400	active	No	No	3595.89	0.514116	1
95671	Female	66	Mexican American	College diploma	Married/living with partner	4	high	1	136	98.3	151.8	yes	No	2.9	1.2	0.4	249	601.75	0.966667	2.41667	0.647563	Former	10800	active	No	No	3076.98	0.419097	1
95673	Male	80	Non-Hispanic Non-Hispanic White	High school diploma	Married/living with partner	2.77	medium	1	147	89.4	166.2	yes	No	6	2.2	0.6	214	583.636	1.63636	2.72727	0.537906	Current	3360	active	Yes	No	1072.84	0.438913	0
95674	Male	49	Non-Hispanic Non-Hispanic White	College diploma	Living alone	5	high	1	141	103.7	185.4	yes	No	3.8	2	0.5	203	385.7	0.95	1.9	0.559331	Never	9600	active	Yes	Yes	4826.35	0.631685	0
95681	Female	80	Non-Hispanic White	College diploma	Living alone	4.07	high	2	142	103.7	155.9	yes	No	5.8	2.3	0.6	214	539.652	1.51304	2.52174	0.66517	Never	0	inactive	Yes	No	9423.27	1.09592	1
95685	Male	30	Non-Hispanic White	High school diploma	Married/living with partner	0.91	low	1	135	134.9	170.4	yes	No	4.6	1.9	0.7	291	704.526	1.69474	2.42105	0.791667	Former	2880	active	No	No	8785.8	1.2477	0
95690	Male	54	Other Race	High school diploma	Married/living with partner	1.97	medium	1	144	93.7	169.4	yes	No	3.1	5.1	0.6	209	127.039	0.364706	0.607843	0.553129	Current	0	inactive	Yes	Yes	1429.61	2.84223	0
95699	Female	22	Non-Hispanic Non-Hispanic White	College diploma	Living alone	1.79	medium	2	140	74.9	160.8	yes	No	1.9	1.9	0.3	262	262	0.3	1	0.465796	Never	3840	active	No	No	857.357	0.167181	0
95708	Male	52	Non-Hispanic White	<High school diploma	Married/living with partner	5	high	1	134	117.1	185.5	yes	No	3.8	1.9	0.5	197	394	1	2	0.631267	Former	19200	active	No	No	4994.71	0.878332	0
95714	Female	63	Non-Hispanic Non-Hispanic White	College diploma	Married/living with partner	5	high	1	144	138.3	163.5	yes	No	3.1	1.8	0.4	224	385.778	0.688889	1.72222	0.845872	Never	0	inactive	Yes	Yes	1472.96	0.342136	1
95718	Male	63	Non-Hispanic White	<High school diploma	Living alone	1.22	low	2	139	97.4	172.5	yes	No	5.2	2.6	1.1	194	388	2.2	2	0.564638	Current	1680	active	Yes	No	2813.63	0.817659	0
95719	Male	22	Non-Hispanic White	College diploma	Married/living with partner	1.35	medium	2	141	75.2	173	yes	No	2.8	2.1	0.4	240	320	0.533333	1.33333	0.434682	Former	3600	active	No	No	7260.65	0.247294	0
95720	Female	59	Non-Hispanic White	College diploma	Married/living with partner	3.22	medium	2	135	86	167.8	yes	No	1.9	1.4	0.2	197	267.357	0.271429	1.35714	0.512515	Former	1360	active	No	No	1100.81	0.143352	1
95723	Female	80	Non-Hispanic White	College diploma	Married/living with partner	1.85	medium	1	136	102.2	152.9	yes	No	3	1.5	0.5	218	436	1	2	0.668411	Never	0	inactive	Yes	No	3722.54	0.198393	1
95725	Male	70	Non-Hispanic White	<High school diploma	Married/living with partner	2.03	medium	1	145	135.5	184.1	yes	No	4.6	1.3	0.6	211	746.615	2.12308	3.53846	0.736013	Former	720	active	Yes	Yes	5402.64	0.755905	0
95726	Female	32	Non-Hispanic Non-Hispanic White	College diploma	Married/living with partner	0.99	low	1	143	89.5	167.5	yes	No	1.4	1.9	0.3	227	167.263	0.221053	0.736842	0.534328	Never	960	active	No	No	8223.38	0.15168	0
95744	Female	57	Other Race	College diploma	Married/living with partner	5	high	2	134	84.9	160.1	yes	No	3.4	1.9	0.7	279	499.263	1.25263	1.78947	0.530294	Never	1920	active	No	No	2734.42	0.247592	0
95748	Male	43	Non-Hispanic Non-Hispanic White	College diploma	Married/living with partner	5	high	1	136	95.9	180.9	no	No	5	1.7	0.6	180	529.412	1.76471	2.94118	0.530127	Never	1520	active	No	No	5063.3	0.447712	0
95752	Male	80	Other Hispanic	<High school diploma	Married/living with partner	1.45	medium	1	140	94.4	168.1	yes	No	5.1	1.3	0.5	170	666.923	1.96154	3.92308	0.56157	Never	0	inactive	No	No	2906.27	0.601424	0
95761	Male	51	Other Hispanic	College diploma	Living alone	3.34	medium	2	141	82	162.1	yes	No	3.8	2	0.6	219	416.1	1.14	1.9	0.505861	Never	43680	active	No	No	4273.83	0.525034	0
95762	Male	32	Non-Hispanic Non-Hispanic White	College diploma	Married/living with partner	0.99	low	1	143	101.1	183.6	yes	No	2.9	2	0.5	219	317.55	0.725	1.45	0.550654	Never	30240	active	No	No	9711.56	1.14176	0
95763	Male	75	Non-Hispanic White	<High school diploma	Living alone	1.03	low	2	147	113	169.8	yes	No	8.1	1	0.9	245	1984.5	7.29	8.1	0.665489	Former	11760	active	Yes	Yes	1501.26	0.484626	0
95768	Male	23	Other Hispanic	College diploma	Living alone	3.19	medium	2	138	81.6	163.5	yes	No	2.3	2	0.6	363	417.45	0.69	1.15	0.499083	Former	28440	active	Yes	No	13107.2	0.230542	0
95772	Female	64	Other Race	College diploma	Living alone	3.13	medium	2	142	98.9	157.1	yes	No	4	2.6	0.4	317	487.692	0.615385	1.53846	0.629535	Never	3360	active	Yes	Yes	1947.26	0.958611	0
95780	Female	78	Mexican American	High school diploma	Married/living with partner	1.97	medium	1	136	92.4	151.4	yes	No	4.9	1.4	0.5	164	574	1.75	3.5	0.610304	Former	480	inactive	Yes	No	4401.09	0.873366	1
95785	Male	51	Non-Hispanic White	College diploma	Married/living with partner	0.28	low	1	145	95.4	172.9	yes	No	3.1	2.1	0.7	185	273.095	1.03333	1.47619	0.551764	Current	3000	active	Yes	No	3841.22	0.901215	1
95791	Male	33	Other Hispanic	<High school diploma	Married/living with partner	0.25	low	2	140	112.2	160.5	yes	No	9	2.6	0.7	212	733.846	2.42308	3.46154	0.699065	Never	960	active	No	No	4284.68	1.19198	0
95792	Male	23	Non-Hispanic White	College diploma	Living alone	2.49	medium	1	139	92.5	172.5	yes	No	2.9	2.9	0.5	315	315	0.5	1	0.536232	Never	12000	active	No	No	26101.4	0.72503	0
95793	Female	26	Mexican American	<High school diploma	Living alone	0	low	2	142	72.6	150.7	yes	No	2.4	2.3	0.3	329	343.304	0.313043	1.04348	0.481752	Never	0	inactive	No	No	5734.84	0.451897	0
95794	Male	63	Other Race	College diploma	Married/living with partner	3.39	medium	1	136	83.2	170.9	yes	No	6.2	2.8	1	306	677.571	2.21429	2.21429	0.486834	Current	480	inactive	Yes	Yes	2266.95	0.314124	0
95799	Female	25	Non-Hispanic White	College diploma	Married/living with partner	1.63	medium	1	142	88.5	168	yes	No	4.1	1.5	0.4	225	615	1.09333	2.73333	0.526786	Former	0	inactive	No	No	11036.2	0.0781026	0
95802	Male	68	Non-Hispanic White	College diploma	Living alone	2.43	medium	2	145	100.8	173.1	yes	No	6.2	2.4	0.7	257	663.917	1.80833	2.58333	0.582322	Former	1680	active	Yes	Yes	32870.8	1.07314	0
95803	Male	38	Non-Hispanic White	College diploma	Married/living with partner	5	high	2	141	102.8	180	yes	No	3.5	1.4	0.7	152	380	1.75	2.5	0.571111	Never	360	inactive	Yes	No	17049.8	1.63036	0
95809	Female	59	Other Hispanic	<High school diploma	Living alone	1.59	medium	1	134	101.9	157	yes	No	2.8	0.7	0.4	54	216	1.6	4	0.649045	Former	240	inactive	Yes	Yes	3928.67	0.498087	0
95812	Female	63	Non-Hispanic Non-Hispanic White	College diploma	Living alone	1.35	medium	1	144	87.1	171.6	no	No	1.4	2.1	0.3	175	116.667	0.2	0.666667	0.507576	Never	2800	active	No	No	2410.41	0.148298	0
95828	Male	80	Non-Hispanic Non-Hispanic White	College diploma	Living alone	3.23	medium	1	143	98.6	169.3	yes	No	1.8	1.2	0.5	383	574.5	0.75	1.5	0.582398	Never	960	active	Yes	No	3346.65	0.153513	0
95831	Female	63	Other Race	College diploma	Married/living with partner	5	high	1	138	110	159.3	no	No	3.2	1.7	0.3	208	391.529	0.564706	1.88235	0.690521	Never	5852	active	Yes	Yes	2993.83	0.825724	0
95851	Male	28	Mexican American	College diploma	Married/living with partner	1.2	low	2	147	97.3	165.5	yes	No	5.2	2	0.6	314	816.4	1.56	2.6	0.587915	Never	12480	active	No	No	6901.28	0.849899	0
95866	Female	80	Mexican American	High school diploma	Living alone	2.32	medium	1	137	102	160.7	yes	No	3.2	1.2	0.3	142	378.667	0.8	2.66667	0.634723	Former	15360	active	Yes	No	4442.24	0.252004	1
95870	Female	20	Non-Hispanic Non-Hispanic White	High school diploma	Living alone	0.74	low	1	143	107.8	168.7	yes	No	6.5	2.6	1	224	560	2.5	2.5	0.639004	Never	0	inactive	No	No	13512.2	0.663183	0
95873	Male	76	Non-Hispanic White	High school diploma	Living alone	1.22	low	2	147	100.7	165.8	yes	No	6.9	2.6	0.6	193	512.192	1.59231	2.65385	0.607358	Former	9600	active	Yes	Yes	1617.91	0.963956	1
95881	Female	64	Mexican American	College diploma	Living alone	3.29	medium	2	137	85.3	158.4	yes	No	2.4	2.4	0.4	292	292	0.4	1	0.53851	Former	2992	active	Yes	No	4063.56	0.18761	1
95883	Female	31	Mexican American	College diploma	Living alone	4.56	high	1	135	143.6	167.6	yes	No	7.2	3.3	0.7	383	835.636	1.52727	2.18182	0.856802	Current	660	active	No	No	12929.6	1.64247	0
95900	Male	31	Non-Hispanic White	College diploma	Living alone	4.56	high	1	147	101.5	180.7	yes	No	5.4	2.5	0.6	209	451.44	1.296	2.16	0.561704	Never	960	active	No	No	21239.9	0.218546	0
95902	Female	61	Non-Hispanic Non-Hispanic White	<High school diploma	Married/living with partner	2.37	medium	2	134	106	153.7	yes	No	3.6	3	0.6	277	332.4	0.72	1.2	0.689655	Never	0	inactive	Yes	No	1742.02	0.711377	0
95903	Male	21	Mexican American	High school diploma	Living alone	1.29	low	2	144	94	173.2	yes	No	2.5	1.4	0.4	232	414.286	0.714286	1.78571	0.542725	Never	25440	active	No	No	15911.8	0.536783	0
95904	Female	53	Other Race	College diploma	Living alone	5	high	1	136	88.9	165.1	yes	No	2	2.5	0.4	274	219.2	0.32	0.8	0.538462	Never	960	active	No	No	3006.3	0.189406	0
95913	Female	80	Non-Hispanic White	College diploma	Married/living with partner	5	high	1	144	74.6	163.6	yes	No	2.7	1.6	0.4	220	371.25	0.675	1.6875	0.45599	Never	2460	active	Yes	No	6829.95	0.0815255	1
95915	Male	57	Non-Hispanic White	College diploma	Living alone	4.48	high	1	145	123.4	169.8	yes	No	4.2	2.7	1	252	392	1.55556	1.55556	0.726737	Former	10560	active	Yes	No	12731.6	2.50793	0
95919	Male	47	Non-Hispanic White	College diploma	Married/living with partner	0.63	low	1	142	149	182.2	yes	No	7	2.8	0.9	238	595	2.25	2.5	0.817783	Former	1840	active	Yes	No	3346.34	1.8251	0
95922	Male	25	Non-Hispanic White	High school diploma	Married/living with partner	3.31	medium	1	138	90.1	174.4	yes	No	3	1.9	0.4	291	459.474	0.631579	1.57895	0.516628	Former	30240	active	No	No	56054.5	0.15632	0
95945	Female	70	Non-Hispanic White	College diploma	Living alone	1.2	low	1	139	100	154	yes	No	4.8	2.9	0.5	264	436.966	0.827586	1.65517	0.649351	Never	180	inactive	Yes	No	4891.83	0.400217	1
95950	Male	45	Non-Hispanic White	College diploma	Living alone	1.78	medium	1	140	85	181.5	yes	No	2.7	2.5	0.6	258	278.64	0.648	1.08	0.46832	Current	6000	active	No	No	18640.7	0.13468	1
95955	Female	22	Non-Hispanic White	High school diploma	Living alone	1.47	medium	1	145	125.1	164	yes	No	6.1	1.5	0.6	245	996.333	2.44	4.06667	0.762805	Never	8400	active	No	No	14552.7	0.270673	0
95968	Female	49	Other Race	College diploma	Living alone	1.67	medium	1	148	71	157.5	yes	No	4.3	0.9	0.4	314	1500.22	1.91111	4.77778	0.450794	Former	720	active	No	No	2765.15	0.110738	0
95977	Female	26	Non-Hispanic Non-Hispanic White	College diploma	Married/living with partner	0.31	low	1	144	81.3	178.4	yes	No	3.2	1.2	0.7	309	824	1.86667	2.66667	0.455717	Current	42000	active	No	No	3667.78	0.113839	0
95988	Male	80	Non-Hispanic White	<High school diploma	Married/living with partner	1.91	medium	1	142	119	171.1	yes	No	3.1	2.7	0.6	198	227.333	0.688889	1.14815	0.6955	Never	0	inactive	Yes	No	4690.4	0.417702	0
95990	Female	28	Non-Hispanic White	College diploma	Married/living with partner	3.28	medium	1	135	79.6	167.5	yes	No	6.3	1.3	0.8	104	504	3.87692	4.84615	0.475224	Former	1560	active	No	No	10606.3	0.210129	0
95991	Male	43	Other Race	College diploma	Married/living with partner	1.67	medium	2	148	95.5	174.4	yes	No	3	2.4	0.5	210	262.5	0.625	1.25	0.547592	Never	0	inactive	No	Yes	3400.07	0.875114	0
95992	Female	79	Non-Hispanic White	College diploma	Living alone	1.07	low	2	137	108.7	158.2	yes	No	4.5	1.8	0.9	178	445	2.25	2.5	0.687105	Former	1920	active	Yes	Yes	4214.12	0.674151	1
96008	Male	52	Non-Hispanic Non-Hispanic White	College diploma	Living alone	5	high	1	147	99.3	178.8	yes	No	2.7	2.1	0.5	185	237.857	0.642857	1.28571	0.555369	Former	24720	active	No	No	3390.75	0.137719	0
96031	Female	24	Other Hispanic	College diploma	Married/living with partner	2.43	medium	2	140	79.8	170.9	yes	No	5.1	2	0.9	202	515.1	2.295	2.55	0.46694	Never	14560	active	No	No	5938.06	0.146107	0
96037	Male	60	Non-Hispanic White	College diploma	Living alone	0.69	low	1	140	144.3	173.4	yes	No	4.2	1.7	0.5	160	395.294	1.23529	2.47059	0.83218	Former	0	inactive	Yes	Yes	3888.3	1.16016	0
96044	Female	61	Non-Hispanic Non-Hispanic White	College diploma	Married/living with partner	3.69	high	1	147	129.8	163.6	yes	No	3.4	3.4	0.5	267	267	0.5	1	0.793399	Never	160	inactive	Yes	Yes	2181.74	1.22655	0
96049	Male	69	Other Hispanic	College diploma	Married/living with partner	1.4	medium	2	138	102.6	165.1	yes	No	3.9	2	0.6	157	306.15	1.17	1.95	0.621442	Former	14080	active	Yes	No	2893.24	0.207805	0
96050	Female	46	Non-Hispanic White	College diploma	Married/living with partner	3.1	medium	1	146	98.5	164.8	yes	No	5.6	1.2	0.4	198	924	1.86667	4.66667	0.597694	Never	3280	active	Yes	No	10855.2	0.164442	0
96064	Male	49	Other Race	College diploma	Living alone	5	high	2	136	87.8	174.4	yes	No	2	1.6	0.4	312	390	0.5	1.25	0.50344	Former	1080	active	No	No	1940.13	0.61132	0
96074	Female	34	Non-Hispanic White	College diploma	Married/living with partner	4.78	high	2	143	120.7	171.4	yes	No	4.5	2.1	0.3	372	797.143	0.642857	2.14286	0.704201	Former	1920	active	Yes	No	18945.7	0.268786	0
96082	Male	37	Non-Hispanic White	College diploma	Married/living with partner	3.56	high	2	142	124.1	189.3	yes	No	2.8	1.8	0.6	307	477.556	0.933333	1.55556	0.655573	Never	0	inactive	No	No	29510.9	0.855428	0
96085	Male	25	Non-Hispanic White	<High school diploma	Married/living with partner	0.51	low	2	146	104	179.4	yes	No	4.6	4	1	195	224.25	1.15	1.15	0.57971	Never	5760	active	No	No	10435.5	2.14493	0
96086	Male	65	Non-Hispanic White	High school diploma	Married/living with partner	3.08	medium	1	138	117	172.9	yes	No	5	1.7	0.7	159	467.647	2.05882	2.94118	0.676692	Former	11280	active	Yes	Yes	18171.4	1.95894	1
96093	Female	20	Non-Hispanic White	High school diploma	Married/living with partner	0.21	low	1	140	101.1	156.8	yes	No	5.7	3.5	1.2	251	408.771	1.95429	1.62857	0.64477	Never	9600	active	No	No	16385	0.414594	0
96112	Male	73	Non-Hispanic White	College diploma	Living alone	1.49	medium	1	145	132.8	167.7	yes	No	4.5	1.3	0.6	187	647.308	2.07692	3.46154	0.79189	Former	0	inactive	No	Yes	1815.79	2.80897	0
96124	Female	52	Other Race	High school diploma	Living alone	0.08	low	2	138	101.2	156.5	yes	No	3.9	1.6	0.5	255	621.562	1.21875	2.4375	0.646645	Never	0	inactive	No	Yes	5139.28	0.719031	0
96133	Male	32	Non-Hispanic Non-Hispanic White	College diploma	Married/living with partner	2.11	medium	1	144	132.6	185.2	yes	No	2	2.5	0.4	202	161.6	0.32	0.8	0.715983	Never	2640	active	Yes	No	4862.78	0.556354	0
96147	Male	31	Non-Hispanic White	College diploma	Living alone	4.61	high	2	142	90.3	184.2	yes	No	2.6	1.8	0.4	228	329.333	0.577778	1.44444	0.490228	Never	21360	active	No	No	21087.2	0.243956	0
96149	Female	63	Other Race	College diploma	Married/living with partner	5	high	2	138	91.8	153.6	yes	No	2.4	1.8	0.3	243	324	0.4	1.33333	0.597656	Current	1120	active	No	Yes	1624.4	0.79159	0
96150	Male	23	Non-Hispanic White	College diploma	Living alone	1.66	medium	1	146	74	174.5	yes	No	2.2	0.9	0.5	267	652.667	1.22222	2.44444	0.424069	Never	2880	active	Yes	No	13931	0.146993	0
96160	Female	58	Mexican American	College diploma	Married/living with partner	4.86	high	2	148	92.7	163.6	yes	No	3.2	1.9	0.4	151	254.316	0.673684	1.68421	0.566626	Never	12960	active	No	No	3964.38	0.682218	1
96162	Female	60	Other Hispanic	<High school diploma	Living alone	1.06	low	1	142	104	163	yes	No	2.1	0.8	0.3	144	378	0.7875	2.625	0.638037	Never	0	inactive	No	No	1458.65	1.12699	0
96171	Female	80	Non-Hispanic White	College diploma	Living alone	1.58	medium	2	146	111.6	153.5	yes	No	5.5	2.4	0.8	251	575.208	1.83333	2.29167	0.727036	Never	0	inactive	No	No	6590.24	0.741577	0
96178	Male	63	Non-Hispanic Non-Hispanic White	College diploma	Married/living with partner	5	high	1	139	96.4	179.1	yes	No	2.3	1.2	0.6	214	410.167	1.15	1.91667	0.538247	Never	0	inactive	Yes	No	1809.43	0.551892	0
96185	Female	75	Non-Hispanic White	College diploma	Married/living with partner	2.79	medium	1	141	112.7	149.1	yes	No	4.2	2.9	0.7	311	450.414	1.01379	1.44828	0.755869	Never	7200	active	Yes	Yes	14665.1	0.624941	1
96196	Female	34	Non-Hispanic White	<High school diploma	Living alone	0.89	low	2	146	154.9	163.2	yes	No	4.2	1.7	0.3	358	884.471	0.741176	2.47059	0.949142	Never	4080	active	No	No	8377.59	0.920834	0
96198	Female	29	Non-Hispanic Non-Hispanic White	College diploma	Living alone	0.73	low	2	148	69.5	161.5	yes	No	2.3	1.8	0.5	205	261.944	0.638889	1.27778	0.430341	Never	240	inactive	No	No	3535.43	0.168319	0
96205	Male	52	Non-Hispanic Non-Hispanic White	High school diploma	Married/living with partner	2.62	medium	1	146	98	178.3	yes	No	1	2.6	0.4	130	50	0.153846	0.384615	0.549635	Never	0	inactive	No	No	3999.98	0.41507	0
96222	Female	40	Non-Hispanic White	College diploma	Living alone	0.73	low	1	146	88.9	161.4	yes	No	3.7	2.3	0.5	273	439.174	0.804348	1.6087	0.550805	Current	0	inactive	No	No	8083.21	0.195567	1
96223	Male	70	Non-Hispanic Non-Hispanic White	College diploma	Married/living with partner	1.48	medium	2	145	85	171.9	yes	No	4.7	1.4	0.7	248	832.571	2.35	3.35714	0.494474	Current	8940	active	Yes	Yes	1976.74	0.380688	0
96224	Female	59	Non-Hispanic White	College diploma	Married/living with partner	1.23	low	1	142	88	166.5	no	No	2.2	1.9	0.5	250	289.474	0.578947	1.15789	0.528529	Never	2768	active	No	No	11696.7	0.311595	0
96226	Male	31	Non-Hispanic Non-Hispanic White	College diploma	Married/living with partner	2.89	medium	2	146	99.7	175.3	yes	No	2.5	2.6	0.8	189	181.731	0.769231	0.961538	0.568739	Current	30240	active	No	No	4115.15	0.134193	0
96236	Female	78	Non-Hispanic Non-Hispanic White	High school diploma	Living alone	1.02	low	2	145	81.9	156	yes	No	3.2	2.2	0.4	311	452.364	0.581818	1.45455	0.525	Never	480	inactive	Yes	Yes	2939.97	0.311662	0
96237	Female	58	Non-Hispanic White	High school diploma	Living alone	1.37	medium	1	140	89.3	160.8	yes	No	6.8	1.8	0.7	267	1008.67	2.64444	3.77778	0.555348	Current	0	inactive	Yes	No	7080.1	0.197105	0
96244	Female	38	Mexican American	<High school diploma	Married/living with partner	0.33	low	2	137	84	151.6	yes	No	8.2	1.9	0.4	263	1135.05	1.72632	4.31579	0.55409	Never	2400	active	Yes	No	3361.98	0.373281	0
96245	Female	60	Mexican American	<High school diploma	Married/living with partner	5	high	2	136	102.4	155.6	yes	No	4.3	5.6	0.8	345	264.911	0.614286	0.767857	0.658098	Never	960	active	Yes	Yes	1822.16	0.779103	0
96250	Male	42	Non-Hispanic White	College diploma	Married/living with partner	5	high	2	141	106.1	172.6	yes	No	3.1	1.5	0.3	293	605.533	0.62	2.06667	0.614716	Former	0	inactive	No	No	36669.7	0.403616	0
96253	Female	47	Non-Hispanic White	College diploma	Married/living with partner	3.98	high	2	136	114.3	176.7	yes	No	3	1.5	0.4	303	606	0.8	2	0.646859	Never	1800	active	No	No	25758.2	0.400635	0
96257	Female	32	Mexican American	<High school diploma	Living alone	1.42	medium	1	147	94.6	155.1	yes	No	5.9	2.6	0.5	427	968.962	1.13462	2.26923	0.609929	Never	0	inactive	No	Yes	2615.04	0.960219	0
96265	Male	66	Non-Hispanic Non-Hispanic White	<High school diploma	Living alone	0.74	low	1	147	99.5	166.7	yes	No	4.4	2.9	0.7	274	415.724	1.06207	1.51724	0.596881	Current	12660	active	Yes	Yes	1227.57	0.778467	0
96269	Female	33	Mexican American	<High school diploma	Married/living with partner	0.49	low	2	148	96.5	148.9	no	No	4.1	2.1	0.5	259	505.667	0.97619	1.95238	0.648086	Never	0	inactive	No	No	2692.45	0.635868	0
96270	Male	25	Other Hispanic	College diploma	Married/living with partner	2.32	medium	1	138	88.8	180	yes	No	2.3	2.1	0.3	215	235.476	0.328571	1.09524	0.493333	Never	3840	active	No	No	9865.51	0.220011	0
96271	Male	70	Other Race	College diploma	Married/living with partner	3.65	high	2	148	88	159.3	yes	No	3.9	1.4	0.4	323	899.786	1.11429	2.78571	0.552417	Never	4440	active	No	No	2077.78	0.281266	0
96276	Male	49	Non-Hispanic Non-Hispanic White	College diploma	Living alone	1.97	medium	1	139	118.7	180	yes	No	4.2	1.9	0.5	186	411.158	1.10526	2.21053	0.659444	Never	2640	active	Yes	Yes	4981.95	0.575767	1
96279	Female	54	Non-Hispanic White	College diploma	Married/living with partner	1.06	low	2	143	108.4	156.2	yes	No	7.1	1.8	0.5	268	1057.11	1.97222	3.94444	0.693982	Current	0	inactive	No	Yes	5589.71	1.02336	1
96283	Male	46	Non-Hispanic White	College diploma	Married/living with partner	4.15	high	1	147	98.9	182.1	yes	No	2.5	2	0.7	216	270	0.875	1.25	0.543108	Former	8160	active	No	No	11528.2	2.16817	0
96287	Female	74	Other Hispanic	High school diploma	Living alone	5	high	1	136	115.1	154.6	yes	No	4.4	1.9	0.5	262	606.737	1.15789	2.31579	0.744502	Former	960	active	Yes	Yes	5509.16	0.847834	1
96291	Female	53	Non-Hispanic Non-Hispanic White	College diploma	Living alone	1.04	low	1	147	126.2	165.6	yes	No	5.5	2.1	0.8	284	743.81	2.09524	2.61905	0.762077	Never	2200	active	Yes	No	3380.98	0.238432	0
96296	Female	72	Non-Hispanic White	<High school diploma	Living alone	1.28	low	2	146	86.3	154.5	yes	No	3.6	2.2	0.5	226	369.818	0.818182	1.63636	0.558576	Current	0	inactive	No	No	10100.6	0.951539	0
96297	Female	32	Non-Hispanic White	College diploma	Married/living with partner	5	high	1	142	97.5	166.8	yes	No	3.1	2	0.5	247	382.85	0.775	1.55	0.584532	Never	12960	active	No	No	12255.9	0.509049	0
96301	Male	54	Non-Hispanic Non-Hispanic White	College diploma	Living alone	5	high	1	143	106.4	195.5	yes	No	3.6	2.3	0.7	282	441.391	1.09565	1.56522	0.544246	Never	0	inactive	Yes	Yes	5012.4	0.35376	0
96312	Female	31	Non-Hispanic White	College diploma	Married/living with partner	2.08	medium	1	142	91	154.9	yes	No	3.6	2.2	0.4	260	425.455	0.654545	1.63636	0.587476	Former	540	inactive	Yes	No	11468.4	0.577347	0
96322	Female	34	Other Race	<High school diploma	Married/living with partner	1.02	low	1	137	81	147.5	no	No	3.7	1.9	0.5	151	294.053	0.973684	1.94737	0.549153	Never	560	inactive	No	No	2790.41	0.354203	0
96325	Female	26	Other Race	College diploma	Married/living with partner	2.38	medium	2	135	94.2	148.2	yes	No	4.8	2.8	0.4	380	651.429	0.685714	1.71429	0.635628	Former	3120	active	No	No	1748.04	0.329276	0
96329	Female	42	Mexican American	<High school diploma	Married/living with partner	1.92	medium	2	136	77.2	166.1	yes	No	3.6	0.9	0.3	166	664	1.2	4	0.46478	Never	0	inactive	No	No	5057.48	0.128834	0
96332	Male	49	Non-Hispanic White	High school diploma	Married/living with partner	1.99	medium	2	135	74	179	yes	No	5.4	1.5	0.4	158	568.8	1.44	3.6	0.413408	Current	6800	active	No	No	8256.82	0.175604	0
96333	Female	60	Other Hispanic	College diploma	Married/living with partner	0.56	low	2	141	94	151.3	yes	No	4.1	2.4	0.4	270	461.25	0.683333	1.70833	0.621282	Never	5760	active	No	Yes	1487.05	0.745539	0
96335	Male	80	Non-Hispanic White	College diploma	Married/living with partner	5	high	2	146	127.7	178.9	yes	No	3.3	2.6	0.6	196	248.769	0.761538	1.26923	0.713807	Former	1440	active	Yes	Yes	3963.02	1.35466	0
96348	Male	54	Other Race	<High school diploma	Married/living with partner	1.27	low	2	139	81.2	187.7	yes	No	2.9	2.8	0.8	174	180.214	0.828571	1.03571	0.432605	Current	0	inactive	No	No	3520.58	0.214405	1
96352	Male	67	Non-Hispanic Non-Hispanic White	College diploma	Married/living with partner	2.49	medium	2	142	102.8	172.6	yes	No	2.1	1.5	0.5	191	267.4	0.7	1.4	0.595597	Never	0	inactive	Yes	Yes	1862.02	0.173684	1
96357	Male	69	Non-Hispanic Non-Hispanic White	College diploma	Married/living with partner	1.75	medium	1	144	99.1	174.6	yes	No	1.5	0.9	0.3	125	208.333	0.5	1.66667	0.567583	Former	240	inactive	Yes	No	1027.15	0.462175	0
96368	Female	31	Other Race	College diploma	Living alone	5	high	1	139	124.4	157.9	yes	No	4.5	2	0.6	267	600.75	1.35	2.25	0.78784	Current	3120	active	No	No	2601.2	1.473	0
96370	Female	77	Non-Hispanic White	College diploma	Married/living with partner	5	high	1	138	83.8	164.9	yes	No	2.6	0.9	0.3	211	609.556	0.866667	2.88889	0.508187	Never	5360	active	No	No	26966.2	0.115338	0
96377	Female	52	Other Race	High school diploma	Married/living with partner	1.52	medium	2	135	77.9	154.3	no	No	2.1	1.7	0.3	191	235.941	0.370588	1.23529	0.504861	Never	2400	active	No	No	1768.65	0.101228	0
96379	Female	21	Mexican American	College diploma	Living alone	4.31	high	1	148	86.1	175.8	yes	No	5.6	2.3	0.5	296	720.696	1.21739	2.43478	0.489761	Never	1560	active	No	No	8425.18	0.326374	0
96389	Female	77	Non-Hispanic White	College diploma	Married/living with partner	1.76	medium	1	138	94.4	152.4	no	No	4.4	1.7	0.5	303	784.235	1.29412	2.58824	0.619423	Never	800	active	Yes	No	5990.53	1.04576	1
96390	Male	46	Mexican American	College diploma	Married/living with partner	5	high	2	135	98.8	185.8	yes	No	2.2	2.1	0.4	205	214.762	0.419048	1.04762	0.531755	Never	8160	active	Yes	No	10104.3	0.553025	0
96392	Female	28	Mexican American	High school diploma	Married/living with partner	3.52	high	2	148	97.5	164.1	yes	No	8.3	2.3	0.7	288	1039.3	2.52609	3.6087	0.59415	Never	240	inactive	No	No	5554.33	0.98466	0
96396	Male	38	Mexican American	College diploma	Married/living with partner	2.63	medium	2	135	97.9	184.7	yes	No	3.3	2.1	0.4	207	325.286	0.628571	1.57143	0.530049	Never	32640	active	No	No	8561.57	0.305235	0
96403	Male	23	Mexican American	<High school diploma	Married/living with partner	2.72	medium	2	136	82.1	168.6	yes	No	5.2	1.9	0.7	241	659.579	1.91579	2.73684	0.486951	Never	12240	active	No	No	5649.21	0.235701	0
96415	Male	36	Other Hispanic	College diploma	Married/living with partner	2.39	medium	2	143	99.2	176.4	yes	No	3.4	2.7	0.7	192	241.778	0.881481	1.25926	0.562358	Former	5520	active	Yes	No	11202.4	0.323621	0
96417	Female	33	Other Race	College diploma	Married/living with partner	4.78	high	2	138	82.1	156.1	no	No	3.8	3.6	0.5	226	238.556	0.527778	1.05556	0.525945	Never	1320	active	No	No	4444.23	0.262025	0
96420	Male	60	Other Race	College diploma	Married/living with partner	5	high	2	141	90.2	178.7	yes	No	3.3	1.6	0.6	206	424.875	1.2375	2.0625	0.504757	Never	1440	active	Yes	No	1370.28	0.439905	0
96433	Female	35	Non-Hispanic White	College diploma	Married/living with partner	2.44	medium	1	145	119.3	160.7	yes	No	4.1	1.6	0.5	213	545.812	1.28125	2.5625	0.742377	Former	3360	active	No	No	19049.5	1.178	0
96452	Male	38	Mexican American	<High school diploma	Married/living with partner	0.85	low	2	140	92.8	159.5	yes	No	3.3	1.3	0.3	251	637.154	0.761538	2.53846	0.581818	Never	8320	active	No	No	3955.09	0.136797	0
96477	Male	65	Non-Hispanic Non-Hispanic White	College diploma	Living alone	1.08	low	2	145	126.4	176.6	yes	No	2	0.9	0.4	158	351.111	0.888889	2.22222	0.715742	Former	4400	active	Yes	No	1191.29	0.53343	0
96479	Female	56	Non-Hispanic White	College diploma	Married/living with partner	4.93	high	1	142	99.5	164.4	yes	No	3.1	1.7	0.5	206	375.647	0.911765	1.82353	0.605231	Never	2520	active	Yes	No	24592.9	0.101192	1
96505	Female	40	Other Race	High school diploma	Living alone	0.59	low	2	142	133.4	168	yes	No	8.2	3.8	0.5	300	647.368	1.07895	2.15789	0.794048	Current	5760	active	No	No	10625.5	0.562788	0
96508	Female	46	Mexican American	<High school diploma	Married/living with partner	1.7	medium	2	136	95.2	158.6	yes	No	3	1.7	0.5	287	506.471	0.882353	1.76471	0.600252	Never	180	inactive	No	No	3979.34	0.293106	0
96517	Female	54	Non-Hispanic White	High school diploma	Married/living with partner	0.72	low	1	139	96.6	168	yes	No	3.9	3.1	0.8	349	439.065	1.00645	1.25806	0.575	Current	8760	active	Yes	No	40625.3	0.266687	1
96519	Female	33	Non-Hispanic Non-Hispanic White	High school diploma	Living alone	1.18	low	1	144	78.2	154	no	No	4	1.6	0.5	286	715	1.25	2.5	0.507792	Never	1200	active	No	No	3623.26	0.180184	0
96523	Female	21	Other Hispanic	College diploma	Living alone	4.74	high	1	134	115.7	166.8	yes	No	3.6	2.3	0.7	249	389.739	1.09565	1.56522	0.693645	Never	1800	active	No	No	13702.9	0.451787	0
96525	Male	80	Non-Hispanic White	<High school diploma	Married/living with partner	2.15	medium	2	146	98.1	172.2	yes	No	3.9	1.6	0.5	215	524.062	1.21875	2.4375	0.569686	Former	0	inactive	Yes	No	1258.44	1.9234	1
96529	Male	66	Other Race	<High school diploma	Married/living with partner	2.98	medium	1	142	88.7	165.8	yes	No	3.6	1.9	0.5	216	409.263	0.947368	1.89474	0.534982	Never	2800	active	Yes	Yes	1192.52	0.762642	0
96540	Male	66	Other Hispanic	College diploma	Married/living with partner	1.07	low	2	148	85.7	160.8	no	No	4	1.7	0.6	203	477.647	1.41176	2.35294	0.53296	Never	4960	active	Yes	No	1343.76	1.26027	0
96552	Male	43	Non-Hispanic Non-Hispanic White	College diploma	Married/living with partner	3.03	medium	1	137	94.6	171.1	yes	No	1.5	1.9	0.5	193	152.368	0.394737	0.789474	0.552893	Never	1440	active	No	No	6565.7	0.27454	0
96560	Male	71	Non-Hispanic Non-Hispanic White	<High school diploma	Living alone	2.1	medium	2	143	73.8	173.3	yes	No	6.1	1.4	0.8	271	1180.79	3.48571	4.35714	0.425851	Current	19200	active	No	No	1903.29	0.0877583	0
96566	Male	23	Non-Hispanic White	College diploma	Living alone	0	low	1	146	96.5	183.7	yes	No	2.7	2.4	0.4	199	223.875	0.45	1.125	0.525313	Former	4920	active	No	No	14166.3	0.619316	0
96573	Female	46	Non-Hispanic White	College diploma	Married/living with partner	5	high	2	137	94.4	165.8	yes	No	3.6	1.3	0.5	288	797.538	1.38462	2.76923	0.569361	Never	6400	active	No	No	29179.8	0.136165	0
96574	Female	39	Non-Hispanic White	College diploma	Married/living with partner	3.06	medium	2	139	86	155.3	yes	No	4.8	2.3	0.4	370	772.174	0.834783	2.08696	0.553767	Never	1520	active	No	No	10003.4	0.330082	0
96587	Male	30	Non-Hispanic Non-Hispanic White	College diploma	Living alone	1.11	low	1	144	161.6	175.8	yes	No	6.6	1.6	0.5	262	1080.75	2.0625	4.125	0.919226	Current	780	active	Yes	Yes	7672.27	1.31852	0
96590	Female	27	Mexican American	<High school diploma	Married/living with partner	0.59	low	1	137	115.2	153.6	yes	No	3.4	1.9	0.5	262	468.842	0.894737	1.78947	0.75	Never	23040	active	Yes	No	6840.04	0.327823	0
96592	Male	80	Non-Hispanic White	High school diploma	Married/living with partner	2.99	medium	2	137	107.2	170.4	yes	No	6.2	2	0.8	284	880.4	2.48	3.1	0.629108	Former	3840	active	Yes	Yes	7602.48	0.780468	0
96593	Male	30	Non-Hispanic White	College diploma	Married/living with partner	5	high	2	143	94	177.4	yes	No	2.8	2.4	0.4	217	253.167	0.466667	1.16667	0.529876	Current	4320	active	Yes	No	22279.4	0.917766	0
96599	Male	72	Non-Hispanic White	College diploma	Married/living with partner	1.35	medium	1	140	114.1	167.7	yes	No	3	2.5	0.6	191	229.2	0.72	1.2	0.680382	Never	2880	active	Yes	Yes	3213.41	1.01447	0
96600	Female	25	Non-Hispanic Non-Hispanic White	College diploma	Living alone	2.73	medium	2	146	111.1	155.8	yes	No	7.1	2.6	0.7	289	789.192	1.91154	2.73077	0.713094	Current	5040	active	No	No	3732.43	0.193475	0
96602	Male	80	Non-Hispanic White	<High school diploma	Married/living with partner	5	high	2	141	106.3	168.4	yes	No	4.8	1.3	0.9	195	720	3.32308	3.69231	0.631235	Former	0	inactive	No	No	3607.83	0.185162	0
96607	Male	71	Non-Hispanic White	High school diploma	Married/living with partner	1.17	low	1	146	127	184.8	yes	No	4.6	0.7	0.5	128	841.143	3.28571	6.57143	0.687229	Former	2520	active	Yes	Yes	1623.95	0.95888	1
96622	Female	40	Non-Hispanic Non-Hispanic White	College diploma	Living alone	1.69	medium	2	142	131.1	159.6	yes	No	7.1	3.1	0.5	335	767.258	1.14516	2.29032	0.821429	Never	10800	active	No	No	5127.65	0.496738	0
96624	Male	36	Other Race	High school diploma	Married/living with partner	1.36	medium	2	148	96.7	169	yes	No	4.1	2.7	0.5	288	437.333	0.759259	1.51852	0.572189	Never	720	active	Yes	No	7378.83	1.00565	0
96628	Male	32	Non-Hispanic White	College diploma	Living alone	1.06	low	1	142	110.1	171	yes	No	3.1	1.5	0.6	170	351.333	1.24	2.06667	0.64386	Never	0	inactive	No	No	6356.73	1.03156	0
96629	Female	46	Non-Hispanic Non-Hispanic White	College diploma	Married/living with partner	3.08	medium	1	143	93.4	173.4	yes	No	2.1	2.8	0.5	222	166.5	0.375	0.75	0.538639	Never	5820	active	No	No	4638.07	0.336241	0
96630	Male	41	Other Hispanic	<High school diploma	Married/living with partner	0.51	low	2	134	119.9	175.6	yes	No	5.3	1.8	0.6	256	753.778	1.76667	2.94444	0.682802	Never	720	active	Yes	Yes	6690.76	0.75672	0
96634	Male	59	Mexican American	<High school diploma	Married/living with partner	1.32	medium	2	143	86.6	161.3	yes	No	2.8	2	0.6	168	235.2	0.84	1.4	0.536888	Former	0	inactive	Yes	Yes	4857.96	0.850543	0
96638	Male	58	Non-Hispanic White	College diploma	Married/living with partner	3.32	medium	1	145	96.5	175.3	yes	No	1.5	0.9	0.5	143	238.333	0.833333	1.66667	0.550485	Current	22800	active	No	No	7225.82	0.169233	0
96639	Male	78	Other Hispanic	<High school diploma	Married/living with partner	1.54	medium	1	140	96.7	159.9	yes	No	6.7	2.7	0.9	306	759.333	2.23333	2.48148	0.604753	Former	0	inactive	Yes	No	2062.73	0.553977	0
96641	Male	35	Other Race	College diploma	Living alone	1.06	low	2	145	89.4	190.5	yes	No	3.1	3.2	0.6	231	223.781	0.58125	0.96875	0.469291	Current	47520	active	No	No	7362.56	0.52582	0
96642	Male	67	Mexican American	<High school diploma	Married/living with partner	0.83	low	1	141	85.3	159.6	yes	No	1.9	1.9	0.3	162	162	0.3	1	0.534461	Former	7920	active	No	No	1887.88	0.686179	0
96659	Female	58	Non-Hispanic White	College diploma	Married/living with partner	5	high	1	146	86.6	174.8	yes	No	3.9	1.3	0.3	209	627	0.9	3	0.495423	Never	3600	active	Yes	No	28905.2	0.127279	0
96663	Female	20	Non-Hispanic White	High school diploma	Living alone	0.08	low	1	139	71.8	163.4	yes	No	2.4	1.8	0.5	248	330.667	0.666667	1.33333	0.439412	Never	5400	active	No	No	19134.2	0.184746	0
96667	Male	69	Mexican American	<High school diploma	Living alone	1.64	medium	2	140	126.5	165.2	yes	No	1.8	0.8	0.5	356	801	1.125	2.25	0.765738	Former	9440	active	Yes	No	1053.61	0.213005	0
96672	Male	32	Other Race	College diploma	Living alone	5	high	1	136	89.9	173	yes	No	4.7	2.6	0.5	317	573.038	0.903846	1.80769	0.519653	Former	3520	active	No	No	5300.9	1.34696	0
96681	Female	33	Other Race	High school diploma	Living alone	2.2	medium	1	137	106.2	167.7	yes	No	7.1	2.9	0.8	298	729.586	1.95862	2.44828	0.633274	Never	780	active	No	No	38597.4	0.681874	0
96700	Male	68	Non-Hispanic White	High school diploma	Married/living with partner	0.59	low	2	142	106.4	172.4	yes	No	3.7	2.1	0.7	186	327.714	1.23333	1.7619	0.617169	Former	10400	active	Yes	No	10759.9	0.711214	1
96701	Male	74	Other Hispanic	<High school diploma	Married/living with partner	0.84	low	2	134	84.9	166.4	yes	No	3.3	0.7	0.3	158	744.857	1.41429	4.71429	0.510216	Former	0	inactive	Yes	No	4847.96	0.50142	0
96704	Female	80	Non-Hispanic Non-Hispanic White	<High school diploma	Living alone	1.98	medium	2	148	95.5	160.6	yes	No	5.5	2	0.6	229	629.75	1.65	2.75	0.594645	Former	0	inactive	Yes	No	2356.28	0.318591	1
96705	Male	40	Non-Hispanic White	College diploma	Married/living with partner	5	high	2	134	91.7	166	yes	No	3.6	1.6	0.8	239	537.75	1.8	2.25	0.55241	Former	2880	active	No	No	43817.4	0.632414	0
96708	Female	52	Non-Hispanic White	College diploma	Married/living with partner	5	high	1	134	99.8	162.4	yes	No	3.4	1.4	0.5	193	468.714	1.21429	2.42857	0.614532	Never	960	active	Yes	No	6912.7	0.211526	0
96720	Male	80	Non-Hispanic White	College diploma	Married/living with partner	2.43	medium	1	142	115	167.6	yes	No	3.1	1.8	0.8	168	289.333	1.37778	1.72222	0.686158	Former	80	inactive	No	No	3757.8	0.970423	0
96721	Female	32	Mexican American	High school diploma	Married/living with partner	5	high	2	141	136.6	167	yes	No	4.8	3.3	0.4	255	370.909	0.581818	1.45455	0.817964	Former	4080	active	Yes	Yes	9525.98	2.49233	0
96743	Male	33	Non-Hispanic White	<High school diploma	Living alone	1.91	medium	2	139	135.8	185.2	yes	No	4.3	2.2	0.6	285	557.045	1.17273	1.95455	0.733261	Current	720	active	Yes	No	895.729	0.34174	0
96748	Female	37	Mexican American	<High school diploma	Married/living with partner	0.7	low	2	137	112.8	150.3	yes	No	3.6	2	0.3	234	421.2	0.54	1.8	0.750499	Never	2720	active	No	Yes	3361.98	0.335107	0
96766	Female	52	Non-Hispanic Non-Hispanic White	College diploma	Living alone	0.59	low	1	147	107.8	161.4	yes	No	5.5	2.2	0.4	339	847.5	1	2.5	0.667906	Never	0	inactive	No	No	2535.89	0.492778	0
96770	Female	78	Non-Hispanic White	High school diploma	Living alone	2.49	medium	1	142	95.4	158.3	yes	No	3	2	0.7	192	288	1.05	1.5	0.602653	Never	0	inactive	Yes	No	11385.4	1.6069	1
96774	Female	28	Other Race	College diploma	Married/living with partner	2.69	medium	1	137	84	153.9	yes	No	2.7	1.6	0.4	270	455.625	0.675	1.6875	0.545809	Never	0	inactive	No	No	2543.56	0.106028	0
96784	Male	74	Mexican American	<High school diploma	Married/living with partner	0.57	low	2	142	88.9	160.1	yes	No	3.6	1.1	0.4	183	598.909	1.30909	3.27273	0.555278	Former	560	inactive	No	Yes	1949.03	0.992903	0
96799	Male	75	Other Race	High school diploma	Married/living with partner	0.86	low	1	140	107	174.2	no	No	6	2.2	0.7	177	482.727	1.90909	2.72727	0.614237	Never	0	inactive	Yes	Yes	6847.7	0.243005	0
96800	Male	53	Non-Hispanic Non-Hispanic White	College diploma	Married/living with partner	1.58	medium	2	144	103.3	171.5	yes	No	2.9	1.7	0.4	254	433.294	0.682353	1.70588	0.602332	Never	4320	active	Yes	No	3659.93	0.342291	0
96809	Male	80	Non-Hispanic Non-Hispanic White	High school diploma	Married/living with partner	0.65	low	1	139	109	176.2	yes	No	2.6	2.7	0.4	122	117.481	0.385185	0.962963	0.618615	Never	0	inactive	Yes	No	2023.33	0.422076	0
96810	Female	39	Other Race	College diploma	Married/living with partner	2.89	medium	2	143	85.4	153.1	yes	No	2.8	2.8	0.7	291	291	0.7	1	0.557805	Former	27360	active	No	No	3121.38	0.286087	0
96826	Male	29	Other Race	High school diploma	Married/living with partner	2.43	medium	1	143	96.8	176.8	yes	No	5.6	3.2	0.8	217	379.75	1.4	1.75	0.547511	Current	240	inactive	No	No	6885.46	0.824211	0
96835	Female	68	Non-Hispanic White	College diploma	Living alone	5	high	1	134	98.1	168.1	yes	No	2.7	2	0.4	202	272.7	0.54	1.35	0.583581	Never	13440	active	No	No	23970.5	0.403401	1
96836	Female	59	Non-Hispanic Non-Hispanic White	High school diploma	Living alone	1.18	low	1	144	129	164.4	yes	No	3.6	2.9	0.5	207	256.966	0.62069	1.24138	0.784672	Former	0	inactive	Yes	Yes	3754.56	1.09854	0
96839	Female	22	Other Race	College diploma	Living alone	5	high	2	141	130.7	171.6	yes	No	7.7	2.4	0.9	319	1023.46	2.8875	3.20833	0.761655	Former	8160	active	No	No	10500.1	0.661217	0
96841	Male	74	Non-Hispanic White	High school diploma	Living alone	1.37	medium	1	139	87.1	173.3	yes	No	5	1.3	0.5	210	807.692	1.92308	3.84615	0.502597	Former	320	inactive	No	No	1838.7	0.304977	0
96842	Female	75	Non-Hispanic White	College diploma	Living alone	1.37	medium	1	139	109.6	161.1	yes	No	3.3	1.6	0.4	269	554.812	0.825	2.0625	0.680323	Never	480	inactive	Yes	No	6025.9	0.315575	1
96844	Male	55	Other Race	College diploma	Married/living with partner	2.44	medium	1	144	89.7	176.7	yes	No	3.2	2.1	0.4	173	263.619	0.609524	1.52381	0.50764	Former	6480	active	Yes	Yes	1371.02	1.74255	0
96851	Female	61	Other Hispanic	<High school diploma	Living alone	2.78	medium	1	148	100.2	151.2	no	No	4.7	2.7	0.4	252	438.667	0.696296	1.74074	0.662698	Never	0	inactive	Yes	Yes	1952.73	0.529675	0
96860	Female	22	Non-Hispanic White	College diploma	Married/living with partner	4.62	high	1	143	92.5	163.3	yes	No	3.4	1.6	0.4	212	450.5	0.85	2.125	0.566442	Never	5280	active	No	No	22401.7	0.448586	0
96865	Female	28	Non-Hispanic Non-Hispanic White	College diploma	Married/living with partner	1.13	low	2	147	78.5	172.5	yes	No	4.1	2.3	0.5	270	481.304	0.891304	1.78261	0.455072	Former	9600	active	No	No	6928.08	0.109511	0
96866	Male	80	Other Race	College diploma	Married/living with partner	5	high	2	136	94	165.7	no	No	4.8	1.2	0.5	189	756	2	4	0.56729	Never	1800	active	Yes	Yes	2264.95	0.145113	0
96876	Female	60	Non-Hispanic Non-Hispanic White	High school diploma	Married/living with partner	0.81	low	1	145	114.8	166.2	yes	No	2.8	2.6	0.6	180	193.846	0.646154	1.07692	0.690734	Never	1920	active	Yes	Yes	2093.31	0.37358	0
96877	Male	60	Non-Hispanic Non-Hispanic White	High school diploma	Living alone	2.47	medium	2	147	105.2	168.5	yes	No	3.2	3.2	0.6	251	251	0.6	1	0.624332	Never	2880	active	Yes	Yes	2524.68	0.504621	0
96885	Male	24	Mexican American	<High school diploma	Married/living with partner	0.48	low	2	136	105	168.2	yes	No	3	2.4	0.6	215	268.75	0.75	1.25	0.624257	Former	34560	active	Yes	No	5068.04	0.311644	0
96887	Female	57	Non-Hispanic White	High school diploma	Married/living with partner	1.82	medium	2	139	96	152.5	no	No	5.2	2.2	0.4	382	902.909	0.945455	2.36364	0.629508	Never	840	active	Yes	No	7668.56	0.891064	1
96890	Male	20	Non-Hispanic Non-Hispanic White	High school diploma	Living alone	0.74	low	1	146	75	175.9	yes	No	10.4	1.8	0.8	161	930.222	4.62222	5.77778	0.426379	Current	12480	active	No	No	4556.37	0.246427	0
96895	Female	60	Other Hispanic	High school diploma	Married/living with partner	5	high	2	140	89.2	159.5	yes	No	3.6	2.1	0.5	239	409.714	0.857143	1.71429	0.559248	Never	0	inactive	No	No	2399.21	0.360715	0
96898	Male	56	Other Hispanic	High school diploma	Living alone	0.87	low	2	138	101.4	169.3	yes	No	4.8	2.6	0.5	173	319.385	0.923077	1.84615	0.598937	Never	1920	active	Yes	No	10040.2	0.603253	0
96899	Male	21	Non-Hispanic Non-Hispanic White	<High school diploma	Living alone	2.79	medium	1	140	85.8	179.6	yes	No	3.4	1.8	0.5	184	347.556	0.944444	1.88889	0.477728	Never	10080	active	No	No	3848.74	0.290242	0
96901	Female	33	Mexican American	<High school diploma	Married/living with partner	0.85	low	2	140	82.7	156.5	yes	No	2.8	2.5	0.4	269	301.28	0.448	1.12	0.528435	Never	6660	active	No	No	2983.14	0.17319	0
96902	Male	75	Non-Hispanic White	College diploma	Living alone	4.56	high	1	135	90.4	169.8	yes	No	4.4	2.6	0.7	279	472.154	1.18462	1.69231	0.532391	Former	3600	active	Yes	No	1949.31	1.12961	1
96907	Female	35	Non-Hispanic White	College diploma	Married/living with partner	3.92	high	1	143	117	171.6	yes	No	5.6	2.9	0.6	327	631.448	1.15862	1.93103	0.681818	Former	4860	active	No	No	17085.8	0.420385	0
96916	Female	69	Mexican American	High school diploma	Married/living with partner	3.69	high	1	142	108.1	155.1	yes	No	2.3	2.2	0.5	215	224.773	0.522727	1.04545	0.69697	Never	1080	active	No	No	3455.59	0.361949	1
96926	Male	59	Non-Hispanic White	College diploma	Married/living with partner	5	high	1	141	84.8	185.6	yes	No	2.9	1.1	0.4	232	611.636	1.05455	2.63636	0.456897	Never	6480	active	No	No	19502.4	0.22239	0
96927	Male	70	Non-Hispanic White	College diploma	Married/living with partner	3.34	medium	2	137	116.4	176.4	yes	No	5	0.8	0.5	177	1106.25	3.125	6.25	0.659864	Former	7200	active	Yes	No	13697.6	1.18574	1
96944	Female	70	Mexican American	High school diploma	Married/living with partner	1.75	medium	1	142	94.5	160.2	yes	No	3.9	1.3	0.7	164	492	2.1	3	0.589888	Never	1440	active	No	Yes	4541.76	0.548104	1
96946	Male	77	Mexican American	<High school diploma	Living alone	2.06	medium	2	141	101.1	159.6	yes	No	3.7	2.7	0.5	158	216.519	0.685185	1.37037	0.633459	Former	0	inactive	Yes	Yes	2249.37	1.47645	0
96951	Female	36	Non-Hispanic White	College diploma	Living alone	1.48	medium	2	141	116.1	165.1	yes	No	4.7	2.2	0.6	305	651.591	1.28182	2.13636	0.70321	Never	0	inactive	Yes	No	17312.5	2.42873	0
96955	Male	64	Other Race	<High school diploma	Married/living with partner	5	high	2	135	108.1	169.7	yes	No	5.8	2.5	0.7	230	533.6	1.624	2.32	0.637006	Never	0	inactive	Yes	Yes	1893.56	0.445543	0
96962	Female	71	Other Race	College diploma	Married/living with partner	5	high	1	136	90.8	156.8	yes	No	2.2	1.8	0.4	235	287.222	0.488889	1.22222	0.579082	Never	200	inactive	Yes	No	2758.49	0.501279	0
96966	Female	25	Non-Hispanic White	College diploma	Married/living with partner	1.44	medium	1	140	88.8	160.8	yes	No	4.7	2.4	0.4	166	325.083	0.783333	1.95833	0.552239	Current	14400	active	No	No	8091.75	0.382114	0
96970	Female	49	Other Race	High school diploma	Living alone	2.04	medium	2	140	77.4	153.2	no	No	7.1	2.4	0.6	491	1452.54	1.775	2.95833	0.505222	Never	0	inactive	No	Yes	1744.2	0.349581	0
96976	Male	63	Non-Hispanic White	High school diploma	Married/living with partner	5	high	1	140	97.1	172.2	yes	No	4.1	1.3	0.7	190	599.231	2.20769	3.15385	0.563879	Never	960	active	Yes	No	14067.7	0.42109	0
96978	Male	60	Non-Hispanic Non-Hispanic White	College diploma	Married/living with partner	1.79	medium	2	140	94.7	180.5	yes	No	3.2	1.3	0.6	195	480	1.47692	2.46154	0.524654	Current	3240	active	Yes	No	1001.13	0.315363	0
96983	Male	80	Non-Hispanic White	High school diploma	Living alone	1.81	medium	2	142	110.5	166.4	yes	No	3.7	2.2	0.3	181	304.409	0.504545	1.68182	0.664062	Never	5760	active	Yes	No	4064.36	1.24107	1
96992	Male	28	Non-Hispanic Non-Hispanic White	High school diploma	Married/living with partner	2.6	medium	1	143	86	161.5	yes	No	3.4	1.5	0.4	214	485.067	0.906667	2.26667	0.532508	Never	17640	active	No	No	10499.8	0.167722	0
97011	Female	26	Non-Hispanic White	College diploma	Living alone	5	high	2	147	90.2	157.7	yes	No	4.9	2	0.3	189	463.05	0.735	2.45	0.571972	Current	1440	active	No	No	14213.4	0.308144	0
97013	Male	50	Mexican American	<High school diploma	Married/living with partner	0.1	low	1	148	106.2	162.6	yes	No	3.8	1.5	0.5	106	268.533	1.26667	2.53333	0.653137	Current	0	inactive	Yes	No	4453.23	0.600955	0
97017	Female	66	Non-Hispanic White	<High school diploma	Living alone	0.95	low	1	140	104.3	155.6	yes	No	2.8	2.4	0.5	234	273	0.583333	1.16667	0.670308	Never	0	inactive	No	No	9243.59	0.77525	0
97032	Male	50	Non-Hispanic White	High school diploma	Married/living with partner	5	high	2	135	96.4	182.3	yes	No	6.4	2.5	1	393	1006.08	2.56	2.56	0.528799	Former	3960	active	No	No	3368.15	0.968799	0
97034	Female	31	Non-Hispanic White	College diploma	Living alone	1.44	medium	2	145	80.6	162	yes	No	3.3	2.1	0.5	282	443.143	0.785714	1.57143	0.497531	Current	9120	active	No	No	17194.2	0.213904	0
97041	Female	26	Non-Hispanic Non-Hispanic White	College diploma	Living alone	5	high	1	147	93.9	160.9	yes	No	2.1	1.4	0.3	272	408	0.45	1.5	0.583592	Never	4800	active	No	No	5228.63	0.0935074	0
97042	Female	33	Non-Hispanic White	College diploma	Married/living with partner	5	high	2	141	81.8	170.2	yes	No	4.5	1.4	0.6	121	388.929	1.92857	3.21429	0.480611	Never	1800	active	No	No	15906	0.178004	0
97048	Female	34	Non-Hispanic Non-Hispanic White	College diploma	Living alone	0.62	low	1	144	96.6	159	yes	No	4.2	3.2	0.7	280	367.5	0.91875	1.3125	0.607547	Current	9600	active	No	No	3717.33	0.210472	0
97057	Female	26	Other Race	College diploma	Married/living with partner	4.78	high	2	138	80.1	160.2	yes	No	4	2.2	0.4	294	534.545	0.727273	1.81818	0.5	Never	780	active	No	No	3363.32	0.305655	0
97060	Male	20	Non-Hispanic Non-Hispanic White	College diploma	Living alone	4.9	high	1	134	88	170.2	yes	No	2.2	2	0.4	235	258.5	0.44	1.1	0.517039	Never	8480	active	No	No	9006.02	0.302907	0
97064	Male	24	Mexican American	College diploma	Married/living with partner	1.82	medium	2	136	106	165.1	yes	No	2.9	2.3	0.5	253	319	0.630435	1.26087	0.642035	Never	3720	active	No	No	10459.6	0.374348	0
97065	Male	42	Non-Hispanic Non-Hispanic White	High school diploma	Married/living with partner	1.33	medium	1	147	113.8	186.8	yes	No	4.5	1.9	0.7	223	528.158	1.65789	2.36842	0.609208	Never	1440	active	Yes	Yes	3586.36	0.460539	0
97067	Male	59	Other Race	College diploma	Married/living with partner	5	high	1	148	96.8	168.1	yes	No	4.8	3.2	0.6	246	369	0.9	1.5	0.575848	Never	600	active	Yes	No	1954.37	0.39105	0
97077	Female	52	Non-Hispanic Non-Hispanic White	College diploma	Living alone	1.66	medium	1	146	142.3	163.9	yes	No	4.7	1.4	0.4	355	1191.79	1.34286	3.35714	0.868212	Never	480	inactive	Yes	No	3454.36	0.311767	1
97093	Female	35	Non-Hispanic Non-Hispanic White	College diploma	Married/living with partner	3.03	medium	1	147	106.8	174.8	yes	No	3.3	2.1	0.5	395	620.714	0.785714	1.57143	0.610984	Never	5080	active	No	No	3706.8	0.224152	0
97095	Female	44	Other Race	College diploma	Living alone	3.49	medium	2	143	101.8	161.3	yes	No	7.2	3.4	0.6	320	677.647	1.27059	2.11765	0.631122	Current	1080	active	Yes	No	18130.1	0.752902	0
97099	Female	77	Non-Hispanic White	College diploma	Married/living with partner	5	high	2	146	96.2	155.1	yes	No	2.8	1.5	0.6	326	608.533	1.12	1.86667	0.620245	Never	720	active	Yes	Yes	12055.5	0.324695	1
97108	Male	51	Other Race	College diploma	Married/living with partner	5	high	1	143	102.7	164.9	yes	No	3.2	2.9	0.4	197	217.379	0.441379	1.10345	0.622802	Former	4560	active	Yes	No	1407.2	0.797605	0
97131	Female	53	Non-Hispanic Non-Hispanic White	College diploma	Living alone	5	high	1	137	99.5	167	no	No	2.3	2.1	0.4	236	258.476	0.438095	1.09524	0.595808	Never	240	inactive	No	No	6997.43	0.320968	0
97138	Female	47	Non-Hispanic White	High school diploma	Living alone	0.96	low	2	140	81	172.5	yes	No	2.4	1.8	0.5	217	289.333	0.666667	1.33333	0.469565	Never	4560	active	No	No	5126.55	0.23141	0
97143	Male	61	Mexican American	<High school diploma	Married/living with partner	5	high	1	140	109.2	166.3	yes	No	4.4	1.6	0.6	195	536.25	1.65	2.75	0.656645	Never	1440	active	No	Yes	1154.03	0.527165	0
97153	Male	30	Non-Hispanic White	College diploma	Living alone	1.52	medium	2	143	105.9	171.9	yes	No	4.1	2.5	0.7	261	428.04	1.148	1.64	0.616056	Never	3000	active	No	No	8617.59	2.29056	0
97166	Female	40	Mexican American	<High school diploma	Married/living with partner	1.09	low	1	148	92	156.6	yes	No	6.6	1.9	0.5	261	906.632	1.73684	3.47368	0.587484	Former	1200	active	No	No	9029.63	0.686343	0
97174	Female	26	Other Race	College diploma	Married/living with partner	5	high	2	138	77.7	150.7	yes	No	1.8	1.4	0.5	192	246.857	0.642857	1.28571	0.515594	Never	480	inactive	No	No	6410.78	0.87036	0
97181	Male	65	Other Hispanic	<High school diploma	Married/living with partner	1.87	medium	1	137	104.4	159.1	yes	No	3.3	1	0.4	189	623.7	1.32	3.3	0.656191	Never	18240	active	No	Yes	1252.37	0.937416	0
97201	Male	60	Non-Hispanic Non-Hispanic White	High school diploma	Living alone	0.16	low	2	144	76.4	175	yes	No	1.9	1.6	0.6	185	219.688	0.7125	1.1875	0.436571	Current	7440	active	No	No	2812.23	0.130971	0
97204	Female	80	Non-Hispanic White	College diploma	Living alone	3.33	medium	1	135	107.2	155.7	yes	No	3.1	1.2	0.6	200	516.667	1.55	2.58333	0.688504	Former	0	inactive	Yes	No	5485.13	0.610637	0
97206	Male	69	Non-Hispanic White	College diploma	Married/living with partner	5	high	1	145	97.8	183.4	yes	No	3.8	1.5	0.4	182	461.067	1.01333	2.53333	0.533261	Former	25440	active	No	No	20424.9	0.135895	1
97223	Male	26	Non-Hispanic Non-Hispanic White	High school diploma	Living alone	4.16	high	1	141	80.8	181.7	yes	No	3.4	1.3	0.6	187	489.077	1.56923	2.61538	0.444689	Never	5760	active	No	No	7575.68	0.132041	0
97231	Female	27	Other Race	College diploma	Living alone	2.94	medium	1	136	98	155.5	yes	No	4.9	2.8	0.6	273	477.75	1.05	1.75	0.630225	Current	1440	active	No	No	3770.15	1.3563	0
97233	Male	69	Other Race	College diploma	Married/living with partner	1.54	medium	1	136	90	157.5	yes	No	2.8	2	0.5	259	362.6	0.7	1.4	0.571429	Former	0	inactive	Yes	Yes	1479.68	0.384962	0
97234	Female	32	Other Race	College diploma	Living alone	0.28	low	1	139	110.9	161.1	yes	No	3.1	2	0.8	260	403	1.24	1.55	0.688392	Never	15840	active	Yes	No	7311.33	1.52927	0
97236	Male	45	Other Race	College diploma	Married/living with partner	4.17	high	1	139	82.2	171.2	no	No	2.8	1.9	0.4	164	241.684	0.589474	1.47368	0.48014	Never	3040	active	Yes	No	4303.42	0.140123	0
97242	Male	75	Non-Hispanic White	High school diploma	Married/living with partner	1.52	medium	2	139	109.7	173.9	yes	No	4.7	2.7	0.9	206	358.593	1.56667	1.74074	0.630822	Never	1920	active	Yes	No	1760.65	0.26649	1
97247	Male	45	Mexican American	High school diploma	Married/living with partner	3.38	medium	1	146	103.5	179.1	yes	No	2.5	1.3	0.4	184	353.846	0.769231	1.92308	0.577889	Former	2440	active	No	No	6206.16	0.311229	0
97248	Female	68	Other Hispanic	<High school diploma	Living alone	1.1	low	2	141	87.5	148.7	yes	No	2.1	3.5	1.1	203	121.8	0.66	0.6	0.588433	Never	0	inactive	No	No	881.328	2.26255	0
97249	Female	20	Non-Hispanic Non-Hispanic White	College diploma	Living alone	1.14	low	1	139	102.4	162.4	yes	No	3.8	2.9	0.5	347	454.69	0.655172	1.31034	0.630542	Never	15600	active	No	No	6945.9	0.389627	0
97255	Male	29	Non-Hispanic Non-Hispanic White	College diploma	Married/living with partner	1.58	medium	2	147	93.4	170.9	yes	No	3.5	2.3	0.5	288	438.261	0.76087	1.52174	0.546518	Never	0	inactive	No	No	3438.99	0.771388	0
97264	Female	67	Mexican American	College diploma	Living alone	3.88	high	1	135	125.1	153.5	no	No	3.6	2.1	0.6	113	193.714	1.02857	1.71429	0.814984	Never	360	inactive	No	Yes	2220.55	0.822393	1
97266	Male	43	Other Race	College diploma	Married/living with partner	0.59	low	2	140	88.8	180.2	yes	No	1.6	1.6	0.4	133	133	0.4	1	0.492786	Never	27480	active	No	No	7022.29	0.310103	0
97270	Female	36	Non-Hispanic Non-Hispanic White	<High school diploma	Married/living with partner	0.28	low	2	143	96.6	156.3	yes	No	2.4	1.5	0.4	262	419.2	0.64	1.6	0.618042	Former	3840	active	No	No	5516.11	0.618745	0
97275	Female	39	Non-Hispanic Non-Hispanic White	High school diploma	Married/living with partner	1.07	low	2	143	78.8	172.6	yes	No	1.2	1.2	0.3	235	235	0.3	1	0.456547	Current	0	inactive	No	No	8897.66	0.0359283	0
97277	Male	47	Mexican American	<High school diploma	Living alone	0.04	low	2	137	113.4	166	yes	No	3.9	4	0.8	141	137.475	0.78	0.975	0.683133	Never	14760	active	No	No	3374.82	1.83451	0
97280	Male	48	Mexican American	<High school diploma	Living alone	1.89	medium	2	148	103.5	167.9	yes	No	4.6	2.4	0.6	208	398.667	1.15	1.91667	0.616438	Former	6240	active	No	Yes	2726.42	1.80925	0
97284	Female	52	Non-Hispanic White	College diploma	Living alone	0.75	low	1	135	92.8	166.7	yes	No	4.6	2	0.6	328	754.4	1.38	2.3	0.556689	Current	480	inactive	Yes	No	32829.8	0.392708	1
97293	Female	27	Mexican American	College diploma	Married/living with partner	1.2	low	2	147	91.7	153	yes	No	3.7	3.2	0.4	389	449.781	0.4625	1.15625	0.599346	Former	0	inactive	No	No	8313.83	0.535103	0
97299	Male	59	Non-Hispanic White	College diploma	Living alone	2.47	medium	2	140	110.1	183.1	yes	No	3.2	2.5	0.6	220	281.6	0.768	1.28	0.601311	Current	9000	active	No	No	34064.4	1.30839	0
97304	Female	26	Mexican American	High school diploma	Married/living with partner	0.59	low	2	143	114.7	161.1	yes	No	5.6	2.2	0.6	306	778.909	1.52727	2.54545	0.71198	Former	11760	active	No	No	10799.3	1.70484	0
97305	Male	64	Non-Hispanic White	High school diploma	Living alone	5	high	1	135	102	176.1	yes	No	2.5	1.8	0.6	134	186.111	0.833333	1.38889	0.579216	Former	3600	active	No	No	18632.6	0.342216	0
97320	Male	65	Non-Hispanic Non-Hispanic White	College diploma	Married/living with partner	2.16	medium	1	139	80.4	178.1	yes	No	3	2.8	0.6	294	315	0.642857	1.07143	0.451432	Current	0	inactive	Yes	No	1805.85	0.243407	0
97326	Male	64	Other Race	College diploma	Married/living with partner	1.79	medium	2	135	99.7	177.2	yes	No	4.7	1.7	0.6	317	876.412	1.65882	2.76471	0.562641	Current	0	inactive	No	No	864.906	0.592139	0
97338	Female	37	Other Race	High school diploma	Living alone	0.59	low	2	140	115.2	170.7	yes	No	4.7	2.2	0.5	274	585.364	1.06818	2.13636	0.674868	Current	3280	active	No	No	9456	0.574822	0
97349	Female	31	Other Race	College diploma	Married/living with partner	2.79	medium	2	144	96	155.7	no	No	5.3	2.1	0.6	342	863.143	1.51429	2.52381	0.61657	Never	0	inactive	No	No	2527.63	0.794561	0
97352	Male	45	Non-Hispanic White	High school diploma	Married/living with partner	2.21	medium	2	142	79.2	164.6	yes	No	3.3	1.2	0.3	178	489.5	0.825	2.75	0.481166	Never	13520	active	No	No	13991.3	0.184651	0
97353	Male	80	Non-Hispanic White	College diploma	Living alone	1.66	medium	1	143	85.4	170.7	yes	No	4.5	1.6	0.6	186	523.125	1.6875	2.8125	0.500293	Former	720	active	Yes	No	3368.51	0.130453	0
97361	Male	54	Other Race	College diploma	Married/living with partner	5	high	2	135	106.3	187.9	yes	No	3.2	2	0.4	181	289.6	0.64	1.6	0.565726	Never	1200	active	No	No	2328.63	1.38025	0
97362	Male	22	Non-Hispanic White	College diploma	Living alone	1.69	medium	2	141	81	183.9	yes	No	2.8	1.1	0.4	193	491.273	1.01818	2.54545	0.440457	Never	35520	active	No	No	12378.9	0.0880914	0
97367	Female	61	Non-Hispanic White	High school diploma	Married/living with partner	3.04	medium	2	139	108.4	168.4	yes	No	3.1	2	0.7	224	347.2	1.085	1.55	0.643705	Current	0	inactive	Yes	No	16452.5	0.314324	0
97375	Male	71	Other Race	High school diploma	Living alone	1.4	medium	2	145	130.1	177.4	yes	No	5.7	1.7	0.6	184	616.941	2.01176	3.35294	0.733371	Former	0	inactive	No	Yes	3566.97	1.35274	1
97379	Male	38	Other Hispanic	High school diploma	Married/living with partner	2.67	medium	2	136	89.6	166.9	yes	No	3.6	2	0.8	180	324	1.44	1.8	0.536848	Never	3200	active	No	No	8315.16	0.58018	0
97390	Male	76	Non-Hispanic White	College diploma	Married/living with partner	5	high	2	147	113.1	172.5	yes	No	6.8	1.6	0.9	300	1275	3.825	4.25	0.655652	Never	1080	active	Yes	No	24317.6	0.364824	0
97415	Male	54	Other Race	College diploma	Married/living with partner	5	high	2	138	89.9	162.6	yes	No	2.9	2.4	0.4	186	224.75	0.483333	1.20833	0.552891	Never	7920	active	No	Yes	2788.91	0.215437	0
97419	Female	55	Other Race	College diploma	Living alone	5	high	1	148	82.8	155.3	yes	No	2.6	2.3	0.4	221	249.826	0.452174	1.13043	0.533162	Never	0	inactive	No	No	2304.8	0.146922	0
97422	Male	80	Non-Hispanic White	<High school diploma	Living alone	2.19	medium	2	146	83.7	160.3	yes	No	1.8	1.7	0.6	148	156.706	0.635294	1.05882	0.522146	Former	2080	active	Yes	No	11405.3	0.18349	0
97428	Male	77	Non-Hispanic White	College diploma	Living alone	1.42	medium	2	139	114.3	166.2	yes	No	5.4	1.3	0.6	146	606.462	2.49231	4.15385	0.687726	Former	0	inactive	Yes	Yes	1723.17	1.03101	0
97436	Male	45	Other Race	College diploma	Married/living with partner	0.32	low	2	146	94.2	173.6	no	No	3.5	1.3	0.5	327	880.385	1.34615	2.69231	0.542627	Never	7920	active	No	No	1684.5	0.699031	0
97443	Female	56	Non-Hispanic White	College diploma	Living alone	0.16	low	2	137	97.8	166.8	yes	No	2.6	1.7	0.4	278	425.176	0.611765	1.52941	0.586331	Former	480	inactive	No	No	7522.51	0.164827	0
97446	Male	52	Mexican American	<High school diploma	Living alone	2.02	medium	2	148	97.2	164.3	no	No	2.8	2.1	0.4	195	260	0.533333	1.33333	0.591601	Never	18000	active	Yes	No	1839.53	0.477258	0
97456	Female	38	Non-Hispanic Non-Hispanic White	College diploma	Living alone	0.62	low	1	147	82.7	169.7	yes	No	2.7	1.7	0.5	220	349.412	0.794118	1.58824	0.487331	Never	3600	active	No	No	4776.38	0.0272616	0
97465	Male	38	Mexican American	<High school diploma	Married/living with partner	0.12	low	2	144	102.7	183.2	yes	No	3.7	1.6	0.5	232	536.5	1.15625	2.3125	0.56059	Never	360	inactive	No	No	5633.37	0.834602	0
97468	Male	46	Non-Hispanic White	College diploma	Married/living with partner	2.41	medium	2	146	86.8	175	yes	Yes	6.7	2.4	0.8	228	636.5	2.23333	2.79167	0.496	Current	4800	active	No	No	19152.6	0.280196	0
97478	Female	47	Mexican American	<High school diploma	Married/living with partner	2	medium	2	148	96.4	159.6	yes	No	3.9	2.1	0.3	265	492.143	0.557143	1.85714	0.60401	Never	400	inactive	No	Yes	5372.29	0.351103	0
97482	Female	70	Non-Hispanic White	<High school diploma	Living alone	1.24	low	1	140	134.3	160.7	yes	No	3.1	1.4	0.5	171	378.643	1.10714	2.21429	0.835719	Former	3120	active	Yes	Yes	4093.7	0.858374	1
97485	Female	33	Non-Hispanic White	College diploma	Married/living with partner	5	high	1	144	86.6	168.2	yes	No	2.9	1.9	0.5	155	236.579	0.763158	1.52632	0.514863	Former	0	inactive	No	No	25298.1	0.144503	0
97487	Female	53	Other Race	High school diploma	Married/living with partner	5	high	1	136	85.5	145.3	no	No	2.7	1.7	0.4	236	374.824	0.635294	1.58824	0.588438	Never	1440	active	No	No	3448.98	0.315148	0
97492	Male	45	Non-Hispanic White	<High school diploma	Married/living with partner	1.11	low	1	141	83.8	179.3	yes	No	3.3	1.3	0.4	178	451.846	1.01538	2.53846	0.467373	Current	29120	active	No	Yes	4309.36	0.144735	0
97497	Male	24	Non-Hispanic Non-Hispanic White	College diploma	Living alone	1.44	medium	2	140	81.9	178.2	no	No	2.6	2	0.6	283	367.9	0.78	1.3	0.459596	Never	35760	active	No	No	5720.45	0.354407	0
97501	Female	54	Other Hispanic	College diploma	Married/living with partner	1.72	medium	2	134	112.1	163.8	yes	No	3.2	2	0.5	286	457.6	0.8	1.6	0.684371	Never	840	active	No	No	7440.81	1.23932	0
97506	Male	69	Other Race	College diploma	Married/living with partner	4.07	high	1	139	106.7	170.9	yes	No	4.9	1.9	0.7	274	706.632	1.80526	2.57895	0.624342	Current	1440	active	Yes	Yes	2022.06	0.27226	1
97510	Female	61	Non-Hispanic Non-Hispanic White	College diploma	Married/living with partner	1.57	medium	1	147	108.7	166.1	yes	No	6	2	0.6	243	729	1.8	3	0.654425	Former	3000	active	Yes	No	1449.23	0.453541	0
97533	Male	30	Other Race	College diploma	Married/living with partner	5	high	2	134	84	176.8	yes	No	2.5	1.8	0.4	150	208.333	0.555556	1.38889	0.475113	Never	2880	active	No	No	2908.56	0.449825	0
97550	Female	47	Non-Hispanic White	College diploma	Married/living with partner	4.17	high	1	138	80.2	163.5	yes	No	1.2	0.9	0.2	151	201.333	0.266667	1.33333	0.49052	Never	3360	active	No	No	52105.7	0.134893	0
97555	Female	48	Mexican American	High school diploma	Married/living with partner	1.99	medium	2	135	99.6	160.3	yes	No	4.3	1.1	0.6	359	1403.36	2.34545	3.90909	0.621335	Never	0	inactive	No	No	10772.4	0.21864	0
97560	Male	55	Mexican American	College diploma	Married/living with partner	3.31	medium	2	135	93.5	173	yes	No	4.3	1.5	0.7	211	604.867	2.00667	2.86667	0.540462	Never	5880	active	No	No	9059.81	1.28607	0
97572	Male	50	Non-Hispanic White	High school diploma	Married/living with partner	1.95	medium	1	135	108.2	180.6	yes	No	2.8	1.5	0.5	231	431.2	0.933333	1.86667	0.599114	Never	5680	active	No	No	14994.4	0.158362	0
97573	Female	62	Other Race	<High school diploma	Married/living with partner	2.98	medium	1	142	85.4	158.8	yes	No	1.8	2	0.3	255	229.5	0.27	0.9	0.537783	Never	240	inactive	No	No	1399.89	2.12519	0
97577	Female	56	Non-Hispanic White	College diploma	Living alone	0	low	1	142	103.2	147.3	yes	No	3.5	0.6	0.5	189	1102.5	2.91667	5.83333	0.700611	Never	320	inactive	No	No	4382.4	1.22209	1
97578	Male	41	Mexican American	<High school diploma	Married/living with partner	1.14	low	1	148	84.7	157.8	yes	No	2.1	1.8	0.4	256	298.667	0.466667	1.16667	0.536755	Former	1680	active	No	No	5155.76	0.393748	0
97580	Male	26	Mexican American	College diploma	Living alone	2.99	medium	1	144	89.1	167.1	yes	No	3.2	2.8	0.5	272	310.857	0.571429	1.14286	0.533214	Former	6720	active	No	No	7023.65	0.268614	0
97585	Male	21	Non-Hispanic White	College diploma	Living alone	5	high	2	134	94	168.4	yes	No	3.6	2.1	0.5	217	372	0.857143	1.71429	0.558195	Former	6720	active	No	No	51121.6	0.148006	0
97592	Male	63	Other Race	<High school diploma	Married/living with partner	2.38	medium	2	135	95	175.4	yes	No	4	2.2	0.5	238	432.727	0.909091	1.81818	0.541619	Never	2280	active	No	Yes	1547.5	0.946301	0
97595	Male	36	Other Race	College diploma	Married/living with partner	5	high	1	139	76	179.1	yes	No	3.3	4	0.8	208	171.6	0.66	0.825	0.424344	Current	4800	active	No	No	4282.22	0.96196	0
97597	Female	77	Non-Hispanic Non-Hispanic White	College diploma	Married/living with partner	1.52	medium	1	147	94.2	163.4	yes	No	2.8	1.9	0.5	206	303.579	0.736842	1.47368	0.576499	Never	0	inactive	Yes	No	1672.85	0.43407	0
97602	Female	40	Non-Hispanic Non-Hispanic White	College diploma	Married/living with partner	1.14	low	1	147	101.8	173.8	yes	No	1.4	1.2	0.4	251	292.833	0.466667	1.16667	0.585731	Never	0	inactive	No	No	3138.51	0.551877	0
97605	Female	67	Non-Hispanic White	College diploma	Living alone	2.49	medium	1	146	92.6	162.8	yes	No	3.6	4	0.6	218	196.2	0.54	0.9	0.568796	Current	0	inactive	No	No	4011.67	1.58987	0
97609	Male	66	Other Race	College diploma	Living alone	0.75	low	1	137	94.4	166.9	yes	No	2.4	4.1	0.6	221	129.366	0.35122	0.585366	0.565608	Current	6720	active	Yes	Yes	1729.81	1.24112	0
97620	Female	41	Other Race	College diploma	Married/living with partner	3.4	medium	2	137	127.3	158.6	yes	No	4.4	2.1	0.4	309	647.429	0.838095	2.09524	0.802648	Never	240	inactive	Yes	Yes	4269.18	1.13288	0
97623	Female	71	Other Race	College diploma	Married/living with partner	1.82	medium	2	148	102.2	157.9	yes	No	4	2.5	0.5	242	387.2	0.8	1.6	0.647245	Never	1200	active	Yes	Yes	1893.47	0.546783	0
97624	Female	32	Other Race	College diploma	Married/living with partner	5	high	1	136	68.4	146.8	yes	No	4.5	3.9	0.8	230	265.385	0.923077	1.15385	0.46594	Never	640	active	No	No	4752.73	0.175477	0
97630	Female	78	Non-Hispanic White	College diploma	Married/living with partner	2.43	medium	2	139	115.3	166.6	yes	No	3.5	1.9	0.7	152	280	1.28947	1.84211	0.692077	Never	5040	active	Yes	Yes	7038.75	0.442071	1
97635	Female	56	Other Hispanic	College diploma	Living alone	4.08	high	2	134	84.6	151.6	yes	No	3.4	1.7	0.3	254	508	0.6	2	0.558047	Never	0	inactive	No	No	9566.9	0.377272	0
97638	Male	51	Non-Hispanic Non-Hispanic White	High school diploma	Living alone	0.82	low	2	144	93.3	176.5	yes	No	2.1	2.4	0.4	170	148.75	0.35	0.875	0.528612	Former	480	inactive	No	No	7207.56	0.678185	0
97640	Male	41	Mexican American	High school diploma	Married/living with partner	2.2	medium	1	146	116.5	168.4	yes	No	4.2	1.9	0.3	274	605.684	0.663158	2.21053	0.691805	Never	15120	active	No	No	10352.5	1.12437	0
97648	Female	32	Non-Hispanic White	College diploma	Living alone	3.43	medium	1	141	136.6	164.8	yes	No	6.6	3.3	1.1	237	474	2.2	2	0.828883	Never	8640	active	No	No	23876.8	0.543453	0
97657	Female	60	Non-Hispanic White	College diploma	Married/living with partner	1.68	medium	2	136	73.8	162.1	yes	No	3.5	1.2	0.5	274	799.167	1.45833	2.91667	0.455275	Never	1320	active	No	No	5500.36	0.170521	0
97659	Male	46	Other Hispanic	High school diploma	Married/living with partner	0.1	low	2	145	94.8	161.1	yes	No	9.3	1.2	0.7	204	1581	5.425	7.75	0.588454	Current	0	inactive	Yes	No	12729	0.529008	0
97675	Female	41	Non-Hispanic Non-Hispanic White	High school diploma	Living alone	0.55	low	1	143	86.3	164.9	yes	No	3.4	1.9	0.5	297	531.474	0.894737	1.78947	0.523347	Never	960	active	Yes	No	8232.65	0.152188	0
97676	Male	63	Other Race	College diploma	Married/living with partner	5	high	1	138	91.5	160.8	yes	No	2.3	2.6	0.6	71	62.8077	0.530769	0.884615	0.56903	Current	840	active	Yes	Yes	2045.23	0.379125	0
97685	Male	23	Other Hispanic	College diploma	Married/living with partner	2.55	medium	2	145	118.1	167.9	yes	No	6.7	2.3	0.9	219	637.957	2.62174	2.91304	0.703395	Never	9360	active	No	No	9515.59	1.74198	0
97691	Female	29	Non-Hispanic Non-Hispanic White	College diploma	Living alone	0.17	low	1	145	102	163	yes	No	2.3	2.1	0.5	205	224.524	0.547619	1.09524	0.625767	Never	120	inactive	No	No	4204.24	0.503691	0
97695	Female	52	Other Race	College diploma	Living alone	1.97	medium	1	136	88.3	155	yes	No	3.4	2.1	0.5	362	586.095	0.809524	1.61905	0.569677	Former	80	inactive	Yes	Yes	2659.4	0.726339	0
97699	Female	55	Mexican American	High school diploma	Married/living with partner	3.31	medium	2	135	92	156.9	yes	No	2.7	1.5	0.3	230	414	0.54	1.8	0.586361	Never	0	inactive	Yes	No	7364.73	0.48478	1
97703	Male	35	Other Hispanic	<High school diploma	Married/living with partner	1.82	medium	1	134	98.3	159.1	yes	No	2.8	1.9	0.5	268	394.947	0.736842	1.47368	0.61785	Former	18480	active	No	No	8930.89	0.404486	0
97706	Male	50	Mexican American	College diploma	Married/living with partner	2.72	medium	2	138	105.3	171.6	yes	No	5.7	2.1	0.5	212	575.429	1.35714	2.71429	0.613636	Current	960	active	No	Yes	6045.07	1.67997	0
97708	Male	76	Non-Hispanic Non-Hispanic White	College diploma	Living alone	3.29	medium	2	135	103.6	168.9	yes	No	5.5	1.7	0.6	216	698.824	1.94118	3.23529	0.613381	Former	0	inactive	No	No	1540.7	0.133859	0
97709	Female	22	Non-Hispanic White	High school diploma	Married/living with partner	2.01	medium	2	142	110.4	160.3	yes	No	3.8	1.3	0.6	283	827.231	1.75385	2.92308	0.688709	Current	3600	active	No	No	27601.2	0.218091	0
97711	Female	80	Non-Hispanic White	High school diploma	Married/living with partner	4.27	high	1	139	91	146.9	yes	No	4.3	1.2	0.7	177	634.25	2.50833	3.58333	0.619469	Never	0	inactive	Yes	No	9126.22	0.227031	1
97735	Male	30	Mexican American	High school diploma	Living alone	1.98	medium	2	143	111.3	176.4	yes	No	4.7	3.8	0.8	224	277.053	0.989474	1.23684	0.630952	Current	1440	active	No	No	11233.1	0.91517	0
97737	Male	57	Non-Hispanic White	College diploma	Married/living with partner	5	high	2	140	88.8	177.1	yes	No	3.4	1.5	0.6	213	482.8	1.36	2.26667	0.501412	Former	2880	active	No	No	23551.4	0.224707	0
97741	Female	36	Non-Hispanic White	College diploma	Living alone	1.91	medium	1	143	78.7	160.1	yes	No	4.2	1.2	0.5	221	773.5	1.75	3.5	0.491568	Current	0	inactive	No	No	11250	0.0952978	1
97747	Male	47	Non-Hispanic Non-Hispanic White	College diploma	Married/living with partner	3.47	medium	1	141	90.5	166.6	no	No	2	1.6	0.4	193	241.25	0.5	1.25	0.543217	Never	2400	active	No	No	2932.51	0.12014	0
97752	Male	77	Non-Hispanic White	College diploma	Married/living with partner	5	high	1	146	130.5	173.2	yes	No	5.2	1.5	0.8	192	665.6	2.77333	3.46667	0.753464	Former	0	inactive	Yes	Yes	20335.7	0.71522	1
97758	Female	54	Non-Hispanic Non-Hispanic White	College diploma	Living alone	0.28	low	1	139	118.6	153.9	yes	No	3.3	2	0.4	260	429	0.66	1.65	0.77063	Never	720	active	Yes	No	3221.88	0.680461	0
97768	Female	56	Other Race	College diploma	Living alone	1.18	low	2	144	96.8	161.7	yes	No	3.5	2.1	0.5	231	385	0.833333	1.66667	0.598639	Former	160	inactive	No	No	5818.11	0.414919	0
97783	Female	46	Non-Hispanic Non-Hispanic White	College diploma	Living alone	2.73	medium	2	146	127.6	163.8	yes	No	4.6	3	0.8	319	489.133	1.22667	1.53333	0.778999	Never	0	inactive	Yes	No	2569.01	0.194535	1
97787	Male	52	Other Race	College diploma	Living alone	1.99	medium	1	145	89.2	176.6	yes	No	6.1	1.5	0.7	279	1134.6	2.84667	4.06667	0.505096	Former	6000	active	No	No	3427.05	0.281639	0
97794	Female	45	Other Race	College diploma	Living alone	3.15	medium	1	144	81.5	166.6	no	No	2.5	1.3	0.3	175	336.538	0.576923	1.92308	0.489196	Never	10080	active	No	No	1025.11	0.227782	0
97802	Male	71	Non-Hispanic White	High school diploma	Married/living with partner	5	high	2	139	120.9	170.1	yes	No	3.4	1.3	1.1	209	546.615	2.87692	2.61538	0.710758	Never	0	inactive	Yes	Yes	6896.28	2.02405	1
97813	Female	60	Non-Hispanic White	College diploma	Living alone	1.79	medium	2	141	114	165	yes	No	5.2	2.4	0.5	279	604.5	1.08333	2.16667	0.690909	Former	2160	active	No	No	7391.38	0.968627	0
97827	Male	50	Other Race	College diploma	Married/living with partner	5	high	2	138	101.4	171.1	yes	No	2.1	1.6	0.3	207	271.688	0.39375	1.3125	0.592636	Former	4800	active	No	No	2992.62	1.96503	0
97830	Male	60	Non-Hispanic White	College diploma	Living alone	2.47	medium	2	142	124.2	174.3	yes	No	5.1	2.6	0.7	165	323.654	1.37308	1.96154	0.712565	Former	0	inactive	Yes	Yes	25163.2	1.32988	0
97847	Female	65	Non-Hispanic White	College diploma	Married/living with partner	4.62	high	1	141	80.4	158.8	yes	No	3	1.9	0.5	289	456.316	0.789474	1.57895	0.506297	Former	480	inactive	No	No	26868.9	0.303778	0
97878	Female	49	Non-Hispanic Non-Hispanic White	College diploma	Living alone	4.07	high	2	148	107.9	163.2	yes	No	4.2	3	0.9	332	464.8	1.26	1.4	0.661152	Never	11760	active	Yes	Yes	1490.09	0.274301	0
97896	Female	57	Other Race	<High school diploma	Married/living with partner	2.03	medium	1	145	83.7	157.2	yes	No	5.1	3	0.7	284	482.8	1.19	1.7	0.532443	Current	11520	active	No	No	15535.6	1.34105	0
97901	Male	45	Non-Hispanic White	College diploma	Married/living with partner	1.77	medium	2	144	91.6	181	yes	No	3.3	2.1	0.5	192	301.714	0.785714	1.57143	0.506077	Never	920	active	No	No	3514.74	1.10221	0
97902	Male	62	Other Hispanic	<High school diploma	Married/living with partner	0.56	low	2	141	105	173.8	yes	No	4.2	3.1	0.7	202	273.677	0.948387	1.35484	0.604143	Former	3600	active	Yes	Yes	999.163	1.46549	0
97908	Male	62	Non-Hispanic White	College diploma	Married/living with partner	1.68	medium	2	136	104.4	167	yes	No	3	1.1	0.5	163	444.545	1.36364	2.72727	0.62515	Former	360	inactive	No	No	4290.03	0.377566	0
97926	Male	80	Non-Hispanic White	College diploma	Married/living with partner	2.92	medium	1	142	99.9	169.1	no	No	3.7	1.5	0.5	180	444	1.23333	2.46667	0.590775	Never	0	inactive	No	No	1420.82	0.696492	0
97928	Male	56	Mexican American	College diploma	Married/living with partner	5	high	1	148	91.7	183.5	yes	No	3.8	2.1	0.4	154	278.667	0.72381	1.80952	0.499728	Never	2160	active	No	No	7450.44	0.644052	0
97934	Male	25	Non-Hispanic White	High school diploma	Living alone	5	high	2	134	85.6	171.7	yes	No	2.5	2.9	0.8	245	211.207	0.689655	0.862069	0.498544	Former	16000	active	No	No	47334.7	0.247085	0
97937	Female	61	Other Race	College diploma	Married/living with partner	4.25	high	2	134	67.9	158.6	no	No	3.3	1.1	0.3	236	708	0.9	3	0.428121	Never	5360	active	No	No	2689.1	0.163653	0
97940	Male	29	Other Race	College diploma	Married/living with partner	5	high	2	146	89.7	177.9	yes	No	2.8	1.7	0.4	225	370.588	0.658824	1.64706	0.504216	Former	7560	active	No	No	6610.66	0.678922	0
97944	Female	63	Non-Hispanic White	High school diploma	Married/living with partner	3.69	high	1	134	95.2	153.9	yes	No	4.9	2.2	0.7	282	628.091	1.55909	2.22727	0.618583	Current	0	inactive	No	No	27486.9	0.384577	1
97945	Female	28	Mexican American	College diploma	Married/living with partner	2.19	medium	2	135	91.4	146.2	yes	No	4.1	1.8	0.4	215	489.722	0.911111	2.27778	0.625171	Never	480	inactive	No	No	1269.67	0.568724	0
97950	Female	69	Non-Hispanic Non-Hispanic White	College diploma	Living alone	2.22	medium	2	146	99.7	159.6	yes	No	3.4	2.7	0.4	231	290.889	0.503704	1.25926	0.624687	Current	1920	active	Yes	No	2261.85	0.314167	0
97951	Female	24	Other Race	College diploma	Living alone	5	high	2	138	69.5	153	yes	No	1.6	1.8	0.3	183	162.667	0.266667	0.888889	0.454248	Never	840	active	No	No	4126.4	0.141123	0
97952	Male	57	Other Race	College diploma	Married/living with partner	5	high	1	141	98.7	166.5	yes	No	2.7	1.8	0.4	199	298.5	0.6	1.5	0.592793	Never	360	inactive	No	Yes	1582.37	0.729509	0
97955	Male	65	Non-Hispanic White	High school diploma	Living alone	1.45	medium	1	135	107.4	171.5	yes	No	3.8	3.1	0.8	251	307.677	0.980645	1.22581	0.626239	Former	9120	active	Yes	No	39659	0.42187	1
97958	Female	24	Non-Hispanic Non-Hispanic White	High school diploma	Living alone	0.68	low	2	145	107.5	165	yes	No	3.4	2	0.4	271	460.7	0.68	1.7	0.651515	Never	5280	active	No	No	9422.26	0.120083	0
97963	Male	29	Non-Hispanic White	College diploma	Married/living with partner	1.79	medium	1	135	93.4	181.7	yes	No	2.2	2.5	0.4	190	167.2	0.352	0.88	0.514034	Current	27660	active	No	No	9861	0.918099	0
97972	Female	30	Non-Hispanic Non-Hispanic White	High school diploma	Living alone	0.29	low	1	136	132.3	166.3	yes	No	4	1.8	0.6	251	557.778	1.33333	2.22222	0.79555	Former	6720	active	No	No	5561.32	0.222631	0
97974	Female	44	Other Race	<High school diploma	Married/living with partner	1.97	medium	1	144	79.5	141.9	yes	No	5.6	2.4	0.7	299	697.667	1.63333	2.33333	0.560254	Never	0	inactive	No	No	1222.85	0.528639	0
97986	Female	29	Non-Hispanic Non-Hispanic White	College diploma	Married/living with partner	2.89	medium	2	146	118.8	165.6	yes	No	5.4	2.7	0.5	313	626	1	2	0.717391	Current	960	active	No	No	4059.02	1.57916	0
97995	Male	47	Mexican American	<High school diploma	Married/living with partner	2.39	medium	2	144	101.4	172.8	yes	No	4.7	2.1	0.5	274	613.238	1.11905	2.2381	0.586806	Never	0	inactive	No	No	4252.2	1.0697	0
98005	Male	67	Non-Hispanic White	High school diploma	Married/living with partner	1.7	medium	1	143	110.7	175.5	yes	No	5.8	1.6	0.7	172	623.5	2.5375	3.625	0.630769	Never	0	inactive	Yes	Yes	11883.8	0.678374	0
98008	Female	80	Non-Hispanic White	College diploma	Living alone	4.88	high	1	142	91.1	157.8	yes	No	2.9	3	0.5	259	250.367	0.483333	0.966667	0.577313	Never	2560	active	No	No	6211.04	0.243885	0
98018	Male	22	Non-Hispanic Non-Hispanic White	<High school diploma	Living alone	1.2	low	1	146	84.5	179.6	no	No	4.6	2	0.7	182	418.6	1.61	2.3	0.47049	Current	14400	active	No	No	5393.74	0.315583	0
98029	Female	66	Other Race	College diploma	Living alone	4.78	high	2	140	80.3	155.9	yes	No	4.2	2.5	0.6	303	509.04	1.008	1.68	0.515074	Never	3360	active	Yes	No	1998.95	0.192655	0
98030	Female	24	Non-Hispanic Non-Hispanic White	High school diploma	Living alone	1.14	low	2	146	78.3	150.9	yes	No	4.6	2.2	0.3	248	518.545	0.627273	2.09091	0.518887	Never	0	inactive	No	No	8265.7	0.195123	0
98032	Male	72	Non-Hispanic White	College diploma	Married/living with partner	5	high	1	139	97.9	177.9	yes	No	2.7	1.5	0.6	142	255.6	1.08	1.8	0.550309	Former	2580	active	Yes	Yes	18654.5	0.439846	0
98035	Female	35	Mexican American	High school diploma	Married/living with partner	1.79	medium	2	136	99.4	163.6	yes	No	3.1	2.2	0.3	246	346.636	0.422727	1.40909	0.607579	Never	14520	active	No	No	9901.22	0.47044	0
98043	Male	61	Non-Hispanic Non-Hispanic White	College diploma	Married/living with partner	4.25	high	2	147	96.7	177.6	yes	No	2.7	3.8	0.4	279	198.237	0.284211	0.710526	0.544482	Former	1560	active	No	No	1836.32	0.21507	0
98046	Female	49	Non-Hispanic White	<High school diploma	Living alone	0.64	low	1	135	119.7	164.8	yes	No	6.4	2.2	0.7	254	738.909	2.03636	2.90909	0.726335	Current	0	inactive	Yes	No	5000.95	0.81271	0
98056	Female	34	Non-Hispanic White	High school diploma	Married/living with partner	1.82	medium	1	142	109.8	164.6	yes	No	5.1	2.6	0.6	319	625.731	1.17692	1.96154	0.667072	Current	13920	active	No	No	12138.9	1.4485	0
98062	Female	80	Non-Hispanic White	High school diploma	Married/living with partner	2.92	medium	1	142	111.4	157.6	yes	No	3.8	1.9	0.6	221	442	1.2	2	0.706853	Former	0	inactive	Yes	Yes	4061.48	0.823018	0
98075	Female	66	Non-Hispanic White	College diploma	Living alone	5	high	1	141	94.9	175	yes	No	2.8	0.9	0.3	126	392	0.933333	3.11111	0.542286	Never	1200	active	Yes	No	32152.3	0.385285	0
98081	Male	56	Non-Hispanic Non-Hispanic White	<High school diploma	Married/living with partner	0.81	low	1	140	76.3	163.5	yes	No	1.3	0.7	0.2	180	334.286	0.371429	1.85714	0.466667	Never	6720	active	No	No	2709.8	0.306816	0
98088	Male	33	Non-Hispanic White	College diploma	Living alone	5	high	1	135	100.8	179	yes	No	3	2.3	0.4	215	280.435	0.521739	1.30435	0.563128	Never	10560	active	Yes	No	17133.3	0.492283	0
98092	Male	41	Mexican American	<High school diploma	Living alone	2.89	medium	2	136	105.2	162.5	yes	No	6.2	2.5	0.9	225	558	2.232	2.48	0.647385	Current	3200	active	No	Yes	6130.19	0.908671	0
98100	Male	33	Non-Hispanic White	College diploma	Married/living with partner	5	high	2	147	123.5	171.3	yes	No	2.7	3	0.5	263	236.7	0.45	0.9	0.720957	Never	0	inactive	Yes	No	36277.6	1.09028	0
98102	Female	35	Other Race	College diploma	Married/living with partner	3.86	high	1	141	97.4	157.3	yes	No	5.6	3	0.5	350	653.333	0.933333	1.86667	0.619199	Never	720	active	No	No	3069.04	0.440724	0
98103	Male	37	Non-Hispanic Non-Hispanic White	College diploma	Living alone	0.34	low	2	144	85.6	175	yes	No	4.1	2.1	0.9	288	562.286	1.75714	1.95238	0.489143	Current	2760	active	No	No	6368.61	0.213249	0
98106	Female	76	Other Hispanic	<High school diploma	Married/living with partner	1.54	medium	1	140	89.7	149.1	no	No	4.4	2.9	0.7	222	336.828	1.06207	1.51724	0.60161	Never	0	inactive	Yes	No	2265.16	0.674342	1
98113	Female	25	Non-Hispanic White	College diploma	Married/living with partner	0.91	low	1	135	139	167	yes	No	5	1.9	0.4	276	726.316	1.05263	2.63158	0.832335	Former	0	inactive	Yes	No	15146.1	0.496128	0
98121	Male	73	Non-Hispanic White	College diploma	Married/living with partner	2.77	medium	1	140	98.3	173.7	yes	No	5	0.7	0.8	225	1607.14	5.71429	7.14286	0.565918	Former	7920	active	Yes	Yes	1658.57	0.54458	1
98130	Male	68	Non-Hispanic White	High school diploma	Married/living with partner	1.61	medium	2	139	126.3	167.5	yes	No	3.6	1.6	0.6	161	362.25	1.35	2.25	0.75403	Never	2880	active	Yes	No	3754.79	0.313518	0
98133	Female	80	Non-Hispanic White	<High school diploma	Living alone	2.88	medium	2	142	96	140.8	no	No	5.8	2.1	0.8	239	660.095	2.20952	2.7619	0.681818	Never	0	inactive	Yes	No	5690.86	0.242151	0
98135	Female	42	Non-Hispanic White	High school diploma	Living alone	0.69	low	1	147	135.7	163.3	yes	No	4.7	1.7	0.7	313	865.353	1.93529	2.76471	0.830986	Current	16320	active	No	No	11019	2.86264	0
98144	Female	45	Non-Hispanic White	College diploma	Living alone	2.43	medium	2	145	85.1	157.1	no	No	7.8	1.7	0.4	221	1014	1.83529	4.58824	0.541693	Never	240	inactive	No	No	27053.6	0.571442	0
98147	Male	29	Non-Hispanic White	College diploma	Married/living with partner	1.22	low	1	146	100.2	186.1	yes	No	1.9	1.9	0.5	205	205	0.5	1	0.53842	Never	1080	active	No	No	15373.9	0.410849	0
98148	Female	37	Non-Hispanic White	High school diploma	Living alone	0.76	low	1	142	82	161.6	yes	No	7.3	2.5	1	230	671.6	2.92	2.92	0.507426	Current	3840	active	No	No	8532.84	1.32542	0
98156	Female	46	Mexican American	<High school diploma	Living alone	1.1	low	2	141	93.6	154.4	yes	No	4.6	2.1	0.3	318	696.571	0.657143	2.19048	0.606218	Never	540	inactive	No	Yes	2917.2	4.0124	0
98168	Female	55	Mexican American	College diploma	Married/living with partner	5	high	1	148	86.6	173.6	yes	No	3.1	2.2	0.8	145	204.318	1.12727	1.40909	0.498848	Never	2880	active	No	No	5234.36	0.285704	0
98189	Male	43	Non-Hispanic White	College diploma	Married/living with partner	4.68	high	1	136	83.2	171	yes	No	3	2.1	0.6	262	374.286	0.857143	1.42857	0.48655	Never	23520	active	No	No	36541.3	0.098005	0
98195	Male	28	Non-Hispanic Non-Hispanic White	High school diploma	Married/living with partner	2.62	medium	1	146	85.7	183.1	yes	No	1.7	1.4	0.3	201	244.071	0.364286	1.21429	0.46805	Current	8160	active	Yes	No	6029.37	0.0835381	0
98204	Male	60	Non-Hispanic White	High school diploma	Married/living with partner	1.98	medium	1	135	84.2	182.9	yes	No	3.9	1	0.5	190	741	1.95	3.9	0.460361	Former	0	inactive	No	No	5118.93	0.275903	0
98208	Female	39	Non-Hispanic White	College diploma	Living alone	4.07	high	1	139	95.8	168.1	yes	No	9.9	3	0.7	259	854.7	2.31	3.3	0.569899	Current	1440	active	Yes	No	18767.6	0.624556	0
98225	Male	26	Non-Hispanic Non-Hispanic White	College diploma	Married/living with partner	2.07	medium	1	144	121.2	181.5	yes	No	7.4	1.4	0.8	247	1305.57	4.22857	5.28571	0.667769	Former	1920	active	Yes	No	6726.76	0.447909	0
98227	Female	61	Mexican American	<High school diploma	Married/living with partner	2.95	medium	1	140	104.4	157	yes	No	2.5	1.8	0.3	168	233.333	0.416667	1.38889	0.664968	Former	25920	active	Yes	No	1265.36	0.466428	0
98238	Female	44	Other Race	High school diploma	Living alone	1.02	low	1	138	107	166.5	yes	No	2.4	2.3	0.4	220	229.565	0.417391	1.04348	0.642643	Never	2400	active	No	No	4546.23	0.318721	1
98243	Male	35	Other Race	College diploma	Living alone	2.79	medium	2	135	102.7	168.9	yes	No	5.9	2.2	0.6	205	549.773	1.60909	2.68182	0.608052	Current	20160	active	No	No	2044.3	2.11373	0
98256	Female	25	Non-Hispanic Non-Hispanic White	High school diploma	Living alone	2.77	medium	1	144	94.2	163	yes	No	5.6	1.6	0.7	362	1267	2.45	3.5	0.577914	Never	16800	active	No	No	13199.8	0.187461	0
98257	Male	71	Non-Hispanic White	College diploma	Married/living with partner	3.43	medium	1	141	79.6	168.8	yes	No	4.4	2.3	1	202	386.435	1.91304	1.91304	0.471564	Current	20640	active	No	No	14611.1	0.336959	1
98262	Male	59	Non-Hispanic White	College diploma	Living alone	0.75	low	1	143	96.5	176.6	yes	No	2.6	1.9	0.5	225	307.895	0.684211	1.36842	0.546433	Never	2280	active	No	No	7780.06	0.337943	0
98270	Female	62	Non-Hispanic Non-Hispanic White	High school diploma	Living alone	1.35	medium	2	134	110.3	163.3	yes	No	2.6	1.9	0.4	224	306.526	0.547368	1.36842	0.675444	Former	3120	active	Yes	Yes	3775.37	0.128889	1
98271	Male	50	Other Race	College diploma	Married/living with partner	5	high	2	138	100	165.7	yes	No	2.3	2.6	0.6	218	192.846	0.530769	0.884615	0.6035	Never	360	inactive	No	No	2265.99	1.2425	0
98280	Female	31	Other Race	College diploma	Married/living with partner	4.93	high	2	145	93.9	161.4	no	No	5.4	2.5	0.6	414	894.24	1.296	2.16	0.581784	Never	480	inactive	No	Yes	5452.77	1.89112	0
98298	Female	28	Other Race	College diploma	Married/living with partner	3.38	medium	2	140	124.1	158.8	yes	No	5.7	2.3	0.6	261	646.826	1.48696	2.47826	0.781486	Former	8080	active	No	No	10187.6	0.54112	0
98301	Female	68	Non-Hispanic Non-Hispanic White	High school diploma	Living alone	5	high	1	143	112.1	163.2	yes	Yes	2.8	2.1	0.4	338	450.667	0.533333	1.33333	0.686887	Never	1440	active	Yes	Yes	4748.8	0.687535	1
98304	Female	79	Non-Hispanic White	College diploma	Living alone	2.43	medium	2	144	83	156.4	yes	No	2.7	1.7	0.5	242	384.353	0.794118	1.58824	0.530691	Former	1200	active	No	No	12403	0.159207	0
98309	Female	73	Non-Hispanic White	College diploma	Married/living with partner	3.65	high	2	139	93.4	163.2	yes	No	2.4	1	0.3	96	230.4	0.72	2.4	0.572304	Never	0	inactive	Yes	Yes	1227.4	1.05697	1
98314	Male	25	Non-Hispanic Non-Hispanic White	High school diploma	Living alone	0.31	low	1	143	106.1	175	yes	No	3.2	1.9	0.5	233	392.421	0.842105	1.68421	0.606286	Current	3360	active	Yes	No	8809.16	0.500313	0
98318	Male	40	Non-Hispanic White	High school diploma	Living alone	0.39	low	2	141	114.9	185.2	yes	No	4.2	3.1	0.7	227	307.548	0.948387	1.35484	0.62041	Never	12240	active	Yes	No	2959.41	7.85078	1
98334	Male	62	Other Race	College diploma	Married/living with partner	4.56	high	2	135	101.7	172.8	yes	No	3	1.3	0.4	187	431.538	0.923077	2.30769	0.588542	Never	2520	active	Yes	No	974.118	0.728653	0
98343	Female	31	Non-Hispanic Non-Hispanic White	College diploma	Living alone	1.18	low	1	144	81.6	151.8	yes	No	7.7	1.4	1.3	272	1496	7.15	5.5	0.537549	Never	160	inactive	No	Yes	2202.65	0.192934	0
98369	Male	69	Non-Hispanic White	High school diploma	Married/living with partner	1.67	medium	1	140	95	180.1	yes	No	4.2	1.3	0.7	455	1470	2.26154	3.23077	0.527485	Former	4080	active	Yes	Yes	3899.54	0.265309	1
98385	Male	61	Non-Hispanic White	College diploma	Married/living with partner	5	high	1	135	111.5	171.2	yes	No	2.5	1.9	0.3	168	221.053	0.394737	1.31579	0.651285	Never	12120	active	Yes	No	13854.7	1.09108	0
98412	Female	67	Non-Hispanic Non-Hispanic White	College diploma	Living alone	2.46	medium	1	143	108.2	155.3	no	No	4.1	2.7	0.6	254	385.704	0.911111	1.51852	0.696716	Never	1080	active	Yes	Yes	1918.47	0.354221	0
98416	Female	25	Other Race	College diploma	Living alone	0.66	low	2	137	70.5	159	no	No	4.3	1.5	0.4	197	564.733	1.14667	2.86667	0.443396	Never	1920	active	No	No	3076.55	0.116128	0
98420	Female	27	Non-Hispanic White	College diploma	Married/living with partner	5	high	1	141	73.9	171.2	yes	No	4	2.3	0.6	221	384.348	1.04348	1.73913	0.431659	Never	3720	active	No	No	23588	0.0815165	0
98423	Female	80	Non-Hispanic Non-Hispanic White	High school diploma	Living alone	0.91	low	2	145	88.3	164.2	yes	No	2.8	1.5	0.5	224	418.133	0.933333	1.86667	0.537759	Never	0	inactive	Yes	No	2939.97	0.191832	1
98437	Female	32	Non-Hispanic Non-Hispanic White	College diploma	Living alone	0.6	low	2	144	87.8	164.3	yes	No	5.1	2.9	0.8	220	386.897	1.4069	1.75862	0.534388	Current	11520	active	No	No	2984.07	0.256367	0
98444	Female	59	Non-Hispanic White	High school diploma	Married/living with partner	0.65	low	1	145	113.4	154.6	yes	No	4.9	2.3	0.6	263	560.304	1.27826	2.13043	0.733506	Current	1680	active	No	No	11191.9	1.9568	1
98452	Male	52	Other Race	High school diploma	Married/living with partner	3.04	medium	2	135	83.8	179.2	yes	No	2.1	1.7	0.5	128	158.118	0.617647	1.23529	0.467634	Former	13440	active	Yes	No	4866.97	0.0806053	0
98463	Female	66	Non-Hispanic White	College diploma	Living alone	0.04	low	2	142	107.8	165.7	yes	No	2.9	1.9	0.5	284	433.474	0.763158	1.52632	0.650573	Former	11760	active	No	No	10635.1	0.464872	0
98474	Male	35	Non-Hispanic Non-Hispanic White	College diploma	Living alone	2.43	medium	1	147	79.8	181.8	yes	No	4.1	1.7	0.6	205	494.412	1.44706	2.41176	0.438944	Never	13200	active	Yes	No	2409.59	0.205506	0
98483	Female	26	Non-Hispanic White	College diploma	Married/living with partner	0.61	low	1	142	77.1	157.9	yes	No	4.5	1.5	0.5	238	714	1.5	3	0.488284	Never	7600	active	No	No	12766.2	0.280342	0
98485	Male	21	Other Race	High school diploma	Married/living with partner	0.21	low	2	143	73.3	174.7	yes	No	3.2	1.9	0.6	314	528.842	1.01053	1.68421	0.419576	Never	24000	active	No	No	6090.65	0.287169	0
98494	Female	25	Other Race	College diploma	Married/living with partner	5	high	1	135	77	165	yes	No	5.2	2.1	0.4	261	646.286	0.990476	2.47619	0.466667	Never	1920	active	No	No	10297.1	0.1652	0
98495	Male	48	Non-Hispanic White	High school diploma	Married/living with partner	1.81	medium	1	141	87.6	176.1	yes	No	2.4	1.5	0.4	196	313.6	0.64	1.6	0.497445	Never	4920	active	No	No	5237.63	0.166564	0
98500	Female	56	Other Hispanic	College diploma	Married/living with partner	0.59	low	1	140	89.4	147.6	yes	No	4.2	4.2	0.4	213	213	0.4	1	0.605691	Never	0	inactive	Yes	Yes	4446.1	0.375784	0
98501	Female	68	Other Hispanic	College diploma	Married/living with partner	1.73	medium	2	138	111.7	155.2	no	No	6.6	1.9	0.4	265	920.526	1.38947	3.47368	0.719716	Never	4200	active	No	Yes	2497.39	0.348053	1
98512	Female	32	Non-Hispanic Non-Hispanic White	College diploma	Living alone	0.06	low	1	147	128.8	161.1	yes	Yes	2.1	2.5	0.5	319	267.96	0.42	0.84	0.799503	Never	26880	active	No	Yes	4071.64	0.571291	0
98526	Male	67	Non-Hispanic White	College diploma	Married/living with partner	5	high	2	136	89.4	167.4	yes	No	3.3	0.9	0.4	255	935	1.46667	3.66667	0.53405	Former	4080	active	No	No	18465.6	0.474971	0
98531	Female	20	Non-Hispanic White	High school diploma	Living alone	1.49	medium	1	144	67.7	152.4	yes	No	4.6	3.1	0.6	193	286.387	0.890323	1.48387	0.444226	Never	6720	active	No	No	25655.7	0.179183	0
98545	Female	36	Other Hispanic	High school diploma	Married/living with partner	2.67	medium	2	136	85.5	156.4	yes	No	2.6	1.3	0.5	200	400	1	2	0.546675	Never	160	inactive	No	No	5836.07	0.203502	0
98548	Male	43	Other Hispanic	College diploma	Married/living with partner	0.68	low	2	144	99.1	155.4	yes	No	2.4	1.7	0.5	223	314.824	0.705882	1.41176	0.637709	Former	14520	active	Yes	No	14416.9	0.815006	0
98557	Male	80	Non-Hispanic Non-Hispanic White	<High school diploma	Married/living with partner	1.1	low	2	143	86.8	168.4	yes	No	1.8	1.8	0.7	154	154	0.7	1	0.515439	Current	0	inactive	Yes	No	2590.39	0.478929	0
98558	Female	63	Non-Hispanic Non-Hispanic White	College diploma	Married/living with partner	1.84	medium	1	147	99.5	161	no	No	3.3	1.5	0.4	256	563.2	0.88	2.2	0.618012	Never	0	inactive	No	Yes	2090.53	0.295707	0
98565	Female	57	Non-Hispanic White	College diploma	Living alone	1.47	medium	1	143	71.7	154.3	yes	No	5.9	2	0.8	221	651.95	2.36	2.95	0.464679	Current	0	inactive	No	No	5196.05	0.562861	1
98568	Male	78	Non-Hispanic White	High school diploma	Married/living with partner	2.04	medium	2	139	117.7	178.8	yes	No	3	1.6	0.5	257	481.875	0.9375	1.875	0.658277	Former	40	inactive	No	No	6721.65	0.655905	0
98569	Male	65	Other Hispanic	<High school diploma	Living alone	2.12	medium	1	140	93.5	168.2	yes	No	4.4	2.1	0.3	146	305.905	0.628571	2.09524	0.555886	Current	0	inactive	Yes	No	1065.19	0.536717	0
98592	Female	68	Other Race	High school diploma	Living alone	1.07	low	2	135	91.7	149.5	no	No	4.3	1.9	0.5	281	635.947	1.13158	2.26316	0.613378	Never	2880	active	Yes	No	1220.83	0.282027	1
98598	Male	65	Non-Hispanic Non-Hispanic White	<High school diploma	Living alone	0.7	low	2	145	89	167.9	yes	No	3.4	2	0.8	126	214.2	1.36	1.7	0.530077	Current	0	inactive	No	No	1382.57	0.484838	0
98610	Male	77	Non-Hispanic White	College diploma	Living alone	1.08	low	1	140	129.9	170.5	yes	No	7.5	2.1	0.9	188	671.429	3.21429	3.57143	0.761877	Former	1800	active	Yes	Yes	15681.1	2.72717	1
98611	Female	59	Other Hispanic	High school diploma	Living alone	2.9	medium	1	140	101	158.5	yes	No	1.7	1.4	0.3	239	290.214	0.364286	1.21429	0.637224	Never	30240	active	Yes	No	4676.92	0.340538	0
98622	Female	59	Non-Hispanic Non-Hispanic White	College diploma	Living alone	2.36	medium	2	148	111	163.2	yes	No	3.6	2.1	0.4	199	341.143	0.685714	1.71429	0.680147	Never	720	active	Yes	No	4917.93	0.241078	0
98630	Male	64	Non-Hispanic Non-Hispanic White	College diploma	Married/living with partner	3.03	medium	1	137	116.9	167.6	yes	No	2.2	1.5	0.3	206	302.133	0.44	1.46667	0.697494	Never	0	inactive	Yes	No	1682.54	1.05692	0
98661	Female	31	Non-Hispanic Non-Hispanic White	<High school diploma	Living alone	2.43	medium	1	147	63.2	168.5	yes	No	1.1	2.5	0.4	186	81.84	0.176	0.44	0.375074	Current	1080	active	No	No	2370.11	0.152581	0
98677	Male	23	Non-Hispanic White	High school diploma	Living alone	3.09	medium	2	146	121.3	175.3	yes	No	3.6	2.6	0.5	333	461.077	0.692308	1.38462	0.691957	Never	14400	active	No	No	10208.4	0.572654	0
98680	Female	37	Non-Hispanic Non-Hispanic White	College diploma	Living alone	2.07	medium	2	148	124.6	154.7	yes	No	4.5	1.7	0.8	351	929.118	2.11765	2.64706	0.80543	Never	2760	active	No	No	4330.69	0.308513	0
98689	Male	35	Non-Hispanic White	<High school diploma	Living alone	1.1	low	1	137	107	171.4	yes	No	5.8	1.6	0.7	258	935.25	2.5375	3.625	0.624271	Current	29280	active	Yes	No	5447.95	0.747851	0
98699	Female	68	Other Hispanic	High school diploma	Married/living with partner	4	high	1	134	79.4	164	no	No	6	2.5	0.8	254	609.6	1.92	2.4	0.484146	Never	1680	active	No	No	4318.37	0.307954	1
98707	Female	63	Non-Hispanic Non-Hispanic White	College diploma	Living alone	4.25	high	2	148	93	168.4	yes	No	1.9	1.9	0.4	254	254	0.4	1	0.552257	Current	320	inactive	No	No	2452.82	0.260204	0
98726	Male	38	Non-Hispanic White	College diploma	Married/living with partner	5	high	1	138	95.8	187.2	yes	No	1.9	1.6	0.5	202	239.875	0.59375	1.1875	0.511752	Never	4320	active	No	No	28219.4	0.131485	0
98729	Female	30	Other Race	College diploma	Living alone	5	high	2	140	69.8	149.2	yes	No	5.1	1.5	0.5	298	1013.2	1.7	3.4	0.467828	Never	18480	active	No	No	5525.87	0.130776	0
98733	Female	36	Non-Hispanic White	College diploma	Married/living with partner	2.15	medium	1	147	97.1	166.7	yes	No	2.9	2.3	0.6	269	339.174	0.756522	1.26087	0.582484	Former	1080	active	No	No	12903.2	0.916218	0
98743	Male	61	Other Race	College diploma	Married/living with partner	5	high	2	138	89.6	164.6	yes	No	2.3	1.8	0.5	199	254.278	0.638889	1.27778	0.54435	Never	1360	active	Yes	Yes	2087.04	0.292447	0
98747	Male	21	Non-Hispanic Non-Hispanic White	High school diploma	Living alone	1.07	low	2	143	77.4	175.2	yes	No	2.1	3	0.5	223	156.1	0.35	0.7	0.441781	Never	2760	active	No	No	7317.68	0.10805	0
98748	Male	50	Non-Hispanic White	College diploma	Living alone	1.4	medium	2	143	77.9	172.4	yes	No	4.1	1.8	0.6	288	656	1.36667	2.27778	0.451856	Current	2520	active	No	No	7598.74	0.420791	0
98751	Male	42	Other Race	High school diploma	Married/living with partner	2.24	medium	1	138	75.2	160.4	yes	No	2.4	2.1	0.4	180	205.714	0.457143	1.14286	0.468828	Never	400	inactive	No	No	3991.32	0.667555	0
98752	Male	68	Non-Hispanic Non-Hispanic White	College diploma	Married/living with partner	2.43	medium	2	146	125.6	178.7	yes	No	7.6	2.6	0.9	316	923.692	2.63077	2.92308	0.702854	Former	0	inactive	Yes	Yes	1522.17	0.493658	1
98762	Male	28	Non-Hispanic White	College diploma	Married/living with partner	2.09	medium	1	146	111.5	178.6	yes	Yes	2.4	1.9	0.6	212	267.789	0.757895	1.26316	0.6243	Never	21600	active	No	No	11163.2	3.85016	0
98772	Male	59	Non-Hispanic White	College diploma	Living alone	0.74	low	2	143	108.5	177.5	yes	No	4.1	1.7	0.4	356	858.588	0.964706	2.41176	0.611268	Former	21600	active	No	No	5570.15	0.557111	1
98775	Male	26	Other Race	College diploma	Living alone	5	high	1	141	95.6	169.3	yes	No	5.8	2	0.6	185	536.5	1.74	2.9	0.564678	Never	4920	active	Yes	No	3234	0.209842	0
98778	Male	42	Other Race	College diploma	Married/living with partner	4.17	high	1	148	80.9	168.5	yes	No	2.6	1.3	0.3	148	296	0.6	2	0.480119	Never	2080	active	No	No	2454.44	0.132305	0
98780	Male	45	Non-Hispanic Non-Hispanic White	High school diploma	Married/living with partner	0.36	low	2	136	121.2	181.3	yes	No	5.4	2.4	0.8	178	400.5	1.8	2.25	0.668505	Current	10800	active	No	No	6953.75	1.39097	0
98781	Female	55	Non-Hispanic White	College diploma	Living alone	1.52	medium	2	143	111.1	162.1	yes	No	3.8	2	0.4	243	461.7	0.76	1.9	0.685379	Former	0	inactive	No	No	6558.35	1.29691	1
98788	Female	20	Mexican American	College diploma	Living alone	2.72	medium	2	138	118.4	167.7	yes	No	8.2	1.3	0.4	261	1646.31	2.52308	6.30769	0.706023	Never	1440	active	No	No	6273.9	0.992034	0
98791	Male	54	Non-Hispanic White	College diploma	Living alone	3.98	high	1	146	86.2	184.9	yes	No	2.1	1.5	0.6	168	235.2	0.84	1.4	0.466198	Never	2400	active	No	No	42787.9	0.223423	0
98793	Female	46	Other Race	College diploma	Married/living with partner	5	high	1	143	78.1	152.8	yes	No	3.6	1.4	0.5	190	488.571	1.28571	2.57143	0.511126	Never	0	inactive	No	No	2112.83	0.317802	0
98804	Female	39	Other Race	College diploma	Living alone	1.1	low	1	138	100	154.6	yes	No	3.6	1.2	0.5	233	699	1.5	3	0.646831	Never	0	inactive	Yes	No	4724.96	1.14724	0
98815	Female	75	Non-Hispanic White	College diploma	Married/living with partner	4.01	high	2	142	74.6	151.3	yes	No	3.1	2.2	0.5	188	264.909	0.704545	1.40909	0.49306	Never	0	inactive	Yes	No	17207.7	0.388749	1
98819	Female	58	Non-Hispanic Non-Hispanic White	High school diploma	Living alone	0.49	low	2	147	125.5	155.7	yes	No	5.3	2.6	0.5	329	670.654	1.01923	2.03846	0.806037	Never	0	inactive	Yes	Yes	7534.13	0.851539	0
98824	Male	24	Other Race	<High school diploma	Living alone	1.5	medium	2	142	106.4	173.6	yes	No	5.8	1.7	0.7	345	1177.06	2.38824	3.41176	0.612903	Current	0	inactive	No	No	6811.05	1.24205	0
98828	Female	29	Non-Hispanic Non-Hispanic White	College diploma	Living alone	0.61	low	1	145	122	162.9	yes	No	2.3	2.3	0.5	293	293	0.5	1	0.748926	Never	14080	active	No	No	3547.42	0.406307	0
98832	Female	48	Non-Hispanic Non-Hispanic White	College diploma	Living alone	1.96	medium	1	145	89.9	171.9	yes	No	3.4	3.6	0.8	272	256.889	0.755556	0.944444	0.522978	Never	5280	active	No	No	3116.69	0.312995	0
98840	Female	50	Other Race	College diploma	Living alone	1.22	low	1	136	103.5	159.3	yes	No	3.9	10.6	0.7	401	147.538	0.257547	0.367925	0.649718	Never	360	inactive	Yes	No	5982.84	0.433755	0
98843	Male	56	Non-Hispanic White	High school diploma	Living alone	0.62	low	2	145	86.7	163.3	yes	No	3.7	2.2	0.6	251	422.136	1.00909	1.68182	0.530925	Current	13200	active	No	No	16858.7	1.04031	0
98846	Female	47	Non-Hispanic White	<High school diploma	Married/living with partner	0.58	low	2	137	97.2	169.2	yes	No	3.8	2.2	0.3	301	519.909	0.518182	1.72727	0.574468	Current	720	active	No	No	4160.82	0.134043	0
98847	Male	52	Non-Hispanic White	College diploma	Living alone	1.57	medium	2	142	123.4	177.5	no	No	4.1	1.4	0.5	177	518.357	1.46429	2.92857	0.695211	Never	16080	active	Yes	No	3860.43	0.577812	0
98865	Male	36	Non-Hispanic White	College diploma	Living alone	5	high	2	145	86.8	179.5	yes	No	2.6	2.5	0.5	215	223.6	0.52	1.04	0.483565	Never	2600	active	No	No	19223.8	0.350585	0
98869	Male	75	Other Race	College diploma	Married/living with partner	1.15	low	2	138	98.9	178.7	yes	No	3.3	1.6	0.6	181	373.312	1.2375	2.0625	0.553442	Never	960	active	Yes	Yes	1761.7	0.507413	1
98877	Male	39	Other Race	<High school diploma	Married/living with partner	4.17	high	1	136	86.6	164.1	no	No	2.1	1.8	0.4	193	225.167	0.466667	1.16667	0.527727	Never	2880	active	Yes	No	5855	0.839566	0
98892	Male	55	Non-Hispanic White	High school diploma	Married/living with partner	2.15	medium	1	135	83.9	177.5	yes	No	2.1	1.4	0.5	124	186	0.75	1.5	0.472676	Current	10320	active	Yes	No	67966.8	0.150035	0
98902	Female	56	Other Race	College diploma	Married/living with partner	5	high	1	148	74.4	165.2	yes	No	2.6	2	0.3	220	286	0.39	1.3	0.450363	Never	1400	active	No	No	2587.73	0.127573	0
98904	Female	51	Non-Hispanic White	College diploma	Married/living with partner	5	high	2	144	71.2	157.8	yes	No	1.9	0.9	0.3	147	310.333	0.633333	2.11111	0.451204	Never	1680	active	No	No	69478.9	0.099666	0
98907	Male	56	Mexican American	College diploma	Living alone	1.69	medium	2	147	93.3	177.2	yes	No	4.1	1.3	0.5	202	637.077	1.57692	3.15385	0.526524	Never	2720	active	No	No	5409.27	0.858149	1
98910	Male	22	Non-Hispanic Non-Hispanic White	College diploma	Living alone	2.45	medium	1	141	73	179.4	yes	No	1.6	2.5	0.4	194	124.16	0.256	0.64	0.406912	Never	3760	active	No	No	5001.07	0.177795	0
98920	Male	23	Non-Hispanic White	College diploma	Living alone	0.71	low	2	139	97.5	187	yes	No	4.6	3	0.5	289	443.133	0.766667	1.53333	0.52139	Current	28800	active	Yes	No	7181	0.216789	0
98921	Female	26	Non-Hispanic White	College diploma	Living alone	2.06	medium	1	147	103.9	164	yes	No	3.8	2.1	0.6	351	635.143	1.08571	1.80952	0.633537	Never	2160	active	No	No	16435.7	1.54179	0
98922	Male	80	Non-Hispanic White	College diploma	Living alone	5	high	2	136	85.1	181.7	yes	Yes	8.3	1.1	0.7	225	1697.73	5.28182	7.54545	0.468354	Never	1440	active	Yes	No	6935.06	0.381685	0
98924	Male	60	Other Hispanic	College diploma	Married/living with partner	2.82	medium	1	140	87.5	177.8	yes	No	2.4	1.4	0.5	179	306.857	0.857143	1.71429	0.492126	Former	0	inactive	Yes	No	1560.03	0.305264	0
98925	Female	21	Mexican American	High school diploma	Married/living with partner	1.11	low	2	136	114.4	167.5	yes	No	7.7	2.5	0.6	256	788.48	1.848	3.08	0.682985	Never	5760	active	No	No	7867.83	0.750684	0
98931	Female	68	Non-Hispanic Non-Hispanic White	College diploma	Living alone	3.73	high	1	143	81.5	156.7	no	No	1.7	1.7	0.3	180	180	0.3	1	0.520102	Never	2160	active	Yes	No	3157.86	0.0847177	0
98932	Male	45	Other Hispanic	<High school diploma	Married/living with partner	3.32	medium	2	148	107.2	158.4	yes	No	3.4	2.3	0.6	278	410.957	0.886957	1.47826	0.676768	Never	1440	active	Yes	No	4522.07	1.88112	0
98933	Female	46	Non-Hispanic White	College diploma	Living alone	5	high	1	141	74	163.7	yes	No	2.1	1.1	0.4	189	360.818	0.763636	1.90909	0.452046	Never	3360	active	No	No	17827.5	0.177625	0
98944	Male	27	Non-Hispanic White	College diploma	Married/living with partner	1.42	medium	1	140	116.9	178.6	yes	No	3.6	1.9	0.5	189	358.105	0.947368	1.89474	0.654535	Never	20400	active	No	No	8279.75	0.648524	0
98948	Male	33	Non-Hispanic White	College diploma	Married/living with partner	3.79	high	1	136	123.1	181.9	yes	No	4.5	2.7	0.7	156	260	1.16667	1.66667	0.676745	Former	9200	active	Yes	No	32745.8	0.439085	0
98958	Female	23	Non-Hispanic White	High school diploma	Married/living with partner	1.35	medium	2	141	72.4	149	yes	No	4.6	2	0.7	183	420.9	1.61	2.3	0.485906	Former	2400	active	No	No	12939	0.353386	0
98972	Female	67	Non-Hispanic White	College diploma	Married/living with partner	1.73	medium	2	142	92.1	166.3	yes	No	2.7	1.3	0.4	203	421.615	0.830769	2.07692	0.553818	Never	0	inactive	No	No	5532.32	0.42194	1
98981	Male	31	Non-Hispanic Non-Hispanic White	High school diploma	Married/living with partner	0.61	low	1	144	67.2	174.2	yes	No	5.4	2.9	0.5	157	292.345	0.931034	1.86207	0.385763	Former	14880	active	No	No	4238.34	0.119173	0
98982	Female	25	Non-Hispanic Non-Hispanic White	College diploma	Married/living with partner	2.06	medium	2	140	72.9	158.4	yes	No	3.5	3.2	0.6	261	285.469	0.65625	1.09375	0.460227	Never	0	inactive	No	No	3458.91	0.0976523	0
98988	Female	59	Mexican American	<High school diploma	Married/living with partner	0.4	low	2	137	114	157.5	no	No	4.4	1.8	0.4	226	552.444	0.977778	2.44444	0.72381	Never	240	inactive	Yes	Yes	3609.74	1.19497	0
98994	Male	30	Other Race	College diploma	Married/living with partner	3.18	medium	1	137	119.3	185	yes	No	4	4.7	0.7	251	213.617	0.595745	0.851064	0.644865	Never	17280	active	Yes	No	5090.4	0.473915	0
98995	Female	55	Other Hispanic	College diploma	Married/living with partner	2.73	medium	1	140	93.1	172.2	yes	No	2.2	1.5	0.3	226	331.467	0.44	1.46667	0.54065	Former	10560	active	No	No	3237.47	0.317751	0
98998	Female	51	Non-Hispanic Non-Hispanic White	College diploma	Married/living with partner	1.58	medium	2	144	103.3	159.2	yes	No	2.2	2.1	0.4	150	157.143	0.419048	1.04762	0.648869	Never	960	active	No	No	2985.67	0.336711	0
99001	Male	37	Other Race	College diploma	Married/living with partner	5	high	2	143	100	166.1	yes	No	5.2	2.6	0.5	236	472	1	2	0.602047	Never	6000	active	Yes	No	4542.59	0.688616	0
99005	Female	26	Non-Hispanic Non-Hispanic White	High school diploma	Living alone	1.82	medium	1	139	115.3	168.1	yes	No	4.1	4.7	0.6	281	245.128	0.523404	0.87234	0.685901	Never	15280	active	No	No	7608.63	0.62431	0
99018	Female	68	Non-Hispanic White	College diploma	Married/living with partner	1.61	medium	2	139	104.7	161	yes	Yes	3.2	1.1	0.5	215	625.455	1.45455	2.90909	0.650311	Never	6840	active	No	No	4121.83	1.1416	0
99019	Female	41	Mexican American	High school diploma	Living alone	2.49	medium	1	135	143.5	168.4	yes	No	4.3	2.8	0.5	262	402.357	0.767857	1.53571	0.852138	Current	0	inactive	No	No	8003.4	0.688746	1
99023	Male	32	Non-Hispanic White	College diploma	Living alone	5	high	2	144	83.7	180	yes	No	5	1.3	0.4	217	834.615	1.53846	3.84615	0.465	Never	2280	active	No	No	47134.8	0.314871	0
99024	Female	38	Other Race	College diploma	Married/living with partner	5	high	2	145	77	166.7	yes	No	3.1	1.2	0.3	245	632.917	0.775	2.58333	0.461908	Former	2800	active	No	No	2229.34	0.109978	0
99028	Female	42	Mexican American	College diploma	Living alone	1.22	low	2	143	98.3	155.2	yes	No	5.7	5.3	0.6	278	298.981	0.645283	1.07547	0.633376	Current	400	inactive	No	No	5409.59	0.306005	1
99058	Female	64	Other Race	<High school diploma	Living alone	2.08	medium	1	148	77	156.2	yes	No	2.5	2.7	0.3	192	177.778	0.277778	0.925926	0.492958	Never	240	inactive	Yes	No	2298.52	0.270423	0
99067	Male	39	Non-Hispanic White	College diploma	Married/living with partner	1.61	medium	1	142	78.2	174	yes	No	1.8	1	0.3	122	219.6	0.54	1.8	0.449425	Never	240	inactive	No	No	7943.32	0.19119	0
99069	Female	80	Non-Hispanic Non-Hispanic White	<High school diploma	Living alone	0.68	low	1	147	119	153.5	yes	No	1.8	2.9	0.4	153	94.9655	0.248276	0.62069	0.775244	Former	0	inactive	Yes	Yes	2457.45	0.931544	0
99083	Male	78	Non-Hispanic White	High school diploma	Married/living with partner	1.43	medium	2	143	86.3	175.5	yes	No	4.3	1.8	0.8	262	625.889	1.91111	2.38889	0.491738	Never	7680	active	Yes	No	7308.14	0.229591	0
99089	Female	25	Non-Hispanic Non-Hispanic White	College diploma	Living alone	3.81	high	1	144	76.1	158.2	yes	No	1.8	1.7	0.3	297	314.471	0.317647	1.05882	0.481037	Never	2280	active	No	No	4800.27	0.0942832	0
99099	Female	45	Mexican American	<High school diploma	Living alone	1.64	medium	2	137	111	156.3	yes	No	4.1	1.7	0.6	306	738	1.44706	2.41176	0.710173	Current	0	inactive	Yes	Yes	2365.09	1.08332	0
99108	Male	51	Non-Hispanic White	College diploma	Married/living with partner	1.92	medium	2	143	97	180.8	yes	No	1.9	1.5	0.5	228	288.8	0.633333	1.26667	0.536504	Current	2400	active	Yes	No	5918.95	0.166912	1
99110	Female	20	Mexican American	High school diploma	Living alone	0.58	low	1	146	70.5	146.6	yes	No	2.8	2.2	0.4	249	316.909	0.509091	1.27273	0.4809	Never	7200	active	No	No	8364.28	0.216405	0
99121	Female	20	Mexican American	College diploma	Married/living with partner	0.49	low	2	148	99.9	158.1	no	No	5.2	3.4	0.7	422	645.412	1.07059	1.52941	0.631879	Never	0	inactive	No	No	3509.57	0.575871	0
99125	Female	20	Other Race	College diploma	Living alone	5	high	2	138	73.4	148.6	yes	No	3.4	2.5	0.7	307	417.52	0.952	1.36	0.493943	Never	1920	active	No	No	4970.07	0.264095	0
99127	Female	67	Other Race	<High school diploma	Living alone	2.47	medium	2	145	84.6	151.6	yes	No	3.2	2.2	0.4	289	420.364	0.581818	1.45455	0.558047	Never	4320	active	Yes	No	3142.55	0.244478	1
99134	Male	71	Non-Hispanic Non-Hispanic White	College diploma	Living alone	0.79	low	2	137	73.5	165.8	yes	No	2.7	2.3	0.4	287	336.913	0.469565	1.17391	0.443305	Current	42960	active	Yes	No	1086.53	0.334772	0
99136	Male	40	Non-Hispanic Non-Hispanic White	College diploma	Married/living with partner	1.63	medium	1	145	98.6	173.6	yes	No	2.5	1.6	0.4	192	300	0.625	1.5625	0.567972	Never	2000	active	No	No	3325.43	0.198986	0
99138	Male	31	Non-Hispanic Non-Hispanic White	College diploma	Living alone	0.41	low	2	145	83.4	175.6	yes	No	5.4	1.1	0.7	180	883.636	3.43636	4.90909	0.474943	Never	4800	active	Yes	No	4146.63	0.108103	0
99153	Female	53	Other Race	College diploma	Married/living with partner	1.79	medium	1	135	93.3	165.3	yes	No	1.9	1.6	0.4	111	131.812	0.475	1.1875	0.564428	Current	0	inactive	Yes	Yes	5111.95	0.168411	0
99154	Male	24	Other Race	<High school diploma	Married/living with partner	2.04	medium	2	140	105.7	175.1	no	No	3.3	1.9	0.7	314	545.368	1.21579	1.73684	0.603655	Never	32160	active	No	No	1714.77	1.66237	0
99157	Female	62	Other Race	High school diploma	Married/living with partner	4.93	high	2	148	76.2	154.9	yes	No	2.7	1.6	0.3	180	303.75	0.50625	1.6875	0.49193	Never	0	inactive	No	Yes	2118.45	0.248437	0
99160	Female	43	Other Race	College diploma	Living alone	2.16	medium	1	143	92.4	165.9	yes	No	4.5	1.8	0.6	152	380	1.5	2.5	0.556962	Former	8640	active	No	No	3805.44	0.381199	1
99167	Female	50	Non-Hispanic Non-Hispanic White	College diploma	Living alone	5	high	1	144	85.8	160.4	yes	No	2.1	1.4	0.3	413	619.5	0.45	1.5	0.534913	Never	600	active	Yes	No	2031.65	0.168043	0
99171	Male	37	Other Hispanic	High school diploma	Married/living with partner	1.22	low	1	137	97.5	172.3	yes	No	6.6	1.7	0.7	248	962.824	2.71765	3.88235	0.565873	Never	13680	active	No	No	11089.6	0.553398	0
99181	Male	29	Non-Hispanic White	College diploma	Living alone	0.58	low	2	146	92.2	176.3	yes	No	3.4	1.9	0.4	220	393.684	0.715789	1.78947	0.522972	Never	0	inactive	No	No	10172.8	0.45094	0
99188	Male	80	Non-Hispanic White	College diploma	Married/living with partner	3.95	high	2	139	103.1	176.3	yes	No	5.6	1.2	0.7	247	1152.67	3.26667	4.66667	0.584799	Never	0	inactive	Yes	Yes	2742.66	0.438599	0
99191	Female	80	Non-Hispanic White	High school diploma	Married/living with partner	1.46	medium	2	142	92	155.8	yes	No	1.8	1.1	0.4	262	428.727	0.654545	1.63636	0.590501	Former	0	inactive	Yes	No	6840.71	0.418271	0
99197	Female	28	Other Hispanic	High school diploma	Married/living with partner	1.19	low	2	141	81.8	154.7	yes	No	3.6	1.5	0.4	245	588	0.96	2.4	0.528765	Former	2880	active	No	No	9415.11	0.620172	0
99220	Female	78	Non-Hispanic Non-Hispanic White	High school diploma	Living alone	0.75	low	2	145	102.4	162.5	yes	No	5.2	1.9	0.8	381	1042.74	2.18947	2.73684	0.630154	Current	0	inactive	Yes	No	2959.29	0.131998	1
99224	Female	46	Non-Hispanic Non-Hispanic White	College diploma	Married/living with partner	2.03	medium	1	141	94.4	161.8	yes	No	2.5	1.5	0.3	301	501.667	0.5	1.66667	0.583436	Never	1440	active	No	No	2612.45	0.201869	0
99231	Female	37	Non-Hispanic White	High school diploma	Married/living with partner	5	high	2	142	101.5	160.4	yes	No	3.7	2.3	0.5	259	416.652	0.804348	1.6087	0.632793	Never	0	inactive	No	No	21295.4	0.764699	0
99237	Female	44	Other Race	College diploma	Married/living with partner	4.25	high	2	138	88.6	150.3	yes	Yes	2.5	2.1	0.5	157	186.905	0.595238	1.19048	0.589488	Never	8520	active	Yes	No	4549.16	0.281044	1
99246	Female	39	Non-Hispanic Non-Hispanic White	College diploma	Married/living with partner	4.74	high	2	147	103	155	yes	No	1	1.5	0.2	275	183.333	0.133333	0.666667	0.664516	Never	0	inactive	No	No	5467.14	0.436906	0
99247	Male	23	Non-Hispanic White	<High school diploma	Living alone	0.8	low	2	146	117.5	174.8	yes	No	4.6	2.9	0.7	290	460	1.11034	1.58621	0.672197	Never	0	inactive	No	No	7584.75	0.235501	0
99251	Male	45	Non-Hispanic White	College diploma	Married/living with partner	4.08	high	2	137	103.9	175	yes	No	2.9	2.3	0.5	327	412.304	0.630435	1.26087	0.593714	Never	1920	active	No	No	55464.3	1.23446	0
99257	Female	49	Mexican American	High school diploma	Married/living with partner	1.78	medium	2	141	120	155	yes	No	3.9	2.6	0.5	499	748.5	0.75	1.5	0.774194	Never	720	active	No	No	6815.36	0.852882	0
99260	Female	48	Non-Hispanic White	College diploma	Living alone	4.62	high	1	135	128.5	159.2	yes	No	8	2.7	0.5	296	877.037	1.48148	2.96296	0.807161	Never	720	active	Yes	Yes	19630.7	1.33412	1
99279	Female	34	Mexican American	<High school diploma	Married/living with partner	1.91	medium	1	136	100	150.7	yes	No	3	2.4	0.5	338	422.5	0.625	1.25	0.66357	Former	640	active	No	No	5920.06	1.01376	0
99285	Female	61	Mexican American	High school diploma	Married/living with partner	4.19	high	2	135	109.2	158.3	yes	No	3.5	2.6	0.4	206	277.308	0.538462	1.34615	0.689829	Never	2160	active	No	Yes	2466.37	1.21735	0
99287	Male	57	Mexican American	College diploma	Married/living with partner	4.31	high	1	148	122.1	160.1	yes	No	4.1	1.9	0.4	225	485.526	0.863158	2.15789	0.762648	Never	8160	active	Yes	Yes	6413.8	3.22413	0
99289	Female	64	Non-Hispanic White	College diploma	Living alone	2.82	medium	1	142	109.1	152.7	no	No	4.1	2	0.5	228	467.4	1.025	2.05	0.714473	Never	5760	active	Yes	No	10400.9	0.358888	0
99305	Male	50	Other Hispanic	College diploma	Married/living with partner	2.73	medium	2	140	105	171.6	yes	No	4.3	1.4	0.5	177	543.643	1.53571	3.07143	0.611888	Never	11520	active	No	Yes	3437.87	1.56159	0
99312	Male	70	Non-Hispanic White	College diploma	Married/living with partner	2.89	medium	2	135	108.9	174.2	yes	No	2.6	2.4	0.5	172	186.333	0.541667	1.08333	0.625144	Never	2400	active	No	No	1556.88	0.603294	0
99315	Male	22	Non-Hispanic Non-Hispanic White	College diploma	Living alone	2.03	medium	2	140	78.6	177.5	yes	No	3.2	1.1	0.4	306	890.182	1.16364	2.90909	0.442817	Never	4960	active	No	Yes	6582.23	0.13035	0
99316	Male	47	Mexican American	College diploma	Married/living with partner	1.92	medium	2	136	96.7	171.5	yes	No	3.7	1.5	0.6	266	656.133	1.48	2.46667	0.563848	Never	24000	active	No	No	10981.7	0.385145	0
99321	Male	45	Other Race	College diploma	Married/living with partner	5	high	1	134	90.4	174.4	yes	No	4	2	0.6	191	382	1.2	2	0.518349	Former	1460	active	Yes	No	1903.69	0.222723	1
99322	Female	35	Non-Hispanic Non-Hispanic White	College diploma	Living alone	3.73	high	1	139	98.6	155.1	yes	No	4	2.3	0.5	182	316.522	0.869565	1.73913	0.635719	Never	0	inactive	No	No	6834.64	0.885392	0
99327	Male	59	Non-Hispanic Non-Hispanic White	High school diploma	Living alone	0.99	low	2	145	128.6	176.8	yes	No	2.7	1.9	0.6	400	568.421	0.852632	1.42105	0.727376	Former	0	inactive	Yes	Yes	3190.2	1.08307	0
99332	Female	63	Mexican American	College diploma	Married/living with partner	2.2	medium	1	146	114.1	153.7	no	No	4.3	2	0.4	213	457.95	0.86	2.15	0.742355	Never	2160	active	Yes	Yes	2955.77	1.4099	0
99335	Male	46	Other Race	College diploma	Married/living with partner	2.55	medium	2	141	85.5	174.4	yes	No	2.7	1.3	0.8	244	506.769	1.66154	2.07692	0.490252	Current	19200	active	Yes	No	4469.27	0.302204	0
99338	Female	37	Mexican American	<High school diploma	Married/living with partner	1.29	low	2	144	90.2	162.6	yes	No	4.1	1.6	0.6	309	791.812	1.5375	2.5625	0.554736	Current	3600	active	No	No	8954.74	0.896822	0
99339	Female	21	Mexican American	High school diploma	Married/living with partner	2.72	medium	2	136	108.6	159.4	yes	No	6	2.5	0.4	204	489.6	0.96	2.4	0.681305	Never	14640	active	No	No	10132.5	1.76506	0
99345	Male	52	Mexican American	<High school diploma	Married/living with partner	1.04	low	2	144	99.1	167.2	yes	No	3.7	2	0.5	207	382.95	0.925	1.85	0.592703	Never	0	inactive	No	Yes	2868.98	0.981125	0
99346	Male	26	Other Race	College diploma	Living alone	5	high	2	137	84	171.4	yes	No	4.5	2.8	0.5	195	313.393	0.803571	1.60714	0.490082	Never	720	active	No	No	4663.42	0.206283	0
99351	Male	80	Non-Hispanic White	College diploma	Married/living with partner	4.27	high	1	139	127.5	171	yes	No	4.6	2.7	0.8	179	304.963	1.36296	1.7037	0.745614	Former	2880	active	Yes	Yes	5347.32	1.00863	1
99353	Female	30	Non-Hispanic Non-Hispanic White	College diploma	Married/living with partner	2.49	medium	1	144	146	168.5	no	No	4.5	2.6	0.5	249	430.962	0.865385	1.73077	0.866469	Never	9600	active	No	No	5865.03	0.426247	0
99359	Female	37	Other Race	College diploma	Married/living with partner	4.58	high	2	138	102.4	155.5	yes	No	3.6	2.7	0.7	255	340	0.933333	1.33333	0.658521	Never	1440	active	No	No	3577.08	1.00761	1
99364	Male	52	Other Race	<High school diploma	Married/living with partner	0.58	low	2	137	88	161.7	yes	No	4.9	1.5	0.6	207	676.2	1.96	3.26667	0.544218	Current	0	inactive	No	No	3379.6	0.524943	0
99366	Female	47	Mexican American	College diploma	Married/living with partner	5	high	2	143	123.8	153.2	yes	No	5.4	2.6	0.5	301	625.154	1.03846	2.07692	0.808094	Current	0	inactive	Yes	No	7740.76	0.868049	0
99372	Female	67	Non-Hispanic White	College diploma	Living alone	5	high	2	147	79.8	174.9	yes	No	3.2	1.2	0.5	270	720	1.33333	2.66667	0.456261	Never	920	active	No	No	41950	0.61461	0
99376	Male	53	Other Race	College diploma	Living alone	5	high	1	147	117.7	172.5	yes	No	4.8	3.4	0.9	336	474.353	1.27059	1.41176	0.682319	Current	0	inactive	Yes	Yes	3409.52	1.78603	0
99377	Female	80	Other Hispanic	<High school diploma	Living alone	4.08	high	2	134	86.8	147.6	yes	No	4.6	4.2	1.1	325	355.952	1.20476	1.09524	0.588076	Never	0	inactive	Yes	No	4542.12	0.71025	1
99385	Female	68	Non-Hispanic White	College diploma	Married/living with partner	4.62	high	1	135	87	164.9	yes	No	2	1.5	0.4	249	332	0.533333	1.33333	0.527592	Never	6000	active	No	No	31523.7	0.192032	0
99396	Female	22	Mexican American	College diploma	Living alone	1.52	medium	2	144	95.7	159.7	yes	No	3.7	2.8	0.6	216	285.429	0.792857	1.32143	0.599249	Never	240	inactive	No	No	5292.29	0.676627	0
99401	Female	22	Other Race	College diploma	Living alone	3.4	medium	2	135	73.6	176.9	yes	No	2.8	2	0.3	234	327.6	0.42	1.4	0.416054	Never	2320	active	No	No	3481.8	0.103566	0
99405	Male	54	Other Race	High school diploma	Married/living with partner	0.93	low	2	142	132.4	163.7	yes	No	3.5	2.3	0.8	274	416.957	1.21739	1.52174	0.808797	Former	0	inactive	No	Yes	8718.77	0.621937	1
99415	Female	73	Non-Hispanic Non-Hispanic White	College diploma	Married/living with partner	5	high	1	136	102.9	157.6	yes	No	3.3	1.7	0.7	265	514.412	1.35882	1.94118	0.652919	Never	480	inactive	Yes	Yes	5972	0.649834	0
99418	Female	61	Non-Hispanic Non-Hispanic White	High school diploma	Married/living with partner	2.03	medium	2	140	84.3	156.5	yes	No	2.4	2.3	0.5	395	412.174	0.521739	1.04348	0.538658	Never	180	inactive	Yes	No	4619.11	0.251179	1
99427	Female	45	Non-Hispanic White	College diploma	Married/living with partner	2.64	medium	1	145	134	162.8	yes	No	5.7	3.7	0.6	314	483.73	0.924324	1.54054	0.823096	Never	120	inactive	No	Yes	4158.78	0.823096	1
99430	Male	36	Mexican American	High school diploma	Married/living with partner	2.86	medium	2	142	115.7	175.9	yes	No	3.3	2.1	0.5	142	223.143	0.785714	1.57143	0.65776	Current	23040	active	No	No	13172.1	0.59541	0
99436	Female	22	Non-Hispanic Non-Hispanic White	College diploma	Married/living with partner	1.58	medium	2	147	114.2	173.5	yes	No	3	2.7	0.6	288	320	0.666667	1.11111	0.658213	Former	0	inactive	No	No	3756.1	0.399453	0
99438	Female	41	Other Race	High school diploma	Married/living with partner	0.89	low	1	144	90.1	153.8	no	No	3.8	2.1	0.4	153	276.857	0.72381	1.80952	0.585826	Never	960	active	Yes	No	3149.03	1.14075	0
99442	Female	35	Non-Hispanic White	College diploma	Married/living with partner	1.22	low	2	139	76.2	159.1	yes	No	4.4	2.4	0.6	274	502.333	1.1	1.83333	0.478944	Current	0	inactive	No	No	3984.39	0.481829	0
99443	Male	57	Non-Hispanic White	College diploma	Married/living with partner	2.79	medium	2	135	142.4	176.1	yes	No	5.4	2.5	0.9	292	630.72	1.944	2.16	0.808631	Never	1360	active	No	Yes	20814.1	0.897163	0
99444	Male	52	Other Race	College diploma	Living alone	3.18	medium	1	137	117.1	166.6	yes	No	4.2	3.1	0.5	404	547.355	0.677419	1.35484	0.702881	Former	5400	active	Yes	Yes	3664.83	1.08089	0
99446	Female	29	Non-Hispanic White	College diploma	Married/living with partner	2.85	medium	1	135	86.9	167.4	yes	No	3.8	2.3	0.4	231	381.652	0.66087	1.65217	0.519116	Never	2400	active	No	No	10866.7	0.0679529	0
99448	Male	49	Other Race	<High school diploma	Married/living with partner	0.61	low	2	139	85.2	173.8	yes	No	5.8	1.9	0.5	230	702.105	1.52632	3.05263	0.490219	Current	3480	active	No	No	4083.46	1.10699	0
99449	Male	41	Non-Hispanic Non-Hispanic White	College diploma	Married/living with partner	4.74	high	2	147	108.4	179.4	yes	No	4.5	2.8	0.6	333	535.179	0.964286	1.60714	0.604236	Never	0	inactive	Yes	No	3088.3	0.861183	0
99452	Female	63	Non-Hispanic White	High school diploma	Living alone	1.67	medium	1	140	75.9	162.2	yes	No	5.3	1.8	1.2	306	901	3.53333	2.94444	0.467941	Current	540	inactive	Yes	No	7041.89	0.300531	1
99453	Female	29	Other Hispanic	<High school diploma	Married/living with partner	0.25	low	2	140	82.7	159.7	no	No	4.4	2.3	0.6	262	501.217	1.14783	1.91304	0.517846	Never	400	inactive	Yes	No	3223.42	0.689431	0
99456	Male	26	Other Race	College diploma	Married/living with partner	1.58	medium	2	144	88.7	172.5	yes	No	3.5	4.1	0.8	304	259.512	0.682927	0.853659	0.514203	Never	3360	active	No	No	2058.65	0.926862	0
99461	Male	61	Mexican American	<High school diploma	Married/living with partner	5	high	2	136	90.3	172.9	yes	No	1.8	1.8	0.3	349	349	0.3	1	0.522267	Never	15040	active	No	No	1661.84	0.131511	0
99463	Female	23	Other Hispanic	College diploma	Married/living with partner	0.91	low	2	137	93.6	159.1	yes	No	3.7	1.9	0.3	293	570.579	0.584211	1.94737	0.588309	Never	0	inactive	No	No	8984.43	0.13881	0
99466	Female	29	Other Hispanic	<High school diploma	Married/living with partner	1.37	medium	1	147	113.9	146.4	yes	No	4.6	2.2	0.5	288	602.182	1.04545	2.09091	0.778005	Never	0	inactive	No	No	3765.29	0.714692	0
99469	Male	59	Non-Hispanic White	College diploma	Married/living with partner	5	high	2	140	113.9	173.9	yes	No	3.4	2	0.6	203	345.1	1.02	1.7	0.654974	Never	1120	active	No	No	39403.2	0.599075	0
99473	Male	41	Non-Hispanic White	High school diploma	Married/living with partner	2.89	medium	2	143	79.7	179.4	yes	No	4.7	2.5	0.6	225	423	1.128	1.88	0.444259	Never	31200	active	No	No	35681.2	0.250689	0
99479	Female	58	Mexican American	<High school diploma	Married/living with partner	3.32	medium	2	148	129	146.2	no	No	6	4.7	0.7	262	334.468	0.893617	1.2766	0.882353	Never	1920	active	Yes	Yes	2126.73	0.937222	0
99484	Female	51	Other Hispanic	<High school diploma	Living alone	0.07	low	2	140	138.6	161.8	yes	No	5	2.3	0.7	291	632.609	1.52174	2.17391	0.856613	Current	15120	active	Yes	No	2281.57	0.816591	1
99486	Male	62	Other Race	College diploma	Married/living with partner	4.25	high	2	134	88.1	166	yes	No	4	1.7	0.5	175	411.765	1.17647	2.35294	0.530723	Former	11280	active	Yes	Yes	1837.05	0.476397	0
99488	Male	57	Mexican American	High school diploma	Living alone	2.88	medium	2	143	89.8	168.4	yes	No	4.4	1.7	0.6	346	895.529	1.55294	2.58824	0.533254	Never	11040	active	No	No	6298.71	0.256306	0
99497	Female	56	Other Race	High school diploma	Married/living with partner	3.4	medium	2	135	100.8	170.9	yes	No	3.2	2.7	0.3	238	282.074	0.355556	1.18519	0.589819	Never	4200	active	Yes	No	4641.99	2.13714	0
99518	Male	80	Non-Hispanic Non-Hispanic White	College diploma	Married/living with partner	5	high	1	136	116.8	176.9	yes	No	3.1	1.7	0.6	250	455.882	1.09412	1.82353	0.66026	Former	1080	active	Yes	Yes	2834.9	0.424984	0
99526	Female	29	Other Race	College diploma	Living alone	5	high	1	141	120	153.2	yes	No	5.5	3.3	0.4	305	508.333	0.666667	1.66667	0.78329	Never	1520	active	No	No	3967.67	0.875659	0
99531	Female	55	Mexican American	College diploma	Living alone	1.11	low	1	135	101.6	162.1	no	No	3.6	2.6	0.3	267	369.692	0.415385	1.38462	0.626774	Never	1200	active	Yes	No	3036.35	1.02119	1
99533	Female	73	Non-Hispanic White	College diploma	Married/living with partner	5	high	2	140	87.6	156.7	yes	No	3.5	1.1	0.4	237	754.091	1.27273	3.18182	0.55903	Former	3720	active	Yes	No	12878.5	0.241424	1
99535	Male	72	Mexican American	<High school diploma	Living alone	3.29	medium	2	148	107.2	169.7	yes	No	4.8	2.3	0.6	211	440.348	1.25217	2.08696	0.631703	Former	10320	active	Yes	Yes	2527.07	3.20063	0
99538	Male	66	Non-Hispanic White	High school diploma	Married/living with partner	5	high	1	142	107.5	181.2	yes	No	2.6	1.9	0.6	184	251.789	0.821053	1.36842	0.593267	Never	3360	active	No	No	30407.3	1.22656	0
99539	Male	22	Non-Hispanic Non-Hispanic White	High school diploma	Married/living with partner	1.15	low	2	142	131.7	191	yes	No	5.2	2.1	0.6	209	517.524	1.48571	2.47619	0.689529	Current	16800	active	Yes	No	6520.93	1.65098	0
99541	Male	43	Non-Hispanic Non-Hispanic White	High school diploma	Living alone	3.32	medium	1	141	116.8	179.8	yes	No	2.8	2	0.5	260	364	0.7	1.4	0.649611	Never	240	inactive	No	No	6341.95	0.546844	0
99543	Male	69	Other Race	College diploma	Married/living with partner	5	high	1	134	96.3	173.4	no	No	2.7	2.2	0.5	226	277.364	0.613636	1.22727	0.555363	Never	1440	active	No	No	1437.62	0.586714	0
99564	Female	76	Other Hispanic	College diploma	Living alone	5	high	2	142	88.2	158.8	yes	No	4.6	1.7	0.6	258	698.118	1.62353	2.70588	0.555416	Never	4800	active	Yes	No	6443.71	0.2449	0
99573	Male	25	Non-Hispanic Non-Hispanic White	High school diploma	Living alone	2.76	medium	2	147	77.8	174.6	yes	No	2.5	2.7	0.6	203	187.963	0.555556	0.925926	0.44559	Never	37200	active	No	No	5607.72	0.200661	0
99580	Male	66	Non-Hispanic White	<High school diploma	Married/living with partner	2.03	medium	2	146	103.7	167.3	yes	No	2.4	1	0.4	260	624	0.96	2.4	0.619845	Former	0	inactive	Yes	No	18558.3	0.56659	0
99584	Male	21	Mexican American	High school diploma	Married/living with partner	1.19	low	2	136	96.7	168.9	yes	No	3.6	1.8	0.6	281	562	1.2	2	0.572528	Never	0	inactive	No	No	15406.7	0.339293	0
99593	Male	34	Other Race	College diploma	Married/living with partner	5	high	2	144	79	178.4	yes	No	2.6	1.7	0.4	81	123.882	0.611765	1.52941	0.442825	Former	1200	active	No	No	3713.44	0.428064	0
99599	Female	48	Non-Hispanic White	College diploma	Married/living with partner	5	high	1	142	93.6	180.4	yes	No	2.6	2.5	0.8	257	267.28	0.832	1.04	0.518847	Never	720	active	No	No	42443.4	0.31859	0
99600	Female	55	Non-Hispanic Non-Hispanic White	High school diploma	Married/living with partner	0.08	low	2	148	94.5	153	yes	No	2.8	1.5	0.3	426	795.2	0.56	1.86667	0.617647	Never	6960	active	No	No	5083.33	0.378856	0
99605	Male	46	Non-Hispanic White	College diploma	Married/living with partner	5	high	2	141	137.2	179.1	yes	No	4.3	3.1	0.6	318	441.097	0.832258	1.3871	0.766052	Never	8280	active	No	Yes	16689.9	0.420275	0
99613	Male	38	Non-Hispanic Non-Hispanic White	College diploma	Married/living with partner	5	high	2	140	90.2	179.4	yes	No	2.3	1.5	0.4	176	269.867	0.613333	1.53333	0.502787	Never	1920	active	No	No	9114.9	0.160294	0
99615	Female	63	Non-Hispanic White	College diploma	Living alone	0.4	low	2	137	128	160.6	yes	No	7.4	3.1	0.6	373	890.387	1.43226	2.3871	0.797011	Current	0	inactive	Yes	Yes	5522.41	0.709165	1
99616	Female	39	Non-Hispanic White	College diploma	Married/living with partner	2.01	medium	2	142	162.3	168	yes	No	7.9	2	0.6	350	1382.5	2.37	3.95	0.966071	Never	720	active	Yes	Yes	21964.1	0.54025	0
99622	Female	61	Non-Hispanic White	College diploma	Married/living with partner	5	high	2	145	120.2	165.3	yes	No	4.9	2.1	0.5	310	723.333	1.16667	2.33333	0.727163	Never	300	inactive	No	No	45346.1	0.955622	0
99636	Female	53	Mexican American	High school diploma	Married/living with partner	2.39	medium	2	144	134.2	157.1	yes	No	6.1	2.5	0.5	350	854	1.22	2.44	0.854233	Never	0	inactive	Yes	No	3232.72	1.00114	0
99641	Male	23	Non-Hispanic Non-Hispanic White	College diploma	Living alone	2.36	medium	2	143	85	187.2	yes	No	1	1.5	0.2	230	153.333	0.133333	0.666667	0.45406	Never	12240	active	Yes	No	3270.62	0.206699	1
99645	Female	80	Non-Hispanic Non-Hispanic White	<High school diploma	Married/living with partner	0.65	low	1	139	100.7	151.4	yes	No	6.7	1.6	0.6	363	1520.06	2.5125	4.1875	0.665125	Former	0	inactive	Yes	No	2745.04	0.316726	0
99655	Male	38	Non-Hispanic Non-Hispanic White	College diploma	Living alone	0.17	low	1	147	93.9	172.2	yes	No	4.2	1.4	0.5	267	801	1.5	3	0.545296	Never	1200	active	Yes	No	7083.78	0.16281	0
99659	Female	41	Other Race	High school diploma	Married/living with partner	1.49	medium	1	143	85.9	158	yes	No	6.3	1.5	0.4	271	1138.2	1.68	4.2	0.543671	Never	720	active	No	No	3374.48	0.287958	0
99662	Female	65	Non-Hispanic Non-Hispanic White	High school diploma	Married/living with partner	2.43	medium	2	146	120.6	164.9	yes	No	4.6	1.5	0.5	197	604.133	1.53333	3.06667	0.731352	Never	0	inactive	Yes	Yes	2564.92	2.05676	0
99679	Male	61	Other Hispanic	College diploma	Married/living with partner	5	high	1	143	102.5	172.9	yes	No	2.8	1.5	0.7	218	406.933	1.30667	1.86667	0.592828	Former	12240	active	Yes	Yes	2969.67	0.225392	0
99682	Male	80	Non-Hispanic White	College diploma	Married/living with partner	5	high	2	147	108.5	178.3	yes	No	3.5	1.5	0.5	182	424.667	1.16667	2.33333	0.608525	Never	0	inactive	Yes	Yes	11846.4	0.308729	0
99683	Female	80	Non-Hispanic White	<High school diploma	Married/living with partner	1.6	medium	1	140	100.2	147	yes	No	6.4	0.8	0.7	232	1856	5.6	8	0.681633	Former	2880	active	Yes	Yes	4842.24	0.786614	1
99686	Male	40	Non-Hispanic Non-Hispanic White	High school diploma	Married/living with partner	1.96	medium	1	138	89.5	188.6	yes	No	3.4	1.6	0.5	202	429.25	1.0625	2.125	0.474549	Never	19240	active	No	Yes	6030.43	0.324275	0
99698	Female	74	Non-Hispanic Non-Hispanic White	<High school diploma	Married/living with partner	4.8	high	1	136	115.2	163.5	yes	No	6.7	3.1	0.9	285	615.968	1.94516	2.16129	0.704587	Never	320	inactive	Yes	Yes	3042.45	0.708732	0
99700	Male	70	Non-Hispanic White	College diploma	Married/living with partner	4.56	high	2	139	92	159.3	yes	No	2.6	1.3	0.5	204	408	1	2	0.577527	Former	2520	active	No	No	1337.68	1.01916	0
99710	Female	30	Other Race	College diploma	Living alone	1.43	medium	2	140	76.9	163.3	yes	No	3.3	2.1	0.5	217	341	0.785714	1.57143	0.470912	Never	11040	active	No	No	820.101	0.151407	0
99715	Female	24	Non-Hispanic Non-Hispanic White	High school diploma	Living alone	1.06	low	1	147	114	160.5	yes	No	2.3	1.3	0.3	215	380.385	0.530769	1.76923	0.71028	Never	2160	active	No	No	5018.79	0.547716	0
99716	Male	35	Mexican American	<High school diploma	Married/living with partner	2.19	medium	2	135	95.6	162.8	yes	No	3.6	1.6	0.4	161	362.25	0.9	2.25	0.587224	Never	29280	active	No	No	1231.98	1.58202	0
99720	Male	53	Other Race	College diploma	Married/living with partner	5	high	2	138	97.1	176.7	yes	No	4.4	1.7	0.6	224	579.765	1.55294	2.58824	0.549519	Never	1360	active	Yes	Yes	2265.99	1.67603	0
99721	Female	20	Non-Hispanic Non-Hispanic White	College diploma	Living alone	1.46	medium	2	146	87.5	174	yes	No	2	2	0.3	246	246	0.3	1	0.502874	Never	1920	active	No	No	6095.54	0.140805	0
99724	Male	56	Non-Hispanic White	College diploma	Living alone	1.33	medium	1	138	99.8	175.5	yes	No	3.3	3.1	0.6	185	196.935	0.63871	1.06452	0.568661	Former	2040	active	Yes	No	7166.05	0.337461	0
99741	Male	80	Non-Hispanic White	High school diploma	Married/living with partner	2.75	medium	1	138	102.6	171	yes	No	4.4	2.1	0.6	205	429.524	1.25714	2.09524	0.6	Never	2640	active	Yes	No	2390.78	0.548793	0
99744	Female	51	Non-Hispanic White	High school diploma	Living alone	2.79	medium	1	145	87	172.3	yes	No	3.6	2.2	0.5	235	384.545	0.818182	1.63636	0.504933	Current	0	inactive	Yes	No	14120.9	0.267916	0
99745	Male	33	Other Race	College diploma	Married/living with partner	5	high	1	148	96.3	164.7	yes	No	4.2	2.7	0.6	248	385.778	0.933333	1.55556	0.584699	Current	4500	active	Yes	No	3835.34	2.19207	0
99749	Female	33	Non-Hispanic Non-Hispanic White	High school diploma	Married/living with partner	1.04	low	2	145	130.8	176.6	yes	No	6.4	2.8	0.6	331	756.571	1.37143	2.28571	0.740657	Former	2880	active	No	No	5253.97	0.211125	0
99759	Male	50	Mexican American	<High school diploma	Married/living with partner	2.79	medium	2	136	117.9	166.1	yes	No	2.6	2.6	0.4	157	157	0.4	1	0.709813	Never	3840	active	No	Yes	2321.96	0.901315	0
99763	Female	54	Mexican American	College diploma	Living alone	1.7	medium	2	141	86.7	154.6	yes	No	2.9	1.8	0.5	234	377	0.805556	1.61111	0.560802	Former	0	inactive	No	Yes	3363.14	0.824683	0
99765	Female	46	Mexican American	High school diploma	Living alone	1.31	medium	2	148	86.8	160	yes	No	3.4	2.4	0.5	249	352.75	0.708333	1.41667	0.5425	Never	0	inactive	Yes	No	4723.79	0.213223	0
99766	Male	49	Other Race	College diploma	Married/living with partner	5	high	2	144	95.3	167.7	yes	No	3.2	1.8	0.3	215	382.222	0.533333	1.77778	0.568277	Never	1800	active	No	Yes	3012.14	1.20828	0
99772	Female	43	Non-Hispanic Non-Hispanic White	High school diploma	Married/living with partner	2.92	medium	2	147	137.6	161	yes	No	4.9	1.4	0.5	457	1599.5	1.75	3.5	0.854658	Never	0	inactive	No	No	3605.03	0.410013	0
99777	Male	21	Non-Hispanic White	High school diploma	Living alone	2.79	medium	1	145	104.6	190.1	yes	No	2.4	2.2	0.5	240	261.818	0.545455	1.09091	0.550237	Never	19440	active	Yes	No	19303.6	0.440189	0
99782	Female	53	Mexican American	College diploma	Living alone	4.28	high	2	147	97.6	163.2	yes	No	3.1	1.2	0.3	205	529.583	0.775	2.58333	0.598039	Current	9600	active	No	No	4871.08	0.436528	0
99783	Male	35	Mexican American	College diploma	Living alone	2.89	medium	2	136	104.9	165	yes	No	3.9	2.2	0.4	154	273	0.709091	1.77273	0.635758	Former	4000	active	No	Yes	12626.6	9.25409	0
99785	Female	80	Non-Hispanic White	High school diploma	Married/living with partner	5	high	2	147	110.9	153.7	yes	No	5	1.9	0.6	296	778.947	1.57895	2.63158	0.721535	Former	3360	active	Yes	No	16028.5	0.997087	1
99790	Male	24	Other Race	College diploma	Living alone	3.04	medium	2	135	83	178.2	yes	No	4.2	2.1	0.7	189	378	1.4	2	0.465769	Never	3840	active	No	No	4739.49	0.356979	0
99792	Male	69	Other Race	<High school diploma	Married/living with partner	2.06	medium	2	139	98.8	168.1	yes	No	4.5	1.8	0.8	118	295	2	2.5	0.587745	Former	2400	active	No	No	2900.45	0.457529	0
99807	Male	27	Mexican American	College diploma	Living alone	1.98	medium	2	140	93.4	168.2	yes	No	4.2	2.2	0.6	250	477.273	1.14545	1.90909	0.555291	Current	4800	active	No	No	9820.62	1.11975	0
99819	Male	50	Non-Hispanic White	High school diploma	Living alone	2.47	medium	2	134	97.4	175.7	yes	No	2.7	2.1	0.5	326	419.143	0.642857	1.28571	0.554354	Never	4800	active	No	No	49087.1	0.443483	0
99840	Female	74	Other Hispanic	High school diploma	Married/living with partner	5	high	1	137	91.1	159	yes	No	2.5	2.1	0.4	262	311.905	0.47619	1.19048	0.572956	Never	0	inactive	Yes	Yes	4163.07	0.637618	0
99842	Male	47	Non-Hispanic White	College diploma	Married/living with partner	4.57	high	2	146	106.4	177.6	yes	No	5.5	2.1	1	270	707.143	2.61905	2.61905	0.599099	Former	1440	active	Yes	No	25024.5	0.736714	0
99855	Male	34	Non-Hispanic Non-Hispanic White	College diploma	Married/living with partner	0.8	low	1	139	130.1	167.3	yes	No	3.1	2.3	0.6	184	248	0.808696	1.34783	0.777645	Never	4800	active	Yes	No	3273.38	0.701135	0
99857	Female	36	Mexican American	High school diploma	Living alone	3.32	medium	2	148	105.5	153.3	yes	No	6.8	4.7	0.7	268	387.745	1.01277	1.44681	0.688193	Never	2880	active	No	Yes	7717.54	2.28368	0
99858	Male	58	Non-Hispanic White	College diploma	Married/living with partner	3.08	medium	1	142	141.7	182.4	yes	No	2.9	1.9	0.5	195	297.632	0.763158	1.52632	0.776864	Never	12480	active	No	No	15652.9	1.09331	1
99864	Female	36	Non-Hispanic White	College diploma	Married/living with partner	1.51	medium	2	142	136	168.3	yes	No	2.4	1.9	0.4	246	310.737	0.505263	1.26316	0.808081	Never	0	inactive	No	No	8094.28	0.473413	0
99866	Male	61	Non-Hispanic White	College diploma	Living alone	2.24	medium	1	136	153.2	179.2	yes	No	6.5	1.5	0.9	273	1183	3.9	4.33333	0.854911	Former	0	inactive	Yes	No	3863.28	1.06234	1
99867	Male	29	Non-Hispanic White	College diploma	Living alone	3.73	high	2	146	87.2	166.9	yes	No	5.1	3	0.9	313	532.1	1.53	1.7	0.522469	Former	7200	active	No	No	18357.5	0.488881	0
99868	Female	70	Non-Hispanic White	College diploma	Living alone	5	high	2	145	116.8	153.3	yes	No	2.9	0.9	0.5	164	528.444	1.61111	3.22222	0.761905	Never	2040	active	Yes	No	28346.2	0.0585859	0
99881	Female	55	Other Race	High school diploma	Married/living with partner	4.86	high	2	140	75.3	165.8	yes	No	2.6	1.3	0.3	246	492	0.6	2	0.454162	Never	9120	active	No	No	3851.61	0.0799381	0
99883	Male	51	Other Hispanic	<High school diploma	Married/living with partner	2.54	medium	1	135	103.7	169.4	yes	No	4.7	2	0.6	121	284.35	1.41	2.35	0.612161	Former	7920	active	No	No	8673.54	1.52327	0
99886	Female	63	Non-Hispanic White	High school diploma	Living alone	0.62	low	1	140	92.8	164.1	yes	No	5.3	3	0.7	244	431.067	1.23667	1.76667	0.565509	Current	240	inactive	Yes	No	7141.07	0.754975	0
99887	Female	27	Non-Hispanic White	College diploma	Married/living with partner	5	high	2	142	90.4	170.7	yes	No	3	2.2	0.7	291	396.818	0.954545	1.36364	0.529584	Never	5760	active	No	No	8463.14	0.203516	0
99895	Male	73	Other Hispanic	High school diploma	Living alone	2.21	medium	2	134	129	162.8	yes	No	4.5	1.4	0.4	236	758.571	1.28571	3.21429	0.792383	Current	400	inactive	No	No	7376.28	0.96305	0
99898	Male	33	Non-Hispanic White	High school diploma	Married/living with partner	4.31	high	1	137	133	187.2	yes	No	6.3	2.1	0.7	265	795	2.1	3	0.71047	Former	2520	active	Yes	No	30255.2	0.614786	0
99901	Female	36	Non-Hispanic Non-Hispanic White	College diploma	Living alone	2.2	medium	1	136	112.7	159.2	yes	No	2.2	1.8	0.3	193	235.889	0.366667	1.22222	0.707915	Never	0	inactive	No	No	3141.86	0.28167	0
99907	Female	66	Non-Hispanic White	High school diploma	Living alone	3.29	medium	2	146	85.4	149.5	yes	No	3.7	2.6	0.7	336	478.154	0.996154	1.42308	0.571237	Never	1440	active	Yes	No	23276.8	0.482637	1
99908	Female	63	Mexican American	<High school diploma	Married/living with partner	1.35	medium	1	148	105.5	159.1	yes	No	3.6	2	0.5	327	588.6	0.9	1.8	0.663105	Never	0	inactive	No	No	1989.3	0.357123	1
99909	Male	42	Other Hispanic	High school diploma	Married/living with partner	0.34	low	2	144	96.2	175.3	yes	No	4.8	1.4	0.4	304	1042.29	1.37143	3.42857	0.548774	Never	12960	active	No	No	2866	0.374848	0
99919	Male	80	Non-Hispanic Non-Hispanic White	<High school diploma	Living alone	1	low	1	136	84.8	176.8	yes	No	3.5	2.5	0.5	213	298.2	0.7	1.4	0.479638	Never	3360	active	No	Yes	1631.8	0.975897	0
99920	Female	36	Non-Hispanic White	College diploma	Married/living with partner	0.33	low	1	140	102.9	172.7	yes	No	4.4	2.2	0.6	233	466	1.2	2	0.595831	Current	0	inactive	No	No	8964.27	0.504513	0
99924	Female	21	Other Race	College diploma	Living alone	5	high	2	138	67.3	157	yes	No	1.5	1.4	0.3	188	201.429	0.321429	1.07143	0.428662	Never	8280	active	No	No	4631.79	0.0769644	0
99927	Male	25	Mexican American	High school diploma	Living alone	0.4	low	2	137	127.3	152.1	yes	No	4.2	2.4	0.7	256	448	1.225	1.75	0.836949	Never	22380	active	No	No	7365.75	1.81839	0
99928	Male	29	Mexican American	<High school diploma	Living alone	2.89	medium	2	136	131.4	168.7	yes	No	5.7	1.7	0.7	253	848.294	2.34706	3.35294	0.778897	Never	0	inactive	No	No	6773.57	1.63312	0
99930	Female	63	Other Race	College diploma	Married/living with partner	5	high	1	134	81	158.5	yes	No	2.6	2.4	0.5	275	297.917	0.541667	1.08333	0.511041	Never	0	inactive	Yes	Yes	2104.41	0.641445	0
99935	Female	42	Mexican American	<High school diploma	Married/living with partner	3.88	high	2	136	93.9	170.2	yes	No	3.6	2	0.3	164	295.2	0.54	1.8	0.551704	Never	14720	active	No	No	4187.39	0.198681	0
99937	Female	54	Other Hispanic	College diploma	Married/living with partner	5	high	1	136	93.1	152.3	yes	No	3	2.1	0.5	257	367.143	0.714286	1.42857	0.611293	Never	2720	active	No	Yes	5274.33	0.810385	0
99942	Female	35	Mexican American	College diploma	Living alone	1.7	medium	2	141	92.6	158.2	yes	No	7	2.3	0.8	337	1025.65	2.43478	3.04348	0.585335	Never	0	inactive	No	No	5386.79	0.575422	0
99950	Male	80	Non-Hispanic Non-Hispanic White	College diploma	Living alone	0.66	low	2	147	106.3	179.6	yes	No	1.8	2.1	0.5	168	144	0.428571	0.857143	0.591871	Former	900	active	Yes	No	2154.13	0.418128	0
99954	Male	71	Other Race	College diploma	Married/living with partner	5	high	1	145	89.2	159.6	yes	No	2.3	1.4	0.3	151	248.071	0.492857	1.64286	0.558897	Never	4320	active	No	Yes	1878.65	0.288547	0
99959	Male	48	Non-Hispanic Non-Hispanic White	College diploma	Married/living with partner	2.92	medium	2	147	117.7	171.9	yes	No	4.2	3.2	0.7	287	376.688	0.91875	1.3125	0.6847	Never	4800	active	Yes	Yes	2169.53	1.06271	0
99961	Female	39	Other Race	College diploma	Living alone	4.94	high	2	148	87.9	164	yes	No	3.5	1.7	0.3	259	533.235	0.617647	2.05882	0.535976	Former	7680	active	Yes	No	3170.52	0.193435	0
99984	Female	54	Other Hispanic	College diploma	Married/living with partner	5	high	2	135	104.7	164.9	yes	No	7.7	1.6	0.5	234	1126.12	2.40625	4.8125	0.63493	Current	2640	active	Yes	No	4118.14	1.12961	0
99985	Female	37	Non-Hispanic White	College diploma	Married/living with partner	2.99	medium	2	147	88.5	165.5	yes	No	2.1	1.4	0.3	174	261	0.45	1.5	0.534743	Never	2160	active	No	No	24474.6	0.134652	0
99989	Female	21	Mexican American	College diploma	Living alone	1.35	medium	2	136	98.5	166.1	yes	No	4.3	2.9	0.6	286	424.069	0.889655	1.48276	0.593016	Never	3960	active	No	No	5934.19	0.401557	0
100015	Male	27	Non-Hispanic White	High school diploma	Living alone	1.32	medium	2	146	87	171.8	yes	No	3.1	2.1	0.6	193	284.905	0.885714	1.47619	0.506403	Current	38880	active	No	No	15342.9	0.334417	0
100025	Female	35	Non-Hispanic White	College diploma	Married/living with partner	1.11	low	1	141	144.6	167.4	yes	No	5.2	2	0.7	310	806	1.82	2.6	0.863799	Current	0	inactive	No	Yes	7807.99	0.975585	1
100026	Female	22	Other Race	College diploma	Living alone	2.55	medium	2	137	94	161	yes	No	6.9	3.4	0.8	297	602.735	1.62353	2.02941	0.583851	Never	240	inactive	Yes	No	3453.36	3.06557	0
100029	Female	20	Mexican American	High school diploma	Living alone	1.7	medium	2	136	76.1	154.8	yes	No	6.8	2.2	0.6	202	624.364	1.85455	3.09091	0.491602	Never	3840	active	No	No	7481.39	0.236286	0
100032	Female	27	Other Race	College diploma	Living alone	5	high	2	141	70.6	152.5	yes	No	2.1	2.2	0.6	248	236.727	0.572727	0.954545	0.462951	Never	1680	active	No	No	4764.84	0.146736	0
100040	Male	24	Other Race	High school diploma	Married/living with partner	3.35	medium	2	146	108.5	181	yes	No	3.4	1.8	0.4	172	324.889	0.755556	1.88889	0.599448	Former	23040	active	Yes	No	14682.9	0.62352	0
100043	Female	67	Non-Hispanic Non-Hispanic White	College diploma	Living alone	2.16	medium	1	139	120	159.1	yes	No	5.8	1.8	0.5	360	1160	1.61111	3.22222	0.754243	Former	0	inactive	Yes	No	1746.43	0.635575	1
100044	Male	27	Mexican American	<High school diploma	Living alone	2.39	medium	2	144	90.2	176.4	yes	No	4.8	2.4	0.6	222	444	1.2	2	0.511338	Current	33120	active	No	No	3036.65	0.539317	0
100051	Male	66	Non-Hispanic White	High school diploma	Married/living with partner	2.17	medium	1	142	143.6	178.1	yes	No	5.6	1.7	0.7	170	560	2.30588	3.29412	0.806289	Current	0	inactive	Yes	Yes	5267.44	1.07033	0
100071	Male	71	Non-Hispanic White	College diploma	Married/living with partner	1.68	medium	2	146	99.3	169.1	yes	Yes	5.8	2.7	0.7	124	266.37	1.5037	2.14815	0.587226	Former	4320	active	Yes	No	3621.35	0.697078	0
100079	Female	80	Non-Hispanic White	High school diploma	Married/living with partner	5	high	1	146	87	151.5	yes	No	2.9	1.5	0.3	166	320.933	0.58	1.93333	0.574257	Never	0	inactive	Yes	No	13403.8	0.217814	0
100088	Male	75	Mexican American	<High school diploma	Married/living with partner	5	high	1	137	102.1	168.4	yes	No	5.7	1.7	0.5	264	885.176	1.67647	3.35294	0.606295	Former	0	inactive	Yes	Yes	2345.2	0.690947	0
100089	Female	24	Non-Hispanic White	College diploma	Married/living with partner	3.91	high	2	142	72.8	154.5	yes	No	4.5	1.5	0.4	238	714	1.2	3	0.471197	Never	0	inactive	No	No	18023.2	0.0846014	0
100099	Male	45	Non-Hispanic White	College diploma	Married/living with partner	5	high	1	135	105.3	179.1	yes	No	4.1	3.3	0.7	207	257.182	0.869697	1.24242	0.58794	Never	6240	active	Yes	No	20571.1	3.98262	0
100100	Male	32	Non-Hispanic Non-Hispanic White	<High school diploma	Married/living with partner	1.65	medium	2	140	83.3	185.8	yes	No	3.9	2.4	0.5	233	378.625	0.8125	1.625	0.448332	Never	11040	active	No	No	4233.9	0.334986	0
100102	Male	41	Other Race	College diploma	Married/living with partner	4.78	high	2	140	110.7	171.3	yes	No	5.6	2.5	1	324	725.76	2.24	2.24	0.646235	Never	14400	active	No	No	1834.98	1.69749	0
100103	Male	61	Other Hispanic	<High school diploma	Married/living with partner	4.07	high	1	144	114.6	176.2	yes	No	3.7	2.2	0.4	230	386.818	0.672727	1.68182	0.650397	Never	0	inactive	No	Yes	2136.29	2.89817	0
100105	Female	50	Non-Hispanic Non-Hispanic White	College diploma	Married/living with partner	4.62	high	2	142	144.7	156.8	yes	No	5.3	2.5	0.5	326	691.12	1.06	2.12	0.922832	Never	2880	active	Yes	No	3938.18	0.430655	1
100110	Male	26	Non-Hispanic Non-Hispanic White	College diploma	Living alone	2.74	medium	1	144	82.7	176.2	yes	No	1.4	2.5	0.4	262	146.72	0.224	0.56	0.469353	Never	300	inactive	No	No	5065.88	0.166545	0
100111	Male	26	Mexican American	College diploma	Married/living with partner	3.31	medium	2	135	77.3	175.6	yes	No	3.1	1.7	0.6	201	366.529	1.09412	1.82353	0.440205	Never	6240	active	No	No	13865.8	0.508003	0
100112	Female	57	Other Hispanic	College diploma	Married/living with partner	5	high	2	138	73.8	155.7	yes	No	2.7	1.7	0.3	236	374.824	0.476471	1.58824	0.473988	Never	3120	active	No	No	11691.6	0.237924	0
100115	Female	47	Non-Hispanic White	<High school diploma	Living alone	3.33	medium	1	141	94	159.6	yes	No	2.7	1.7	0.6	220	349.412	0.952941	1.58824	0.588972	Never	0	inactive	No	No	21819.3	0.257438	0
100122	Male	65	Non-Hispanic Non-Hispanic White	College diploma	Married/living with partner	2.03	medium	2	140	110.1	182.1	yes	No	6.7	1.2	0.7	178	993.833	3.90833	5.58333	0.604613	Current	14400	active	No	No	2726.16	0.468244	0
100123	Male	57	Non-Hispanic White	<High school diploma	Living alone	1.33	medium	2	146	126.1	166	yes	No	5.6	2.2	0.7	282	717.818	1.78182	2.54545	0.759639	Current	480	inactive	Yes	Yes	4205.54	1.58834	1
100129	Male	72	Mexican American	High school diploma	Married/living with partner	1.7	medium	2	142	107.4	164.4	yes	No	6.3	1.8	0.9	246	861	3.15	3.5	0.653285	Former	0	inactive	No	Yes	2542.24	1.44801	0
100142	Male	72	Non-Hispanic White	College diploma	Married/living with partner	1.78	medium	1	140	99.2	179.6	yes	No	2.7	1.4	0.7	164	316.286	1.35	1.92857	0.552339	Never	6240	active	No	No	8376.23	0.49265	1
100151	Male	60	Mexican American	<High school diploma	Married/living with partner	0.91	low	1	137	121.8	173.3	yes	No	4.6	2.9	0.6	166	263.31	0.951724	1.58621	0.702827	Current	36840	active	Yes	Yes	1149.67	0.862209	0
100154	Male	66	Mexican American	<High school diploma	Married/living with partner	1.49	medium	1	135	106.2	166.8	yes	No	2.9	2.5	0.6	246	285.36	0.696	1.16	0.636691	Former	600	active	Yes	Yes	991.033	0.813085	0
100160	Female	26	Non-Hispanic White	High school diploma	Living alone	1.5	medium	2	142	103.5	150.6	yes	No	6.3	2.5	0.6	479	1207.08	1.512	2.52	0.687251	Never	0	inactive	No	No	12121.7	0.388128	0
100163	Female	69	Non-Hispanic Non-Hispanic White	College diploma	Living alone	4.81	high	1	144	102.3	166.8	yes	No	4.4	2.3	0.5	250	478.261	0.956522	1.91304	0.613309	Never	2880	active	No	No	3796.45	0.660574	0
100175	Male	33	Non-Hispanic Non-Hispanic White	College diploma	Living alone	1.77	medium	1	147	87.6	180.2	no	No	3	2.2	0.5	224	305.455	0.681818	1.36364	0.486127	Never	20640	active	No	No	3513.6	0.168504	0
100181	Female	37	Mexican American	College diploma	Married/living with partner	2.46	medium	2	136	113.9	158.1	yes	No	4.2	2.7	0.4	297	462	0.622222	1.55556	0.72043	Never	600	active	No	No	1646.89	0.37043	0
100190	Female	32	Other Hispanic	College diploma	Married/living with partner	2.73	medium	1	140	112.7	168.7	yes	No	4.5	1.9	0.2	214	506.842	0.473684	2.36842	0.66805	Former	320	inactive	No	No	4857.31	1.97258	0
100192	Male	56	Mexican American	High school diploma	Married/living with partner	1.44	medium	2	137	117.2	164.6	yes	No	4.7	3.7	0.6	254	322.649	0.762162	1.27027	0.712029	Never	12000	active	No	No	5020.74	1.34826	0
100196	Female	32	Non-Hispanic Non-Hispanic White	High school diploma	Living alone	1.48	medium	1	147	80.6	170.2	yes	No	3.4	1.4	0.6	225	546.429	1.45714	2.42857	0.473561	Never	1440	active	No	No	3152.99	0.126355	0
100202	Female	22	Mexican American	College diploma	Living alone	1.2	low	2	136	104.5	156.4	yes	No	4	2.2	0.6	217	394.545	1.09091	1.81818	0.668159	Never	1200	active	No	No	12054.6	0.245528	0
100203	Male	39	Non-Hispanic Non-Hispanic White	High school diploma	Married/living with partner	4.77	high	1	136	74.2	184.6	yes	No	4.5	1.9	0.5	159	376.579	1.18421	2.36842	0.40195	Current	720	active	No	No	7873.91	0.141913	0
100204	Female	36	Other Hispanic	<High school diploma	Married/living with partner	1.02	low	2	138	85.8	173.6	yes	No	2.1	1.7	0.3	231	285.353	0.370588	1.23529	0.49424	Never	3600	active	No	No	2806.65	0.857745	0
100205	Male	48	Non-Hispanic Non-Hispanic White	College diploma	Married/living with partner	2.45	medium	1	147	123.6	178.6	yes	No	6.5	2.9	0.7	230	515.517	1.56897	2.24138	0.692049	Former	0	inactive	No	No	3717.93	0.604564	0
100210	Female	60	Non-Hispanic White	High school diploma	Married/living with partner	0.59	low	2	142	133.5	163.3	yes	No	4.8	2	0.5	294	705.6	1.2	2.4	0.817514	Former	7440	active	Yes	No	16684.5	0.366367	1
100221	Female	30	Non-Hispanic Non-Hispanic White	College diploma	Living alone	2.07	medium	2	147	76.6	173.5	yes	No	1.4	1.2	0.2	256	298.667	0.233333	1.16667	0.441499	Never	2880	active	No	No	2640.59	0.244761	0
100231	Female	69	Mexican American	<High school diploma	Married/living with partner	1.96	medium	2	137	147.4	154.2	yes	No	4	1.7	0.5	189	444.706	1.17647	2.35294	0.955901	Never	0	inactive	Yes	No	2420.05	1.31721	0
100238	Male	58	Non-Hispanic White	High school diploma	Married/living with partner	4.93	high	1	142	110.3	173.5	yes	No	5.6	2	0.6	227	635.6	1.68	2.8	0.635735	Never	1680	active	Yes	No	36581	1.09264	1
100244	Male	62	Non-Hispanic White	College diploma	Living alone	2.8	medium	2	141	122.8	174.8	yes	No	3.5	2.6	0.6	153	205.962	0.807692	1.34615	0.702517	Former	480	inactive	No	No	6618.92	0.723469	0
100247	Female	61	Other Hispanic	College diploma	Married/living with partner	0.91	low	2	142	118.1	159.2	yes	No	2.5	1.6	0.3	196	306.25	0.46875	1.5625	0.741834	Never	2040	active	Yes	No	4670.22	1.83621	0
100248	Male	28	Other Race	College diploma	Married/living with partner	3.69	high	1	143	80.6	168.5	yes	No	2.7	3.2	0.7	221	186.469	0.590625	0.84375	0.478338	Former	3360	active	No	No	2737.99	0.199177	0
100261	Female	80	Non-Hispanic White	High school diploma	Living alone	4.74	high	2	138	106.4	156.3	yes	No	5.6	1.2	0.5	157	732.667	2.33333	4.66667	0.680742	Never	1320	active	Yes	No	10572.9	0.147223	0
100265	Female	55	Other Race	College diploma	Married/living with partner	3.65	high	2	148	77.7	160.2	yes	No	2.4	1.5	0.4	212	339.2	0.64	1.6	0.485019	Never	3600	active	No	No	1843.28	0.287635	0
100268	Female	60	Other Race	College diploma	Married/living with partner	5	high	2	147	82.2	154.4	no	No	2	1.2	0.3	304	506.667	0.5	1.66667	0.532383	Former	24000	active	No	No	3675.85	0.105068	1
100270	Male	36	Other Hispanic	College diploma	Living alone	3.71	high	2	135	101.3	178.3	yes	No	6.9	2.3	0.5	374	1122	1.5	3	0.568144	Current	1920	active	Yes	No	8477.69	0.423428	0
100280	Female	33	Non-Hispanic White	High school diploma	Married/living with partner	5	high	2	143	101.2	161.2	yes	No	3.6	3	0.6	407	488.4	0.72	1.2	0.627792	Never	6000	active	Yes	No	25983	0.691583	0
100288	Female	43	Other Race	<High school diploma	Married/living with partner	1.15	low	2	148	140.4	162.1	no	No	5	1.9	0.5	246	647.368	1.31579	2.63158	0.866132	Never	1840	active	No	No	2333.75	0.666659	0
100292	Female	56	Other Race	High school diploma	Living alone	0.61	low	2	142	125.3	155	yes	No	6.6	2.1	0.7	270	848.571	2.2	3.14286	0.808387	Former	720	active	No	Yes	8673.99	0.728755	1
100299	Female	27	Non-Hispanic Non-Hispanic White	College diploma	Married/living with partner	2.6	medium	1	143	123	165.7	yes	No	5	2.4	0.9	342	712.5	1.875	2.08333	0.742305	Never	1680	active	No	No	7622.19	0.45459	0
100303	Male	60	Mexican American	<High school diploma	Married/living with partner	1.92	medium	2	143	96.5	170.3	yes	No	3.3	2.3	0.5	224	321.391	0.717391	1.43478	0.566647	Never	7200	active	Yes	No	2200.83	0.184994	0
100319	Female	47	Non-Hispanic White	High school diploma	Living alone	1.66	medium	1	135	122.5	165.3	yes	No	4.8	2	0.4	180	432	0.96	2.4	0.741077	Former	720	active	No	Yes	8912.71	1.1672	0
100324	Female	46	Other Hispanic	High school diploma	Married/living with partner	1.82	medium	1	134	86.2	154.1	yes	No	5.5	3.1	0.9	281	498.548	1.59677	1.77419	0.559377	Never	4080	active	No	Yes	8620.12	0.470367	0
100326	Female	21	Non-Hispanic Non-Hispanic White	High school diploma	Living alone	0.59	low	1	147	103.7	153.7	yes	No	3.8	3.2	0.5	471	559.312	0.59375	1.1875	0.674691	Never	0	inactive	No	No	7140.37	0.428627	0
100332	Male	43	Non-Hispanic White	College diploma	Married/living with partner	2.01	medium	2	142	89.6	169.5	yes	No	2.3	1.8	0.6	211	269.611	0.766667	1.27778	0.528614	Never	23280	active	No	No	23164.6	0.300777	0
100338	Male	45	Non-Hispanic White	College diploma	Married/living with partner	0.35	low	1	143	93.2	176.8	no	No	4.2	1.8	0.5	270	630	1.16667	2.33333	0.527149	Never	1440	active	No	No	5236.73	1.49086	0
100348	Female	49	Non-Hispanic Non-Hispanic White	College diploma	Married/living with partner	5	high	1	144	102.5	156.1	no	No	3.5	2.8	0.5	306	382.5	0.625	1.25	0.65663	Never	10320	active	Yes	No	4047.29	0.328845	0
100358	Female	62	Mexican American	<High school diploma	Living alone	0.73	low	2	143	122.4	165.6	yes	No	7.9	3.1	0.9	202	514.774	2.29355	2.54839	0.73913	Never	8400	active	Yes	Yes	2052.07	0.631056	1
100373	Male	74	Other Race	College diploma	Married/living with partner	3.86	high	1	148	83.8	166.8	yes	No	2.6	1.7	0.5	277	423.647	0.764706	1.52941	0.502398	Never	2400	active	No	No	3546.45	0.189993	0
100377	Male	47	Other Race	College diploma	Married/living with partner	5	high	2	148	92.1	160.9	yes	No	5.5	2.1	0.6	271	709.762	1.57143	2.61905	0.572405	Never	0	inactive	No	No	1737.25	0.589023	0
100386	Female	37	Mexican American	College diploma	Married/living with partner	1.99	medium	2	135	121.3	159.1	yes	No	6.4	2.3	0.3	232	645.565	0.834783	2.78261	0.762414	Never	2880	active	No	Yes	3687.92	0.542504	0
100389	Female	55	Non-Hispanic Non-Hispanic White	<High school diploma	Living alone	0.62	low	2	142	106.4	159.2	yes	No	3	1.6	0.5	197	369.375	0.9375	1.875	0.668342	Current	14640	active	Yes	No	5054.61	0.620159	0
100412	Female	65	Mexican American	<High school diploma	Married/living with partner	1	low	1	137	104	159.5	yes	No	3.4	1.9	0.4	200	357.895	0.715789	1.78947	0.652038	Never	300	inactive	Yes	Yes	1679.03	1.24227	0
100418	Male	31	Non-Hispanic White	College diploma	Married/living with partner	5	high	1	141	85.3	179.1	yes	No	1.9	2.6	0.6	220	160.769	0.438462	0.730769	0.47627	Never	4640	active	No	No	32778	0.25791	0
100422	Male	66	Non-Hispanic Non-Hispanic White	College diploma	Living alone	3.07	medium	1	146	77.7	181.5	yes	No	2.6	1.8	0.6	193	278.778	0.866667	1.44444	0.428099	Current	28080	active	Yes	Yes	1182.77	0.253469	0
100446	Male	60	Other Hispanic	College diploma	Married/living with partner	5	high	2	140	123	172.5	yes	No	3.2	2.1	0.4	196	298.667	0.609524	1.52381	0.713043	Never	0	inactive	No	Yes	1876.26	1.13668	0
100447	Male	50	Non-Hispanic White	College diploma	Living alone	2.03	medium	1	137	103.6	181.6	yes	No	3.5	1	0.7	200	700	2.45	3.5	0.570485	Never	9960	active	Yes	Yes	6304.1	0.440088	0
100451	Female	40	Other Race	College diploma	Married/living with partner	1.79	medium	1	137	80.8	155.9	no	No	5.7	2.3	0.4	199	493.174	0.991304	2.47826	0.518281	Never	2640	active	No	No	4531.47	0.20359	0
100463	Male	28	Non-Hispanic Non-Hispanic White	High school diploma	Living alone	1.05	low	1	137	74.5	175	yes	No	10.4	2	1.2	210	1092	6.24	5.2	0.425714	Current	11040	active	No	No	5755.39	0.195535	0
100483	Female	51	Mexican American	<High school diploma	Married/living with partner	1.96	medium	1	137	103.7	158.9	yes	No	3.1	3.1	0.4	280	280	0.4	1	0.652612	Never	0	inactive	No	Yes	3083.96	1.50368	0
100508	Female	80	Non-Hispanic White	College diploma	Living alone	1.66	medium	1	142	81.6	158.2	yes	No	3.6	1.7	0.7	187	396	1.48235	2.11765	0.515803	Never	19600	active	Yes	No	4898.06	0.28175	0
100511	Female	64	Non-Hispanic Non-Hispanic White	College diploma	Living alone	1.58	medium	2	145	99.5	158.5	yes	No	1.7	1.6	0.3	250	265.625	0.31875	1.0625	0.62776	Former	2400	active	Yes	No	2751.44	0.294594	0
100514	Male	37	Mexican American	High school diploma	Married/living with partner	1.91	medium	1	136	111.6	166.5	yes	No	4.1	3	0.7	275	375.833	0.956667	1.36667	0.67027	Never	6720	active	No	Yes	11474.2	1.24953	0
100516	Male	61	Other Hispanic	College diploma	Married/living with partner	1.79	medium	1	145	118.5	173.8	yes	No	1.6	2.2	0.5	238	173.091	0.363636	0.727273	0.681818	Former	3600	active	Yes	Yes	2058.75	0.402376	0
100517	Male	39	Non-Hispanic White	College diploma	Married/living with partner	5	high	2	143	93.7	188.7	yes	No	2.6	2.6	0.5	328	328	0.5	1	0.496555	Current	4320	active	Yes	No	28103	0.602893	0
100521	Male	58	Other Race	College diploma	Married/living with partner	5	high	1	148	103.1	183.7	yes	No	2.3	1.6	0.6	241	346.438	0.8625	1.4375	0.561241	Former	3360	active	Yes	Yes	1954.37	0.627718	0
100557	Male	52	Non-Hispanic Non-Hispanic White	College diploma	Married/living with partner	4.9	high	1	134	92.4	171.9	yes	No	3.9	3.1	0.5	265	333.387	0.629032	1.25806	0.537522	Never	7680	active	No	No	4338.32	0.564664	0
100565	Male	70	Non-Hispanic White	High school diploma	Married/living with partner	1.79	medium	2	139	104.2	171.1	yes	No	5.9	2	0.8	254	749.3	2.36	2.95	0.609001	Current	0	inactive	Yes	No	1679.51	1.59411	0
100568	Male	46	Mexican American	College diploma	Married/living with partner	4.78	high	2	136	114.1	171.8	yes	No	4.2	1.5	0.5	188	526.4	1.4	2.8	0.664144	Never	1680	active	No	Yes	2314.93	0.867044	0
100576	Male	62	Other Hispanic	College diploma	Living alone	1	low	1	140	113.8	164.7	yes	No	5.4	1.9	0.8	238	676.421	2.27368	2.84211	0.690953	Former	240	inactive	Yes	Yes	2630.38	0.733332	0
100581	Male	78	Non-Hispanic Non-Hispanic White	<High school diploma	Living alone	1.46	medium	2	145	114.3	169.4	yes	No	2.5	2	0.5	228	285	0.625	1.25	0.674734	Former	0	inactive	No	Yes	1491.91	0.811906	0
100584	Male	63	Non-Hispanic White	College diploma	Married/living with partner	5	high	1	134	98.7	177.2	yes	No	7.5	2.4	0.8	186	581.25	2.5	3.125	0.556998	Current	2160	active	No	Yes	17957.3	0.957627	1
100586	Male	80	Non-Hispanic White	<High school diploma	Married/living with partner	1.36	medium	2	135	113	166	yes	No	6.6	2.1	0.8	287	902	2.51429	3.14286	0.680723	Former	0	inactive	Yes	Yes	2837.99	0.683845	1
100608	Female	64	Mexican American	College diploma	Living alone	0.53	low	2	140	113.2	153.2	yes	No	6.7	3.6	1	272	506.222	1.86111	1.86111	0.738903	Current	360	inactive	Yes	Yes	3380.4	1.5729	0
100617	Male	76	Non-Hispanic White	College diploma	Married/living with partner	4.86	high	2	143	116	185.6	yes	No	6.6	1.7	0.9	307	1191.88	3.49412	3.88235	0.625	Former	120	inactive	Yes	Yes	15511.4	1.58736	1
100623	Female	36	Non-Hispanic White	College diploma	Married/living with partner	5	high	2	143	87.3	171.3	yes	No	3.5	1.7	0.3	251	516.765	0.617647	2.05882	0.509632	Never	240	inactive	No	No	21622.3	0.55916	0
100624	Male	23	Mexican American	High school diploma	Married/living with partner	0.49	low	2	148	106.3	170	yes	No	2.9	1.9	0.4	235	358.684	0.610526	1.52632	0.625294	Former	9600	active	No	No	5669.68	0.247864	0
100644	Female	31	Non-Hispanic White	College diploma	Living alone	0.13	low	1	140	86	161.2	yes	No	5.2	1.8	0.5	133	384.222	1.44444	2.88889	0.533499	Never	5280	active	No	No	5001.1	0.710157	0
100649	Male	43	Non-Hispanic White	High school diploma	Married/living with partner	1.51	medium	2	142	104.6	172.3	yes	No	4.2	1.5	0.4	221	618.8	1.12	2.8	0.607081	Never	0	inactive	No	No	5407.68	0.745842	0
100663	Female	71	Non-Hispanic White	College diploma	Married/living with partner	5	high	2	147	105.5	165.3	yes	No	2.9	1.1	0.5	228	601.091	1.31818	2.63636	0.638234	Never	480	inactive	Yes	No	28569.1	0.646156	0
100675	Female	21	Non-Hispanic Non-Hispanic White	High school diploma	Living alone	1.54	medium	1	138	104.2	156.7	no	No	2.1	2.2	0.4	310	295.909	0.381818	0.954545	0.664965	Never	0	inactive	No	Yes	7566.51	0.301249	0
100677	Female	56	Non-Hispanic White	College diploma	Married/living with partner	1.98	medium	1	135	91.7	167.5	yes	No	3.3	2.3	0.5	229	328.565	0.717391	1.43478	0.547463	Never	0	inactive	Yes	No	9573.84	0.208492	0
100693	Female	49	Non-Hispanic Non-Hispanic White	College diploma	Married/living with partner	4.98	high	2	144	118.2	163.7	yes	No	4.5	1.9	0.6	359	850.263	1.42105	2.36842	0.722053	Never	180	inactive	Yes	Yes	4630.74	0.671591	1
100698	Female	48	Other Race	College diploma	Married/living with partner	5	high	1	137	80	163.7	yes	No	3.1	1.7	0.4	232	423.059	0.729412	1.82353	0.488699	Never	2480	active	No	No	2708.9	0.261018	0
100705	Female	56	Non-Hispanic White	High school diploma	Living alone	2.16	medium	1	139	118	161.9	yes	No	4.2	1.8	0.5	227	529.667	1.16667	2.33333	0.728845	Former	0	inactive	No	No	26787.7	0.973576	1
100713	Female	38	Non-Hispanic White	College diploma	Living alone	3.92	high	1	134	87.2	164.6	yes	No	4.4	1.9	0.5	304	704	1.15789	2.31579	0.529769	Former	3720	active	No	No	20837.7	0.185104	0
100714	Female	37	Non-Hispanic White	College diploma	Married/living with partner	1.63	medium	1	145	95.5	171	yes	No	4.1	1.2	0.5	172	587.667	1.70833	3.41667	0.55848	Never	1560	active	No	No	11741.7	0.330149	0
100717	Female	49	Non-Hispanic White	College diploma	Living alone	0.82	low	2	137	131.4	168.5	yes	No	4.8	2.2	0.6	225	490.909	1.30909	2.18182	0.779822	Current	5760	active	Yes	No	2666.86	0.725782	0
100725	Female	67	Other Race	<High school diploma	Married/living with partner	3.94	high	2	138	96.2	158.9	no	No	2.6	1.7	0.5	202	308.941	0.764706	1.52941	0.605412	Never	0	inactive	Yes	No	3285.11	0.311911	0
100727	Male	26	Non-Hispanic White	College diploma	Married/living with partner	2.55	medium	2	139	97	177.6	yes	No	2.6	1.6	0.5	300	487.5	0.8125	1.625	0.546171	Never	0	inactive	Yes	No	1704.03	0.789305	0
100730	Female	44	Non-Hispanic White	College diploma	Married/living with partner	1.99	medium	2	139	110	157.9	yes	No	4.9	1.5	0.4	323	1055.13	1.30667	3.26667	0.696643	Never	4680	active	No	No	1421.39	0.811281	0
100733	Female	44	Other Race	College diploma	Married/living with partner	3.04	medium	2	135	112.5	160.8	no	No	3.8	3.1	0.4	329	403.29	0.490323	1.22581	0.699627	Never	28800	active	No	No	4558.53	1.3925	0
100747	Female	55	Other Race	High school diploma	Married/living with partner	1.22	low	1	141	95.6	158.2	yes	No	2.2	2	0.5	177	194.7	0.55	1.1	0.604298	Never	0	inactive	Yes	No	46453.5	0.781004	1
100771	Female	68	Non-Hispanic White	High school diploma	Living alone	0.7	low	1	145	112.6	162.6	no	No	5.9	2	0.5	303	893.85	1.475	2.95	0.692497	Former	5040	active	Yes	No	6969.35	0.458037	0
100801	Male	34	Non-Hispanic White	High school diploma	Married/living with partner	0.43	low	2	139	111.5	173.1	yes	No	4.6	1.4	0.5	241	791.857	1.64286	3.28571	0.644136	Current	17520	active	No	No	5028	0.562708	0
100817	Female	60	Other Race	College diploma	Living alone	2.8	medium	1	138	96.3	160.4	yes	No	3.3	1.7	0.7	255	495	1.35882	1.94118	0.600374	Never	40800	active	No	No	1729.52	0.302447	0
100819	Male	30	Non-Hispanic Non-Hispanic White	College diploma	Living alone	1.18	low	1	144	70.5	163.6	no	No	4.3	2	0.4	217	466.55	0.86	2.15	0.430929	Never	2640	active	No	No	2967.88	0.0746659	0
100821	Female	68	Other Hispanic	College diploma	Married/living with partner	1.45	medium	1	140	84.7	160.8	yes	No	5.3	2	0.6	315	834.75	1.59	2.65	0.526741	Never	0	inactive	Yes	Yes	2842.82	0.944593	1
100829	Male	43	Non-Hispanic Non-Hispanic White	<High school diploma	Married/living with partner	1.13	low	2	147	114.3	178	yes	No	1.6	1.3	0.3	253	311.385	0.369231	1.23077	0.642135	Never	1440	active	No	No	3325	0.725051	0
100853	Male	80	Mexican American	College diploma	Married/living with partner	3.37	medium	2	136	120.2	170.1	yes	No	2.4	0.7	0.4	128	438.857	1.37143	3.42857	0.706643	Never	3600	active	Yes	Yes	4424.63	0.399046	0
100856	Female	75	Other Race	College diploma	Living alone	5	high	1	136	81.6	157.4	yes	No	5.2	1.5	0.6	193	669.067	2.08	3.46667	0.518424	Former	0	inactive	Yes	No	2954.29	0.187013	1
100860	Female	36	Non-Hispanic Non-Hispanic White	<High school diploma	Living alone	0.99	low	2	140	127.1	169.7	yes	No	4.3	2.8	0.4	287	440.75	0.614286	1.53571	0.748969	Never	32640	active	No	Yes	6787.7	0.821746	0
100866	Male	46	Non-Hispanic White	College diploma	Married/living with partner	2.64	medium	1	145	126.6	181	yes	No	4	1.7	0.8	229	538.824	1.88235	2.35294	0.699448	Never	2160	active	Yes	No	3670.15	0.348759	1
100874	Male	55	Other Race	College diploma	Married/living with partner	3.19	medium	2	144	78	164.9	yes	No	3.3	1.5	0.5	192	422.4	1.1	2.2	0.473014	Never	7840	active	No	No	2000.61	0.288297	0
100876	Male	77	Other Race	High school diploma	Living alone	0.91	low	1	148	102.2	163.8	yes	No	1.3	1.5	0.3	188	162.933	0.26	0.866667	0.623932	Former	760	active	Yes	Yes	3676.44	0.277809	1
100880	Male	46	Non-Hispanic White	High school diploma	Living alone	1.27	low	2	139	113.5	185.3	yes	No	5.3	4.5	0.8	267	314.467	0.942222	1.17778	0.61252	Current	14400	active	No	No	5085.94	1.56672	1
100881	Male	26	Non-Hispanic Non-Hispanic White	High school diploma	Living alone	1.76	medium	1	137	86.9	185.3	yes	No	2.1	1.6	0.3	179	234.938	0.39375	1.3125	0.468969	Never	0	inactive	No	No	5729.05	1.28391	0
100892	Male	23	Mexican American	College diploma	Living alone	3.29	medium	2	137	86.5	168	yes	No	2.9	1.5	0.3	201	388.6	0.58	1.93333	0.514881	Never	6240	active	No	No	8696.75	0.227664	0
100895	Female	58	Other Race	College diploma	Married/living with partner	2.38	medium	2	135	89	156.9	no	No	5.3	2.3	0.5	236	543.826	1.15217	2.30435	0.56724	Never	1200	active	Yes	No	3676.74	0.399059	0
100896	Female	28	Non-Hispanic White	<High school diploma	Living alone	0.31	low	2	142	118.5	160.8	yes	No	3.3	3.7	0.5	170	151.622	0.445946	0.891892	0.73694	Never	10080	active	Yes	No	20975.5	0.963194	0
100905	Male	80	Non-Hispanic White	College diploma	Married/living with partner	5	high	1	144	115	182.9	yes	No	3.3	1	0.4	174	574.2	1.32	3.3	0.628759	Former	660	active	No	No	5788.43	0.64923	0
100911	Male	26	Non-Hispanic White	College diploma	Married/living with partner	2.55	medium	1	135	103	184.1	no	No	2.8	3.7	0.6	210	158.919	0.454054	0.756757	0.559479	Never	9960	active	Yes	No	28974.8	0.437612	0
100915	Male	67	Non-Hispanic White	<High school diploma	Married/living with partner	3.86	high	2	145	114.8	169.2	yes	No	3.9	1.9	0.8	210	431.053	1.64211	2.05263	0.678487	Former	0	inactive	Yes	No	26543.1	0.597788	1
100928	Male	25	Non-Hispanic White	<High school diploma	Married/living with partner	2.08	medium	1	146	76.6	173.1	yes	No	4.3	2.6	0.5	217	358.885	0.826923	1.65385	0.442519	Current	29340	active	No	No	23878.6	0.216907	0
100934	Female	37	Non-Hispanic White	College diploma	Married/living with partner	5	high	1	135	109	163.8	yes	No	3.4	2.2	0.4	262	404.909	0.618182	1.54545	0.665446	Never	10320	active	No	No	12527.9	0.206638	1
100935	Male	20	Non-Hispanic Non-Hispanic White	High school diploma	Married/living with partner	1.07	low	2	143	75.2	184.9	yes	No	4	2.4	1.2	267	445	2	1.66667	0.406706	Current	0	inactive	No	No	7030.13	0.199133	0
100949	Female	51	Non-Hispanic Non-Hispanic White	College diploma	Married/living with partner	5	high	2	135	106.8	163.8	yes	No	6	1.9	0.6	255	805.263	1.89474	3.15789	0.652015	Never	0	inactive	Yes	No	1443.14	0.296095	0
100952	Male	21	Non-Hispanic White	College diploma	Living alone	4.19	high	1	143	80	183.4	yes	No	2.5	2.2	0.7	203	230.682	0.795455	1.13636	0.436205	Current	16320	active	No	No	27149.3	0.200654	0
100961	Female	20	Non-Hispanic White	High school diploma	Living alone	1.99	medium	2	139	69.9	169.3	yes	No	4.2	2.4	0.7	206	360.5	1.225	1.75	0.412877	Never	22880	active	No	No	9338.57	0.190744	0
100966	Female	37	Non-Hispanic White	College diploma	Married/living with partner	1.61	medium	1	142	81.4	156.2	yes	No	4.5	1.7	0.6	169	447.353	1.58824	2.64706	0.521127	Never	0	inactive	No	No	7722.93	0.35092	0
100973	Male	28	Other Race	College diploma	Married/living with partner	2.35	medium	1	145	116.6	186	yes	No	3	1.4	0.5	207	443.571	1.07143	2.14286	0.626882	Current	8520	active	No	No	3532.53	0.384927	0
100985	Male	23	Non-Hispanic White	High school diploma	Living alone	1.22	low	1	141	81	178.7	no	No	2.5	1.7	0.5	210	308.824	0.735294	1.47059	0.453274	Never	2880	active	No	No	50405.5	0.322044	0
100986	Female	50	Other Hispanic	<High school diploma	Married/living with partner	1.35	medium	2	136	91.5	163.1	yes	No	5.7	1.4	0.5	214	871.286	2.03571	4.07143	0.561006	Never	300	inactive	Yes	Yes	2769.42	0.404916	0
100996	Male	52	Non-Hispanic White	College diploma	Married/living with partner	5	high	2	137	109.3	184.3	yes	No	7.3	1.8	0.5	228	924.667	2.02778	4.05556	0.593055	Current	4800	active	No	No	30888.1	1.0675	1
100997	Female	60	Other Hispanic	<High school diploma	Living alone	1.13	low	1	140	117.5	161.9	yes	No	3.5	2.8	0.4	227	283.75	0.5	1.25	0.725757	Former	0	inactive	Yes	No	1243.18	0.599125	1
101009	Female	21	Mexican American	High school diploma	Living alone	1.41	medium	2	143	143	172.3	yes	No	8.9	3.1	0.8	320	918.71	2.29677	2.87097	0.829948	Current	6240	active	No	No	10799.3	1.31988	0
101011	Male	23	Non-Hispanic White	College diploma	Living alone	4.41	high	1	134	106.2	176.7	yes	No	5.1	2.2	1	340	788.182	2.31818	2.31818	0.601019	Current	13920	active	No	No	28639.4	0.529534	0
101014	Female	42	Non-Hispanic White	High school diploma	Married/living with partner	0.63	low	1	142	78.5	170	yes	No	4.2	1.4	0.4	212	636	1.2	3	0.461765	Current	0	inactive	No	No	6394.4	0.34905	1
101021	Male	61	Non-Hispanic Non-Hispanic White	College diploma	Living alone	2.65	medium	2	145	110.5	172.5	yes	No	3.3	2.3	0.6	189	271.174	0.86087	1.43478	0.64058	Former	48	inactive	No	Yes	1863.01	0.196967	0
101025	Female	23	Other Race	College diploma	Married/living with partner	1.24	low	2	137	88.4	166.9	yes	No	2.4	1.8	0.3	230	306.667	0.4	1.33333	0.529658	Never	3240	active	Yes	No	5524.72	0.24574	0
101034	Female	46	Non-Hispanic White	College diploma	Married/living with partner	1.02	low	1	142	105	150.1	yes	No	4	1.8	0.5	293	651.111	1.11111	2.22222	0.699534	Never	320	inactive	No	No	6313.31	0.39212	0
101037	Female	41	Non-Hispanic White	College diploma	Married/living with partner	3.66	high	2	139	122.2	155.1	yes	No	4.8	2.8	0.6	346	593.143	1.02857	1.71429	0.787879	Never	3000	active	No	No	22841.7	0.390253	0
101064	Male	28	Other Race	College diploma	Living alone	1.85	medium	1	137	103	170.6	yes	No	3.3	2.6	0.5	252	319.846	0.634615	1.26923	0.603751	Current	5280	active	No	No	2883.58	2.28573	0
101065	Female	44	Mexican American	High school diploma	Married/living with partner	0.8	low	1	137	88.3	172.6	yes	No	2.3	1.3	0.4	164	290.154	0.707692	1.76923	0.511587	Former	4080	active	No	No	9373.76	0.302638	0
101069	Male	32	Non-Hispanic Non-Hispanic White	College diploma	Living alone	1.74	medium	1	147	95.4	174.1	yes	No	1.5	1.9	0.4	239	188.684	0.315789	0.789474	0.547961	Never	11880	active	No	No	3242.24	0.4039	0
101070	Female	34	Mexican American	College diploma	Married/living with partner	2.63	medium	2	135	101.4	166.4	yes	No	3.1	1.6	0.5	237	459.188	0.96875	1.9375	0.609375	Never	2880	active	No	No	5799.41	0.316482	0
101076	Female	22	Other Race	High school diploma	Married/living with partner	4.25	high	2	140	78.5	158.6	yes	No	4.6	2.1	0.6	259	567.333	1.31429	2.19048	0.494956	Former	3600	active	No	No	5504.21	0.275181	0
101079	Female	51	Other Race	High school diploma	Living alone	1.47	medium	1	138	78	155	yes	No	1.7	1.7	0.4	283	283	0.4	1	0.503226	Former	360	inactive	Yes	No	3870.39	0.140507	0
101085	Male	31	Other Race	College diploma	Married/living with partner	2.79	medium	2	143	129.6	185.5	yes	No	4.1	1.8	0.6	180	410	1.36667	2.27778	0.698652	Former	13440	active	Yes	No	17696.8	0.822607	0
101087	Female	51	Non-Hispanic White	High school diploma	Married/living with partner	3.34	medium	2	143	73.4	159.7	yes	No	5.6	1.6	0.7	326	1141	2.45	3.5	0.459612	Current	7200	active	Yes	Yes	20937.6	0.369792	1
101091	Female	58	Non-Hispanic Non-Hispanic White	College diploma	Living alone	2.77	medium	1	144	116.9	161.8	yes	Yes	1.7	3.3	0.4	258	132.909	0.206061	0.515152	0.722497	Never	0	inactive	Yes	No	6125.59	3.9023	0
101097	Female	39	Other Hispanic	<High school diploma	Married/living with partner	0.51	low	2	134	111.1	155.3	yes	No	4.3	2.1	0.5	268	548.762	1.02381	2.04762	0.71539	Never	0	inactive	No	No	8860.78	2.04765	0
101102	Male	80	Non-Hispanic White	College diploma	Married/living with partner	1.03	low	2	139	111.5	175.6	no	No	2.7	1	0.5	156	421.2	1.35	2.7	0.634966	Never	0	inactive	No	No	1398.57	0.467195	0
101106	Female	49	Non-Hispanic Non-Hispanic White	College diploma	Living alone	5	high	1	144	112.4	166.3	yes	No	4.5	2.1	0.3	205	439.286	0.642857	2.14286	0.675887	Current	600	active	Yes	No	1890.77	0.524016	0
101107	Female	44	Mexican American	<High school diploma	Married/living with partner	1.58	medium	2	135	98	158	no	No	1.9	1.8	0.4	150	158.333	0.422222	1.05556	0.620253	Never	40320	active	No	No	4936.52	0.315166	0
101108	Female	59	Other Race	College diploma	Married/living with partner	5	high	1	139	83.5	151.9	yes	No	3.8	2.3	0.6	315	520.435	0.991304	1.65217	0.549704	Former	0	inactive	Yes	No	2197.22	0.407959	1
101115	Female	36	Non-Hispanic Non-Hispanic White	College diploma	Living alone	0.49	low	1	144	107.2	168.1	yes	No	3.5	3.1	0.5	198	223.548	0.564516	1.12903	0.637716	Never	13920	active	No	No	4912.95	0.209399	0
101118	Male	26	Mexican American	College diploma	Living alone	2.72	medium	2	138	117.9	184	yes	No	5.3	2.1	0.8	207	522.429	2.01905	2.52381	0.640761	Former	3720	active	No	No	5360.41	0.77798	0
101138	Female	33	Non-Hispanic White	College diploma	Married/living with partner	5	high	2	140	121.4	171.4	yes	No	4.5	2.8	0.7	196	315	1.125	1.60714	0.708285	Former	480	inactive	No	No	23438.9	0.447699	0
101141	Male	54	Mexican American	High school diploma	Married/living with partner	0.06	low	2	142	115.8	178.2	yes	No	3.7	1.6	0.4	188	434.75	0.925	2.3125	0.649832	Never	21600	active	No	No	4770.36	0.74866	0
101153	Male	42	Non-Hispanic Non-Hispanic White	College diploma	Married/living with partner	5	high	1	143	112.5	188.3	yes	No	1.8	2.1	0.4	262	224.571	0.342857	0.857143	0.597451	Never	3936	active	No	No	7584.33	0.334353	1
101166	Female	28	Non-Hispanic White	College diploma	Living alone	1.69	medium	2	145	69.4	164.7	yes	No	2.2	2.1	0.5	203	212.667	0.52381	1.04762	0.421372	Never	1200	active	No	No	13791.6	0.164113	0
101174	Male	35	Non-Hispanic Non-Hispanic White	College diploma	Married/living with partner	1.84	medium	1	147	96.8	183.8	yes	No	2.9	2.6	0.5	230	256.538	0.557692	1.11538	0.526659	Current	640	active	No	No	3638.59	0.552483	0
101175	Male	55	Non-Hispanic White	College diploma	Living alone	1.58	medium	1	145	107.6	172.3	yes	No	4	1.4	0.4	146	417.143	1.14286	2.85714	0.624492	Former	0	inactive	Yes	Yes	4233.04	0.422989	0
101177	Male	64	Mexican American	<High school diploma	Married/living with partner	0.56	low	1	137	87.2	165	yes	No	3.5	1.9	0.5	152	280	0.921053	1.84211	0.528485	Never	7200	active	Yes	No	1149.67	0.640149	0
101180	Female	80	Non-Hispanic White	College diploma	Married/living with partner	4.43	high	1	144	96.4	168.7	yes	No	2.9	1.4	0.5	189	391.5	1.03571	2.07143	0.571429	Never	768	active	No	No	5544.55	0.272754	1
101181	Female	50	Other Hispanic	College diploma	Living alone	4.74	high	1	134	82	156.7	yes	No	3.1	1.1	0.5	197	555.182	1.40909	2.81818	0.523293	Never	2880	active	No	No	7184.74	0.64769	1
101186	Male	35	Other Hispanic	College diploma	Married/living with partner	5	high	1	134	94.9	171.5	yes	No	2.3	3.7	0.5	225	139.865	0.310811	0.621622	0.553353	Never	3600	active	No	No	13245.3	0.231605	0
101191	Female	35	Non-Hispanic White	High school diploma	Married/living with partner	2.41	medium	2	146	105	158.5	yes	No	5.6	2.7	0.8	435	902.222	1.65926	2.07407	0.662461	Current	3480	active	Yes	No	15300.7	0.763722	0
101193	Male	63	Other Hispanic	College diploma	Married/living with partner	5	high	2	135	95.3	169.7	yes	No	2.7	1.1	0.3	164	402.545	0.736364	2.45455	0.561579	Former	1620	active	Yes	No	3083.51	0.412059	1
101214	Male	23	Other Race	College diploma	Living alone	1.79	medium	2	135	89.2	164.9	yes	No	4.5	1.6	0.4	272	765	1.125	2.8125	0.540934	Never	1240	active	No	No	2942.57	0.145683	0
101216	Female	55	Non-Hispanic Non-Hispanic White	High school diploma	Living alone	0.11	low	1	145	122	164.6	yes	No	4	2.6	0.9	181	278.462	1.38462	1.53846	0.741191	Current	4840	active	Yes	No	3470.92	0.693069	0
101226	Male	44	Other Race	<High school diploma	Married/living with partner	1.15	low	2	148	100	167.7	no	No	4.1	2.2	0.7	130	242.273	1.30455	1.86364	0.596303	Current	14400	active	Yes	No	2414.05	1.64336	0
101230	Female	50	Non-Hispanic Non-Hispanic White	College diploma	Living alone	1.05	low	1	137	107.2	159	yes	No	5.4	2.4	0.7	191	429.75	1.575	2.25	0.674214	Current	1920	active	No	No	4556.24	0.243333	0
101238	Male	36	Other Hispanic	College diploma	Married/living with partner	2.69	medium	1	138	91.4	174.2	yes	No	3.1	1.5	0.5	211	436.067	1.03333	2.06667	0.524684	Former	0	inactive	No	No	8449.17	0.107392	0
101243	Male	63	Non-Hispanic White	College diploma	Married/living with partner	2	medium	2	142	95	174.1	yes	No	4.4	2.8	0.7	256	402.286	1.1	1.57143	0.545663	Current	0	inactive	Yes	No	7853.36	0.444582	1
101247	Male	38	Other Race	College diploma	Married/living with partner	3.86	high	1	141	86.9	166.8	yes	No	3.3	1.9	0.3	187	324.789	0.521053	1.73684	0.520983	Never	4080	active	No	No	2974.31	0.371543	0
101252	Female	33	Other Race	College diploma	Living alone	0.82	low	2	144	120.8	157	no	No	2.2	2.7	0.4	319	259.926	0.325926	0.814815	0.769427	Never	0	inactive	No	No	2511.24	0.492663	0
101254	Female	29	Non-Hispanic Non-Hispanic White	College diploma	Married/living with partner	3.98	high	2	144	69.1	163.5	yes	No	3.1	2.4	0.6	203	262.208	0.775	1.29167	0.42263	Former	23520	active	No	No	8524.8	0.215182	0
101273	Male	67	Other Hispanic	College diploma	Living alone	5	high	1	140	125.4	170.9	yes	No	3.8	2	0.6	171	324.9	1.14	1.9	0.733762	Never	2160	active	Yes	No	3005.88	1.61573	0
101278	Male	44	Other Race	High school diploma	Married/living with partner	1.22	low	1	137	106.5	182.8	yes	No	4.2	2.3	0.7	228	416.348	1.27826	1.82609	0.582604	Never	1920	active	No	No	2620.17	0.721207	0
101281	Female	34	Mexican American	<High school diploma	Married/living with partner	0.41	low	2	138	86	150.3	yes	No	3.4	2.3	0.3	215	317.826	0.443478	1.47826	0.572189	Never	1680	active	No	No	6202.77	0.211476	0
101284	Female	65	Non-Hispanic Non-Hispanic White	High school diploma	Living alone	1.22	low	2	146	114.5	165.1	yes	No	1.6	3.6	0.6	218	96.8889	0.266667	0.444444	0.693519	Never	4620	active	Yes	Yes	2589.04	0.410372	0
101300	Female	35	Other Hispanic	College diploma	Married/living with partner	3.66	high	1	134	94.6	163.9	yes	No	5.2	1.9	0.5	338	925.053	1.36842	2.73684	0.577181	Never	0	inactive	No	No	10228.8	0.768051	0
101307	Female	47	Non-Hispanic Non-Hispanic White	High school diploma	Living alone	0.77	low	1	137	134.8	170.3	yes	No	3.3	1.6	0.4	212	437.25	0.825	2.0625	0.791544	Never	0	inactive	Yes	No	3232.31	0.425455	0
101308	Female	25	Non-Hispanic White	College diploma	Living alone	4.81	high	2	140	85.6	171.4	no	No	4.1	2.2	0.4	208	387.636	0.745455	1.86364	0.499417	Never	0	inactive	No	No	18401.8	0.284619	0
101323	Female	74	Non-Hispanic Non-Hispanic White	High school diploma	Living alone	2.13	medium	2	145	117.1	162.2	yes	No	4	1	0.5	222	888	2	4	0.721948	Current	0	inactive	Yes	Yes	2847.43	0.294433	1
101330	Female	22	Non-Hispanic White	College diploma	Living alone	1.71	medium	1	138	76.7	164.5	yes	No	3	3	0.5	247	247	0.5	1	0.466261	Never	960	active	No	No	12372.1	0.217839	0
101336	Female	72	Non-Hispanic White	College diploma	Married/living with partner	2.04	medium	2	139	97	160.6	yes	No	2.9	1.1	0.6	262	690.727	1.58182	2.63636	0.603985	Never	1000	active	Yes	No	6923.5	0.5298	0
101339	Male	63	Mexican American	<High school diploma	Married/living with partner	1.16	low	2	137	109.9	163.8	yes	No	2.8	3.1	0.8	160	144.516	0.722581	0.903226	0.67094	Current	160	inactive	Yes	Yes	1160.83	0.845697	0
101342	Female	41	Non-Hispanic White	College diploma	Married/living with partner	2.55	medium	2	141	148.6	167.7	yes	No	5.3	2.5	0.6	331	701.72	1.272	2.12	0.886106	Current	0	inactive	No	No	5363.63	0.780713	0
101343	Male	80	Non-Hispanic White	College diploma	Married/living with partner	5	high	1	138	118.6	171.4	yes	No	4.5	32.1	0.7	115	16.1215	0.0981308	0.140187	0.691949	Former	960	active	Yes	No	8120.74	0.580248	1
101355	Male	46	Non-Hispanic Non-Hispanic White	High school diploma	Living alone	1.2	low	1	146	104	182	yes	No	1.8	1.7	0.5	221	234	0.529412	1.05882	0.571429	Never	7200	active	Yes	No	3874.62	2.40792	0
101356	Female	54	Non-Hispanic White	College diploma	Married/living with partner	5	high	1	146	72.5	165.6	yes	No	1.7	2.1	0.3	223	180.524	0.242857	0.809524	0.437802	Former	1920	active	Yes	No	29159.5	0.0966019	0
101359	Female	52	Mexican American	<High school diploma	Married/living with partner	1.52	medium	1	135	89	155.5	yes	No	6.3	2.1	0.5	226	678	1.5	3	0.572347	Never	2400	active	No	No	3882.94	0.601458	0
101360	Male	46	Non-Hispanic White	College diploma	Married/living with partner	1.93	medium	2	142	99.1	171.5	yes	No	3.5	2.1	0.6	171	285	1	1.66667	0.577843	Never	2880	active	Yes	No	19343.4	1.16522	0
101366	Female	52	Other Race	College diploma	Married/living with partner	4.93	high	2	134	80.7	163.8	yes	No	2.7	1.5	0.3	227	408.6	0.54	1.8	0.492674	Never	720	active	Yes	No	4617.51	0.696368	0
101370	Female	31	Other Hispanic	College diploma	Married/living with partner	5	high	2	138	75.4	165	yes	No	2.5	1.6	0.4	223	348.438	0.625	1.5625	0.45697	Never	2040	active	No	No	13117.6	0.139444	0
101372	Female	29	Other Race	High school diploma	Married/living with partner	2.43	medium	1	143	80.8	156.3	no	No	5.6	1.9	0.4	272	801.684	1.17895	2.94737	0.516955	Never	280	inactive	No	No	4456.12	0.25214	0
101396	Female	80	Non-Hispanic White	College diploma	Married/living with partner	2.46	medium	1	146	118.3	161.8	yes	No	6.7	0.7	0.6	187	1789.86	5.74286	9.57143	0.73115	Never	2880	active	Yes	Yes	11323.8	0.409871	1
101398	Male	75	Non-Hispanic White	College diploma	Married/living with partner	3.65	high	2	139	130.9	175.7	yes	No	8	1.5	1	200	1066.67	5.33333	5.33333	0.74502	Never	0	inactive	Yes	Yes	1060.48	0.373111	1
101400	Male	53	Other Race	College diploma	Married/living with partner	0.89	low	1	144	99.1	169.2	yes	No	5.3	2.5	0.7	227	481.24	1.484	2.12	0.585697	Former	960	active	Yes	No	1661.22	0.79852	0
101407	Female	65	Non-Hispanic White	College diploma	Married/living with partner	5	high	2	142	86.3	155	yes	No	3.2	1.4	0.4	260	594.286	0.914286	2.28571	0.556774	Never	0	inactive	Yes	No	25394.6	0.294157	0
101412	Female	39	Other Race	College diploma	Married/living with partner	3.67	high	1	136	69.7	155.5	yes	No	2.4	2.4	0.3	313	313	0.3	1	0.448232	Never	3600	active	No	No	4455.09	0.221314	0
101416	Male	44	Non-Hispanic White	College diploma	Married/living with partner	2.52	medium	2	144	95.7	181.2	yes	No	2.9	1.6	0.3	195	353.438	0.54375	1.8125	0.528146	Never	5760	active	No	No	25372.3	0.437424	0
101427	Female	24	Non-Hispanic White	College diploma	Married/living with partner	3.31	medium	1	138	91.8	169	yes	No	6.1	1.3	0.6	226	1060.46	2.81538	4.69231	0.543195	Never	4560	active	No	No	30258.7	0.212638	0
101430	Female	42	Other Race	College diploma	Married/living with partner	4.08	high	2	148	71.6	162	yes	No	1.8	1	0.4	209	376.2	0.72	1.8	0.441975	Never	3360	active	No	No	1693.14	0.0825139	0
101446	Female	30	Other Race	College diploma	Living alone	3.73	high	1	143	74.3	173.6	yes	No	3.5	2	0.6	268	469	1.05	1.75	0.427995	Never	1680	active	Yes	No	3434.41	0.318899	0
101449	Female	59	Non-Hispanic Non-Hispanic White	College diploma	Living alone	3.29	medium	2	144	115	175.7	yes	No	4.3	2.4	0.4	245	438.958	0.716667	1.79167	0.654525	Never	160	inactive	Yes	Yes	3583.95	0.269932	1
101455	Female	66	Other Hispanic	<High school diploma	Living alone	0.9	low	1	134	123	146.3	yes	No	3.6	1.3	0.4	207	573.231	1.10769	2.76923	0.840738	Never	6800	active	Yes	No	2612.05	0.719086	0
101461	Female	59	Mexican American	<High school diploma	Living alone	0	low	2	135	124.1	144.2	yes	No	4.4	3	0.4	207	303.6	0.586667	1.46667	0.86061	Never	1680	active	No	Yes	1668.25	1.24964	0
101462	Female	23	Non-Hispanic White	College diploma	Married/living with partner	2.46	medium	1	142	143.2	160.8	yes	No	4.2	2.3	0.5	256	467.478	0.913043	1.82609	0.890547	Former	3360	active	Yes	Yes	12990	1.44894	0
101464	Female	50	Non-Hispanic White	College diploma	Living alone	1.53	medium	2	144	68.7	156	yes	No	1.9	1.1	0.3	244	421.455	0.518182	1.72727	0.440385	Never	3240	active	No	No	7653.33	0.215421	0
101472	Female	51	Other Race	College diploma	Married/living with partner	5	high	2	141	90.5	150.7	yes	No	3.2	1.7	0.5	276	519.529	0.941176	1.88235	0.600531	Never	720	active	No	No	3026.17	0.36152	0
101478	Male	60	Other Hispanic	High school diploma	Living alone	0.7	low	1	138	93.2	170.2	yes	No	4.4	2.1	0.6	173	362.476	1.25714	2.09524	0.547591	Current	960	active	No	No	3265.55	0.290389	0
101480	Male	64	Other Race	College diploma	Married/living with partner	5	high	2	138	98.6	176.3	yes	No	5.3	2.1	0.7	236	595.619	1.76667	2.52381	0.559274	Never	240	inactive	Yes	No	1109.71	0.73561	0
101484	Male	49	Non-Hispanic White	College diploma	Married/living with partner	5	high	2	140	99.7	179	yes	No	2.2	1.9	0.4	208	240.842	0.463158	1.15789	0.556983	Never	0	inactive	Yes	No	26050.8	1.10049	0
101500	Female	67	Non-Hispanic White	College diploma	Living alone	2.06	medium	1	147	116.2	170.5	yes	No	6.6	4	1	251	414.15	1.65	1.65	0.681525	Never	960	active	No	Yes	28819.3	1.38137	0
101515	Male	51	Other Hispanic	College diploma	Married/living with partner	3.66	high	1	134	109.5	180.7	yes	No	2.6	2.5	0.6	193	200.72	0.624	1.04	0.605977	Never	5360	active	No	No	5532.09	24.4831	0
101516	Female	30	Non-Hispanic White	College diploma	Married/living with partner	5	high	2	147	83.3	166.8	yes	No	3.1	1.9	0.5	171	279	0.815789	1.63158	0.4994	Former	1440	active	No	No	19680.3	0.0820623	0
101547	Female	42	Non-Hispanic White	College diploma	Living alone	1.71	medium	1	145	128.5	160.2	yes	No	4.7	2.8	0.5	273	458.25	0.839286	1.67857	0.802122	Never	0	inactive	No	No	9379.44	1.72926	0
101550	Male	53	Non-Hispanic Non-Hispanic White	College diploma	Living alone	3.23	medium	1	143	112.7	180.9	no	No	1.3	1.8	0.4	182	131.444	0.288889	0.722222	0.622996	Never	14400	active	No	No	3752.83	0.372854	0
101558	Male	54	Other Hispanic	<High school diploma	Married/living with partner	1.37	medium	1	147	96	157.9	yes	No	4	2.4	0.6	240	400	1	1.66667	0.60798	Current	240	inactive	No	No	3667.85	1.44985	0
101559	Male	27	Mexican American	<High school diploma	Married/living with partner	1.52	medium	1	144	110.5	167.7	yes	No	3.2	2.7	0.4	193	228.741	0.474074	1.18519	0.658915	Current	3480	active	No	No	5177.57	0.736617	0
101570	Female	30	Non-Hispanic Non-Hispanic White	College diploma	Married/living with partner	0.99	low	2	144	77.7	166.6	no	No	2.5	0.9	0.3	129	358.333	0.833333	2.77778	0.466387	Never	0	inactive	No	No	4861.42	0.0792552	0
101580	Male	61	Non-Hispanic Non-Hispanic White	College diploma	Married/living with partner	5	high	1	134	101.6	166.8	yes	No	3.6	1.5	0.5	254	609.6	1.2	2.4	0.609113	Never	2400	active	Yes	Yes	1593.02	0.88896	0
101581	Male	62	Non-Hispanic Non-Hispanic White	<High school diploma	Living alone	0.95	low	1	139	85.2	190.8	yes	No	5.4	2.5	0.6	225	486	1.296	2.16	0.446541	Current	9840	active	Yes	No	1676.41	0.0491319	0
101584	Female	55	Other Race	College diploma	Married/living with partner	3.04	medium	2	138	104.3	156.9	yes	No	2.9	2.6	0.4	229	255.423	0.446154	1.11538	0.664755	Never	1120	active	No	No	2812.82	0.339185	0
101588	Female	23	Other Hispanic	High school diploma	Married/living with partner	2.69	medium	1	138	74.5	158.7	yes	No	4	1.9	0.6	146	307.368	1.26316	2.10526	0.469439	Never	0	inactive	Yes	No	6574.83	0.211392	0
101590	Male	24	Mexican American	High school diploma	Living alone	5	high	2	141	112.5	170.2	yes	No	4.7	1.7	0.8	201	555.706	2.21176	2.76471	0.660987	Current	6000	active	No	No	6260.76	0.502612	0
101599	Male	22	Non-Hispanic White	College diploma	Married/living with partner	1.24	low	2	137	106.2	173.9	yes	No	3.7	2.2	0.6	295	496.136	1.00909	1.68182	0.610696	Never	1200	active	No	No	10485.1	1.0474	0
101605	Male	66	Non-Hispanic White	College diploma	Living alone	1.49	medium	1	145	94	169.3	yes	No	3.7	2.1	0.5	176	310.095	0.880952	1.7619	0.555227	Never	3520	active	Yes	No	3311.34	1.2398	0
101606	Male	58	Other Hispanic	<High school diploma	Married/living with partner	0.41	low	2	141	96.3	173.5	yes	No	3.9	2.6	0.5	238	357	0.75	1.5	0.555043	Former	0	inactive	No	No	5982.51	0.144374	0
101608	Male	62	Non-Hispanic Non-Hispanic White	College diploma	Living alone	2.59	medium	1	146	112.5	186.4	yes	No	3.5	1.1	0.8	207	658.636	2.54545	3.18182	0.603541	Former	3960	active	Yes	No	2233.2	0.392302	0
101609	Male	22	Other Race	College diploma	Living alone	5	high	1	143	72.8	165.9	yes	No	2.6	2.1	0.5	229	283.524	0.619048	1.2381	0.438819	Never	720	active	No	No	3909.23	0.118815	0
101612	Male	75	Non-Hispanic Non-Hispanic White	High school diploma	Living alone	5	high	2	134	88.2	169.6	yes	No	1.4	1.6	0.4	164	143.5	0.35	0.875	0.520047	Never	5580	active	Yes	No	2980.38	0.150079	0
101613	Male	53	Non-Hispanic Non-Hispanic White	<High school diploma	Married/living with partner	1.85	medium	1	138	112.2	175.5	yes	No	2.4	2.5	0.4	326	312.96	0.384	0.96	0.639316	Former	2520	active	Yes	Yes	2824.72	1.07598	0
101626	Female	55	Non-Hispanic White	College diploma	Married/living with partner	4.57	high	2	146	88.5	163.1	yes	No	1.9	1.6	0.4	325	385.938	0.475	1.1875	0.542612	Former	1080	active	No	No	31154	0.296394	0
101631	Female	73	Non-Hispanic White	High school diploma	Married/living with partner	3.04	medium	1	142	95.1	142.6	yes	No	3.2	1.8	0.7	245	435.556	1.24444	1.77778	0.6669	Never	0	inactive	Yes	No	11817.3	0.39968	0
101635	Female	63	Non-Hispanic White	High school diploma	Married/living with partner	3.08	medium	1	142	103.1	157.5	yes	No	4.4	1.9	0.7	256	592.842	1.62105	2.31579	0.654603	Current	9840	active	No	No	22621.4	0.443494	1
101649	Female	40	Non-Hispanic White	College diploma	Living alone	3.59	high	1	134	91.4	167.6	yes	No	3.8	2	0.5	246	467.4	0.95	1.9	0.545346	Current	1920	active	No	No	29002.9	0.45167	0
101654	Male	72	Non-Hispanic White	College diploma	Married/living with partner	2.19	medium	2	134	117.7	174.9	yes	No	4.3	1.2	0.5	179	641.417	1.79167	3.58333	0.672956	Former	0	inactive	Yes	Yes	1753.27	1.08943	1
101656	Female	60	Other Hispanic	College diploma	Married/living with partner	5	high	2	134	114.1	155.7	yes	No	4.4	2.1	0.6	184	385.524	1.25714	2.09524	0.73282	Former	600	active	Yes	Yes	3884.55	0.310611	0
101659	Female	36	Other Hispanic	College diploma	Married/living with partner	5	high	2	134	75.9	166	yes	No	2.5	2.3	0.4	268	291.304	0.434783	1.08696	0.457229	Former	2760	active	No	No	16434.7	0.0758954	0
101660	Male	65	Non-Hispanic Non-Hispanic White	College diploma	Married/living with partner	5	high	1	143	97	164.9	yes	No	4.1	2.9	0.9	203	287	1.27241	1.41379	0.588235	Never	0	inactive	No	Yes	1978.13	0.483488	1
101668	Male	38	Other Race	College diploma	Married/living with partner	1.67	medium	1	137	90.2	176.7	yes	No	4.1	1.8	0.4	266	605.889	0.911111	2.27778	0.51047	Never	0	inactive	No	No	4053.48	1.48517	0
101669	Female	28	Non-Hispanic White	<High school diploma	Married/living with partner	0.51	low	2	146	125.5	153.5	yes	No	5.9	2.3	0.4	298	764.435	1.02609	2.56522	0.81759	Current	7200	active	Yes	No	14882.3	1.03617	0
101677	Male	25	Non-Hispanic White	College diploma	Living alone	2.16	medium	1	139	112.6	180	yes	No	3.7	1.9	0.6	233	453.737	1.16842	1.94737	0.625556	Never	15840	active	No	No	15752	0.42722	0
101679	Female	62	Other Hispanic	High school diploma	Living alone	0.68	low	2	144	99.8	157.1	yes	No	2.9	1.7	0.4	218	371.882	0.682353	1.70588	0.635264	Never	0	inactive	Yes	No	3268.94	0.331378	1
101681	Female	31	Non-Hispanic Non-Hispanic White	College diploma	Living alone	0.93	low	1	147	86.2	149.5	yes	No	2	1.5	0.5	301	401.333	0.666667	1.33333	0.576589	Never	3600	active	No	No	1916.76	0.261359	0
101687	Female	75	Non-Hispanic Non-Hispanic White	College diploma	Living alone	1.06	low	2	145	94.8	158.1	yes	No	4.2	1.6	0.7	195	511.875	1.8375	2.625	0.59962	Current	280	inactive	Yes	No	4229.06	0.50528	1
101693	Female	28	Non-Hispanic White	College diploma	Married/living with partner	2.11	medium	1	136	108.9	157.5	yes	No	4.9	3.5	0.5	334	467.6	0.7	1.4	0.691429	Never	4560	active	No	No	16523.2	2.35673	0
101695	Female	45	Other Race	College diploma	Living alone	0.79	low	2	136	132.8	171.5	yes	No	3.9	2.1	0.5	188	349.143	0.928571	1.85714	0.774344	Current	0	inactive	Yes	No	1779.28	0.622408	1
101697	Female	60	Non-Hispanic White	College diploma	Married/living with partner	5	high	1	142	102.6	154.9	yes	No	2.9	1.6	0.3	235	425.938	0.54375	1.8125	0.662363	Former	1440	active	Yes	Yes	16341.3	1.78933	0
101709	Female	23	Other Hispanic	College diploma	Married/living with partner	2.55	medium	1	135	102	169.3	no	No	5.9	2.4	0.5	285	700.625	1.22917	2.45833	0.602481	Never	5760	active	No	No	8863.15	0.502154	1
101711	Male	43	Mexican American	<High school diploma	Married/living with partner	1.78	medium	2	141	117.7	171.6	yes	No	3.7	2.7	0.4	257	352.185	0.548148	1.37037	0.685897	Never	15600	active	No	No	6604.59	1.195	0
101714	Male	36	Non-Hispanic Non-Hispanic White	College diploma	Married/living with partner	3.4	medium	2	137	124	183.3	yes	No	4.9	2.2	0.8	310	690.455	1.78182	2.22727	0.676487	Never	3840	active	Yes	No	8618.39	3.13792	0
101716	Female	33	Mexican American	College diploma	Married/living with partner	1.47	medium	2	148	111.4	155.4	yes	No	5.2	2.5	0.5	323	671.84	1.04	2.08	0.71686	Never	0	inactive	No	No	3890.03	1.01825	0
101722	Male	72	Mexican American	<High school diploma	Living alone	0.58	low	2	142	103.3	162.8	yes	No	5.9	0.9	0.8	167	1094.78	5.24444	6.55556	0.634521	Never	0	inactive	Yes	Yes	1204.84	0.128037	0
101725	Female	59	Other Race	College diploma	Married/living with partner	4.62	high	2	140	75.8	152.3	yes	No	3.3	1.9	0.3	165	286.579	0.521053	1.73684	0.497702	Never	1440	active	No	No	1950.75	0.125387	0
101726	Male	61	Other Race	High school diploma	Married/living with partner	3.67	high	1	143	103.3	172.3	yes	No	5.3	1.8	0.6	194	571.222	1.76667	2.94444	0.599536	Former	0	inactive	Yes	Yes	3505.21	0.515838	0
101727	Male	37	Other Hispanic	College diploma	Married/living with partner	1.01	low	1	145	113.5	185.2	yes	No	5	2	0.8	258	645	2	2.5	0.612851	Current	2240	active	No	No	5065.39	0.649993	0
101730	Male	73	Non-Hispanic White	High school diploma	Married/living with partner	2.37	medium	2	139	122.5	172.2	yes	No	3.5	0.6	0.5	171	997.5	2.91667	5.83333	0.711382	Former	3840	active	Yes	No	1579.79	0.795272	0
101731	Male	46	Mexican American	High school diploma	Married/living with partner	0.8	low	1	137	98.5	174.9	yes	No	4.2	2.7	0.6	223	346.889	0.933333	1.55556	0.563179	Former	1920	active	No	No	14585.4	1.18746	0
101733	Female	25	Other Race	College diploma	Married/living with partner	1.46	medium	1	139	75.2	158.1	yes	No	3	1.9	0.4	199	314.211	0.631579	1.57895	0.475648	Never	1440	active	No	No	5379.2	0.215727	0
101736	Male	29	Non-Hispanic White	High school diploma	Married/living with partner	1.71	medium	1	135	144.7	181.4	yes	No	3.8	2.3	0.5	211	348.609	0.826087	1.65217	0.797685	Never	13800	active	Yes	No	11458.1	1.18994	0
101737	Male	57	Non-Hispanic White	High school diploma	Living alone	1.25	low	2	143	98.1	170.5	yes	No	5.5	2.6	0.9	260	550	1.90385	2.11538	0.575367	Current	0	inactive	Yes	No	5043.74	0.551483	0
101742	Male	37	Non-Hispanic White	College diploma	Living alone	5	high	2	139	119.3	183.7	no	No	4.1	2	0.4	312	639.6	0.82	2.05	0.649428	Never	0	inactive	Yes	No	1890.28	0.692962	0
101762	Female	80	Non-Hispanic White	College diploma	Living alone	5	high	2	138	106.2	141.7	yes	No	3.1	0.9	0.4	156	537.333	1.37778	3.44444	0.749471	Never	0	inactive	No	No	9155.44	0.479924	0
101763	Female	54	Non-Hispanic White	College diploma	Married/living with partner	1.48	medium	1	143	98.2	158.1	yes	No	2.6	3.5	0.4	191	141.886	0.297143	0.742857	0.621126	Current	1920	active	Yes	No	6686.64	0.609759	1
101772	Male	77	Non-Hispanic Non-Hispanic White	High school diploma	Married/living with partner	4.8	high	1	136	103.6	171.6	yes	No	5	2	0.9	154	385	2.25	2.5	0.60373	Former	0	inactive	Yes	Yes	2150.91	0.550256	0
101775	Male	36	Other Race	College diploma	Living alone	0.5	low	1	141	83	173.9	yes	No	2.6	2.2	0.4	273	322.636	0.472727	1.18182	0.477286	Never	120	inactive	No	No	3477.39	0.506849	0
101778	Female	64	Other Race	College diploma	Married/living with partner	5	high	1	148	67	159.7	yes	No	1.2	1.2	0.2	135	135	0.2	1	0.419537	Never	1440	active	No	No	3367.4	0.155409	1
101780	Female	65	Non-Hispanic White	College diploma	Married/living with partner	5	high	2	136	86.5	168.7	yes	No	4	1.9	0.5	209	440	1.05263	2.10526	0.512745	Never	1120	active	Yes	No	18635.5	0.478867	0
101785	Female	77	Non-Hispanic White	College diploma	Living alone	2.32	medium	1	147	113.7	163.5	yes	No	4.5	1.5	0.8	182	546	2.4	3	0.695413	Never	240	inactive	Yes	Yes	13666.4	0.362919	1
101787	Male	30	Non-Hispanic Non-Hispanic White	College diploma	Living alone	4.07	high	2	148	110.4	177	yes	No	3.4	0.6	0.9	110	623.333	5.1	5.66667	0.623729	Never	3840	active	No	No	3556.16	0.621908	0
101793	Male	57	Other Hispanic	College diploma	Married/living with partner	5	high	2	138	98.1	175.4	yes	No	4.7	2.3	0.7	273	557.87	1.43043	2.04348	0.559293	Never	1740	active	Yes	No	10898.3	0.353191	0
101799	Female	28	Non-Hispanic White	College diploma	Living alone	5	high	1	140	64.6	168.7	yes	No	2.6	1.6	0.3	215	349.375	0.4875	1.625	0.382928	Never	4080	active	No	No	1568.99	0.0778013	0
101807	Female	79	Other Race	<High school diploma	Living alone	1.1	low	1	138	79.7	139.7	no	No	4.6	2	0.6	270	621	1.38	2.3	0.570508	Former	0	inactive	Yes	Yes	2108.28	0.427881	1
101814	Female	26	Non-Hispanic White	College diploma	Married/living with partner	3.69	high	1	139	169.5	166.4	yes	No	5.3	2	0.6	295	781.75	1.59	2.65	1.01863	Never	0	inactive	No	No	10052.4	0.753786	0
101821	Female	53	Other Hispanic	College diploma	Married/living with partner	5	high	1	134	80.3	162.6	yes	No	3.8	1.9	0.4	162	324	0.8	2	0.49385	Never	720	active	No	Yes	6180.39	0.35275	0
101822	Male	40	Non-Hispanic White	<High school diploma	Living alone	2.03	medium	1	145	100.4	171.7	yes	No	5.7	2.1	0.6	264	716.571	1.62857	2.71429	0.584741	Current	12480	active	No	No	14006.4	1.66407	0
101828	Female	32	Other Race	High school diploma	Married/living with partner	1.67	medium	1	137	96.5	159.6	no	No	3.2	1.9	0.4	222	373.895	0.673684	1.68421	0.604637	Never	1120	active	No	No	5713.32	0.259953	0
101829	Male	63	Non-Hispanic White	High school diploma	Married/living with partner	5	high	2	141	138.8	169.1	yes	No	3.1	3.1	0.7	228	228	0.7	1	0.820816	Never	21840	active	Yes	Yes	17416	0.960882	0
101830	Female	45	Non-Hispanic Non-Hispanic White	College diploma	Living alone	2.79	medium	1	140	103	164.9	yes	No	3	3.2	0.6	277	259.688	0.5625	0.9375	0.624621	Never	1440	active	Yes	No	3316.98	0.305829	0
101845	Female	38	Other Race	<High school diploma	Married/living with partner	1.34	medium	1	135	108.6	165.3	yes	No	5	2	0.5	280	700	1.25	2.5	0.656987	Former	8640	active	Yes	No	6509.42	1.15731	1
101848	Female	56	Mexican American	High school diploma	Living alone	2.31	medium	2	141	72.1	160.5	yes	No	13.6	2.1	1	315	2040	6.47619	6.47619	0.449221	Current	0	inactive	No	No	4705.41	0.298515	0
101851	Male	40	Other Hispanic	<High school diploma	Living alone	2.31	medium	2	141	91.1	152.9	yes	No	3.4	2.2	0.4	246	380.182	0.618182	1.54545	0.595814	Former	3240	active	Yes	No	4569.84	3.74012	0
101861	Female	49	Non-Hispanic White	College diploma	Married/living with partner	5	high	2	141	86.1	160.8	yes	No	2.2	1.4	0.4	331	520.143	0.628571	1.57143	0.535448	Former	3840	active	No	No	20626.7	0.0951303	0
101864	Female	72	Other Race	College diploma	Living alone	1.8	medium	2	140	89.4	151.5	no	No	3.6	2.3	0.5	282	441.391	0.782609	1.56522	0.590099	Never	0	inactive	Yes	No	1743.9	0.471276	1
101865	Female	53	Non-Hispanic Non-Hispanic White	College diploma	Living alone	1.24	low	2	145	98.7	180	yes	No	2.1	2.8	0.4	278	208.5	0.3	0.75	0.548333	Current	1920	active	No	No	5332.74	0.386276	0
101880	Male	21	Other Race	College diploma	Married/living with partner	0.21	low	1	137	103.6	177.7	yes	No	2.6	1.7	0.5	248	379.294	0.764706	1.52941	0.583005	Never	46080	active	No	No	4099.94	0.440545	0
101882	Female	52	Non-Hispanic Non-Hispanic White	High school diploma	Living alone	1.18	low	2	146	90.6	162	yes	No	1.3	2.6	0.4	386	193	0.2	0.5	0.559259	Never	240	inactive	No	No	4767.8	0.214953	0
101885	Female	43	Non-Hispanic White	College diploma	Married/living with partner	1.81	medium	1	141	80.4	172.5	no	No	2.3	1.7	0.4	191	258.412	0.541176	1.35294	0.466087	Never	3360	active	No	No	5864.86	0.186173	0
101888	Male	60	Other Hispanic	High school diploma	Married/living with partner	3.69	high	1	137	104.3	163.6	yes	No	3.7	2.5	0.8	281	415.88	1.184	1.48	0.637531	Never	3840	active	No	No	2912	0.694688	0
101893	Male	23	Mexican American	High school diploma	Living alone	1.11	low	2	136	121.6	171.9	yes	No	7.9	2.1	0.8	311	1169.95	3.00952	3.7619	0.707388	Current	15840	active	Yes	No	7304.5	1.94837	0
101894	Female	46	Other Race	College diploma	Living alone	1.43	medium	2	140	88	168.3	yes	No	3.8	1.6	0.7	177	420.375	1.6625	2.375	0.522876	Current	160	inactive	No	No	1083.24	0.110372	0
101896	Female	28	Non-Hispanic White	High school diploma	Married/living with partner	1.42	medium	1	140	106.5	161.2	yes	No	4	2.6	0.4	263	404.615	0.615385	1.53846	0.66067	Never	2040	active	No	Yes	16373.4	0.390341	0
101910	Female	80	Non-Hispanic White	High school diploma	Living alone	1.78	medium	2	139	107.4	155.3	yes	No	5.1	2	0.5	196	499.8	1.275	2.55	0.691565	Never	16320	active	Yes	Yes	4191.06	0.275874	0
101912	Female	31	Other Race	College diploma	Married/living with partner	4.17	high	1	136	81	153.9	no	No	4.8	1.9	0.5	186	469.895	1.26316	2.52632	0.526316	Never	0	inactive	No	No	5673.56	0.122807	0
101917	Male	66	Other Hispanic	College diploma	Married/living with partner	2.2	medium	1	146	116	175.8	yes	No	2.9	3.7	0.6	179	140.297	0.47027	0.783784	0.659841	Former	2220	active	Yes	No	2214.42	0.851139	0
101920	Male	48	Other Race	College diploma	Married/living with partner	4.93	high	2	134	105.2	154.4	yes	No	3.2	1.9	0.7	230	387.368	1.17895	1.68421	0.681347	Never	0	inactive	Yes	No	2456.93	1.05433	0
101922	Male	55	Other Race	College diploma	Married/living with partner	0.48	low	2	136	80.9	164.3	yes	No	6.1	1.6	0.4	535	2039.69	1.525	3.8125	0.492392	Never	6720	active	No	No	1795.48	0.369087	0
101934	Female	64	Other Race	College diploma	Married/living with partner	3.65	high	2	140	111.5	167.9	yes	No	2.9	2	0.4	173	250.85	0.58	1.45	0.664086	Never	480	inactive	No	No	2317.12	1.84284	1
101950	Male	54	Non-Hispanic White	<High school diploma	Married/living with partner	0.87	low	1	135	118.5	173	yes	No	6	2.2	0.7	242	660	1.90909	2.72727	0.684971	Current	1440	active	No	No	6039.93	0.266903	1
101957	Female	35	Other Race	High school diploma	Married/living with partner	4.09	high	2	146	76	149.2	yes	No	2.2	1.6	0.3	167	229.625	0.4125	1.375	0.509383	Former	10560	active	No	No	3844.18	0.0909782	0
101966	Male	24	Other Hispanic	High school diploma	Living alone	1.3	medium	2	137	73.5	163.6	yes	No	2.9	3.2	0.4	246	222.938	0.3625	0.90625	0.449267	Current	10440	active	No	No	7788.05	0.335684	0
101989	Male	80	Mexican American	<High school diploma	Living alone	2.89	medium	2	136	105.9	161.5	yes	No	3.6	1.4	0.6	138	354.857	1.54286	2.57143	0.655728	Former	0	inactive	Yes	Yes	3755.53	0.117615	0
102008	Female	47	Non-Hispanic White	College diploma	Living alone	1.23	low	1	143	69.3	159.8	yes	No	3	1.6	0.3	165	309.375	0.5625	1.875	0.433667	Never	7520	active	No	No	18226.4	0.113999	0
102015	Female	20	Non-Hispanic White	High school diploma	Married/living with partner	1	low	2	141	89.3	160.8	yes	No	3.5	2.3	0.4	221	336.304	0.608696	1.52174	0.555348	Current	0	inactive	No	No	17513.5	0.330585	0
102030	Female	50	Mexican American	College diploma	Married/living with partner	1.41	medium	2	143	120.3	158.2	yes	No	4.8	1.5	0.4	229	732.8	1.28	3.2	0.76043	Current	0	inactive	Yes	Yes	6942.84	0.99858	0
102031	Female	61	Non-Hispanic White	College diploma	Living alone	3.49	medium	2	143	109.3	159.4	yes	No	3	1.9	0.4	307	484.737	0.631579	1.57895	0.685696	Former	14400	active	Yes	No	27051.4	0.175097	0
102035	Female	32	Non-Hispanic White	College diploma	Married/living with partner	0.33	low	2	136	94.7	170	yes	No	5.2	2	0.6	318	826.8	1.56	2.6	0.557059	Former	1680	active	No	No	8463.98	0.436213	1
102037	Female	21	Mexican American	High school diploma	Living alone	1.24	low	2	136	72.3	157.8	yes	No	4.7	2.1	0.8	220	492.381	1.79048	2.2381	0.458175	Never	0	inactive	No	No	14356.2	0.153415	0
102045	Male	55	Non-Hispanic White	College diploma	Married/living with partner	0.89	low	2	143	149.5	180.7	yes	No	2.2	2.4	0.7	198	181.5	0.641667	0.916667	0.827338	Current	11880	active	Yes	No	4245.16	0.816158	1
102047	Female	62	Other Hispanic	College diploma	Living alone	1.43	medium	2	135	103.7	164.1	yes	No	2.7	1.2	0.4	212	477	0.9	2.25	0.631932	Never	2880	active	Yes	No	2274	0.119721	1
102057	Male	70	Non-Hispanic White	<High school diploma	Married/living with partner	1.11	low	1	146	108.2	175.1	yes	No	5.3	2.1	0.7	215	542.619	1.76667	2.52381	0.617933	Current	1200	active	No	No	1387.86	0.794135	0
102060	Female	80	Non-Hispanic White	<High school diploma	Married/living with partner	1.91	medium	1	142	84.1	154.1	yes	No	4.2	1.3	0.6	192	620.308	1.93846	3.23077	0.54575	Never	0	inactive	Yes	No	6219.72	0.237768	0
102064	Female	35	Mexican American	College diploma	Married/living with partner	1.44	medium	2	135	92.3	156.3	yes	No	3.6	2	0.4	320	576	0.72	1.8	0.590531	Former	1080	active	No	No	7948.5	0.49329	0
102067	Male	55	Non-Hispanic White	<High school diploma	Living alone	0.58	low	2	146	100.9	175.8	yes	No	5.1	1.7	0.6	312	936	1.8	3	0.573948	Current	6720	active	Yes	Yes	15512.1	0.796681	1
102072	Female	50	Mexican American	<High school diploma	Married/living with partner	0.94	low	2	136	107.5	154.4	yes	No	4.1	2.2	0.5	256	477.091	0.931818	1.86364	0.696244	Never	0	inactive	No	Yes	2070.14	1.87478	1
102074	Female	35	Non-Hispanic Non-Hispanic White	College diploma	Living alone	0.28	low	1	138	107.1	160.3	yes	No	4.6	1.6	0.6	281	807.875	1.725	2.875	0.668122	Current	920	active	Yes	No	3659.22	0.158879	0
102078	Male	61	Non-Hispanic Non-Hispanic White	College diploma	Married/living with partner	0.98	low	1	147	90.3	176	yes	No	3	1.5	0.6	148	296	1.2	2	0.513068	Current	12000	active	No	No	1184.82	0.354824	0
102082	Male	58	Other Race	College diploma	Married/living with partner	1.64	medium	2	143	164.1	190.2	yes	No	6.3	1.2	0.5	180	945	2.625	5.25	0.862776	Never	1680	active	Yes	Yes	5918.95	1.03466	1
102093	Female	21	Other Hispanic	<High school diploma	Married/living with partner	0.12	low	2	146	95.5	155	yes	No	6.1	2	0.7	262	799.1	2.135	3.05	0.616129	Never	18720	active	No	No	5170.75	0.293101	0
102099	Female	32	Non-Hispanic White	High school diploma	Married/living with partner	1.91	medium	2	139	121.6	163.2	yes	No	4.4	1.5	0.3	273	800.8	0.88	2.93333	0.745098	Current	1920	active	No	Yes	1081.52	0.574565	0
102111	Male	53	Other Hispanic	College diploma	Married/living with partner	1.71	medium	1	139	100.7	176.9	yes	No	3	1.5	0.6	175	350	1.2	2	0.569248	Never	7200	active	No	No	7224.82	0.384579	0
102112	Female	33	Non-Hispanic Non-Hispanic White	College diploma	Living alone	2.36	medium	2	143	64.5	161.5	yes	No	4.6	3.8	0.6	247	299	0.726316	1.21053	0.399381	Current	4320	active	No	No	3050.9	0.206216	0
102116	Female	75	Non-Hispanic Non-Hispanic White	College diploma	Married/living with partner	5	high	1	136	91.8	163.5	yes	No	1.8	1	0.3	191	343.8	0.54	1.8	0.561468	Never	0	inactive	Yes	Yes	3115.12	0.177424	1
102128	Male	21	Non-Hispanic Non-Hispanic White	College diploma	Married/living with partner	2.13	medium	2	137	67.2	178.4	yes	No	2.8	1.6	0.4	266	465.5	0.7	1.75	0.376682	Former	35520	active	No	No	3961.32	0.0795217	0
102130	Male	56	Non-Hispanic White	College diploma	Living alone	4.15	high	1	139	105.6	167.7	yes	No	4	2.2	0.7	172	312.727	1.27273	1.81818	0.629696	Never	5760	active	Yes	No	45646.8	0.235794	0
102131	Male	69	Other Race	College diploma	Married/living with partner	0.88	low	2	136	92.1	163.9	yes	No	2.6	2	0.5	263	341.9	0.65	1.3	0.561928	Former	0	inactive	Yes	No	3319.18	0.685388	0
102135	Male	24	Non-Hispanic Non-Hispanic White	High school diploma	Living alone	1.43	medium	2	146	70.3	175.6	yes	No	3.4	1.8	0.5	200	377.778	0.944444	1.88889	0.400342	Never	840	active	No	No	5955.13	0.197352	0
102139	Male	31	Other Race	College diploma	Living alone	5	high	1	139	94.9	170.8	yes	No	2.8	2.1	0.5	265	353.333	0.666667	1.33333	0.555621	Never	840	active	No	No	2301.38	1.85623	0
102147	Female	55	Other Race	College diploma	Married/living with partner	2.15	medium	1	148	84.6	161.7	yes	No	3.2	1.7	0.4	215	404.706	0.752941	1.88235	0.523191	Never	576	inactive	Yes	Yes	2033.69	0.519228	0
102149	Female	27	Non-Hispanic Non-Hispanic White	<High school diploma	Living alone	0	low	2	145	113.6	158	yes	No	6.8	2	0.9	352	1196.8	3.06	3.4	0.718987	Never	0	inactive	No	No	5030.78	0.228278	0
102153	Female	77	Mexican American	College diploma	Living alone	2.22	medium	2	135	105.7	157.8	yes	No	4.4	1.8	0.5	191	466.889	1.22222	2.44444	0.669835	Never	8400	active	Yes	No	3042.04	0.614952	1
102181	Female	43	Non-Hispanic Non-Hispanic White	College diploma	Living alone	1.14	low	1	139	106.5	162.3	yes	No	0.9	1.9	0.6	155	73.4211	0.284211	0.473684	0.656192	Former	2800	active	Yes	No	7076.59	0.246997	1
102187	Male	20	Non-Hispanic Non-Hispanic White	<High school diploma	Living alone	1.69	medium	2	142	90.3	171.7	no	No	2	1.3	0.4	226	347.692	0.615385	1.53846	0.525917	Never	10200	active	No	No	4134.2	0.322073	0
102191	Male	58	Non-Hispanic White	College diploma	Married/living with partner	3.37	medium	2	139	118.6	179.3	no	No	4.8	1.5	0.9	271	867.2	2.88	3.2	0.661461	Never	480	inactive	No	No	3842.72	0.971566	0
102194	Female	36	Mexican American	College diploma	Married/living with partner	2.86	medium	2	142	119.8	155.3	no	No	3.2	1.8	0.4	271	481.778	0.711111	1.77778	0.77141	Never	640	active	No	No	8034.83	0.449782	0
102198	Female	63	Mexican American	High school diploma	Married/living with partner	4.62	high	1	135	117.8	155.4	yes	No	6.1	4.4	0.8	264	366	1.10909	1.38636	0.758044	Former	0	inactive	Yes	Yes	2957.36	1.15074	0
102201	Female	47	Non-Hispanic Non-Hispanic White	High school diploma	Living alone	0.6	low	2	144	79.5	172.4	yes	No	4.2	2	0.8	351	737.1	1.68	2.1	0.461137	Current	11520	active	No	No	2374.2	0.417946	0
102204	Female	49	Non-Hispanic White	High school diploma	Living alone	1.83	medium	1	142	103.3	170.9	yes	No	5.3	1.9	0.4	232	647.158	1.11579	2.78947	0.604447	Current	660	active	No	No	18601.6	3.23208	1
102210	Male	68	Non-Hispanic Non-Hispanic White	College diploma	Married/living with partner	1.37	medium	2	137	89.5	172.4	yes	No	2.2	1.2	0.4	200	366.667	0.733333	1.83333	0.519142	Never	1440	active	Yes	Yes	2925.27	0.227033	0
102211	Male	37	Mexican American	College diploma	Married/living with partner	2.99	medium	2	135	132.5	192.5	yes	No	4.4	1.4	0.4	202	634.857	1.25714	3.14286	0.688312	Never	7760	active	Yes	No	5020.2	0.335315	0
102217	Male	27	Non-Hispanic Non-Hispanic White	College diploma	Living alone	3.92	high	1	144	91.7	182.4	yes	No	2.5	2.6	0.6	222	213.462	0.576923	0.961538	0.502741	Never	5760	active	No	No	9567.71	0.460929	0
102218	Female	48	Non-Hispanic Non-Hispanic White	College diploma	Living alone	1.54	medium	1	138	91.4	165.7	yes	No	2.8	3	0.6	198	184.8	0.56	0.933333	0.551599	Current	0	inactive	Yes	No	2763.74	0.303012	0
102219	Male	54	Non-Hispanic Non-Hispanic White	College diploma	Living alone	2.22	medium	2	145	94.4	174.7	yes	No	5.2	1.5	0.6	180	624	2.08	3.46667	0.540355	Current	1200	active	No	No	3293.77	0.320777	0
102223	Female	36	Non-Hispanic White	College diploma	Married/living with partner	5	high	1	138	82.5	158	yes	No	2.8	2.5	0.3	223	249.76	0.336	1.12	0.522152	Never	2880	active	No	No	18301.7	0.410393	0
102225	Male	41	Non-Hispanic White	College diploma	Married/living with partner	5	high	2	140	102.3	192.5	yes	No	2.8	1.4	0.3	195	390	0.6	2	0.531429	Former	0	inactive	Yes	No	26050.8	0.51729	0
102226	Male	26	Other Race	College diploma	Living alone	4.93	high	2	134	91.5	185.1	yes	No	6.6	2.4	0.7	195	536.25	1.925	2.75	0.494327	Never	3600	active	No	No	9225.15	0.617669	0
102240	Male	60	Non-Hispanic White	High school diploma	Living alone	0	low	1	139	121.1	178.4	yes	No	4.1	1.4	0.6	217	635.5	1.75714	2.92857	0.678812	Current	960	active	Yes	No	36948.6	0.842093	0
102248	Male	48	Other Race	College diploma	Married/living with partner	3.38	medium	1	137	84.4	166.8	yes	No	2.5	1.2	0.4	230	479.167	0.833333	2.08333	0.505995	Current	5280	active	No	No	2564.33	0.438747	0
102250	Male	34	Non-Hispanic White	College diploma	Married/living with partner	5	high	2	141	91.3	177	yes	Yes	4.5	2.3	0.5	179	350.217	0.978261	1.95652	0.515819	Never	1200	active	Yes	No	20419	0.213549	0
102256	Male	40	Other Hispanic	<High school diploma	Married/living with partner	0.05	low	2	138	98.8	181.2	yes	No	3.5	1.8	0.5	241	468.611	0.972222	1.94444	0.545254	Never	240	inactive	Yes	No	8611.21	0.776367	0
102260	Female	65	Non-Hispanic White	College diploma	Married/living with partner	5	high	2	139	92.4	163.4	yes	No	4.5	1.6	0.4	240	675	1.125	2.8125	0.565483	Current	1200	active	No	No	15643.2	0.633609	0
102272	Female	26	Non-Hispanic White	College diploma	Married/living with partner	3.29	medium	2	140	84.2	169.6	yes	No	1.8	2.8	0.5	251	161.357	0.321429	0.642857	0.496462	Never	1920	active	No	No	4034.59	0.293487	0
102281	Female	54	Other Race	College diploma	Married/living with partner	5	high	1	148	93.2	151.9	yes	No	4.5	1.8	0.5	137	342.5	1.25	2.5	0.613562	Never	2960	active	Yes	Yes	3392.15	0.615393	0
102283	Female	22	Non-Hispanic White	College diploma	Married/living with partner	3.35	medium	2	146	103.3	158.5	yes	No	3.2	2.9	0.7	319	352	0.772414	1.10345	0.651735	Current	19200	active	No	No	2112.44	0.304518	0
102285	Male	37	Non-Hispanic Non-Hispanic White	College diploma	Living alone	1.62	medium	1	144	69.5	172.9	yes	No	1.6	1.8	0.4	185	164.444	0.355556	0.888889	0.401966	Never	0	inactive	No	No	4347.82	0.117925	0
102306	Male	71	Other Race	College diploma	Married/living with partner	1.7	medium	2	143	104.7	170.1	yes	No	7.9	1.9	0.8	188	781.684	3.32632	4.15789	0.61552	Current	5520	active	Yes	No	2748.14	0.864096	0
102309	Female	55	Non-Hispanic White	College diploma	Married/living with partner	4.74	high	2	138	116.6	157.3	yes	No	5.4	1.9	0.6	270	767.368	1.70526	2.84211	0.741259	Never	240	inactive	Yes	No	35430.8	0.379524	1
102336	Male	33	Non-Hispanic White	College diploma	Married/living with partner	5	high	1	144	93.1	174.7	yes	No	3.4	1.9	0.6	217	388.316	1.07368	1.78947	0.532914	Never	0	inactive	No	No	38995.4	0.316906	0
102338	Male	54	Non-Hispanic White	College diploma	Married/living with partner	4.74	high	2	138	110	195.6	yes	No	3.9	1.8	0.6	245	530.833	1.3	2.16667	0.562372	Never	3360	active	No	No	45123.4	0.420944	0
102341	Female	39	Non-Hispanic White	College diploma	Married/living with partner	4.06	high	2	145	104.4	167.3	yes	No	5.5	2.6	0.3	276	583.846	0.634615	2.11538	0.624029	Never	7440	active	No	No	31512.3	1.92697	0
102346	Female	37	Non-Hispanic White	<High school diploma	Living alone	0.09	low	2	147	144	169.5	yes	No	3.9	2.1	0.6	166	308.286	1.11429	1.85714	0.849558	Former	0	inactive	Yes	Yes	6379.82	8.23618	1
102350	Male	36	Mexican American	<High school diploma	Married/living with partner	1.37	medium	1	147	94.7	168.5	yes	No	3.3	1.3	0.3	188	477.231	0.761538	2.53846	0.562018	Never	10080	active	No	No	4207.26	0.416244	0
102352	Male	31	Non-Hispanic White	High school diploma	Married/living with partner	1	low	1	146	93.7	180.2	yes	No	5.8	2.4	0.6	276	667	1.45	2.41667	0.519978	Current	13200	active	No	No	8138.29	0.387531	0
102362	Male	80	Non-Hispanic White	College diploma	Married/living with partner	2.46	medium	1	146	111.2	179.3	yes	No	3.7	2.4	0.9	308	474.833	1.3875	1.54167	0.62019	Former	0	inactive	Yes	No	9372.11	0.942788	1
102368	Male	67	Non-Hispanic White	College diploma	Married/living with partner	5	high	2	147	111.1	178.4	yes	No	2	2.1	0.5	216	205.714	0.47619	0.952381	0.622758	Former	4800	active	Yes	No	26080.5	0.599585	1
102377	Female	59	Mexican American	High school diploma	Married/living with partner	1.44	medium	2	137	77.2	147.9	no	No	2.7	2.7	0.3	205	205	0.3	1	0.521974	Never	11040	active	Yes	No	2947.68	1.08997	0
102381	Male	42	Non-Hispanic White	College diploma	Married/living with partner	0.95	low	2	147	117.4	184.6	yes	No	3.1	1.5	0.4	196	405.067	0.826667	2.06667	0.63597	Former	9840	active	No	No	4547.37	1.80171	0
102383	Female	26	Mexican American	High school diploma	Living alone	0.58	low	2	144	80.3	150.4	no	No	1.9	2.2	0.3	313	270.318	0.259091	0.863636	0.53391	Never	0	inactive	No	No	5323.02	0.0933481	0
102392	Female	80	Non-Hispanic White	High school diploma	Married/living with partner	1.03	low	2	139	102	152.8	no	No	3.3	1.8	0.6	232	425.333	1.1	1.83333	0.667539	Never	0	inactive	Yes	Yes	3997.9	0.583302	1
102393	Female	20	Non-Hispanic White	College diploma	Living alone	0.41	low	1	139	71.7	171	yes	No	3.3	1.9	0.5	191	331.737	0.868421	1.73684	0.419298	Never	6960	active	No	No	13546.1	0.127847	0
102396	Male	45	Other Race	High school diploma	Living alone	0.94	low	1	135	112	180.3	yes	No	6.2	2.1	1	275	811.905	2.95238	2.95238	0.621187	Former	7120	active	Yes	No	6996.65	0.670336	0
102400	Male	42	Mexican American	High school diploma	Married/living with partner	2.02	medium	2	140	90.2	173.2	yes	No	3	1.9	0.6	186	293.684	0.947368	1.57895	0.520785	Never	4920	active	No	No	9686.7	0.0928886	0
102405	Male	49	Mexican American	High school diploma	Living alone	2.88	medium	2	136	112.7	185.5	yes	No	2.2	2	0.5	197	216.7	0.55	1.1	0.607547	Never	960	active	Yes	No	13779.9	0.512137	0
102411	Male	80	Non-Hispanic White	<High school diploma	Married/living with partner	5	high	2	143	100.1	169.9	yes	No	3.6	1.6	0.5	232	522	1.125	2.25	0.58917	Never	0	inactive	No	No	7167.5	0.276484	0
102415	Female	54	Other Hispanic	<High school diploma	Married/living with partner	1.08	low	2	136	110.3	153.4	yes	No	4	2.1	0.5	170	323.81	0.952381	1.90476	0.719035	Never	2160	active	Yes	Yes	1935.66	0.57425	0
102418	Male	63	Non-Hispanic White	College diploma	Married/living with partner	5	high	2	139	107	188.8	yes	No	2.7	1.4	0.5	241	464.786	0.964286	1.92857	0.566737	Never	3140	active	Yes	No	12583.4	0.422713	0
102424	Male	37	Other Race	College diploma	Living alone	5	high	1	137	84.5	176.4	yes	No	2.8	1	0.4	188	526.4	1.12	2.8	0.479025	Never	480	inactive	Yes	No	5326.76	0.173138	0
102428	Male	41	Non-Hispanic White	College diploma	Living alone	2.13	medium	2	141	139.1	182.5	yes	No	4.9	2.2	0.6	233	518.955	1.33636	2.22727	0.762192	Former	0	inactive	No	Yes	4916.4	1.33542	0
102443	Female	56	Non-Hispanic White	College diploma	Living alone	1.83	medium	2	134	70	153.3	yes	No	2.2	1.4	0.4	210	330	0.628571	1.57143	0.456621	Never	2520	active	No	No	7213.73	0.112775	0
102454	Female	34	Mexican American	High school diploma	Married/living with partner	2.52	medium	2	143	83.9	167.4	yes	No	3.1	1.7	0.6	248	452.235	1.09412	1.82353	0.501195	Never	13200	active	No	No	8713.78	0.203302	0
102455	Male	66	Non-Hispanic Non-Hispanic White	High school diploma	Married/living with partner	3.69	high	1	147	97.3	181.5	no	No	1.7	1	0.3	192	326.4	0.51	1.7	0.536088	Never	0	inactive	No	No	1853.49	0.430381	0
102456	Female	29	Other Race	High school diploma	Married/living with partner	1.8	medium	2	141	128.5	156.6	yes	No	8.6	3.6	0.5	459	1096.5	1.19444	2.38889	0.820562	Never	600	active	No	Yes	4025.7	0.987365	0
102457	Male	58	Non-Hispanic White	College diploma	Living alone	2.43	medium	2	144	97.3	172.1	yes	No	2.4	2.3	1	244	254.609	1.04348	1.04348	0.565369	Current	120	inactive	Yes	No	20044.2	0.737417	0
102458	Male	34	Non-Hispanic Non-Hispanic White	High school diploma	Living alone	1.11	low	1	144	73.9	172.8	yes	No	2	1.7	0.4	297	349.412	0.470588	1.17647	0.427662	Never	0	inactive	No	No	9321.04	0.83019	0
102461	Female	28	Other Race	College diploma	Married/living with partner	3.69	high	1	143	79.7	148.8	yes	No	3.7	2	0.4	242	447.7	0.74	1.85	0.535618	Never	1920	active	No	No	3522.61	0.220369	0
102466	Male	34	Non-Hispanic White	College diploma	Married/living with partner	5	high	2	134	88.2	195.8	yes	No	3.5	1.5	0.4	205	478.333	0.933333	2.33333	0.45046	Former	0	inactive	No	No	46960.3	0.188535	0
102475	Male	38	Mexican American	<High school diploma	Married/living with partner	0.49	low	2	148	95.2	157.7	yes	No	3.4	2	0.2	146	248.2	0.34	1.7	0.603678	Current	0	inactive	No	Yes	3972.82	7.20179	0
102489	Male	73	Non-Hispanic White	College diploma	Married/living with partner	5	high	1	138	118	178.4	yes	No	3.6	2.2	0.7	258	422.182	1.14545	1.63636	0.661435	Former	1200	active	No	Yes	13556.7	0.313221	0
102490	Female	71	Other Race	College diploma	Married/living with partner	2.22	medium	1	136	82	149.5	yes	No	3.4	2.5	0.5	316	429.76	0.68	1.36	0.548495	Never	960	active	Yes	No	3310.17	0.535402	0
102492	Male	31	Non-Hispanic Non-Hispanic White	College diploma	Living alone	5	high	1	144	100.4	182.7	yes	No	5.3	2.2	0.5	170	409.545	1.20455	2.40909	0.549535	Current	30240	active	No	No	3631.61	0.527299	0
102494	Male	76	Non-Hispanic White	High school diploma	Married/living with partner	5	high	1	138	101	175.5	yes	No	2.1	1.6	0.5	159	208.688	0.65625	1.3125	0.575499	Never	3120	active	No	No	10124	0.480711	0
102497	Male	75	Non-Hispanic White	High school diploma	Married/living with partner	3.04	medium	1	142	98.9	166.2	yes	No	7.7	3.9	1.9	535	1056.28	3.75128	1.97436	0.595066	Former	6720	active	Yes	No	8122.17	0.612722	0
102501	Male	45	Non-Hispanic White	College diploma	Married/living with partner	1.67	medium	2	141	122.9	173.4	yes	No	3.6	1.8	0.5	217	434	1	2	0.708766	Current	4920	active	No	Yes	4301.85	1.36733	0
102520	Male	63	Other Hispanic	College diploma	Married/living with partner	5	high	1	140	106.8	166.5	yes	No	5.4	1.8	0.6	248	744	1.8	3	0.641441	Former	4440	active	No	No	1783.29	1.64405	0
102522	Male	60	Mexican American	<High school diploma	Living alone	0.05	low	1	137	107	171.4	yes	No	4.2	2.1	0.4	271	542	0.8	2	0.624271	Current	320	inactive	Yes	Yes	1149.67	0.871034	1
102524	Male	63	Mexican American	<High school diploma	Married/living with partner	1.52	medium	1	135	106.5	170	yes	No	2.4	1.4	0.5	226	387.429	0.857143	1.71429	0.626471	Former	0	inactive	No	No	1770.74	1.21574	0
102526	Male	42	Non-Hispanic Non-Hispanic White	College diploma	Married/living with partner	3.03	medium	1	147	122.4	172.4	yes	No	5.1	1.4	0.4	197	717.643	1.45714	3.64286	0.709977	Never	19200	active	Yes	No	3115.72	0.354117	1
102544	Male	80	Non-Hispanic White	<High school diploma	Married/living with partner	1.46	medium	2	142	116.6	172.6	yes	No	4.1	1.6	0.4	138	353.625	1.025	2.5625	0.67555	Former	2880	active	No	No	2308.33	0.995841	0
102548	Female	28	Other Race	College diploma	Married/living with partner	1.2	low	1	141	104	164.7	yes	No	4	2.2	0.5	356	647.273	0.909091	1.81818	0.631451	Never	1920	active	No	No	6725.08	0.780116	0
102551	Female	58	Non-Hispanic Non-Hispanic White	College diploma	Living alone	0	low	1	145	112.1	168.4	yes	No	4.8	1.7	0.7	190	536.471	1.97647	2.82353	0.665677	Current	1620	active	Yes	No	2110.04	0.489195	0
102568	Male	23	Other Hispanic	College diploma	Living alone	0.41	low	2	141	78.5	179.8	no	No	3.7	3.4	0.6	265	288.382	0.652941	1.08824	0.436596	Never	19200	active	No	No	7591.06	0.0965463	0
102573	Male	54	Non-Hispanic Non-Hispanic White	College diploma	Living alone	5	high	2	147	101	172.2	yes	No	2.5	1.6	0.5	173	270.312	0.78125	1.5625	0.586527	Never	0	inactive	Yes	Yes	4389.61	0.284517	1
102574	Male	68	Mexican American	<High school diploma	Living alone	0.58	low	2	144	122.7	167.4	yes	No	4.7	2.1	0.5	372	832.571	1.11905	2.2381	0.732975	Former	0	inactive	Yes	Yes	842.846	0.863019	0
102581	Male	50	Non-Hispanic Non-Hispanic White	College diploma	Married/living with partner	5	high	1	144	74.7	168.2	yes	No	4.6	2.5	0.7	196	360.64	1.288	1.84	0.444114	Current	2640	active	No	No	4144.99	0.181944	1
102586	Male	52	Mexican American	<High school diploma	Married/living with partner	2	medium	2	148	96	163	yes	No	2.8	2	0.5	239	334.6	0.7	1.4	0.588957	Former	3920	active	No	No	6075.93	0.397787	0
102597	Female	70	Non-Hispanic White	<High school diploma	Married/living with partner	3.04	medium	2	139	116.8	161.1	yes	No	3.5	1.7	0.8	231	475.588	1.64706	2.05882	0.725016	Never	3360	active	Yes	No	1485	0.316207	0
102605	Female	57	Non-Hispanic Non-Hispanic White	College diploma	Married/living with partner	1.85	medium	1	138	113	167.3	yes	No	3.8	2.3	0.5	254	419.652	0.826087	1.65217	0.675433	Former	0	inactive	No	Yes	3507.42	0.22162	0
102606	Male	65	Non-Hispanic Non-Hispanic White	High school diploma	Living alone	2.82	medium	1	141	77.7	164.9	yes	No	2.5	1.3	0.5	207	398.077	0.961538	1.92308	0.471195	Current	1440	active	No	Yes	1614.46	0.0648192	0
102616	Female	56	Non-Hispanic White	College diploma	Living alone	4.41	high	1	134	78.7	159.5	yes	No	2.4	1.9	0.4	239	301.895	0.505263	1.26316	0.493417	Never	1920	active	No	No	32014.1	0.355897	1
102618	Female	70	Mexican American	<High school diploma	Living alone	0.64	low	1	148	86.8	152.8	yes	No	3.1	1.7	0.5	150	273.529	0.911765	1.82353	0.568063	Never	0	inactive	No	No	4013.95	0.349875	1
102621	Female	32	Non-Hispanic Non-Hispanic White	<High school diploma	Living alone	1.18	low	2	146	83.5	162.4	yes	No	3.1	2.3	0.5	264	355.826	0.673913	1.34783	0.514163	Current	0	inactive	No	No	3979.87	0.0997918	0
102622	Male	46	Non-Hispanic White	College diploma	Married/living with partner	1.82	medium	1	142	108.8	178.4	yes	No	6.1	2.4	0.8	253	643.042	2.03333	2.54167	0.609865	Current	36000	active	No	No	5447.72	0.566816	0
102634	Male	80	Non-Hispanic White	College diploma	Married/living with partner	4.43	high	1	144	118.9	177.9	yes	No	3.3	2.3	0.7	204	292.696	1.00435	1.43478	0.668353	Former	0	inactive	No	No	4588.92	1.16854	1
102635	Female	40	Other Race	College diploma	Married/living with partner	5	high	1	134	76.7	166.1	yes	No	2.6	2	0.4	160	208	0.52	1.3	0.46177	Never	3360	active	No	No	2294.9	0.112215	0
102642	Female	44	Other Race	College diploma	Married/living with partner	5	high	2	138	93.3	164.4	yes	No	5.4	2.8	0.6	391	754.071	1.15714	1.92857	0.567518	Never	1800	active	No	Yes	4493.25	0.570122	0
102644	Male	53	Non-Hispanic White	High school diploma	Married/living with partner	4.81	high	2	139	102.9	174.9	yes	No	3.3	1.9	0.6	213	369.947	1.04211	1.73684	0.588336	Former	9120	active	No	No	23758.2	0.977415	0
102651	Female	71	Non-Hispanic White	College diploma	Married/living with partner	5	high	1	139	104	154.7	yes	No	2	1.2	0.3	166	276.667	0.5	1.66667	0.672269	Never	2640	active	No	No	21915.9	0.243766	1
102653	Female	25	Other Hispanic	College diploma	Living alone	4.08	high	2	134	81.2	156.8	yes	No	5.7	1.8	0.6	258	817	1.9	3.16667	0.517857	Never	0	inactive	No	No	14358.3	0.169286	0
102664	Male	51	Other Race	<High school diploma	Married/living with partner	2.79	medium	2	134	104.9	168.1	no	No	3.7	2.7	0.8	207	283.667	1.0963	1.37037	0.624033	Never	5760	active	No	No	4377.89	0.323467	0
102674	Male	26	Non-Hispanic White	College diploma	Married/living with partner	2.46	medium	1	142	103.5	163.6	yes	No	3.7	2	0.6	264	488.4	1.11	1.85	0.632641	Former	18960	active	No	No	16570.2	0.629158	0
102676	Male	22	Other Race	High school diploma	Living alone	5	high	2	135	84.5	173.9	yes	No	5	3.7	0.8	409	552.703	1.08108	1.35135	0.485911	Never	4320	active	No	No	3634.97	0.938453	0
102680	Male	80	Non-Hispanic White	High school diploma	Married/living with partner	1.73	medium	2	146	95.6	182.9	yes	No	2.6	1.2	0.6	129	279.5	1.3	2.16667	0.52269	Never	28320	active	No	No	3345.9	0.19688	0
102688	Female	53	Non-Hispanic White	College diploma	Married/living with partner	0.86	low	1	142	106.7	169.4	yes	No	4.6	2	0.5	301	692.3	1.15	2.3	0.62987	Never	11520	active	Yes	No	4382.4	0.72943	0
102689	Male	24	Non-Hispanic White	College diploma	Married/living with partner	1.2	low	2	141	64	172.5	yes	No	2.9	1.4	0.3	263	544.786	0.621429	2.07143	0.371014	Former	0	inactive	No	No	7260.65	0.0742029	0
102701	Female	61	Non-Hispanic White	High school diploma	Living alone	3.05	medium	2	145	94.8	166.6	yes	No	4.1	1.5	0.5	171	467.4	1.36667	2.73333	0.569028	Never	13920	active	No	No	63033.8	0.215496	0
102702	Male	75	Non-Hispanic White	College diploma	Married/living with partner	1.97	medium	1	147	120.5	178.2	yes	No	4.2	1	0.5	190	798	2.1	4.2	0.676207	Former	1120	active	Yes	Yes	8884.59	0.777333	0
102713	Female	23	Non-Hispanic Non-Hispanic White	College diploma	Married/living with partner	0.37	low	1	147	80.9	171	yes	No	1.5	1.5	0.4	293	293	0.4	1	0.473099	Former	2560	active	No	No	3655.39	0.199333	0
102718	Male	20	Mexican American	<High school diploma	Married/living with partner	1.49	medium	2	136	103.3	159.4	yes	No	5.6	1.8	0.7	248	771.556	2.17778	3.11111	0.648055	Never	10560	active	Yes	No	3805.95	1.86721	0
102724	Male	43	Mexican American	<High school diploma	Living alone	2.47	medium	2	147	106.6	167.4	yes	No	3.8	2.6	0.6	362	529.077	0.876923	1.46154	0.636798	Former	5760	active	Yes	No	4150.04	0.740765	0
102726	Male	62	Non-Hispanic Non-Hispanic White	High school diploma	Married/living with partner	0.94	low	1	144	112.8	178.4	yes	No	5.2	2.1	0.5	139	344.19	1.2381	2.47619	0.632287	Current	0	inactive	Yes	No	1241.01	0.74653	0
102729	Female	61	Non-Hispanic White	College diploma	Married/living with partner	1.29	low	2	139	80.7	160.3	yes	No	3	0.8	0.4	225	843.75	1.5	3.75	0.503431	Never	0	inactive	Yes	No	11892	0.445433	1
102743	Male	45	Mexican American	High school diploma	Married/living with partner	0.83	low	1	147	106.9	169.8	yes	No	4.9	3.2	0.6	284	434.875	0.91875	1.53125	0.629564	Former	2240	active	No	Yes	9272.5	1.03542	0
102747	Female	57	Non-Hispanic White	College diploma	Living alone	1.71	medium	1	138	91	166.7	yes	No	2.6	3.1	0.7	172	144.258	0.587097	0.83871	0.545891	Former	1080	active	Yes	No	6083.61	0.164064	0
102759	Female	47	Non-Hispanic White	College diploma	Married/living with partner	5	high	2	140	86.4	178.9	yes	No	3.6	1.2	0.4	301	903	1.2	3	0.482951	Never	7200	active	No	No	18061.7	0.103701	0
102761	Male	25	Non-Hispanic Non-Hispanic White	College diploma	Living alone	1.43	medium	2	146	80.4	165.3	yes	No	2.4	2.4	0.5	196	196	0.5	1	0.486388	Former	0	inactive	No	No	5073.56	0.175695	0
102766	Female	46	Other Race	<High school diploma	Married/living with partner	0.88	low	2	144	74.5	150.8	yes	No	2.2	2	0.3	235	258.5	0.33	1.1	0.494032	Never	0	inactive	No	No	1936.27	0.315838	0
102775	Male	58	Non-Hispanic White	High school diploma	Living alone	0.61	low	2	135	140.2	176.3	yes	No	5.4	1.6	1.2	129	435.375	4.05	3.375	0.795235	Former	1440	active	Yes	Yes	4538.24	2.17568	0
102781	Male	24	Mexican American	<High school diploma	Living alone	5	high	2	135	78	182.9	yes	No	3.9	2.3	0.5	197	334.043	0.847826	1.69565	0.426463	Former	6720	active	No	No	1928.75	1.12359	0
102785	Female	54	Non-Hispanic White	College diploma	Married/living with partner	5	high	2	140	83.2	159.1	yes	No	3.7	2.6	0.6	272	387.077	0.853846	1.42308	0.522942	Never	240	inactive	No	No	30939.4	0.586416	1
102789	Male	61	Mexican American	<High school diploma	Married/living with partner	1.19	low	2	142	115.8	171	yes	No	3.3	2.2	0.6	150	225	0.9	1.5	0.677193	Former	0	inactive	No	No	869.997	0.494351	0
102790	Male	47	Non-Hispanic White	College diploma	Married/living with partner	3.03	medium	2	142	98.8	173.3	yes	No	3	2	0.5	152	228	0.75	1.5	0.57011	Never	1320	active	Yes	No	30145.5	1.17074	0
102800	Male	65	Non-Hispanic White	<High school diploma	Living alone	5	high	2	138	91.7	172	yes	No	3.3	1.5	0.6	180	396	1.32	2.2	0.53314	Former	960	active	No	Yes	15270.8	1.4959	0
102832	Male	29	Non-Hispanic White	High school diploma	Married/living with partner	0.65	low	2	135	86.2	173.9	yes	No	3.2	1.8	0.4	248	440.889	0.711111	1.77778	0.495687	Former	3600	active	No	No	20379.7	0.158694	0
102836	Male	40	Mexican American	<High school diploma	Married/living with partner	1.45	medium	1	137	109.6	165.1	yes	No	3.8	2.1	0.6	244	441.524	1.08571	1.80952	0.66384	Former	2400	active	Yes	Yes	8151.22	0.378206	0
102838	Male	41	Other Race	College diploma	Living alone	4.28	high	2	138	112.7	179.8	yes	No	2.5	1.6	0.4	184	287.5	0.625	1.5625	0.626808	Never	0	inactive	No	Yes	4168.44	0.661105	0
102845	Male	63	Non-Hispanic Non-Hispanic White	College diploma	Living alone	1.32	medium	2	145	91.6	170.9	yes	Yes	4.6	0.9	0.7	133	679.778	3.57778	5.11111	0.535986	Former	2420	active	Yes	No	1270.11	0.691481	0
102846	Female	61	Non-Hispanic White	High school diploma	Living alone	3.86	high	2	145	86	161	yes	No	2.8	1.5	0.5	292	545.067	0.933333	1.86667	0.534161	Never	0	inactive	Yes	No	39226.7	0.284486	0
102847	Female	30	Non-Hispanic White	College diploma	Living alone	0.15	low	2	139	87.4	155.6	yes	No	3.4	1.5	0.5	223	505.467	1.13333	2.26667	0.561697	Never	6480	active	Yes	No	4928.77	0.337533	0
102850	Male	54	Other Hispanic	College diploma	Married/living with partner	5	high	2	134	136.7	168.2	no	No	3.6	2.9	0.8	199	247.034	0.993103	1.24138	0.812723	Never	1420	active	Yes	No	10293.9	1.52953	1
102855	Male	61	Other Race	College diploma	Married/living with partner	4.93	high	2	148	96.4	169.7	yes	No	4.6	1.9	0.6	236	571.368	1.45263	2.42105	0.568061	Never	0	inactive	No	Yes	1562.4	0.590873	0
102865	Female	44	Non-Hispanic White	College diploma	Living alone	5	high	1	145	144.3	175	yes	No	4.4	2.5	0.5	209	367.84	0.88	1.76	0.824571	Former	6600	active	Yes	Yes	20272.6	1.71293	0
102866	Female	73	Non-Hispanic White	High school diploma	Living alone	5	high	2	145	110.3	164.6	yes	No	5	1.7	0.6	250	735.294	1.76471	2.94118	0.670109	Never	2160	active	Yes	Yes	21536.2	0.665642	0
102875	Male	61	Non-Hispanic White	High school diploma	Living alone	1.74	medium	1	139	96.8	170.2	yes	No	3.4	2.4	0.5	182	257.833	0.708333	1.41667	0.568743	Former	6000	active	Yes	Yes	3102.92	1.22804	0
102880	Female	51	Other Race	College diploma	Married/living with partner	5	high	2	138	83.7	152.4	yes	No	3.3	2.1	0.5	263	413.286	0.785714	1.57143	0.549213	Never	0	inactive	Yes	No	2847.82	0.409217	0
102885	Female	37	Non-Hispanic Non-Hispanic White	College diploma	Married/living with partner	2.79	medium	2	145	96.9	167.8	yes	No	5.9	2.4	0.8	294	722.75	1.96667	2.45833	0.577473	Never	10080	active	No	No	3544.83	0.189262	0
102889	Male	47	Mexican American	College diploma	Living alone	0.21	low	2	140	108.8	177.8	yes	No	5	2	0.7	198	495	1.75	2.5	0.611924	Never	2400	active	No	No	5095.37	0.592383	0
102893	Female	44	Non-Hispanic White	College diploma	Living alone	1.57	medium	1	145	95.4	164.6	yes	No	7.2	2.4	0.6	188	564	1.8	3	0.579587	Current	4080	active	No	No	13429.5	0.766765	0
102899	Female	20	Non-Hispanic White	College diploma	Living alone	1.68	medium	2	148	82.2	171.9	yes	No	3.1	2.2	0.3	254	357.909	0.422727	1.40909	0.478185	Never	2880	active	No	No	15336.3	0.266747	0
102901	Male	66	Non-Hispanic Non-Hispanic White	<High school diploma	Married/living with partner	2.46	medium	1	144	114.9	172.4	yes	No	2.4	1.6	0.5	208	312	0.75	1.5	0.666473	Never	0	inactive	Yes	Yes	2678.01	0.581118	1
102908	Male	51	Non-Hispanic White	High school diploma	Married/living with partner	2.24	medium	1	145	96	172.4	yes	No	3.6	2.6	0.5	223	308.769	0.692308	1.38462	0.556845	Current	2880	active	No	Yes	6117.66	1.08532	1
102918	Male	33	Non-Hispanic White	High school diploma	Married/living with partner	2.04	medium	2	143	80.4	169.3	yes	No	3.6	2.2	0.6	219	358.364	0.981818	1.63636	0.474897	Current	25920	active	No	No	5801.51	0.219499	0
102920	Female	62	Other Hispanic	College diploma	Married/living with partner	5	high	1	137	99.3	159.6	yes	No	3.4	1.9	0.5	258	461.684	0.894737	1.78947	0.62218	Former	0	inactive	Yes	No	4609.18	0.414787	1
102923	Female	43	Non-Hispanic White	High school diploma	Married/living with partner	0.95	low	1	139	128	173.9	yes	No	3.9	2.6	0.4	205	307.5	0.6	1.5	0.736055	Former	0	inactive	Yes	Yes	11121.6	1.34093	1
102934	Male	48	Non-Hispanic Non-Hispanic White	High school diploma	Married/living with partner	2.89	medium	2	147	96.7	178.5	yes	No	12.3	3	0.9	227	930.7	3.69	4.1	0.541737	Current	16800	active	No	No	2518.67	0.516518	0
102947	Male	75	Non-Hispanic Non-Hispanic White	College diploma	Living alone	4.28	high	2	137	94	170.4	yes	No	1.5	1.4	0.7	118	126.429	0.75	1.07143	0.551643	Former	720	active	Yes	No	2260.66	0.120386	0
102952	Female	70	Other Race	High school diploma	Married/living with partner	0.95	low	2	138	82.2	156.5	yes	No	2.9	1.8	0.4	161	259.389	0.644444	1.61111	0.52524	Never	2880	active	No	Yes	3056.45	0.298539	0
102954	Female	41	Non-Hispanic Non-Hispanic White	College diploma	Living alone	1.18	low	1	144	86.4	162.6	no	No	2	2.2	0.6	145	131.818	0.545455	0.909091	0.531365	Never	480	inactive	No	No	2949.13	0.209889	0
102956	Male	38	Non-Hispanic White	College diploma	Living alone	1.56	medium	1	142	122	175.8	yes	No	5.3	2.6	0.6	159	324.115	1.22308	2.03846	0.69397	Current	0	inactive	Yes	No	6571.05	2.39499	1
41479	Male	52	Mexican American	<High school diploma	Married/living with partner	2.2	medium	1	70	95.4	154.4	yes	No	2.3	2.4	0.3	176	168.667	0.2875	0.958333	0.617876	Never	6000	active	No	No	1539.01	0.566217	0
41485	Female	30	Other Hispanic	<High school diploma	Married/living with partner	1.01	low	2	71	89.7	157.9	no	No	5.8	2.1	0.7	465	1284.29	1.93333	2.7619	0.568081	Never	7920	active	No	No	3141.61	1.21232	0
41487	Male	27	Other Race	College diploma	Living alone	5	high	1	59	82.9	169.2	yes	No	2.7	2.1	0.7	258	331.714	0.9	1.28571	0.489953	Never	3900	active	Yes	No	14866.1	0.714514	0
41489	Female	40	Mexican American	High school diploma	Married/living with partner	2.15	medium	1	66	109.2	158.4	yes	No	4.7	2.8	0.5	330	553.929	0.839286	1.67857	0.689394	Never	0	inactive	No	No	4275.22	0.491193	0
41494	Male	40	Mexican American	High school diploma	Married/living with partner	1.3	medium	1	65	95.6	166.4	yes	No	3.3	2.4	0.6	259	356.125	0.825	1.375	0.574519	Current	24480	active	No	No	2491.8	0.600891	0
41498	Male	68	Non-Hispanic Non-Hispanic White	<High school diploma	Married/living with partner	1.63	medium	1	72	95.5	165.8	no	No	3.9	1.7	0.5	281	644.647	1.14706	2.29412	0.575995	Never	0	inactive	Yes	No	1412.51	0.378646	0
41501	Male	70	Non-Hispanic White	<High school diploma	Living alone	4.6	high	1	59	132	177.9	no	No	4.5	1.8	0.6	280	700	1.5	2.5	0.74199	Former	720	active	Yes	Yes	5178.56	1.12794	0
41502	Male	29	Mexican American	High school diploma	Married/living with partner	3.41	medium	2	71	95.4	168.2	yes	No	4.3	2.5	0.6	249	428.28	1.032	1.72	0.567182	Current	5280	active	No	No	4762.62	0.564374	0
41511	Male	35	Mexican American	College diploma	Married/living with partner	5	high	1	65	93.5	173.6	yes	No	4.8	1.9	0.5	247	624	1.26316	2.52632	0.538594	Current	11760	active	No	Yes	3751.75	3.2232	0
41518	Male	50	Non-Hispanic White	College diploma	Married/living with partner	5	high	2	60	101.9	178.7	yes	No	2.6	1.9	0.3	191	261.368	0.410526	1.36842	0.570229	Never	6480	active	No	No	14941.6	0.562596	0
41522	Male	72	Non-Hispanic White	College diploma	Married/living with partner	1.21	low	2	72	107	174.9	yes	No	3.3	1.7	0.5	215	417.353	0.970588	1.94118	0.611778	Never	800	active	Yes	Yes	1807.87	1.14901	0
41524	Female	80	Non-Hispanic White	College diploma	Married/living with partner	2.19	medium	1	69	85.1	157.1	yes	No	3	3	0.5	341	341	0.5	1	0.541693	Former	720	active	No	Yes	7066.68	0.26908	0
41525	Male	51	Non-Hispanic Non-Hispanic White	High school diploma	Married/living with partner	2.84	medium	2	68	87.5	170.6	no	No	2.6	2.9	0.6	211	189.172	0.537931	0.896552	0.512896	Former	1680	active	No	No	3314.9	1.30264	0
41541	Female	43	Non-Hispanic White	College diploma	Married/living with partner	4.72	high	2	63	115.8	175.3	yes	No	3.6	3.7	0.8	446	433.946	0.778378	0.972973	0.660582	Never	0	inactive	Yes	No	16539.5	0.452004	0
41542	Female	60	Non-Hispanic Non-Hispanic White	High school diploma	Married/living with partner	1.16	low	1	59	118.8	163.9	no	No	5.1	2.4	0.6	349	741.625	1.275	2.125	0.724832	Never	0	inactive	Yes	Yes	1753.43	0.687924	0
41547	Male	49	Non-Hispanic White	College diploma	Married/living with partner	4.24	high	1	60	118.6	188.9	yes	No	1.4	1.1	0.3	140	178.182	0.381818	1.27273	0.627845	Never	16080	active	Yes	No	15576	0.969316	0
41549	Female	61	Non-Hispanic Non-Hispanic White	High school diploma	Living alone	0.29	low	2	65	124.7	175.3	yes	No	3.9	1.6	0.4	340	828.75	0.975	2.4375	0.711352	Never	5280	active	Yes	No	3141.51	0.620103	0
41550	Male	45	Mexican American	High school diploma	Living alone	0.47	low	2	61	91.1	172.5	yes	No	2.5	1.9	0.4	301	396.053	0.526316	1.31579	0.528116	Former	13920	active	No	No	3988.1	0.567075	0
41567	Male	51	Other Hispanic	College diploma	Married/living with partner	2.92	medium	1	68	100.2	176	yes	No	6.1	2.5	0.6	246	600.24	1.464	2.44	0.569318	Current	1120	active	No	No	2241.68	3.32194	0
41587	Female	44	Non-Hispanic Non-Hispanic White	College diploma	Living alone	0.86	low	2	68	92.3	171.1	yes	No	1.8	1.9	0.3	230	217.895	0.284211	0.947368	0.539451	Never	0	inactive	No	No	4599.77	0.161601	0
41590	Male	25	Mexican American	College diploma	Married/living with partner	2.33	medium	1	66	90.8	183.9	yes	Yes	5.5	2.2	0.6	296	740	1.5	2.5	0.493747	Never	240	inactive	No	No	6163.75	0.408822	0
41607	Female	46	Non-Hispanic White	High school diploma	Married/living with partner	5	high	2	64	96.2	164.1	yes	No	5.5	1.2	0.5	277	1269.58	2.29167	4.58333	0.586228	Former	1440	active	No	Yes	14270.1	0.365493	0
41612	Female	80	Non-Hispanic White	<High school diploma	Married/living with partner	2.14	medium	2	60	107.3	154.4	no	No	4.3	3.8	0.9	264	298.737	1.01842	1.13158	0.694948	Never	0	inactive	No	Yes	6862.45	1.33122	0
41613	Male	71	Non-Hispanic Non-Hispanic White	College diploma	Married/living with partner	5	high	2	70	116.1	185.7	yes	No	3.4	1.9	0.5	220	393.684	0.894737	1.78947	0.625202	Former	0	inactive	No	Yes	1074.91	0.656772	0
41616	Female	67	Non-Hispanic Non-Hispanic White	<High school diploma	Living alone	1.11	low	2	67	100.2	152.3	yes	No	1.6	2.1	0.6	271	206.476	0.457143	0.761905	0.657912	Former	240	inactive	Yes	No	2302.1	0.499366	1
41624	Female	68	Other Hispanic	<High school diploma	Married/living with partner	2.71	medium	2	66	97.8	157.3	yes	No	5.6	2.3	0.7	167	406.609	1.70435	2.43478	0.621742	Never	1920	active	Yes	Yes	1279.07	1.50344	0
41625	Female	26	Mexican American	<High school diploma	Living alone	0.4	low	1	66	106	157.8	no	No	5.9	3.6	0.8	336	550.667	1.31111	1.63889	0.671736	Never	12000	active	No	No	3726.61	2.47736	0
41626	Male	24	Other Hispanic	College diploma	Living alone	4.44	high	2	68	87.8	174.7	yes	No	3.2	1.7	0.4	199	374.588	0.752941	1.88235	0.502576	Current	4800	active	No	No	3438.62	0.765162	0
41628	Female	23	Non-Hispanic White	College diploma	Living alone	0.79	low	2	59	88.7	173.4	yes	No	5.6	1.5	0.3	228	851.2	1.12	3.73333	0.511534	Former	5920	active	No	No	8650.86	0.680919	0
41639	Male	37	Mexican American	College diploma	Living alone	2.21	medium	1	66	93.1	171.1	yes	No	4.4	2	0.7	450	990	1.54	2.2	0.544126	Never	0	inactive	No	No	7019.82	0.119028	0
41674	Male	25	Non-Hispanic Non-Hispanic White	College diploma	Married/living with partner	2.69	medium	2	74	84.2	179.8	no	No	2.1	2.3	0.3	244	222.783	0.273913	0.913043	0.468298	Never	2880	active	No	No	4073.09	0.267069	0
41675	Female	71	Non-Hispanic White	High school diploma	Living alone	1.15	low	2	59	94.2	158.2	yes	No	6.7	1.5	0.6	292	1304.27	2.68	4.46667	0.595449	Current	0	inactive	No	Yes	3878.67	1.10397	1
41685	Male	25	Non-Hispanic White	High school diploma	Living alone	0.94	low	1	61	71.1	170.8	no	No	4.4	2.3	0.7	273	522.261	1.33913	1.91304	0.416276	Never	1920	active	No	No	7390.42	0.227111	0
41691	Male	60	Non-Hispanic White	High school diploma	Married/living with partner	5	high	2	63	113.2	176.3	yes	No	2.8	2	0.6	251	351.4	0.84	1.4	0.642087	Never	4080	active	Yes	No	8656.66	0.810549	1
41693	Male	50	Non-Hispanic Non-Hispanic White	College diploma	Living alone	5	high	1	74	124.4	190.4	yes	No	3	2.2	0.3	219	298.636	0.409091	1.36364	0.653361	Current	36960	active	Yes	No	3285.75	0.692696	0
41700	Male	55	Non-Hispanic White	<High school diploma	Married/living with partner	1.28	low	1	67	103.3	173.4	yes	No	7.5	1.5	0.7	285	1425	3.5	5	0.595732	Current	1920	active	Yes	No	3753.51	0.512721	0
41702	Female	55	Non-Hispanic Non-Hispanic White	High school diploma	Living alone	3.43	medium	1	59	135.5	165.7	no	No	4.8	2.3	0.5	296	617.739	1.04348	2.08696	0.817743	Never	0	inactive	Yes	Yes	3806.2	1.02837	0
41721	Male	37	Non-Hispanic White	<High school diploma	Married/living with partner	0.84	low	1	64	96.8	178.2	no	No	3.8	1.3	0.5	287	838.923	1.46154	2.92308	0.54321	Current	6720	active	No	No	3827.25	0.966235	0
41724	Male	27	Non-Hispanic Non-Hispanic White	College diploma	Living alone	1.63	medium	2	68	106.5	189.3	no	No	2.5	2.3	0.4	334	363.043	0.434783	1.08696	0.562599	Never	880	active	No	No	4109.23	0.354631	0
41725	Female	77	Non-Hispanic White	High school diploma	Living alone	1.05	low	1	66	86.7	164	no	No	3.1	1.1	0.6	308	868	1.69091	2.81818	0.528659	Never	3840	active	Yes	No	5513.33	1.43667	1
41728	Female	47	Non-Hispanic White	College diploma	Married/living with partner	5	high	2	65	69.3	167.9	no	No	2.3	1.1	0.5	236	493.455	1.04545	2.09091	0.412746	Never	4200	active	No	No	24578.8	0.0796255	0
41733	Male	38	Non-Hispanic White	High school diploma	Living alone	5	high	1	61	107.4	172	yes	No	2.7	1.3	0.5	199	413.308	1.03846	2.07692	0.624419	Never	12960	active	Yes	Yes	12737.2	2.18826	0
41737	Female	28	Non-Hispanic Non-Hispanic White	<High school diploma	Living alone	3.79	high	1	69	93.8	175.3	yes	No	4.8	2.6	0.5	270	498.462	0.923077	1.84615	0.535083	Never	320	inactive	No	No	5867.37	0.203437	0
41739	Male	69	Non-Hispanic Non-Hispanic White	<High school diploma	Living alone	0.99	low	1	72	114.6	184.5	yes	No	3.7	1.2	0.7	170	524.167	2.15833	3.08333	0.621138	Never	0	inactive	Yes	Yes	1396.76	0.359212	0
41764	Male	54	Non-Hispanic White	College diploma	Married/living with partner	4.84	high	1	60	91.8	169.9	yes	No	1.7	1.3	0.5	219	286.385	0.653846	1.30769	0.540318	Former	960	active	Yes	No	10653.8	0.504918	0
41772	Male	69	Other Hispanic	<High school diploma	Married/living with partner	2.86	medium	2	61	94.5	169.2	yes	No	2.4	1.5	0.5	137	219.2	0.8	1.6	0.558511	Former	1680	active	No	No	1497.73	0.577753	0
41776	Female	48	Mexican American	College diploma	Married/living with partner	1.64	medium	2	71	86.1	158.9	yes	No	3.7	2.4	0.5	310	477.917	0.770833	1.54167	0.54185	Never	0	inactive	No	No	3615.72	0.5618	0
41793	Male	43	Non-Hispanic White	High school diploma	Living alone	1.18	low	1	65	143.4	191.2	no	No	4.2	2.2	0.6	207	395.182	1.14545	1.90909	0.75	Never	5700	active	Yes	No	4651.15	0.471835	0
41802	Female	30	Non-Hispanic White	High school diploma	Married/living with partner	2.82	medium	2	60	86.9	155.4	yes	No	4	1.8	0.5	248	551.111	1.11111	2.22222	0.559202	Never	2400	active	No	No	12803.8	0.244318	0
41808	Female	68	Non-Hispanic White	High school diploma	Married/living with partner	3.65	high	1	60	87.1	161.3	no	No	3.9	1.5	0.5	386	1003.6	1.3	2.6	0.539988	Never	0	inactive	No	No	10007.6	0.316077	0
41809	Male	35	Mexican American	High school diploma	Married/living with partner	1.09	low	2	70	139.8	185.9	yes	No	5.2	2.4	0.8	327	708.5	1.73333	2.16667	0.752017	Current	0	inactive	Yes	No	5686.92	1.27373	0
41811	Female	36	Mexican American	College diploma	Married/living with partner	3.2	medium	1	66	84.5	162.9	yes	No	3.3	1.8	0.6	242	443.667	1.1	1.83333	0.518723	Never	0	inactive	No	No	4400.62	0.374004	0
41825	Female	63	Non-Hispanic Non-Hispanic White	College diploma	Living alone	2.06	medium	1	63	79.9	158.2	yes	No	6.3	2	0.6	427	1345.05	1.89	3.15	0.505057	Current	6300	active	Yes	No	1721.9	0.211804	0
41839	Female	43	Mexican American	<High school diploma	Living alone	0.63	low	2	70	90	154.4	no	No	5.1	1.5	0.6	238	809.2	2.04	3.4	0.582902	Never	800	active	No	No	3522.93	0.397591	0
41855	Male	21	Non-Hispanic White	College diploma	Living alone	0.38	low	2	67	84	173.7	yes	No	3.5	2.2	0.7	281	447.045	1.11364	1.59091	0.483592	Never	12720	active	No	No	7749.79	0.266267	0
41857	Female	30	Non-Hispanic White	College diploma	Married/living with partner	4.84	high	2	62	94.6	171.4	yes	No	5.1	2.4	0.5	261	554.625	1.0625	2.125	0.551925	Current	1800	active	No	No	13354.3	0.43806	0
41863	Female	48	Non-Hispanic Non-Hispanic White	High school diploma	Living alone	3.22	medium	2	65	96.5	165.4	yes	No	3	2.2	0.5	319	435	0.681818	1.36364	0.583434	Former	0	inactive	No	No	6331.9	0.57708	0
41878	Female	46	Non-Hispanic White	High school diploma	Living alone	1.19	low	2	60	87.7	160.8	yes	No	4.8	2.3	0.5	424	884.87	1.04348	2.08696	0.545398	Current	3840	active	No	No	4998.87	0.689687	0
41881	Male	70	Non-Hispanic White	High school diploma	Married/living with partner	5	high	2	60	107	168.2	yes	No	2.7	1.6	0.6	205	345.938	1.0125	1.6875	0.636147	Former	3360	active	Yes	No	6719.17	0.498238	0
41883	Female	42	Other Hispanic	College diploma	Living alone	2.84	medium	2	69	130.2	147.7	no	No	6.7	2.5	0.8	329	881.72	2.144	2.68	0.881517	Never	0	inactive	No	No	2428.88	1.76391	0
41907	Female	23	Other Hispanic	<High school diploma	Married/living with partner	0.66	low	2	61	88.4	151.5	yes	No	4.8	2.9	0.5	256	423.724	0.827586	1.65517	0.583498	Current	3360	active	No	No	4243.91	0.369747	0
41919	Female	53	Mexican American	College diploma	Married/living with partner	4.09	high	1	66	71	151.5	yes	No	2.8	1.9	0.3	308	453.895	0.442105	1.47368	0.468647	Never	0	inactive	No	No	2794.25	0.238614	0
41922	Female	33	Non-Hispanic White	College diploma	Married/living with partner	5	high	2	63	77.6	163.9	yes	No	4.1	2.1	0.6	246	480.286	1.17143	1.95238	0.473459	Never	2080	active	No	No	12648.9	0.244119	0
41927	Male	38	Non-Hispanic White	College diploma	Married/living with partner	3.57	high	2	62	76	171.5	yes	No	2.3	1	0.3	248	570.4	0.69	2.3	0.443149	Never	1920	active	No	No	11345.2	0.112634	0
41962	Male	48	Non-Hispanic White	High school diploma	Married/living with partner	5	high	1	63	106.3	187	yes	No	4.4	2	0.7	233	512.6	1.54	2.2	0.568449	Never	5760	active	Yes	No	15066.2	1.13331	0
41963	Male	66	Mexican American	<High school diploma	Married/living with partner	0.06	low	1	66	91.5	161.9	yes	No	4.2	1.3	0.4	228	736.615	1.29231	3.23077	0.565164	Former	0	inactive	Yes	No	1444.77	0.182467	0
41964	Male	42	Non-Hispanic White	College diploma	Living alone	1.96	medium	1	69	122	178.5	yes	No	4	1.8	0.5	157	348.889	1.11111	2.22222	0.683473	Former	0	inactive	No	No	6140.34	1.42054	0
41968	Male	26	Non-Hispanic White	<High school diploma	Married/living with partner	0.77	low	2	59	70.9	163.6	yes	No	10.3	4.2	1	271	664.595	2.45238	2.45238	0.433374	Current	32880	active	No	No	6218.17	2.9691	0
41988	Female	52	Non-Hispanic White	<High school diploma	Married/living with partner	0.97	low	2	64	77.7	160.5	yes	No	3.6	2.1	0.4	168	288	0.685714	1.71429	0.484112	Current	1200	active	No	No	4753.74	0.631222	0
41990	Male	45	Mexican American	<High school diploma	Living alone	1.99	medium	2	65	109.7	160.4	yes	No	2.9	2.1	0.4	176	243.048	0.552381	1.38095	0.683915	Former	17280	active	No	No	5071.65	1.68874	0
41998	Male	20	Non-Hispanic Non-Hispanic White	High school diploma	Living alone	1.24	low	1	63	82.4	174.8	yes	No	3.2	2.6	0.5	364	448	0.615385	1.23077	0.471396	Current	1200	active	No	No	4231.23	0.944716	0
42000	Male	51	Non-Hispanic White	College diploma	Married/living with partner	5	high	1	68	86	173.8	no	No	2.6	2	0.6	240	312	0.78	1.3	0.494822	Former	2820	active	Yes	No	14855	0.707595	0
42001	Male	22	Non-Hispanic White	High school diploma	Living alone	3.69	high	2	62	96.7	187	yes	No	2.6	1.5	0.3	165	286	0.52	1.73333	0.517112	Never	0	inactive	No	No	15305.9	1.37975	0
42004	Male	52	Mexican American	High school diploma	Married/living with partner	5	high	1	71	106	163	yes	No	3	1.8	0.4	255	425	0.666667	1.66667	0.650307	Never	1200	active	Yes	Yes	2793.26	14.6499	0
42028	Male	45	Non-Hispanic Non-Hispanic White	High school diploma	Living alone	3.38	medium	2	72	76.8	181.4	no	No	2.4	2.6	0.5	167	154.154	0.461538	0.923077	0.423374	Never	3360	active	Yes	No	5159.17	0.199629	0
42045	Male	53	Non-Hispanic White	College diploma	Living alone	5	high	1	69	97.9	185.3	yes	No	2.8	2.3	0.6	201	244.696	0.730435	1.21739	0.528332	Former	720	active	No	No	17957	0.667907	0
42050	Male	52	Non-Hispanic White	College diploma	Living alone	5	high	1	71	90.6	167.7	no	No	2.2	1.8	0.5	286	349.556	0.611111	1.22222	0.54025	Never	8640	active	No	Yes	18241.3	0.638942	0
42053	Female	38	Mexican American	College diploma	Married/living with partner	5	high	2	65	80.7	161.4	no	No	2.4	1.5	0.4	271	433.6	0.64	1.6	0.5	Never	2160	active	No	No	5318.83	0.08125	0
42056	Female	57	Non-Hispanic White	College diploma	Married/living with partner	1.29	low	2	64	109.3	163.7	yes	No	2.4	1.8	0.3	233	310.667	0.4	1.33333	0.667685	Former	240	inactive	No	No	4753.74	1.5767	0
42058	Female	33	Non-Hispanic White	College diploma	Living alone	0.74	low	2	59	141.9	175.8	yes	No	7.8	3.2	0.7	357	870.188	1.70625	2.4375	0.807167	Former	1680	active	No	No	5988.61	0.955279	0
42069	Female	36	Non-Hispanic White	College diploma	Married/living with partner	0.91	low	1	59	80.4	162.1	yes	No	3.9	1.7	0.4	233	534.529	0.917647	2.29412	0.49599	Current	0	inactive	No	No	5160.8	0.442223	0
42073	Male	42	Mexican American	<High school diploma	Married/living with partner	1.93	medium	2	71	99.7	167.7	yes	No	4.6	2.2	0.7	352	736	1.46364	2.09091	0.594514	Never	640	active	No	No	3547.92	0.13107	0
42079	Male	80	Non-Hispanic White	College diploma	Married/living with partner	3.65	high	1	65	91	175.8	yes	No	0.5	2.4	2.5	66	13.75	0.520833	0.208333	0.517634	Former	2880	active	Yes	No	3456.51	0.745392	0
42083	Male	34	Non-Hispanic Non-Hispanic White	High school diploma	Living alone	1.47	medium	1	68	97	167.9	yes	No	6.9	2.1	0.8	258	847.714	2.62857	3.28571	0.577725	Former	80	inactive	No	No	3870.44	0.240478	0
42085	Female	57	Non-Hispanic White	<High school diploma	Living alone	0.43	low	2	71	70.6	165.7	yes	No	2.6	2.4	0.6	401	434.417	0.65	1.08333	0.426071	Current	3120	active	No	No	5427.04	0.159392	0
42087	Female	32	Non-Hispanic Non-Hispanic White	College diploma	Living alone	3.37	medium	2	67	132.8	171.4	no	No	4.9	2.4	0.3	359	732.958	0.6125	2.04167	0.774796	Never	1440	active	Yes	No	5228.65	0.261494	0
42091	Male	22	Non-Hispanic White	High school diploma	Married/living with partner	3.18	medium	2	62	74.5	172.1	no	No	2.4	1.6	0.8	193	289.5	1.2	1.5	0.432888	Never	12540	active	No	No	13969.6	0.284985	0
42103	Female	67	Non-Hispanic Non-Hispanic White	High school diploma	Married/living with partner	3.07	medium	1	63	102.8	165.7	no	No	2.4	1.4	0.5	239	409.714	0.857143	1.71429	0.620398	Former	480	inactive	Yes	Yes	1714.48	0.261131	0
42109	Female	29	Other Race	College diploma	Married/living with partner	3.57	high	2	62	74.4	169.6	yes	No	2.4	1.7	0.5	214	302.118	0.705882	1.41176	0.438679	Never	2880	active	No	No	14143.8	0.0923535	0
42118	Female	23	Non-Hispanic White	<High school diploma	Married/living with partner	2.5	medium	2	62	79.8	157.8	no	No	2.8	1.4	0.2	195	390	0.4	2	0.505703	Never	4320	active	No	No	16932	0.0462665	0
42119	Female	38	Non-Hispanic White	<High school diploma	Living alone	0.46	low	1	61	121.6	161	yes	No	6.1	1.9	0.7	255	818.684	2.24737	3.21053	0.75528	Current	0	inactive	No	No	6085.98	1.38329	0
42123	Male	61	Other Hispanic	College diploma	Married/living with partner	1.25	low	1	71	94.3	170.2	yes	No	5.3	2	0.4	302	800.3	1.06	2.65	0.554054	Never	13440	active	Yes	Yes	1288.97	0.575054	0
42132	Female	37	Non-Hispanic White	College diploma	Living alone	1.08	low	2	72	121.2	157	yes	No	4.9	2.4	0.5	226	461.417	1.02083	2.04167	0.771975	Never	0	inactive	No	No	14643.2	1.0107	0
42134	Female	27	Mexican American	High school diploma	Married/living with partner	1.31	medium	1	64	70.4	141	yes	No	5.3	1.4	0.3	195	738.214	1.13571	3.78571	0.499291	Never	6320	active	No	No	3018.19	0.2651	0
42135	Male	50	Non-Hispanic White	<High school diploma	Living alone	2.88	medium	1	64	91.7	176.5	no	No	3	2.3	0.4	238	310.435	0.521739	1.30435	0.519547	Former	4680	active	Yes	Yes	4119.57	1.04958	0
42144	Female	51	Mexican American	<High school diploma	Living alone	0.58	low	1	71	91	152.5	yes	No	5.4	3.9	0.5	368	509.538	0.692308	1.38462	0.596721	Current	1200	active	No	No	2636.73	5.53416	1
42157	Female	67	Non-Hispanic White	College diploma	Living alone	5	high	1	61	98.3	159.4	no	No	2.8	2.4	0.5	274	319.667	0.583333	1.16667	0.616688	Never	1680	active	No	No	10203.3	0.419422	0
42173	Male	50	Other Race	College diploma	Married/living with partner	5	high	2	66	101.5	184.3	yes	No	2.6	1.9	0.6	224	306.526	0.821053	1.36842	0.550733	Never	1440	active	No	No	17265.8	0.550281	0
42177	Female	34	Mexican American	College diploma	Married/living with partner	3.69	high	2	72	107.5	158	no	No	3.3	1.8	0.4	233	427.167	0.733333	1.83333	0.68038	Never	1120	active	No	No	3563.61	1.09025	0
42179	Male	30	Non-Hispanic White	College diploma	Married/living with partner	1.26	low	1	61	131	175.2	no	No	3.9	2.2	0.8	213	377.591	1.41818	1.77273	0.747717	Current	1280	active	Yes	No	4014.29	0.988176	0
42183	Female	41	Non-Hispanic White	High school diploma	Living alone	4.38	high	1	63	100.2	169.8	yes	No	7.8	2.9	1	399	1073.17	2.68966	2.68966	0.590106	Current	3840	active	No	No	13572.8	0.490456	0
42187	Female	52	Non-Hispanic Non-Hispanic White	High school diploma	Living alone	1.96	medium	1	64	89.5	169	yes	No	3.1	3.7	0.6	327	273.973	0.502703	0.837838	0.529586	Current	0	inactive	No	No	3704.07	0.652994	0
42189	Male	50	Mexican American	<High school diploma	Married/living with partner	1.41	medium	1	69	93.1	160.2	no	No	2.7	1.5	0.5	224	403.2	0.9	1.8	0.581149	Never	12960	active	No	Yes	2379.69	1.01156	0
42198	Female	26	Mexican American	College diploma	Married/living with partner	2.28	medium	1	66	107.9	161.2	yes	No	8.4	2.3	0.7	363	1325.74	2.55652	3.65217	0.669355	Never	4320	active	No	No	4473.29	1.05394	0
42202	Female	30	Non-Hispanic White	College diploma	Married/living with partner	5	high	1	69	67.6	168.9	yes	No	3.3	2.4	0.4	211	290.125	0.55	1.375	0.400237	Never	2160	active	No	No	16517.3	0.0808208	0
42224	Male	23	Non-Hispanic White	College diploma	Living alone	0.58	low	2	68	83.2	177.1	yes	No	2.4	2.1	0.6	204	233.143	0.685714	1.14286	0.469791	Never	6000	active	No	No	13700.8	1.67577	0
42238	Male	30	Non-Hispanic White	College diploma	Married/living with partner	3.52	high	2	61	81.2	170.2	yes	No	1.9	1.6	0.4	197	233.938	0.475	1.1875	0.477086	Never	4680	active	No	Yes	14953.4	0.275526	0
42239	Male	58	Non-Hispanic White	College diploma	Married/living with partner	5	high	2	61	100.7	162.5	yes	No	3	1.6	0.7	299	560.625	1.3125	1.875	0.619692	Never	3040	active	No	No	20306	0.689061	0
42252	Female	21	Non-Hispanic Non-Hispanic White	College diploma	Living alone	1.16	low	1	59	108.5	166.8	yes	No	6.6	2.1	0.9	211	663.143	2.82857	3.14286	0.65048	Former	960	active	No	No	4382.82	0.556104	0
42268	Male	31	Non-Hispanic White	High school diploma	Married/living with partner	1.41	medium	2	64	100	173.8	yes	No	5	1.7	0.5	216	635.294	1.47059	2.94118	0.575374	Former	8400	active	No	No	3491.92	0.421015	0
42281	Female	24	Mexican American	College diploma	Married/living with partner	5	high	2	72	80.1	166.2	yes	No	2.4	2.1	0.3	236	269.714	0.342857	1.14286	0.481949	Never	1800	active	No	No	3527.18	0.232845	0
42284	Female	51	Mexican American	<High school diploma	Married/living with partner	3.4	medium	2	65	86.8	159	yes	No	2.2	2.2	0.4	228	228	0.4	1	0.545912	Current	11520	active	No	No	3121.66	0.300109	0
42285	Female	61	Other Hispanic	College diploma	Living alone	1.66	medium	1	72	93.2	158.8	yes	No	3	2	0.4	260	390	0.6	1.5	0.586902	Never	480	inactive	No	No	1134.39	0.322945	0
42287	Female	66	Non-Hispanic Non-Hispanic White	College diploma	Living alone	2.6	medium	1	74	93.4	165	yes	No	3.9	1.4	0.4	223	621.214	1.11429	2.78571	0.566061	Current	5400	active	No	Yes	1723.31	0.448805	1
42291	Female	70	Non-Hispanic White	College diploma	Married/living with partner	4.64	high	2	66	125.5	163	no	No	6.3	2	0.7	269	847.35	2.205	3.15	0.769939	Never	2520	active	No	No	7297.24	1.16435	0
42294	Male	63	Mexican American	College diploma	Living alone	1.71	medium	2	72	85.7	169.1	yes	No	2.6	1.7	0.5	237	362.471	0.764706	1.52941	0.506801	Former	0	inactive	No	No	1286.94	0.332145	0
42308	Female	23	Non-Hispanic Non-Hispanic White	High school diploma	Living alone	1.39	medium	2	64	73.6	158.9	no	No	3.2	1.5	0.4	339	723.2	0.853333	2.13333	0.463184	Never	0	inactive	No	No	4799.9	0.259682	0
42315	Female	33	Non-Hispanic White	College diploma	Married/living with partner	1.84	medium	1	67	74.3	153.5	yes	No	4.5	2.1	0.4	177	379.286	0.857143	2.14286	0.484039	Current	9600	active	No	No	5348.23	0.473929	0
42318	Male	38	Non-Hispanic White	High school diploma	Living alone	0.93	low	1	61	79.8	177.2	yes	No	6.5	1.8	0.8	267	964.167	2.88889	3.61111	0.450339	Current	16360	active	No	Yes	3467.01	0.24459	0
42342	Male	80	Non-Hispanic White	College diploma	Married/living with partner	2.23	medium	1	69	110	172.7	no	No	3.4	2	0.5	234	397.8	0.85	1.7	0.636943	Former	10080	active	Yes	No	4693.74	1.13268	1
42346	Male	54	Non-Hispanic White	High school diploma	Living alone	5	high	2	62	110.9	167.6	no	No	6.7	2.4	0.9	227	633.708	2.5125	2.79167	0.661695	Never	1440	active	Yes	Yes	12938.4	0.296051	0
42357	Female	25	Non-Hispanic White	College diploma	Married/living with partner	4.38	high	1	59	72	145.8	no	No	2.4	1.5	0.3	461	737.6	0.48	1.6	0.493827	Never	3120	active	No	No	15098.3	0.211596	0
42365	Female	58	Non-Hispanic White	College diploma	Married/living with partner	3.86	high	2	72	109	154.4	no	No	2.4	2.5	0.5	260	249.6	0.48	0.96	0.705959	Never	2880	active	No	No	18724.9	0.567997	0
42368	Male	60	Other Hispanic	<High school diploma	Married/living with partner	1.67	medium	1	70	90.8	149.5	no	No	3.5	2.1	0.4	229	381.667	0.666667	1.66667	0.607358	Former	15360	active	No	Yes	689.208	1.87445	0
42369	Female	80	Non-Hispanic Non-Hispanic White	<High school diploma	Living alone	0.75	low	1	59	101.8	164.2	yes	No	2	1.7	0.5	173	203.529	0.588235	1.17647	0.619976	Never	0	inactive	Yes	No	2171.26	0.345784	0
42376	Female	21	Other Race	High school diploma	Living alone	0.52	low	1	68	73.8	158.8	yes	No	5.2	1.3	0.5	220	880	2	4	0.464736	Never	13440	active	No	No	10366.3	0.22524	0
42377	Male	36	Non-Hispanic White	High school diploma	Married/living with partner	5	high	2	67	105.7	176.5	yes	No	3	1.2	0.3	282	705	0.75	2.5	0.598867	Former	0	inactive	No	No	13252.6	0.473105	0
42379	Female	62	Other Hispanic	College diploma	Married/living with partner	1.23	low	2	68	84.5	148.5	no	No	2	2.8	0.4	197	140.714	0.285714	0.714286	0.569024	Never	2280	active	No	No	919.016	1.02269	0
42381	Male	24	Non-Hispanic White	<High school diploma	Living alone	0.46	low	1	61	89.3	169.6	yes	No	5.4	2.2	1.2	260	638.182	2.94545	2.45455	0.526533	Current	720	active	No	No	7390.42	1.07401	0
42382	Female	46	Non-Hispanic White	High school diploma	Married/living with partner	3.69	high	2	62	83	178.3	yes	No	3.9	1.7	0.3	345	791.471	0.688235	2.29412	0.465508	Never	1680	active	No	No	13388.4	0.375399	0
42383	Male	23	Non-Hispanic White	College diploma	Living alone	0.48	low	2	68	81.2	170.7	yes	No	3.3	2.4	0.7	250	343.75	0.9625	1.375	0.475688	Never	9240	active	No	No	6695.21	0.248523	0
42391	Male	25	Non-Hispanic Non-Hispanic White	High school diploma	Living alone	0.85	low	2	61	79.8	183	yes	No	1.9	1.9	0.5	308	308	0.5	1	0.436066	Current	24660	active	No	No	5618	0.313067	0
42393	Male	37	Non-Hispanic White	High school diploma	Married/living with partner	1.84	medium	1	67	104	178.2	yes	No	2.8	2.4	0.5	253	295.167	0.583333	1.16667	0.583614	Former	0	inactive	No	Yes	3519.98	1.3723	0
42402	Female	61	Mexican American	College diploma	Married/living with partner	2.5	medium	2	72	80.2	153.5	no	No	4.2	1.8	0.4	266	620.667	0.933333	2.33333	0.522476	Never	0	inactive	Yes	No	1130.46	0.327215	1
42415	Male	37	Non-Hispanic White	High school diploma	Married/living with partner	4.84	high	2	62	119.9	176.9	yes	No	6.2	3.4	0.6	295	537.941	1.09412	1.82353	0.677784	Current	21600	active	No	No	12469.1	1.43132	0
42421	Male	55	Mexican American	High school diploma	Married/living with partner	1.83	medium	1	65	105.4	166.1	no	No	3.9	2.8	0.6	287	399.75	0.835714	1.39286	0.634557	Never	0	inactive	Yes	Yes	4921.08	1.40689	0
42422	Male	51	Mexican American	<High school diploma	Living alone	2.26	medium	2	74	91.6	164	yes	No	7	2.1	0.7	205	683.333	2.33333	3.33333	0.558537	Former	12420	active	Yes	Yes	1781.59	2.2149	0
42429	Male	29	Other Hispanic	High school diploma	Married/living with partner	3.29	medium	1	72	93.1	173.1	yes	No	3.9	2.1	0.6	275	510.714	1.11429	1.85714	0.537839	Never	1920	active	Yes	No	8724.97	0.872553	0
42432	Female	23	Mexican American	<High school diploma	Married/living with partner	1.14	low	2	69	112.5	149.2	no	No	7.6	2.9	0.5	331	867.448	1.31034	2.62069	0.754021	Never	840	active	No	Yes	2426.41	1.25168	0
42435	Male	34	Mexican American	<High school diploma	Married/living with partner	1.18	low	1	71	83.7	179.9	yes	No	2.7	2.2	0.6	273	335.045	0.736364	1.22727	0.465258	Current	13320	active	Yes	No	6369.28	0.322079	0
42446	Male	21	Mexican American	<High school diploma	Living alone	0.31	low	2	65	89.4	167.1	yes	No	2	2.8	0.7	265	189.286	0.5	0.714286	0.535009	Never	0	inactive	No	No	5529.51	0.38271	0
42449	Male	80	Non-Hispanic White	<High school diploma	Living alone	0.69	low	1	59	98.5	178.3	yes	No	3.2	1.7	0.6	209	393.412	1.12941	1.88235	0.55244	Former	8400	active	Yes	No	2154.09	0.293551	0
42453	Male	74	Non-Hispanic White	<High school diploma	Married/living with partner	1.06	low	2	63	117.7	174.8	yes	No	2.6	2	0.5	212	275.6	0.65	1.3	0.673341	Former	5040	active	Yes	Yes	1554.22	1.94081	0
42467	Female	27	Non-Hispanic White	College diploma	Married/living with partner	5	high	1	73	83.2	159.5	yes	No	2.5	2.1	0.3	249	296.429	0.357143	1.19048	0.52163	Never	1440	active	No	No	14553	0.455241	0
42471	Male	50	Non-Hispanic White	College diploma	Married/living with partner	5	high	1	63	99.8	170.4	yes	No	2.9	1.4	0.6	218	451.571	1.24286	2.07143	0.585681	Never	1200	active	Yes	No	14529.2	0.632954	0
42475	Male	27	Non-Hispanic White	College diploma	Living alone	0.69	low	1	69	75.3	181.8	no	No	2	1.5	0.5	197	262.667	0.666667	1.33333	0.414191	Never	36960	active	No	No	5251.16	0.226336	0
42479	Female	55	Non-Hispanic Non-Hispanic White	High school diploma	Living alone	3.09	medium	1	72	127.1	163.3	yes	No	4.5	1.7	0.2	350	926.471	0.529412	2.64706	0.778322	Never	4800	active	Yes	Yes	3651.66	0.626881	0
42482	Female	35	Non-Hispanic Non-Hispanic White	High school diploma	Living alone	0.47	low	1	64	107.7	166.2	yes	No	4.4	4.2	0.7	315	330	0.733333	1.04762	0.648014	Current	720	active	Yes	Yes	4367.24	0.590181	0
42483	Male	59	Mexican American	College diploma	Married/living with partner	4.38	high	1	71	93	165	yes	No	4.8	1.9	0.9	250	631.579	2.27368	2.52632	0.563636	Former	17280	active	Yes	No	2793.26	0.54597	0
42493	Male	57	Non-Hispanic White	College diploma	Living alone	5	high	1	60	100	192.8	yes	No	5.5	1.6	0.5	195	670.312	1.71875	3.4375	0.518672	Current	7200	active	No	No	13746.2	0.433997	0
42503	Male	39	Mexican American	College diploma	Married/living with partner	5	high	2	67	107	187.5	yes	No	5	1.8	0.6	229	636.111	1.66667	2.77778	0.570667	Never	6000	active	No	No	5638.29	1.01462	0
42516	Male	25	Non-Hispanic White	College diploma	Living alone	4.41	high	1	65	86.1	177.7	yes	No	6	2.1	0.8	340	971.429	2.28571	2.85714	0.484524	Current	36000	active	No	Yes	13671	0.0865633	0
42529	Male	71	Non-Hispanic White	<High school diploma	Living alone	2.5	medium	2	62	138.5	180.2	yes	No	4.6	1	0.5	262	1205.2	2.3	4.6	0.76859	Current	0	inactive	No	Yes	4638.04	0.877544	0
42539	Male	50	Non-Hispanic White	College diploma	Married/living with partner	5	high	2	68	95.2	167	yes	No	2.6	2.4	0.5	229	248.083	0.541667	1.08333	0.57006	Never	1200	active	No	No	13242.2	0.46515	0
42541	Female	72	Mexican American	<High school diploma	Living alone	3.82	high	2	65	122.8	154	yes	No	4.3	1.7	0.3	355	897.941	0.758824	2.52941	0.797403	Never	0	inactive	Yes	Yes	2188.51	0.465088	1
42542	Female	39	Non-Hispanic Non-Hispanic White	College diploma	Living alone	1.63	medium	1	61	102.6	164.9	yes	No	1.3	3.4	0.6	333	127.324	0.229412	0.382353	0.622195	Never	0	inactive	Yes	No	4640.45	3.23412	1
42554	Female	20	Non-Hispanic Non-Hispanic White	College diploma	Living alone	5	high	1	63	106.6	160.9	yes	No	3.1	1.5	0.4	341	704.733	0.826667	2.06667	0.662523	Never	0	inactive	No	No	4781.81	0.540658	0
42568	Male	42	Other Hispanic	College diploma	Married/living with partner	2.12	medium	2	61	109	164.8	yes	No	3.3	1.9	0.6	184	319.579	1.04211	1.73684	0.661408	Never	8640	active	Yes	Yes	3988.1	0.867888	0
42592	Female	53	Mexican American	High school diploma	Married/living with partner	2.04	medium	1	66	92.8	143.3	yes	No	3.3	3.2	0.4	233	240.281	0.4125	1.03125	0.647592	Current	0	inactive	No	No	2869.73	0.932177	0
42596	Female	59	Other Hispanic	<High school diploma	Living alone	1.47	medium	2	72	101.5	151.4	no	No	5.2	2.8	0.6	264	490.286	1.11429	1.85714	0.67041	Never	0	inactive	No	No	2136.25	0.995347	0
42604	Female	43	Non-Hispanic White	College diploma	Married/living with partner	3.57	high	2	70	88.8	156.6	yes	No	3	1.5	0.3	345	690	0.6	2	0.56705	Former	3840	active	No	No	18246.5	0.215322	0
42612	Male	36	Other Hispanic	<High school diploma	Living alone	1.25	low	2	68	97.9	175	no	No	3.9	2.9	0.5	226	303.931	0.672414	1.34483	0.559429	Never	28800	active	No	Yes	4748.63	0.902137	0
42617	Male	71	Other Race	College diploma	Married/living with partner	3.21	medium	2	67	93.2	175.3	no	No	2.5	2.2	0.7	198	225	0.795455	1.13636	0.53166	Never	2880	active	No	No	5756.55	0.690656	0
42626	Female	55	Non-Hispanic Non-Hispanic White	<High school diploma	Married/living with partner	4.29	high	2	68	120.8	160.9	yes	No	3.1	2.5	0.4	294	364.56	0.496	1.24	0.750777	Former	360	inactive	Yes	No	3841.7	0.174374	1
42634	Female	22	Non-Hispanic Non-Hispanic White	High school diploma	Living alone	0.32	low	1	68	95.2	163.2	yes	No	3.3	1.8	0.4	252	462	0.733333	1.83333	0.583333	Current	10080	active	No	No	4932.78	0.433033	0
42636	Male	55	Other Hispanic	College diploma	Married/living with partner	5	high	2	71	119	172.7	yes	No	3.5	1.5	0.4	223	520.333	0.933333	2.33333	0.689056	Never	0	inactive	Yes	No	2195.73	1.421	0
42640	Female	79	Non-Hispanic White	College diploma	Living alone	1.57	medium	1	60	87.8	151.6	yes	No	1	1.1	0.5	41	37.2727	0.454545	0.909091	0.579156	Never	0	inactive	No	No	5830.78	0.399786	0
42647	Male	48	Mexican American	College diploma	Married/living with partner	5	high	2	65	89.2	168.4	yes	No	3.6	1.8	0.5	186	372	1	2	0.529691	Never	480	inactive	No	No	5192.3	1.76137	0
42648	Male	44	Non-Hispanic White	<High school diploma	Married/living with partner	0.58	low	1	60	91.6	179.6	yes	No	2.6	2.5	0.7	232	241.28	0.728	1.04	0.510022	Never	20160	active	No	No	12071.9	0.923333	0
42652	Male	49	Non-Hispanic White	<High school diploma	Married/living with partner	3.92	high	2	67	109	168.7	yes	No	3.6	1.8	0.5	248	496	1	2	0.646117	Former	24720	active	Yes	No	17816	1.42334	0
42656	Female	55	Mexican American	High school diploma	Married/living with partner	5	high	2	71	108.5	157.1	no	No	5.7	1.8	0.6	279	883.5	1.9	3.16667	0.690643	Never	3360	active	Yes	No	2211.42	1.71119	0
42659	Male	40	Mexican American	<High school diploma	Married/living with partner	1.94	medium	1	69	99.8	170.9	yes	No	2.7	1.7	0.4	221	351	0.635294	1.58824	0.583967	Never	14880	active	No	No	4045.37	0.81252	0
42668	Female	65	Non-Hispanic White	High school diploma	Married/living with partner	5	high	2	63	82.7	161.8	yes	No	2	1.8	0.4	222	246.667	0.444444	1.11111	0.511125	Never	1680	active	Yes	Yes	10364.5	1.35801	0
42679	Female	37	Other Hispanic	High school diploma	Married/living with partner	0.6	low	2	61	110.8	164.7	yes	No	3.7	2.3	0.4	250	402.174	0.643478	1.6087	0.672738	Current	0	inactive	Yes	No	3976.15	1.01274	1
42680	Female	39	Mexican American	<High school diploma	Married/living with partner	0.7	low	1	71	89.8	154.4	yes	No	3.3	1.4	0.4	282	664.714	0.942857	2.35714	0.581606	Never	7200	active	No	No	4043.32	0.466305	0
42681	Male	59	Non-Hispanic Non-Hispanic White	High school diploma	Living alone	0	low	2	67	103.8	176.3	yes	No	3	1.6	0.8	292	547.5	1.5	1.875	0.588769	Never	21600	active	Yes	No	4270.29	0.332276	0
42685	Male	23	Non-Hispanic Non-Hispanic White	College diploma	Living alone	1.54	medium	2	67	105.8	182.4	yes	No	2.7	3.4	0.5	257	204.088	0.397059	0.794118	0.580044	Current	2760	active	No	No	5293.55	1.47126	0
42687	Female	46	Non-Hispanic Non-Hispanic White	College diploma	Married/living with partner	4.8	high	1	68	79.9	166.5	yes	No	2.2	1.6	0.4	357	490.875	0.55	1.375	0.47988	Never	4320	active	No	No	4739.92	0.194603	0
42692	Female	63	Mexican American	<High school diploma	Married/living with partner	1.83	medium	1	65	111.5	158.3	yes	No	3.4	2.2	0.6	238	367.818	0.927273	1.54545	0.704359	Never	480	inactive	No	No	2263.06	0.705847	0
42693	Male	49	Non-Hispanic White	College diploma	Married/living with partner	5	high	1	60	88.2	173.7	yes	No	3.7	1.8	0.6	252	518	1.23333	2.05556	0.507772	Never	3040	active	No	No	15576	0.429855	0
42701	Female	25	Other Hispanic	College diploma	Living alone	0.69	low	1	68	73.7	169.4	yes	No	5.2	2.3	0.9	221	499.652	2.03478	2.26087	0.435065	Never	3360	active	No	No	3305.26	0.168784	0
42702	Female	70	Non-Hispanic White	High school diploma	Living alone	1.1	low	1	67	107.9	153.8	yes	No	3.2	2.1	0.5	269	409.905	0.761905	1.52381	0.70156	Current	0	inactive	Yes	No	3463.92	0.372246	0
42704	Male	45	Mexican American	<High school diploma	Married/living with partner	2.18	medium	1	65	93	170	no	No	3.1	1.4	0.5	283	626.643	1.10714	2.21429	0.547059	Never	0	inactive	No	No	3067.94	0.437647	0
42710	Male	29	Non-Hispanic White	College diploma	Living alone	4.33	high	2	71	99.5	181	yes	No	4.1	1.6	0.5	222	568.875	1.28125	2.5625	0.549724	Never	13920	active	No	No	15828.8	1.71209	0
42712	Female	63	Non-Hispanic Non-Hispanic White	College diploma	Married/living with partner	5	high	1	59	86.6	159.7	no	No	0.9	1.9	0.3	249	117.947	0.142105	0.473684	0.542267	Never	5040	active	No	No	1851.94	0.314153	0
42713	Female	39	Non-Hispanic Non-Hispanic White	College diploma	Married/living with partner	5	high	1	59	114.8	168.3	no	No	5.1	2.9	0.3	439	772.034	0.527586	1.75862	0.682115	Never	28800	active	No	No	4362.94	0.361785	0
42738	Male	75	Mexican American	High school diploma	Living alone	0.73	low	1	66	92.4	162	no	No	3.4	2.2	0.6	197	304.455	0.927273	1.54545	0.57037	Never	3720	active	No	No	1744.1	1.28261	0
42740	Male	73	Non-Hispanic White	College diploma	Married/living with partner	2.14	medium	2	62	105.5	180.1	yes	No	6.1	2.6	0.9	243	570.115	2.11154	2.34615	0.585786	Never	1920	active	Yes	No	6126.85	1.63303	0
42745	Female	51	Mexican American	College diploma	Married/living with partner	2.68	medium	1	66	120.5	161.1	no	No	2.5	1.7	0.4	231	339.706	0.588235	1.47059	0.747983	Never	0	inactive	Yes	Yes	2826.24	0.613844	0
42763	Male	46	Non-Hispanic Non-Hispanic White	<High school diploma	Married/living with partner	3.49	medium	1	67	75.5	173.1	yes	No	7	3.2	0.9	273	597.188	1.96875	2.1875	0.436164	Current	0	inactive	Yes	No	3391.33	0.198517	0
42764	Female	68	Non-Hispanic Non-Hispanic White	<High school diploma	Living alone	0.71	low	2	64	81	161.7	yes	No	4.8	2	0.5	293	703.2	1.2	2.4	0.500928	Current	720	active	Yes	No	1871.68	0.150904	1
42768	Male	80	Non-Hispanic White	<High school diploma	Living alone	1.92	medium	2	62	140.2	164.2	yes	No	5.4	1.9	1.1	142	403.579	3.12632	2.84211	0.853837	Never	0	inactive	No	No	4013.45	1.21784	0
42785	Female	22	Other Hispanic	College diploma	Married/living with partner	1.86	medium	1	69	95	153.5	yes	No	8.3	4	0.6	349	724.175	1.245	2.075	0.618893	Current	3360	active	No	No	3930.45	1.19244	0
42787	Female	35	Non-Hispanic White	College diploma	Living alone	1.86	medium	1	71	84.8	163.3	yes	No	5.3	2.2	0.4	312	751.636	0.963636	2.40909	0.51929	Never	4800	active	No	No	17272.3	0.492671	0
42797	Female	35	Non-Hispanic White	College diploma	Married/living with partner	1.61	medium	2	60	88.7	166.7	yes	No	3.4	1.5	0.3	208	471.467	0.68	2.26667	0.532094	Never	3000	active	No	No	6296.51	0.180797	0
42801	Female	50	Non-Hispanic White	High school diploma	Married/living with partner	2.14	medium	2	63	98.6	171.6	no	No	9.5	2.1	0.6	311	1406.9	2.71429	4.52381	0.574592	Current	0	inactive	No	No	16059.4	0.810958	0
42802	Male	62	Mexican American	High school diploma	Married/living with partner	4.55	high	2	70	124.4	174.6	yes	No	4.2	2.1	0.3	178	356	0.6	2	0.712486	Never	600	active	Yes	No	1215.95	0.659762	0
42813	Male	80	Non-Hispanic White	College diploma	Married/living with partner	1.79	medium	2	62	94.7	158.2	no	No	4.1	0.6	0.4	217	1482.83	2.73333	6.83333	0.598609	Never	2400	active	Yes	No	2174.15	0.201106	0
42816	Female	31	Non-Hispanic White	High school diploma	Married/living with partner	0.84	low	1	64	90.9	158.1	yes	No	5.3	2	0.5	229	606.85	1.325	2.65	0.574953	Current	7200	active	No	No	6008.18	0.712271	0
42817	Male	51	Mexican American	High school diploma	Married/living with partner	3.71	high	2	71	107.2	186.5	no	No	3.8	2.2	0.7	228	393.818	1.20909	1.72727	0.574799	Former	0	inactive	Yes	Yes	2195.73	1.04265	0
42822	Male	39	Non-Hispanic White	College diploma	Married/living with partner	0.77	low	1	64	104.7	172.7	no	Yes	3.4	2	0.4	215	365.5	0.68	1.7	0.606254	Former	4800	active	No	No	4490.48	1.29609	0
42827	Female	69	Mexican American	College diploma	Married/living with partner	5	high	2	70	110	170.7	yes	No	3.3	2.5	0.4	272	359.04	0.528	1.32	0.644405	Never	2680	active	No	No	1800.48	0.594918	0
42834	Male	45	Non-Hispanic White	College diploma	Married/living with partner	4.83	high	2	63	126.5	188.4	yes	No	4.3	1.9	0.5	246	556.737	1.13158	2.26316	0.671444	Never	320	inactive	No	No	19885.6	1.0517	0
42838	Female	54	Other Race	High school diploma	Married/living with partner	1.29	low	2	59	98	162.6	yes	No	7.3	3.1	1.1	177	416.806	2.59032	2.35484	0.602706	Current	480	inactive	No	No	5191.93	1.55075	0
42840	Female	45	Other Hispanic	College diploma	Married/living with partner	1.75	medium	1	60	96.3	147.4	yes	No	2.6	2.5	0.5	323	335.92	0.52	1.04	0.653324	Current	7200	active	No	No	3008.53	0.547247	0
42842	Male	25	Mexican American	<High school diploma	Married/living with partner	1.14	low	2	69	105.7	162.1	yes	No	4.5	2.3	0.7	186	363.913	1.36957	1.95652	0.652067	Former	400	inactive	No	Yes	3259	3.11786	0
42843	Male	56	Non-Hispanic Non-Hispanic White	<High school diploma	Living alone	1.41	medium	1	61	100.6	173.4	yes	No	2.6	1.2	0.4	266	576.333	0.866667	2.16667	0.580161	Current	240	inactive	Yes	No	3665.9	0.569151	0
42850	Male	53	Non-Hispanic White	<High school diploma	Married/living with partner	4.5	high	2	59	98.7	176.4	no	No	6.2	1.8	0.6	342	1178	2.06667	3.44444	0.559524	Current	2880	active	No	Yes	4734.9	0.527184	0
42857	Male	28	Mexican American	<High school diploma	Married/living with partner	0.61	low	2	72	104	175.3	yes	No	5	2.2	0.3	276	627.273	0.681818	2.27273	0.593269	Former	6000	active	No	No	5068.18	0.526314	0
42867	Male	68	Non-Hispanic Non-Hispanic White	College diploma	Living alone	3.41	medium	1	73	99.9	177.8	yes	No	6.1	1.6	0.4	266	1014.12	1.525	3.8125	0.561867	Current	0	inactive	No	No	1027.77	1.05742	1
42880	Female	28	Non-Hispanic White	College diploma	Married/living with partner	2.91	medium	1	60	88.2	177	yes	No	2.7	2	0.4	277	373.95	0.54	1.35	0.498305	Former	21840	active	No	No	11194.9	0.205481	0
42890	Male	35	Mexican American	College diploma	Married/living with partner	2.33	medium	1	71	99.1	168.8	yes	No	4	2.3	0.5	251	436.522	0.869565	1.73913	0.587085	Never	2880	active	No	No	6369.28	0.941911	0
42898	Female	63	Non-Hispanic Non-Hispanic White	High school diploma	Living alone	5	high	1	68	110.8	172.5	yes	No	3.6	2.5	0.6	261	375.84	0.864	1.44	0.642319	Current	480	inactive	No	Yes	1803.05	0.888886	0
42901	Male	33	Non-Hispanic Non-Hispanic White	College diploma	Married/living with partner	3.92	high	1	59	139.3	180.5	no	No	3.9	3.8	0.7	333	341.763	0.718421	1.02632	0.771745	Never	43200	active	Yes	Yes	3406.03	2.60348	0
42902	Female	31	Mexican American	<High school diploma	Married/living with partner	0.8	low	1	65	115.8	141.5	no	No	6.4	3.4	0.6	299	562.824	1.12941	1.88235	0.818375	Never	0	inactive	No	No	2661.91	0.792724	0
42903	Female	22	Non-Hispanic White	College diploma	Married/living with partner	1.54	medium	2	62	73	167.5	yes	No	1.3	1.5	0.4	202	175.067	0.346667	0.866667	0.435821	Never	1800	active	No	No	15250.7	0.185112	0
42904	Female	47	Mexican American	<High school diploma	Living alone	2.14	medium	2	66	82	161.7	yes	No	3	2.1	0.5	305	435.714	0.714286	1.42857	0.507112	Never	4800	active	No	Yes	3671.58	0.337245	0
42906	Male	56	Non-Hispanic White	College diploma	Married/living with partner	4.57	high	2	66	112	184.1	yes	No	5	2.5	0.6	255	510	1.2	2	0.608365	Former	0	inactive	No	No	17710.9	1.49207	0
42922	Male	70	Other Hispanic	High school diploma	Living alone	3.53	high	1	71	105.2	169.1	yes	No	3.3	2	0.7	268	442.2	1.155	1.65	0.622117	Former	1800	active	Yes	No	1650.43	1.01884	0
42948	Male	41	Non-Hispanic White	College diploma	Living alone	4.75	high	1	63	102.8	174	yes	No	3.2	2.2	0.7	186	270.545	1.01818	1.45455	0.590805	Never	760	active	No	Yes	15066.2	1.28651	0
42960	Female	59	Non-Hispanic White	High school diploma	Married/living with partner	5	high	1	60	94.4	164.3	yes	No	3.5	1.6	0.5	354	774.375	1.09375	2.1875	0.574559	Never	4160	active	No	No	15841.5	0.458444	0
42969	Male	34	Non-Hispanic White	College diploma	Married/living with partner	0.5	low	1	69	112.7	177.3	yes	No	2.5	2	0.6	200	250	0.75	1.25	0.635646	Never	720	active	No	No	4203.81	1.66386	0
42979	Male	44	Mexican American	<High school diploma	Married/living with partner	0	low	1	71	108.5	179.9	yes	No	5.5	2.5	0.5	360	792	1.1	2.2	0.603113	Never	2040	active	No	No	4230.28	0.564775	0
42984	Male	28	Mexican American	<High school diploma	Married/living with partner	0.58	low	1	69	81	169.5	yes	No	2.9	1.6	0.4	179	324.438	0.725	1.8125	0.477876	Current	22320	active	No	No	5430.38	0.58574	0
42991	Female	30	Mexican American	<High school diploma	Living alone	1.93	medium	2	71	103.7	157.1	yes	No	4.5	2.5	0.8	285	513	1.44	1.8	0.660089	Never	21600	active	No	Yes	3391.13	0.603117	0
42997	Male	32	Non-Hispanic White	High school diploma	Living alone	0.59	low	1	60	82	189.8	yes	No	8	2.1	0.7	272	1036.19	2.66667	3.80952	0.432034	Current	5760	active	No	No	3554.18	0.299444	0
43001	Female	57	Non-Hispanic Non-Hispanic White	College diploma	Living alone	1.17	low	1	59	72.6	143.5	no	Yes	11	1.3	0.5	192	1624.62	4.23077	8.46154	0.505923	Never	3360	active	Yes	No	2862.96	0.12365	0
43018	Female	68	Mexican American	<High school diploma	Living alone	0.7	low	2	67	104.7	146	no	No	2.8	3.8	0.7	159	117.158	0.515789	0.736842	0.717123	Never	1800	active	Yes	No	947.586	0.404786	1
43019	Male	60	Non-Hispanic White	<High school diploma	Living alone	1.46	medium	2	62	109.7	161.9	yes	No	3.9	2.9	0.8	222	298.552	1.07586	1.34483	0.677579	Never	420	inactive	Yes	Yes	10683	4.30385	0
43024	Female	50	Other Hispanic	College diploma	Married/living with partner	5	high	2	66	97.2	152.2	yes	No	5	2.4	0.9	325	677.083	1.875	2.08333	0.638633	Current	5280	active	Yes	No	2464.53	1.13303	1
43030	Male	72	Non-Hispanic White	High school diploma	Living alone	1.15	low	2	67	110.2	173.7	yes	No	5.3	2	0.4	251	665.15	1.06	2.65	0.634427	Never	1920	active	Yes	No	1742.04	0.678401	0
43036	Female	56	Non-Hispanic Non-Hispanic White	College diploma	Living alone	1.69	medium	1	64	143	161.5	no	No	3.4	3.9	0.4	295	257.179	0.348718	0.871795	0.885449	Never	0	inactive	Yes	Yes	3809.96	1.26198	0
43044	Female	28	Non-Hispanic White	College diploma	Married/living with partner	3.98	high	2	63	82.9	166.7	yes	No	3.7	2.5	0.6	337	498.76	0.888	1.48	0.497301	Former	480	inactive	No	No	17025.6	0.419989	0
43056	Female	37	Mexican American	<High school diploma	Married/living with partner	0.9	low	1	65	92.9	158.4	no	No	5	1.9	0.6	297	781.579	1.57895	2.63158	0.58649	Never	0	inactive	No	No	2661.91	1.01041	0
43065	Female	33	Mexican American	College diploma	Living alone	5	high	1	65	82.5	156.6	no	No	2.5	1.9	0.3	366	481.579	0.394737	1.31579	0.52682	Never	0	inactive	No	No	2819.55	0.101473	0
43067	Female	30	Mexican American	College diploma	Living alone	3.82	high	2	65	94.5	164.9	yes	No	3.9	2.5	0.7	386	602.16	1.092	1.56	0.573075	Former	480	inactive	No	No	4786.95	0.124828	0
43074	Male	43	Non-Hispanic White	College diploma	Married/living with partner	1.99	medium	1	67	90.5	170.2	yes	No	7.2	2.5	0.6	348	1002.24	1.728	2.88	0.531727	Current	18720	active	No	No	15426.1	0.571921	0
43086	Female	42	Non-Hispanic White	College diploma	Married/living with partner	5	high	1	69	90.6	167.5	yes	No	2.5	1.5	0.4	239	398.333	0.666667	1.66667	0.540896	Never	1120	active	No	No	17643.1	0.241825	0
43091	Female	47	Mexican American	College diploma	Married/living with partner	1.45	medium	1	65	102.6	163.3	no	No	4.3	2.2	0.5	63	123.136	0.977273	1.95455	0.628291	Never	0	inactive	No	No	2813.2	0.484682	0
43106	Male	46	Non-Hispanic White	<High school diploma	Married/living with partner	0.07	low	2	59	113.4	181	no	No	4	2.2	0.5	290	527.273	0.909091	1.81818	0.626519	Never	5040	active	Yes	No	18969.6	0.376417	1
43111	Male	62	Other Hispanic	<High school diploma	Married/living with partner	0.93	low	1	62	108.7	152.3	no	No	4.2	2.7	0.5	223	346.889	0.777778	1.55556	0.713723	Former	1080	active	No	Yes	957.094	3.97901	0
43114	Male	24	Non-Hispanic White	College diploma	Living alone	0.7	low	2	60	124.5	187.9	yes	No	4	3.7	0.6	250	270.27	0.648649	1.08108	0.662586	Current	0	inactive	Yes	Yes	6431.34	1.47845	0
43119	Male	39	Non-Hispanic White	High school diploma	Married/living with partner	5	high	1	61	118.9	175.9	yes	No	2.7	1.8	0.4	179	268.5	0.6	1.5	0.675952	Never	36480	active	Yes	No	13086.3	0.493399	0
43124	Female	46	Non-Hispanic White	<High school diploma	Living alone	1.15	low	2	68	119.8	180.4	no	No	3.4	1.2	0.5	278	787.667	1.41667	2.83333	0.66408	Never	0	inactive	Yes	No	4501.99	0.133473	1
43134	Female	38	Non-Hispanic Non-Hispanic White	College diploma	Married/living with partner	3.94	high	2	60	80.7	160.2	yes	No	6.2	2.4	0.6	285	736.25	1.55	2.58333	0.503745	Never	2880	active	No	No	4059.13	0.198606	0
43151	Male	50	Non-Hispanic Non-Hispanic White	High school diploma	Living alone	5	high	1	68	89.5	176.2	yes	No	3.4	2.2	0.6	247	381.727	0.927273	1.54545	0.507946	Current	21600	active	No	Yes	4034.5	0.272297	0
43153	Male	64	Non-Hispanic Non-Hispanic White	<High school diploma	Living alone	1.57	medium	2	65	112.8	169.7	yes	No	6.1	2.2	0.3	344	953.818	0.831818	2.77273	0.664702	Current	0	inactive	Yes	No	1841.08	1.26038	0
43165	Female	49	Non-Hispanic White	High school diploma	Living alone	1.14	low	2	61	87.8	168	yes	No	5.5	3.4	0.8	286	462.647	1.29412	1.61765	0.522619	Current	15600	active	No	No	6144.86	0.520423	0
43167	Female	38	Non-Hispanic White	College diploma	Married/living with partner	1.83	medium	1	60	85	162.5	yes	No	2.8	1.9	0.4	254	374.316	0.589474	1.47368	0.523077	Never	2280	active	No	No	12477.3	0.476169	0
43172	Male	48	Non-Hispanic White	College diploma	Married/living with partner	5	high	2	68	97.8	188.6	yes	No	2.9	1.9	0.4	230	351.053	0.610526	1.52632	0.518558	Never	2640	active	Yes	No	15004.8	0.390153	0
43177	Male	36	Non-Hispanic White	College diploma	Married/living with partner	1.61	medium	2	60	88	172.7	no	No	3.3	1.9	0.5	273	474.158	0.868421	1.73684	0.509554	Former	3920	active	No	No	4010.92	10.3631	0
43180	Female	64	Non-Hispanic Non-Hispanic White	College diploma	Living alone	4.96	high	1	68	104.6	163	no	No	2	1.5	0.4	226	301.333	0.533333	1.33333	0.641718	Never	0	inactive	Yes	No	1800.81	0.146369	0
43186	Male	67	Non-Hispanic White	College diploma	Married/living with partner	2.43	medium	2	64	121.5	177.5	yes	No	3.8	1.7	0.6	163	364.353	1.34118	2.23529	0.684507	Former	1440	active	Yes	Yes	8446.15	1.44348	0
43187	Male	80	Non-Hispanic White	College diploma	Living alone	5	high	2	60	97	177.2	yes	No	4.9	0.9	0.7	355	1932.78	3.81111	5.44444	0.547404	Never	3960	active	Yes	No	5246.66	0.882224	0
43189	Male	48	Non-Hispanic White	College diploma	Married/living with partner	5	high	1	69	98.6	177	yes	No	2	1.9	0.5	215	226.316	0.526316	1.05263	0.557062	Former	1200	active	Yes	No	19765.9	1.83291	0
43190	Male	53	Mexican American	<High school diploma	Married/living with partner	2.12	medium	2	70	96	168.4	yes	No	2.3	1.7	0.4	301	407.235	0.541176	1.35294	0.570071	Former	6000	active	No	No	1519.41	0.661073	0
43198	Male	24	Non-Hispanic White	College diploma	Living alone	1.73	medium	2	59	90.5	182.2	yes	No	4.6	3	0.8	176	269.867	1.22667	1.53333	0.496707	Never	2400	active	No	No	17334.9	0.293632	0
43199	Female	22	Mexican American	<High school diploma	Living alone	0.79	low	2	66	70	152.8	yes	No	4.4	2.3	0.5	267	510.783	0.956522	1.91304	0.458115	Former	0	inactive	No	No	3841.68	0.141213	0
43205	Female	24	Mexican American	College diploma	Living alone	2.3	medium	1	66	107	163.8	yes	No	4.7	1.5	0.7	228	714.4	2.19333	3.13333	0.653236	Never	1440	active	No	No	4355.63	0.467613	0
43214	Female	54	Non-Hispanic White	College diploma	Married/living with partner	4.75	high	1	59	119.6	166.5	yes	No	3.9	4.9	0.9	465	370.102	0.716327	0.795918	0.718318	Former	320	inactive	Yes	Yes	16558.6	1.38905	0
43215	Female	31	Non-Hispanic Non-Hispanic White	<High school diploma	Married/living with partner	1.32	medium	1	74	107.1	167.1	yes	No	2.5	2.6	0.5	306	294.231	0.480769	0.961538	0.640934	Current	2600	active	No	No	3932.68	0.174519	0
43227	Male	39	Non-Hispanic Non-Hispanic White	College diploma	Married/living with partner	5	high	1	68	127	187.8	yes	No	3	2.3	0.4	289	376.957	0.521739	1.30435	0.676251	Never	1440	active	Yes	Yes	3870.44	0.396181	0
43230	Female	29	Non-Hispanic White	High school diploma	Living alone	1.7	medium	2	61	71	152.6	no	No	4.3	1.6	0.5	224	602	1.34375	2.6875	0.465269	Current	19200	active	No	No	18539.9	0.2495	0
43232	Male	46	Non-Hispanic White	College diploma	Married/living with partner	5	high	2	68	96	177.8	yes	No	2.4	2.3	0.5	221	230.609	0.521739	1.04348	0.539933	Never	15120	active	No	No	15004.8	0.461132	0
43233	Male	40	Mexican American	College diploma	Living alone	4.29	high	2	65	98.8	165.7	yes	Yes	11.1	2.9	0.6	234	895.655	2.29655	3.82759	0.596258	Current	4320	active	No	No	5192.3	0.741935	0
43238	Male	48	Non-Hispanic White	<High school diploma	Living alone	0.99	low	1	67	101.8	172.5	yes	No	4.3	1.4	0.5	223	684.929	1.53571	3.07143	0.590145	Current	13440	active	No	No	4792.17	0.917736	1
43240	Female	72	Other Hispanic	<High school diploma	Living alone	3.29	medium	1	62	108	155.6	no	No	3.4	1.5	0.5	322	729.867	1.13333	2.26667	0.694087	Former	2840	active	Yes	No	1191.96	0.820411	1
43242	Male	53	Non-Hispanic White	<High school diploma	Living alone	1.57	medium	1	68	85.8	175.2	no	No	4.1	2	0.5	248	508.4	1.025	2.05	0.489726	Never	3840	active	Yes	No	4095.67	0.108675	1
43245	Male	62	Non-Hispanic White	<High school diploma	Married/living with partner	1.07	low	2	59	126.1	172.1	yes	No	6.3	3.4	0.6	202	374.294	1.11176	1.85294	0.732714	Current	0	inactive	Yes	No	3323.89	3.35845	0
43256	Female	36	Other Hispanic	<High school diploma	Living alone	0.87	low	1	62	87.8	149.9	no	No	5.1	1.8	0.4	396	1122	1.13333	2.83333	0.585724	Never	9600	active	No	No	2683.64	0.192092	0
43263	Female	27	Other Hispanic	College diploma	Living alone	2.88	medium	2	69	74.3	159.8	yes	No	4	1.3	0.4	314	966.154	1.23077	3.07692	0.464956	Never	480	inactive	No	No	2789.2	0.415829	0
43264	Female	46	Other Hispanic	College diploma	Married/living with partner	5	high	1	68	88.7	163.7	yes	No	6.1	2.1	0.5	395	1147.38	1.45238	2.90476	0.541845	Former	10320	active	No	No	3244.24	0.689227	0
43273	Female	28	Non-Hispanic Non-Hispanic White	College diploma	Married/living with partner	2.42	medium	1	68	126.2	170.6	yes	No	3.5	1.8	0.2	250	486.111	0.388889	1.94444	0.739742	Never	40	inactive	No	No	4932.78	0.158036	0
43285	Male	24	Non-Hispanic White	High school diploma	Married/living with partner	3.29	medium	1	69	109.5	179.5	yes	No	3	3.1	0.5	274	265.161	0.483871	0.967742	0.610028	Current	24000	active	No	No	18048.1	1.08765	0
43293	Female	52	Mexican American	<High school diploma	Married/living with partner	2.42	medium	1	65	91.3	154	yes	No	3.4	3.6	0.6	355	335.278	0.566667	0.944444	0.592857	Former	0	inactive	No	No	1888.35	0.67506	0
43297	Male	67	Mexican American	<High school diploma	Married/living with partner	1.75	medium	1	73	113.9	169.4	yes	No	3.4	2.1	0.5	197	318.952	0.809524	1.61905	0.672373	Never	0	inactive	Yes	No	1019.44	0.85	0
43300	Female	45	Non-Hispanic Non-Hispanic White	<High school diploma	Married/living with partner	3.49	medium	1	68	106.3	159.4	no	No	2.5	2	0.3	232	290	0.375	1.25	0.666876	Never	480	inactive	Yes	Yes	4739.92	0.24232	0
43301	Female	66	Mexican American	<High school diploma	Living alone	1.45	medium	1	65	103.1	158.9	no	No	3.6	1.8	0.4	281	562	0.8	2	0.648836	Never	0	inactive	Yes	Yes	964.229	0.415449	0
43302	Female	68	Non-Hispanic White	High school diploma	Married/living with partner	2.83	medium	2	60	113.6	162.3	yes	No	1.9	1.6	0.6	213	252.938	0.7125	1.1875	0.699938	Former	0	inactive	Yes	Yes	5918.21	0.596528	1
43311	Male	47	Mexican American	College diploma	Married/living with partner	1.07	low	1	70	97.5	181.7	no	No	6.2	1.6	1	274	1061.75	3.875	3.875	0.536599	Never	0	inactive	No	No	2616.25	0.794512	0
43329	Male	37	Non-Hispanic White	College diploma	Married/living with partner	5	high	2	69	152.3	180.7	yes	No	5.3	2.3	0.4	273	629.087	0.921739	2.30435	0.842833	Never	1240	active	Yes	No	9506.92	2.48867	0
43338	Female	26	Non-Hispanic White	College diploma	Married/living with partner	5	high	1	73	67.8	165.4	no	No	2.7	2.5	0.5	342	369.36	0.54	1.08	0.409915	Never	1520	active	No	No	15007.8	0.276693	0
43340	Female	34	Other Hispanic	High school diploma	Married/living with partner	1.99	medium	1	71	80.9	165.7	yes	No	3	1.9	0.5	200	315.789	0.789474	1.57895	0.488232	Never	0	inactive	No	No	3745.82	0.252137	0
43353	Female	71	Non-Hispanic White	High school diploma	Married/living with partner	2.92	medium	1	60	80.4	160.8	yes	No	5	1.2	0.8	646	2691.67	3.33333	4.16667	0.5	Former	3360	active	Yes	No	5945.7	0.163755	0
43356	Female	34	Non-Hispanic Non-Hispanic White	High school diploma	Married/living with partner	4.25	high	2	68	82.2	158.1	yes	No	2.7	2.2	0.4	328	402.545	0.490909	1.22727	0.519924	Never	180	inactive	No	No	4045.14	0.0662648	0
43364	Male	25	Non-Hispanic White	College diploma	Living alone	0.19	low	2	68	82.7	177	yes	No	3	1.7	0.7	260	458.824	1.23529	1.76471	0.467232	Never	6960	active	No	No	14054	0.63677	0
43365	Male	56	Mexican American	<High school diploma	Living alone	0.58	low	1	71	92.1	166.2	yes	No	2.8	2	0.4	187	261.8	0.56	1.4	0.554152	Former	720	active	Yes	Yes	2618.02	1.59526	0
43367	Female	41	Non-Hispanic White	College diploma	Married/living with partner	4.83	high	2	64	76.3	161	yes	No	11.2	2	0.5	467	2615.2	2.8	5.6	0.473913	Current	480	inactive	Yes	No	14270.1	0.287943	0
43376	Male	33	Mexican American	High school diploma	Married/living with partner	1.45	medium	1	65	104.1	184.9	yes	No	3.9	2.1	0.4	198	367.714	0.742857	1.85714	0.563007	Never	53760	active	No	No	3751.75	0.696636	0
43381	Male	28	Non-Hispanic White	College diploma	Married/living with partner	4.38	high	1	59	102.9	188.3	yes	No	4.2	2.3	0.6	319	582.522	1.09565	1.82609	0.546468	Former	6960	active	No	No	14866.1	1.12695	0
43393	Male	21	Other Race	<High school diploma	Living alone	4.72	high	2	68	77.9	176.2	yes	No	5.2	2.7	0.5	256	493.037	0.962963	1.92593	0.442111	Current	0	inactive	No	No	4109.23	0.287372	0
43404	Female	40	Non-Hispanic White	College diploma	Living alone	1.76	medium	2	66	77.3	163.1	yes	No	3.4	2.2	0.5	386	596.545	0.772727	1.54545	0.473942	Current	300	inactive	No	No	7932.46	0.149175	0
43407	Female	55	Mexican American	<High school diploma	Living alone	2.15	medium	1	66	81.3	151.8	yes	No	5	2.4	0.5	419	872.917	1.04167	2.08333	0.535573	Former	40	inactive	Yes	No	2794.25	1.14284	0
43408	Male	22	Non-Hispanic Non-Hispanic White	<High school diploma	Married/living with partner	1.16	low	1	59	74.2	177.5	yes	No	3	1.7	0.5	224	395.294	0.882353	1.76471	0.418028	Current	1680	active	No	No	4056.59	0.380438	0
43411	Male	47	Non-Hispanic Non-Hispanic White	<High school diploma	Married/living with partner	4.66	high	1	62	94.4	173.8	yes	No	3.5	2.1	0.4	225	375	0.666667	1.66667	0.543153	Former	3600	active	No	No	3665.39	0.811335	0
43414	Male	67	Non-Hispanic Non-Hispanic White	College diploma	Married/living with partner	0.81	low	2	61	78.7	170.3	yes	No	3.4	2.6	0.6	284	371.385	0.784615	1.30769	0.462126	Current	20160	active	No	No	1576.73	0.207144	1
43415	Male	52	Non-Hispanic White	High school diploma	Married/living with partner	5	high	2	63	110.7	178.1	yes	No	3.7	1.9	0.4	170	331.053	0.778947	1.94737	0.621561	Never	0	inactive	Yes	Yes	13935.3	0.502632	0
43424	Female	37	Non-Hispanic White	College diploma	Married/living with partner	3.41	medium	2	60	78	157.3	no	No	4	1.1	0.6	333	1210.91	2.18182	3.63636	0.495868	Never	3360	active	No	No	13436	0.307222	0
43425	Female	32	Non-Hispanic White	College diploma	Married/living with partner	2.02	medium	2	63	111.5	163.1	no	No	2.5	1.9	0.4	253	332.895	0.526316	1.31579	0.68363	Never	0	inactive	No	No	11905	0.342669	0
43435	Female	34	Mexican American	College diploma	Married/living with partner	1.93	medium	2	71	94.8	160.5	yes	No	3.8	3.5	0.4	260	282.286	0.434286	1.08571	0.590654	Never	27360	active	No	No	3391.13	0.465036	0
43445	Male	50	Mexican American	<High school diploma	Married/living with partner	1.13	low	1	69	98.2	160.9	no	No	4.6	2.8	0.4	258	423.857	0.657143	1.64286	0.610317	Current	2400	active	No	Yes	2323.73	1.20312	0
43451	Male	36	Non-Hispanic White	College diploma	Living alone	5	high	2	72	90.4	184.6	yes	No	6.5	1.8	0.9	200	722.222	3.25	3.61111	0.489707	Current	6720	active	No	No	13706	0.420832	0
43453	Male	40	Mexican American	<High school diploma	Married/living with partner	0.5	low	1	71	119.3	173.2	no	No	4.3	2.5	0.6	187	321.64	1.032	1.72	0.688799	Never	15360	active	No	No	4230.28	1.79429	0
43463	Male	20	Non-Hispanic White	High school diploma	Married/living with partner	3.43	medium	1	61	68	170.9	no	No	2	2.2	0.6	259	235.455	0.545455	0.909091	0.397894	Never	16560	active	No	No	15635	0.149873	0
43466	Female	47	Non-Hispanic White	College diploma	Married/living with partner	5	high	2	60	90.7	157	no	No	2.5	2.3	0.6	219	238.043	0.652174	1.08696	0.577707	Never	2040	active	No	No	19888.5	0.366443	0
43469	Male	78	Non-Hispanic White	High school diploma	Married/living with partner	1.46	medium	1	60	107	174.2	no	No	3.9	1.6	0.6	323	787.312	1.4625	2.4375	0.614237	Never	0	inactive	No	No	1820.3	0.478412	0
43475	Male	31	Non-Hispanic White	High school diploma	Living alone	1.16	low	1	61	81.3	174	yes	No	3.6	2.2	0.6	250	409.091	0.981818	1.63636	0.467241	Current	5760	active	No	No	13086.3	0.862473	0
43479	Male	63	Other Hispanic	High school diploma	Married/living with partner	4.25	high	1	62	104	173.6	yes	No	3	1.3	0.3	178	410.769	0.692308	2.30769	0.599078	Never	4800	active	No	No	710.509	0.362695	0
43496	Male	43	Non-Hispanic Non-Hispanic White	High school diploma	Married/living with partner	3.3	medium	2	66	100.5	168.2	yes	No	4	1.9	0.6	221	465.263	1.26316	2.10526	0.597503	Never	4320	active	No	No	5179.25	0.547162	0
43527	Male	67	Mexican American	College diploma	Living alone	2.94	medium	1	71	112.2	172.5	yes	Yes	3.8	1.4	0.8	240	651.429	2.17143	2.71429	0.650435	Current	8400	active	Yes	Yes	1361.39	0.813922	0
43537	Male	23	Other Race	College diploma	Married/living with partner	1.47	medium	1	69	86.8	176.6	yes	No	2.5	1.9	0.5	256	336.842	0.657895	1.31579	0.491506	Never	1920	active	No	No	8597.97	0.239302	0
43541	Male	74	Non-Hispanic White	College diploma	Living alone	0.87	low	2	62	113.9	158.8	no	No	4.8	1.8	0.7	234	624	1.86667	2.66667	0.717254	Current	3360	active	No	No	5628.33	1.79687	0
43546	Female	72	Non-Hispanic Non-Hispanic White	College diploma	Living alone	1.47	medium	2	67	83	150.1	yes	No	3	2.2	0.6	419	571.364	0.818182	1.36364	0.552965	Never	0	inactive	Yes	No	2171.26	0.251114	1
43550	Male	74	Non-Hispanic Non-Hispanic White	College diploma	Living alone	4.04	high	2	66	136.1	174.6	yes	Yes	7.7	1.3	0.4	343	2031.62	2.36923	5.92308	0.779496	Former	0	inactive	Yes	Yes	2839.05	0.76181	1
43552	Female	45	Non-Hispanic White	College diploma	Married/living with partner	2.59	medium	2	68	88.9	166.9	yes	No	2.7	1.7	0.5	303	481.235	0.794118	1.58824	0.532654	Current	6960	active	No	No	13756.3	0.45477	0
43553	Female	24	Non-Hispanic Non-Hispanic White	College diploma	Married/living with partner	2.5	medium	2	68	145.5	160.2	no	No	7	3.4	0.9	263	541.471	1.85294	2.05882	0.90824	Never	10080	active	No	No	4786.92	0.601317	0
43558	Male	69	Non-Hispanic White	College diploma	Married/living with partner	5	high	2	63	108.5	181.9	yes	No	2.1	2.1	0.9	157	157	0.9	1	0.596482	Former	0	inactive	Yes	Yes	7812.04	0.229049	0
43564	Female	29	Mexican American	High school diploma	Married/living with partner	3.13	medium	2	74	85.1	153.5	yes	No	7	2.2	0.8	223	709.545	2.54545	3.18182	0.554397	Never	700	active	No	No	2877.09	0.433753	0
43581	Male	40	Mexican American	<High school diploma	Living alone	2.27	medium	1	71	91.9	175.7	yes	No	5.1	2.2	0.5	349	809.045	1.15909	2.31818	0.523051	Current	560	inactive	No	No	4230.28	0.830903	0
43583	Female	24	Non-Hispanic Non-Hispanic White	College diploma	Living alone	1.93	medium	1	64	90.6	158.7	yes	No	5	2.1	0.6	236	561.905	1.42857	2.38095	0.570888	Current	6000	active	No	No	4694.83	0.534771	0
43588	Female	44	Non-Hispanic White	High school diploma	Married/living with partner	5	high	1	67	151.1	170.5	no	No	4.9	1.9	0.3	286	737.579	0.773684	2.57895	0.886217	Never	0	inactive	Yes	No	13450.4	1.11021	0
43590	Male	80	Non-Hispanic White	High school diploma	Married/living with partner	1.83	medium	1	67	100.7	169.3	no	No	3.1	1.5	0.7	146	301.733	1.44667	2.06667	0.594802	Former	840	active	No	No	3636.15	0.361399	0
43592	Female	69	Non-Hispanic White	High school diploma	Married/living with partner	1.29	low	2	60	90.6	159.6	no	No	6.9	2.3	0.5	235	705	1.5	3	0.567669	Former	4260	active	Yes	No	11871.8	1.17106	1
43602	Female	54	Non-Hispanic White	College diploma	Living alone	3.93	high	2	62	95	166.1	no	No	3.3	1.8	0.4	277	507.833	0.733333	1.83333	0.571945	Never	9600	active	Yes	No	19234.6	0.392511	0
43610	Male	51	Mexican American	College diploma	Living alone	2.41	medium	1	70	135.4	178.3	yes	No	4.3	1.9	0.5	254	574.842	1.13158	2.26316	0.759394	Former	0	inactive	Yes	Yes	1727.52	1.27019	0
43614	Male	64	Non-Hispanic White	High school diploma	Living alone	1.35	medium	2	62	95.3	172.5	yes	No	2.3	2.2	0.6	265	277.045	0.627273	1.04545	0.552464	Former	1920	active	Yes	No	9638.41	0.488564	0
43624	Male	53	Non-Hispanic Non-Hispanic White	<High school diploma	Married/living with partner	4.29	high	2	68	117.7	175.8	yes	No	4.4	1.1	0.5	222	888	2	4	0.669511	Never	2880	active	Yes	Yes	3596.49	0.769636	1
43629	Female	26	Mexican American	<High school diploma	Living alone	1.97	medium	2	71	105.4	152.6	no	No	3.2	2.5	0.5	318	407.04	0.64	1.28	0.690695	Never	0	inactive	No	No	3291.15	0.70315	0
43632	Female	65	Other Hispanic	High school diploma	Living alone	0.53	low	1	62	108.5	156.2	no	No	4	1.2	0.6	289	963.333	2	3.33333	0.694622	Never	1200	active	No	No	822.647	0.529215	1
43633	Male	41	Mexican American	High school diploma	Married/living with partner	1.16	low	1	61	107.7	171.3	yes	No	2.2	1.8	0.3	246	300.667	0.366667	1.22222	0.628722	Never	22080	active	No	No	3435.63	1.38149	0
43641	Female	20	Non-Hispanic White	High school diploma	Living alone	0.46	low	1	61	100.1	151.5	no	No	3.6	2	0.5	223	401.4	0.9	1.8	0.660726	Never	1080	active	No	No	10281.7	1.44771	0
43647	Female	31	Other Hispanic	College diploma	Married/living with partner	3.41	medium	2	71	125.6	154.6	no	No	3.4	1.2	0.3	200	566.667	0.85	2.83333	0.812419	Never	3680	active	No	No	3391.13	0.367112	0
43656	Male	80	Non-Hispanic Non-Hispanic White	<High school diploma	Married/living with partner	3.49	medium	1	59	108.7	180	yes	No	3.8	2.1	0.5	155	280.476	0.904762	1.80952	0.603889	Never	0	inactive	Yes	Yes	1810.87	0.725965	0
43678	Male	43	Non-Hispanic White	College diploma	Married/living with partner	1.4	medium	1	60	132.5	184.6	yes	No	3.6	2.4	0.5	296	444	0.75	1.5	0.717768	Never	4080	active	Yes	No	3750.18	2.34695	0
43682	Female	80	Non-Hispanic White	High school diploma	Living alone	2.02	medium	2	63	100.7	153.4	no	No	4.6	2.2	0.3	313	654.455	0.627273	2.09091	0.656454	Former	0	inactive	Yes	Yes	4944.75	3.24365	1
43709	Male	51	Mexican American	<High school diploma	Married/living with partner	1.04	low	1	66	113.8	165.2	yes	No	4	2.1	0.6	275	523.81	1.14286	1.90476	0.688862	Former	9600	active	Yes	No	2343.56	1.12051	0
43710	Male	50	Non-Hispanic White	College diploma	Married/living with partner	4.72	high	2	63	122.7	184	yes	No	4.7	1.6	0.4	190	558.125	1.175	2.9375	0.666848	Never	1000	active	Yes	Yes	17549.6	1.41074	0
43717	Male	34	Mexican American	College diploma	Married/living with partner	3.69	high	2	72	109.5	184	yes	No	4.3	1.9	0.4	238	538.632	0.905263	2.26316	0.595109	Never	1200	active	Yes	No	5684.63	0.715222	0
43727	Female	46	Other Hispanic	<High school diploma	Married/living with partner	0.66	low	2	72	108	154	no	No	3.7	3	0.7	479	590.767	0.863333	1.23333	0.701299	Never	0	inactive	No	No	3427.33	0.719078	0
43732	Male	33	Non-Hispanic Non-Hispanic White	High school diploma	Living alone	3.56	high	2	67	93	179.9	yes	No	1.9	1.7	0.4	286	319.647	0.447059	1.11765	0.516954	Former	1440	active	Yes	No	4444.63	0.467932	0
43738	Male	80	Non-Hispanic White	<High school diploma	Married/living with partner	1.09	low	2	66	94.9	165.3	yes	No	2.8	3.5	0.5	237	189.6	0.4	0.8	0.574108	Never	700	active	No	Yes	1053.04	0.423356	0
43740	Female	34	Non-Hispanic Non-Hispanic White	College diploma	Married/living with partner	4.83	high	2	70	80.9	163.3	no	No	4.2	2.1	0.8	300	600	1.6	2	0.495407	Never	0	inactive	No	No	3446.29	0.143668	0
43743	Male	80	Non-Hispanic White	College diploma	Living alone	3.92	high	1	63	107	174	yes	No	4.4	1.7	0.6	315	815.294	1.55294	2.58824	0.614943	Never	0	inactive	Yes	Yes	3502.14	0.422019	0
43747	Male	29	Mexican American	<High school diploma	Married/living with partner	2.28	medium	1	66	131.6	180.8	yes	No	5	2.8	0.5	297	530.357	0.892857	1.78571	0.727876	Never	2240	active	No	No	6258.58	2.55458	0
43749	Male	63	Other Hispanic	High school diploma	Married/living with partner	1.97	medium	1	72	84.1	173.6	yes	No	2.4	1.9	0.7	228	288	0.884211	1.26316	0.484447	Current	240	inactive	No	No	1259.23	0.601991	1
43756	Male	64	Mexican American	<High school diploma	Married/living with partner	0.65	low	2	72	114.7	170.5	no	No	3.7	1.7	0.4	257	559.353	0.870588	2.17647	0.672727	Former	5040	active	No	No	1090.84	0.504545	0
43770	Female	43	Non-Hispanic White	College diploma	Married/living with partner	5	high	2	68	85.9	163.7	yes	No	1.8	1.8	0.4	227	227	0.4	1	0.52474	Former	5120	active	No	No	13756.3	0.23183	0
43771	Female	68	Mexican American	High school diploma	Married/living with partner	1.28	low	1	66	91.4	153.7	yes	No	3.8	0.9	0.4	301	1270.89	1.68889	4.22222	0.594665	Never	0	inactive	Yes	No	1611.23	0.488497	0
43772	Female	58	Non-Hispanic White	High school diploma	Living alone	1.19	low	2	59	98.5	165.5	no	No	2.5	2.3	0.5	224	243.478	0.543478	1.08696	0.595166	Never	11760	active	Yes	No	5017.17	0.677689	0
43776	Male	48	Mexican American	College diploma	Married/living with partner	5	high	2	65	125.8	172.3	yes	No	3.2	2.6	0.8	220	270.769	0.984615	1.23077	0.730122	Never	0	inactive	No	No	5192.3	0.740056	0
43777	Male	26	Non-Hispanic White	High school diploma	Living alone	2.21	medium	2	60	88	178.1	yes	No	3.1	1.4	0.3	267	591.214	0.664286	2.21429	0.494104	Former	24000	active	No	No	20617.3	0.842498	0
43790	Female	36	Non-Hispanic White	High school diploma	Living alone	3.5	medium	2	59	86.4	169.2	yes	No	4.9	2.6	0.6	316	595.538	1.13077	1.88462	0.510638	Never	3120	active	No	No	13858.7	0.198191	0
43801	Male	72	Non-Hispanic White	College diploma	Living alone	3.85	high	2	63	106.9	172	yes	No	3	1.9	0.6	153	241.579	0.947368	1.57895	0.621512	Former	720	active	No	No	4931.46	1.55554	0
43807	Male	22	Non-Hispanic White	College diploma	Living alone	4.29	high	2	72	78.8	169.4	no	No	3.5	2.5	0.9	218	305.2	1.26	1.4	0.465171	Never	160	inactive	No	No	16824.2	0.294039	0
43810	Male	21	Non-Hispanic White	High school diploma	Living alone	5	high	2	68	84.6	186.5	yes	No	3.6	2.2	0.7	241	394.364	1.14545	1.63636	0.453619	Current	3360	active	No	No	13700.8	0.203753	0
43827	Male	60	Non-Hispanic White	College diploma	Married/living with partner	3.86	high	2	72	108	173.6	yes	No	5.8	2.5	1.5	108	250.56	3.48	2.32	0.62212	Never	10080	active	Yes	Yes	10069.4	4.39019	1
43842	Male	62	Other Hispanic	College diploma	Married/living with partner	2.14	medium	2	67	113.5	175.5	yes	No	4.1	2.2	0.4	334	622.455	0.745455	1.86364	0.646724	Never	4320	active	No	Yes	1248.59	0.490352	0
43844	Female	36	Other Race	College diploma	Married/living with partner	5	high	1	70	65.9	161.2	yes	No	2.5	2.2	0.3	337	382.955	0.340909	1.13636	0.408809	Current	0	inactive	No	No	9544.35	0.209747	0
43847	Female	65	Mexican American	<High school diploma	Living alone	1.22	low	1	71	104	149.6	yes	No	2.5	2.6	0.7	300	288.462	0.673077	0.961538	0.695187	Former	0	inactive	Yes	Yes	1320.23	1.01995	0
43850	Male	25	Mexican American	<High school diploma	Married/living with partner	1.22	low	1	69	104.8	169.3	yes	No	4.1	2.1	0.7	271	529.095	1.36667	1.95238	0.619019	Never	25440	active	No	No	5430.38	0.349544	0
43862	Male	53	Non-Hispanic Non-Hispanic White	High school diploma	Married/living with partner	1.99	medium	1	68	104.8	174.4	no	No	1.7	1.8	0.3	333	314.5	0.283333	0.944444	0.600917	Former	0	inactive	No	No	3123.93	0.302213	0
43881	Male	64	Non-Hispanic White	College diploma	Married/living with partner	5	high	2	66	114.2	181.1	yes	No	3.2	1.5	0.6	185	394.667	1.28	2.13333	0.630591	Never	40	inactive	Yes	No	10506.2	0.607127	0
43882	Female	50	Non-Hispanic Non-Hispanic White	High school diploma	Married/living with partner	2.84	medium	2	68	94.7	157.5	yes	No	4.7	2.6	0.4	300	542.308	0.723077	1.80769	0.60127	Former	840	active	Yes	Yes	3528.96	0.50914	0
43885	Male	22	Mexican American	High school diploma	Living alone	2.35	medium	1	64	82.9	171.8	yes	No	4.1	3.3	0.6	235	291.97	0.745455	1.24242	0.482538	Current	7200	active	No	No	4053.85	0.237377	0
43886	Female	22	Mexican American	<High school diploma	Married/living with partner	0.58	low	1	69	119.6	170.2	no	No	5.6	2.6	0.6	294	633.231	1.29231	2.15385	0.702703	Current	4800	active	No	No	3930.45	0.818875	0
43889	Male	27	Non-Hispanic White	High school diploma	Married/living with partner	1.96	medium	1	73	127.8	182.8	no	No	4.3	2.3	0.5	258	482.348	0.934783	1.86957	0.699125	Never	14400	active	Yes	No	13736.2	4.193	0
43892	Male	35	Mexican American	<High school diploma	Married/living with partner	1.81	medium	2	66	106.5	174.6	yes	No	5.4	1.8	0.6	216	648	1.8	3	0.609966	Current	8640	active	No	No	5028.77	1.49351	0
43893	Female	45	Non-Hispanic Non-Hispanic White	College diploma	Living alone	1.69	medium	1	68	121.7	173.1	no	No	4.8	2.6	0.3	339	625.846	0.553846	1.84615	0.703062	Never	0	inactive	Yes	Yes	4020.35	1.30988	0
43895	Female	50	Non-Hispanic White	College diploma	Married/living with partner	5	high	2	72	114.5	159.6	yes	No	3.4	2.4	0.7	283	400.917	0.991667	1.41667	0.717419	Former	4320	active	Yes	No	18724.9	0.750933	0
43899	Male	35	Non-Hispanic White	High school diploma	Married/living with partner	3.49	medium	1	69	77.4	178.6	yes	No	3.6	2.1	0.8	255	437.143	1.37143	1.71429	0.433371	Current	12000	active	No	No	14972.3	0.214932	0
43902	Female	41	Non-Hispanic White	College diploma	Married/living with partner	0.58	low	1	60	71.5	158.2	yes	No	3	1.9	0.6	224	353.684	0.947368	1.57895	0.45196	Former	3240	active	No	No	10875.3	0.162295	0
43904	Male	70	Non-Hispanic White	<High school diploma	Married/living with partner	0.97	low	2	60	98.7	167.3	yes	No	4.2	1.4	0.5	254	762	1.5	3	0.589958	Never	0	inactive	Yes	Yes	2041.37	1.24833	0
43909	Male	36	Other Race	College diploma	Married/living with partner	0.45	low	2	66	98.1	171.4	yes	No	5.4	2.9	0.5	321	597.724	0.931034	1.86207	0.572345	Current	480	inactive	Yes	No	4464.2	1.97524	0
43910	Male	53	Mexican American	<High school diploma	Married/living with partner	1.16	low	1	71	98.3	160.9	yes	No	5	2.9	0.5	312	537.931	0.862069	1.72414	0.610938	Former	0	inactive	No	No	2618.02	1.28816	0
43916	Female	55	Non-Hispanic White	<High school diploma	Married/living with partner	2.14	medium	2	59	89.4	160.2	no	No	4.7	2.3	0.5	305	623.261	1.02174	2.04348	0.558052	Current	0	inactive	No	No	5191.93	0.585792	0
43924	Female	45	Non-Hispanic White	College diploma	Living alone	2.92	medium	1	63	98.8	168.1	yes	No	3	1.6	0.3	262	491.25	0.5625	1.875	0.587745	Never	960	active	No	No	13572.8	0.348311	0
43932	Male	27	Non-Hispanic Non-Hispanic White	High school diploma	Married/living with partner	2.12	medium	1	74	109	176.2	no	No	4.4	2.4	0.5	291	533.5	0.916667	1.83333	0.618615	Never	22080	active	No	No	3902.89	0.314103	0
43944	Female	34	Other Hispanic	<High school diploma	Married/living with partner	1.75	medium	1	65	94.1	154	no	No	3.6	2.4	0.5	272	408	0.75	1.5	0.611039	Never	3600	active	No	No	7330.85	0.429171	0
43945	Male	70	Non-Hispanic White	High school diploma	Married/living with partner	2.86	medium	2	59	111.5	169.6	yes	No	4.7	2.9	0.7	225	364.655	1.13448	1.62069	0.657429	Never	2880	active	Yes	Yes	1679.03	1.76452	0
43955	Female	27	Mexican American	<High school diploma	Living alone	0.87	low	1	70	91.6	165.7	yes	No	3	0.9	0.3	245	816.667	1	3.33333	0.552806	Never	0	inactive	No	No	2541.93	0.330239	0
43959	Female	57	Non-Hispanic White	High school diploma	Living alone	3.37	medium	2	61	81.4	154.2	yes	No	1.5	1.5	0.3	272	272	0.3	1	0.527886	Former	1800	active	No	No	20058.2	0.588167	0
43960	Male	43	Mexican American	High school diploma	Married/living with partner	1.68	medium	1	66	121.4	172.2	yes	No	3.8	2.5	0.6	287	436.24	0.912	1.52	0.704994	Never	2880	active	No	No	4773.26	0.996471	0
43968	Male	52	Non-Hispanic White	College diploma	Living alone	1.01	low	2	63	91.9	173.1	yes	No	5.4	2.3	0.4	308	723.13	0.93913	2.34783	0.530907	Former	0	inactive	Yes	No	3697.02	0.861306	0
43980	Male	53	Mexican American	<High school diploma	Married/living with partner	0.7	low	1	71	99.3	176.2	yes	No	3.8	2.2	0.6	296	511.273	1.03636	1.72727	0.563564	Former	2400	active	No	No	2618.02	0.673699	0
43991	Female	61	Other Hispanic	<High school diploma	Living alone	1.05	low	2	65	114.6	159.8	yes	No	2.5	2.2	0.5	231	262.5	0.568182	1.13636	0.717146	Never	0	inactive	No	No	1593.98	1.07704	0
43992	Female	21	Mexican American	College diploma	Living alone	2.49	medium	1	66	99.9	157.5	yes	No	5	1.7	0.4	360	1058.82	1.17647	2.94118	0.634286	Never	0	inactive	No	No	3726.61	1.08579	0
43994	Male	46	Non-Hispanic White	High school diploma	Living alone	4.62	high	2	60	96.7	183.3	yes	No	3.1	4.4	0.6	240	169.091	0.422727	0.704545	0.52755	Current	0	inactive	Yes	No	18302.9	1.56729	1
44010	Female	72	Mexican American	<High school diploma	Married/living with partner	1.42	medium	2	72	112	158.1	no	No	3.2	2.8	0.6	201	229.714	0.685714	1.14286	0.708412	Never	0	inactive	Yes	Yes	1538.81	0.57357	1
44017	Male	42	Non-Hispanic White	High school diploma	Married/living with partner	2.91	medium	1	69	89	177.3	no	No	2.9	1.5	0.5	246	475.6	0.966667	1.93333	0.501974	Never	19200	active	No	No	20127.8	0.307014	0
44021	Female	71	Non-Hispanic White	High school diploma	Married/living with partner	3.65	high	1	65	93.1	163.9	no	No	2.9	1	0.5	265	768.5	1.45	2.9	0.568029	Former	6720	active	Yes	No	5305.85	0.440394	0
44032	Female	47	Non-Hispanic Non-Hispanic White	College diploma	Living alone	3.58	high	1	74	113.9	169.1	yes	No	3.7	2.2	0.8	386	649.182	1.34545	1.68182	0.673566	Former	1200	active	Yes	No	4107.85	0.610983	0
44034	Female	49	Non-Hispanic White	College diploma	Married/living with partner	5	high	1	70	71.4	167.5	yes	No	1.8	1.3	0.3	312	432	0.415385	1.38462	0.426269	Former	3840	active	No	No	11410.3	0.111237	0
44035	Male	28	Non-Hispanic Non-Hispanic White	College diploma	Living alone	1.63	medium	2	74	77.4	175.2	yes	No	1.7	1.7	0.3	200	200	0.3	1	0.441781	Never	3360	active	No	No	4073.09	0.110445	0
44039	Female	57	Other Hispanic	<High school diploma	Married/living with partner	0.87	low	1	62	123.6	145.8	yes	No	3.1	2.1	0.5	334	493.048	0.738095	1.47619	0.847737	Never	420	inactive	No	Yes	1750.05	0.357337	0
44051	Male	32	Non-Hispanic White	<High school diploma	Married/living with partner	4.14	high	1	68	90.2	184.8	yes	No	3.8	1.4	0.4	264	716.571	1.08571	2.71429	0.488095	Never	1080	active	No	No	11270.7	0.277681	0
44052	Female	41	Mexican American	College diploma	Married/living with partner	2.54	medium	1	73	108.1	158.2	no	No	4.6	1.9	0.3	196	474.526	0.726316	2.42105	0.683312	Never	0	inactive	No	No	2648.59	0.361118	0
44057	Female	22	Non-Hispanic White	College diploma	Married/living with partner	4.33	high	2	69	75.7	166	yes	No	3.1	1.9	0.4	173	282.263	0.652632	1.63158	0.456024	Current	4320	active	No	No	12363.8	0.25332	0
44060	Female	69	Non-Hispanic White	College diploma	Living alone	4.13	high	1	67	88.3	161.5	yes	No	5.6	2	0.6	230	644	1.68	2.8	0.546749	Never	480	inactive	Yes	No	12093.8	0.641284	0
44071	Female	43	Non-Hispanic White	College diploma	Married/living with partner	3.13	medium	2	67	106.4	175.9	no	No	4.7	1.9	0.5	245	606.053	1.23684	2.47368	0.604889	Never	1080	active	Yes	No	16333.5	1.05883	0
44073	Male	34	Non-Hispanic White	High school diploma	Living alone	4.33	high	2	61	96.8	172.3	no	Yes	7.3	1.3	0.7	242	1358.92	3.93077	5.61538	0.561811	Current	12240	active	Yes	No	14953.4	1.03759	0
44074	Male	22	Non-Hispanic White	<High school diploma	Living alone	0.71	low	2	66	107	176.2	yes	No	3	1.7	0.6	215	379.412	1.05882	1.76471	0.607264	Never	40320	active	No	No	8729.54	0.624895	0
44095	Female	24	Non-Hispanic Non-Hispanic White	High school diploma	Living alone	1.63	medium	2	68	103.6	162.8	no	No	3.4	2.1	0.5	388	628.19	0.809524	1.61905	0.636364	Never	0	inactive	No	No	4397.24	0.113317	0
44096	Male	64	Other Hispanic	<High school diploma	Married/living with partner	1.16	low	1	72	95.3	165.9	yes	No	5.5	2.3	0.5	254	607.391	1.19565	2.3913	0.574442	Current	1440	active	No	No	1274.95	0.501332	0
44098	Male	34	Non-Hispanic White	High school diploma	Married/living with partner	1.09	low	2	64	81.7	178.5	yes	No	8.8	3	0.7	208	610.133	2.05333	2.93333	0.457703	Current	27120	active	No	No	3876.8	0.289309	0
44109	Male	42	Non-Hispanic Non-Hispanic White	<High school diploma	Living alone	0.35	low	2	67	95.1	166.5	no	No	3	2.4	0.4	236	295	0.5	1.25	0.571171	Current	25680	active	No	No	4243.37	0.274342	0
44112	Female	32	Mexican American	College diploma	Living alone	1.79	medium	2	72	115.7	158.5	yes	No	3.6	1.9	0.4	444	841.263	0.757895	1.89474	0.729968	Former	3360	active	Yes	No	3469.88	0.799094	0
44113	Male	45	Other Hispanic	College diploma	Married/living with partner	4.44	high	2	68	84.2	157.6	yes	No	3.6	2.3	0.6	262	410.087	0.93913	1.56522	0.534264	Current	20400	active	No	No	2561.61	0.337655	0
44121	Male	33	Non-Hispanic White	High school diploma	Living alone	0.7	low	2	60	96.9	172.2	yes	No	3.9	3.3	0.7	244	288.364	0.827273	1.18182	0.562718	Current	0	inactive	No	No	3373.7	2.52398	0
44128	Female	29	Non-Hispanic Non-Hispanic White	<High school diploma	Living alone	2.73	medium	2	68	78.7	168.3	no	No	1.9	1.7	0.3	285	318.529	0.335294	1.11765	0.467617	Never	0	inactive	No	No	4397.24	0.203748	0
44129	Female	51	Other Hispanic	College diploma	Married/living with partner	1.66	medium	1	60	95.5	163.6	yes	No	4	1.8	0.4	273	606.667	0.888889	2.22222	0.583741	Never	1920	active	Yes	Yes	1475.3	0.866671	0
44141	Female	77	Mexican American	<High school diploma	Married/living with partner	1.33	medium	1	65	89.1	142.4	no	No	5.5	2.7	0.6	294	598.889	1.22222	2.03704	0.625702	Never	0	inactive	Yes	No	1274.03	1.35972	0
44148	Female	32	Mexican American	High school diploma	Living alone	3.21	medium	2	71	97.8	159.2	yes	No	4.2	1.7	1.1	346	854.824	2.71765	2.47059	0.614322	Never	2400	active	No	No	3391.13	0.706768	0
44154	Male	35	Non-Hispanic White	College diploma	Living alone	4.84	high	1	62	120.9	183.2	yes	No	5.8	3	1.1	279	539.4	2.12667	1.93333	0.659934	Former	5160	active	No	No	10092.6	0.606668	0
44160	Female	33	Mexican American	<High school diploma	Married/living with partner	0.5	low	1	71	107.2	151.3	no	No	5.4	1.9	0.4	241	684.947	1.13684	2.84211	0.708526	Never	940	active	No	No	4043.32	0.44846	0
44162	Female	72	Non-Hispanic White	College diploma	Married/living with partner	1.65	medium	2	66	91.1	162	yes	No	9.7	2.1	0.9	206	951.524	4.15714	4.61905	0.562346	Current	0	inactive	No	No	6909.06	0.260322	0
44163	Female	45	Non-Hispanic White	<High school diploma	Living alone	1.25	low	2	63	80.6	157.9	yes	No	3.6	1.4	0.3	356	915.429	0.771429	2.57143	0.51045	Current	0	inactive	No	No	5374.26	0.303042	0
44171	Female	27	Non-Hispanic White	College diploma	Married/living with partner	1.94	medium	1	69	101.3	172.9	no	No	4.3	1.5	0.6	280	802.667	1.72	2.86667	0.585888	Never	3120	active	No	No	11851.8	0.40646	0
44173	Male	33	Non-Hispanic White	College diploma	Married/living with partner	5	high	2	67	98.9	183.6	yes	No	3.9	2	0.5	269	524.55	0.975	1.95	0.538671	Never	960	active	No	No	13594.2	0.424256	0
44177	Female	26	Non-Hispanic Non-Hispanic White	College diploma	Living alone	2.64	medium	1	68	85.4	166.5	no	No	3.7	2.1	0.3	304	535.619	0.528571	1.7619	0.512913	Never	5040	active	No	No	5369.93	0.113821	0
44180	Male	45	Other Hispanic	College diploma	Married/living with partner	2.35	medium	1	62	119.7	176.6	yes	No	4.5	1.7	0.5	194	513.529	1.32353	2.64706	0.677803	Never	11040	active	No	Yes	2691.7	1.79042	0
44190	Female	71	Non-Hispanic Non-Hispanic White	<High school diploma	Living alone	2.92	medium	1	73	90	160.5	yes	No	1.9	2	0.5	229	217.55	0.475	0.95	0.560748	Never	0	inactive	Yes	Yes	2084.62	0.305035	0
44197	Female	23	Non-Hispanic Non-Hispanic White	High school diploma	Living alone	0.47	low	1	59	117.8	162.8	yes	No	2.7	2.6	0.3	341	354.115	0.311538	1.03846	0.723587	Never	0	inactive	No	No	4382.82	0.251127	0
44200	Male	80	Non-Hispanic White	College diploma	Married/living with partner	5	high	2	71	100.8	158	no	No	3.7	1.3	0.5	249	708.692	1.42308	2.84615	0.637975	Never	960	active	Yes	No	3726.03	0.35493	0
44206	Male	45	Mexican American	<High school diploma	Married/living with partner	1.99	medium	2	65	91.5	159.1	yes	No	2	0.8	0.3	56	140	0.75	2.5	0.57511	Former	0	inactive	No	Yes	5071.65	1.30515	0
44213	Female	50	Non-Hispanic White	College diploma	Married/living with partner	5	high	1	70	85.5	158.7	no	No	3.8	3.1	0.7	337	413.097	0.858065	1.22581	0.538752	Never	1200	active	No	No	12881.7	0.453989	0
44221	Male	27	Non-Hispanic Non-Hispanic White	<High school diploma	Married/living with partner	1.81	medium	2	64	88.4	188.2	no	No	2.3	1.7	0.3	252	340.941	0.405882	1.35294	0.469713	Current	0	inactive	No	No	4247.23	0.2995	0
44229	Female	72	Non-Hispanic White	High school diploma	Married/living with partner	2.41	medium	2	63	104.8	164.9	yes	No	2.3	2.8	0.4	175	143.75	0.328571	0.821429	0.635537	Never	7680	active	Yes	Yes	5161.66	0.32744	0
44233	Male	65	Mexican American	<High school diploma	Living alone	1.69	medium	2	70	100.9	169.4	no	No	3.3	1.8	0.6	190	348.333	1.1	1.83333	0.595632	Former	2400	active	No	Yes	1004.49	1.54304	0
44237	Female	29	Non-Hispanic Non-Hispanic White	High school diploma	Married/living with partner	3.49	medium	1	68	83.3	169.8	yes	No	4.4	1.8	0.4	291	711.333	0.977778	2.44444	0.490577	Never	0	inactive	Yes	No	4932.78	0.156676	0
44238	Male	61	Non-Hispanic White	College diploma	Married/living with partner	2.98	medium	2	69	106.6	172.6	yes	No	3.5	2.7	0.6	246	318.889	0.777778	1.2963	0.617613	Former	1680	active	No	No	6600.07	0.665806	0
44243	Male	60	Mexican American	College diploma	Married/living with partner	5	high	1	69	115.6	191.7	yes	No	2.7	1	0.4	202	545.4	1.08	2.7	0.603026	Former	720	active	No	No	1232.63	0.811969	0
44247	Female	37	Non-Hispanic White	College diploma	Married/living with partner	3.78	high	1	63	92.5	169.4	no	No	2.4	1.7	0.5	275	388.235	0.705882	1.41176	0.546045	Never	1080	active	No	No	12641.2	0.249867	0
44249	Male	57	Other Hispanic	<High school diploma	Living alone	1.96	medium	1	73	103.5	170.8	yes	No	5.2	1.8	0.3	230	664.444	0.866667	2.88889	0.605972	Former	840	active	Yes	Yes	1811.15	0.751805	0
44250	Female	33	Mexican American	College diploma	Living alone	3.13	medium	2	74	101.7	143.2	no	Yes	9.4	2.4	0.6	481	1883.92	2.35	3.91667	0.710196	Never	560	inactive	No	No	2830.35	0.51005	1
44253	Male	33	Non-Hispanic Non-Hispanic White	<High school diploma	Married/living with partner	2.42	medium	1	68	79.5	175.8	yes	No	3.1	2.3	0.9	318	428.609	1.21304	1.34783	0.452218	Current	0	inactive	No	No	3870.44	0.249482	0
44254	Male	23	Non-Hispanic White	College diploma	Married/living with partner	4.08	high	1	63	83.3	179.7	yes	No	2	2.7	0.6	275	203.704	0.444444	0.740741	0.46355	Current	14160	active	No	No	15032.5	0.265488	0
44261	Male	45	Non-Hispanic White	High school diploma	Married/living with partner	1.45	medium	1	67	129.9	183.2	yes	No	3.6	1.7	0.5	148	313.412	1.05882	2.11765	0.709061	Never	480	inactive	No	Yes	12766.4	1.12537	0
44264	Male	38	Non-Hispanic Non-Hispanic White	College diploma	Living alone	4.72	high	2	69	97	181.3	yes	No	3.4	2.7	0.4	319	401.704	0.503704	1.25926	0.535025	Never	8880	active	Yes	No	2948.3	0.274892	0
44267	Male	37	Mexican American	<High school diploma	Married/living with partner	1.09	low	1	70	97.8	162.3	yes	No	3.1	1.9	0.4	207	337.737	0.652632	1.63158	0.602588	Never	17280	active	No	No	3744.19	0.252212	0
44269	Female	40	Non-Hispanic White	<High school diploma	Married/living with partner	0.58	low	1	61	79	158.8	no	No	3.7	1.3	0.3	200	569.231	0.853846	2.84615	0.497481	Current	4800	active	No	No	4973.37	0.550984	0
44287	Female	51	Mexican American	College diploma	Married/living with partner	4.36	high	1	70	97.2	166.3	yes	No	4	1.4	0.3	289	825.714	0.857143	2.85714	0.584486	Former	1440	active	Yes	No	1630.71	4.66634	0
44291	Female	39	Non-Hispanic White	College diploma	Living alone	0.75	low	2	60	82.2	155.7	yes	No	3.1	1.9	0.3	235	383.421	0.489474	1.63158	0.527938	Current	23040	active	No	Yes	6495.2	1.15914	1
44303	Male	32	Other Hispanic	<High school diploma	Living alone	2.07	medium	1	65	86.9	169.6	yes	No	3.3	2.4	0.5	285	391.875	0.6875	1.375	0.512382	Never	12960	active	No	No	3751.75	0.507438	0
44305	Male	53	Non-Hispanic White	College diploma	Married/living with partner	4.75	high	1	59	101.5	172.8	yes	No	4.4	2.6	0.7	307	519.538	1.18462	1.69231	0.587384	Current	2880	active	No	No	14368.5	1.25467	0
44307	Female	57	Other Hispanic	High school diploma	Married/living with partner	1.71	medium	1	61	86.6	150.1	no	No	4.1	1.7	0.5	191	460.647	1.20588	2.41176	0.576949	Never	800	active	Yes	Yes	1960.76	0.342688	0
44310	Male	20	Non-Hispanic White	College diploma	Living alone	1.47	medium	1	73	80	183.1	yes	No	3	1.9	0.8	214	337.895	1.26316	1.57895	0.43692	Never	4800	active	No	No	6543.79	0.312086	0
44316	Male	66	Other Hispanic	High school diploma	Married/living with partner	2.86	medium	2	62	115	165.6	yes	No	2	2.5	0.6	281	224.8	0.48	0.8	0.694444	Former	1080	active	Yes	No	1012.45	0.406684	0
44320	Male	48	Non-Hispanic White	College diploma	Married/living with partner	1.62	medium	1	61	105.2	189.1	yes	No	4	0.7	0.6	224	1280	3.42857	5.71429	0.556319	Never	7680	active	No	No	16989.9	0.481196	0
44338	Female	32	Non-Hispanic Non-Hispanic White	College diploma	Living alone	0.87	low	1	73	89	168.4	yes	No	6.1	2	0.4	328	1000.4	1.22	3.05	0.528504	Current	23040	active	No	No	4108.01	0.222863	0
44358	Female	25	Mexican American	College diploma	Living alone	2.21	medium	1	66	75.5	164.7	yes	No	3.8	2.6	0.4	287	419.462	0.584615	1.46154	0.458409	Never	3320	active	No	No	4473.29	0.261948	0
44380	Male	54	Other Hispanic	<High school diploma	Married/living with partner	0.73	low	1	73	100.6	165.1	yes	No	4.8	2.1	0.4	406	928	0.914286	2.28571	0.609328	Former	240	inactive	No	No	1905.45	3.09969	0
44382	Female	39	Non-Hispanic Non-Hispanic White	College diploma	Living alone	5	high	2	70	123.9	173.9	yes	No	2.3	2	0.4	262	301.3	0.46	1.15	0.712478	Never	8400	active	Yes	No	8615.72	0.544701	0
44387	Female	43	Non-Hispanic White	College diploma	Married/living with partner	2.54	medium	1	62	87.3	172.1	yes	No	4.4	1.9	0.6	249	576.632	1.38947	2.31579	0.507263	Never	0	inactive	No	No	3949.87	0.196351	0
44393	Male	24	Non-Hispanic White	College diploma	Married/living with partner	5	high	1	73	77.2	168.1	yes	No	3.3	2.6	0.6	253	321.115	0.761538	1.26923	0.45925	Never	200	inactive	No	No	14165.4	0.317559	0
44398	Male	39	Mexican American	College diploma	Married/living with partner	1.45	medium	1	70	86.7	182.7	yes	No	5.6	1	0.6	160	896	3.36	5.6	0.474548	Never	3840	active	No	No	3939.14	0.274517	0
44400	Male	60	Non-Hispanic White	College diploma	Living alone	1.92	medium	2	61	88.8	170.8	yes	No	3	1.2	0.5	178	445	1.25	2.5	0.519906	Former	1200	active	No	No	10509	0.387783	0
44404	Male	50	Non-Hispanic White	College diploma	Living alone	2.88	medium	2	60	80	172.8	yes	No	3.9	1.8	0.6	221	478.833	1.3	2.16667	0.462963	Current	0	inactive	No	No	14941.6	0.30476	0
44405	Female	64	Mexican American	<High school diploma	Living alone	2.62	medium	1	66	114	158.6	no	No	3.7	1.5	0.5	247	609.267	1.23333	2.46667	0.718789	Never	0	inactive	Yes	No	1466.54	0.424005	0
44408	Male	27	Mexican American	High school diploma	Married/living with partner	1.99	medium	2	70	73.7	171.9	no	No	1.4	2	0.5	249	174.3	0.35	0.7	0.428738	Never	1440	active	No	No	5334.22	0.285124	0
44410	Female	65	Non-Hispanic Non-Hispanic White	<High school diploma	Living alone	2.56	medium	2	68	87.2	154.7	yes	No	2	3.6	0.3	294	163.333	0.166667	0.555556	0.563672	Current	0	inactive	Yes	Yes	1607.2	0.915966	0
44412	Female	34	Non-Hispanic White	High school diploma	Living alone	3.5	medium	2	59	100.4	166.9	yes	No	5	3.3	0.9	418	633.333	1.36364	1.51515	0.601558	Never	2880	active	No	No	13858.7	1.20179	0
44415	Female	48	Non-Hispanic White	College diploma	Married/living with partner	5	high	1	59	74	163.6	yes	No	4.3	1.4	0.5	188	577.429	1.53571	3.07143	0.452323	Never	1200	active	No	No	14667.2	0.107001	0
44423	Male	30	Non-Hispanic White	College diploma	Living alone	4.29	high	2	72	94.3	168.1	no	No	2.8	2.5	0.7	241	269.92	0.784	1.12	0.560976	Former	1200	active	No	No	13706	0.3248	1
44427	Male	24	Non-Hispanic White	College diploma	Living alone	0.98	low	1	69	84.1	182.7	yes	No	2.6	1.8	0.6	244	352.444	0.866667	1.44444	0.460317	Former	26480	active	No	No	5251.16	0.283815	0
44429	Male	21	Non-Hispanic Non-Hispanic White	High school diploma	Married/living with partner	0.69	low	1	60	81.2	173.2	yes	No	2.9	2.4	0.8	225	271.875	0.966667	1.20833	0.468822	Current	9720	active	No	No	3317.42	0.442989	0
44433	Male	66	Non-Hispanic White	High school diploma	Married/living with partner	3.15	medium	1	61	115.9	177.5	yes	No	3.6	1.5	0.4	217	520.8	0.96	2.4	0.652958	Former	1800	active	No	Yes	7892.23	0.782217	0
44446	Male	48	Non-Hispanic Non-Hispanic White	College diploma	Married/living with partner	1.27	low	2	74	99	168.5	no	No	6.3	1.9	0.6	329	1090.89	1.98947	3.31579	0.587537	Current	960	active	No	No	3764.18	0.219758	0
44452	Male	27	Mexican American	High school diploma	Married/living with partner	0.73	low	1	72	89.2	171.4	yes	No	4.9	2.2	0.6	263	585.773	1.33636	2.22727	0.52042	Never	12240	active	No	No	5287.86	0.872863	0
44456	Male	43	Non-Hispanic White	College diploma	Married/living with partner	4.83	high	2	63	103.4	182.9	yes	No	3.7	1.2	0.4	189	582.75	1.23333	3.08333	0.565336	Never	0	inactive	Yes	Yes	19885.6	1.83477	0
44458	Female	33	Mexican American	College diploma	Living alone	1.48	medium	2	71	82	156.6	yes	No	3.2	2.2	0.5	309	449.455	0.727273	1.45455	0.523627	Never	0	inactive	No	No	3391.13	0.536974	0
44465	Female	63	Other Hispanic	College diploma	Living alone	2.31	medium	2	65	125	165.1	no	No	3.7	2	0.4	235	434.75	0.74	1.85	0.757117	Former	1080	active	Yes	No	1473.43	1.26279	1
44474	Female	73	Other Hispanic	College diploma	Living alone	0.88	low	1	72	98.3	157.8	yes	No	3.8	1.4	0.5	333	903.857	1.35714	2.71429	0.62294	Never	0	inactive	Yes	Yes	2008.17	0.781038	0
44481	Female	51	Other Hispanic	<High school diploma	Living alone	1.96	medium	1	73	99.8	158.7	yes	No	3	1.9	0.3	335	528.947	0.473684	1.57895	0.628859	Never	1920	active	No	No	1777.86	1.06744	0
44501	Male	27	Non-Hispanic Non-Hispanic White	<High school diploma	Married/living with partner	0.29	low	1	64	79	178.4	yes	No	3.9	1.8	0.4	276	598	0.866667	2.16667	0.442825	Never	3440	active	No	No	4093.37	0.315977	0
44514	Female	58	Non-Hispanic White	College diploma	Living alone	5	high	1	70	96.4	162.7	yes	No	2.8	2.5	0.6	288	322.56	0.672	1.12	0.592502	Never	3600	active	No	No	13562.4	0.30424	0
44540	Male	36	Mexican American	College diploma	Married/living with partner	5	high	1	65	90.4	172.6	no	No	2.7	1.9	0.4	278	395.053	0.568421	1.42105	0.523754	Former	11040	active	No	Yes	3751.75	5.22934	0
44554	Male	26	Other Race	College diploma	Living alone	1.44	medium	2	69	87.6	182.2	yes	No	2.1	1.1	0.3	208	397.091	0.572727	1.90909	0.48079	Never	2680	active	No	No	11669.8	0.31611	0
[truncated: 7,767 more rows]
